# Supplementary material for: Widespread Over-Expression of the X Chromosome in Sterile F1 Hybrid Mice
Source: PLoS Genet. 2010 Sep 30;6(9):e1001148. doi: 10.1371/journal.pgen.1001148 (PMC2947990; doi:10.1371/journal.pgen.1001148)
Supplement: Table S1 — Expression data for all 6,998 testis expressed genes. (2.98 MB XLS) [file pgen.1001148.s004.xls]

## Sheet: all_6998_genes
Table S1. 6998 testis expressed genes.
	P values from from gene by gene t-tests										normalized expression values
Gene ID	DxDvsDxM	DxDvsMxD	DxDvsMxM	DxMvsMxD	DxMvsMxM	MxDvsMxM	Sterility correlated (yes/no)	Chromosome	Expression in sterile males	cell type (MI,ME,PM,SO)	DxD_1	DxD_2	DxD_3	DxM_1	DxM_2	DxM_3	MxD_1	MxD_2	MxD_3	MxM_1	MxM_2	MxM_3
ENSMUSG00000004451	0.204444	0.0139	0.824498	0.0359715	0.26014	0.0160496	y	1	higher	SO	7.44647	7.63949	7.68534	7.61084	7.7984	7.8039	7.97536	8.10777	8.31486	7.49591	7.61084	7.73619
ENSMUSG00000009418	0.0732122	0.012057	0.015995	0.643505	0.516861	0.168007	n	1		SO	4.79488	4.61909	4.49741	6.05718	5.03946	5.7896	5.56465	5.17822	5.62419	6.23057	5.50687	5.94682
ENSMUSG00000009772	0.359829	0.557131	0.039405	0.825017	0.0597528	0.111207	n	1		SO	6.6524	6.51001	6.69242	6.57555	6.46067	6.59979	6.71592	6.19301	6.60479	6.34057	5.98045	5.91853
ENSMUSG00000013698	0.0168821	0.00190749	0.409458	0.00151153	0.0434841	0.004198	y	1	higher	SO	7.19001	7.02894	7.08912	7.39229	7.32721	7.38878	7.68636	7.61084	7.60874	7.26358	7.08826	7.14873
ENSMUSG00000020423	0.321668	0.353116	0.587362	0.985026	0.466484	0.572657	n	1		SO	5.84251	5.75089	6.01645	5.79457	5.74383	5.76714	5.69913	5.72147	5.88123	5.74126	5.7896	5.91229
ENSMUSG00000025921	0.963155	0.801235	0.0545519	0.780354	0.0658025	0.0547468	n	1		SO	6.14463	6.24791	6.3517	6.16042	6.38707	6.21021	6.36637	6.11098	6.18886	6.37369	6.62125	6.51196
ENSMUSG00000025950	0.00793103	0.00364891	0.0399743	0.23855	0.780542	0.554971	n	1		SO	6.84492	7.00335	6.79678	7.48313	7.87512	7.65865	7.69367	7.90367	8.08167	7.39229	7.74912	8.08454
ENSMUSG00000026005	0.804627	0.499891	0.897217	0.859296	0.887231	0.659406	n	1		SO	6.99909	7.13568	7.20366	6.9455	7.15592	7.34168	7.08318	7.16776	7.2655	7.11865	6.99385	7.26708
ENSMUSG00000026031	0.0771135	0.0229277	0.00710518	0.959638	0.11112	0.0381563	n	1		SO	5.4654	5.18059	5.32916	5.83742	5.98939	5.484	5.93708	5.68939	5.65584	6.14689	6.17566	6.20787
ENSMUSG00000026104	0.0547871	0.0799026	0.565711	0.250899	0.0903465	0.0510184	n	1		SO	6.89988	6.96411	7.02262	6.78105	6.81572	6.895	6.51438	6.71392	6.82861	6.93396	6.95656	7.13739
ENSMUSG00000026335	0.00148406	8.35643e-05	0.000639224	0.184996	0.043879	0.157021	n	1		SO	5.70044	5.53736	5.74971	7.29077	6.98157	6.91667	7.41464	7.16179	7.29307	7.3844	7.46679	7.76818
ENSMUSG00000026342	0.210336	0.536356	0.392211	0.314324	0.0399468	0.094218	n	1		SO	7.44483	7.60162	7.61704	7.36912	7.47724	7.50479	7.47724	7.57334	7.48154	7.59499	7.56947	7.69412
ENSMUSG00000026343	0.000662463	0.00446588	0.0632438	0.00587542	0.0001878	4.38715e-05	y	1	intermediate	SO	6.0999	5.88604	6.11242	4.90097	5.04696	5.04235	5.33618	5.40138	5.28773	6.27567	6.33128	6.25144
ENSMUSG00000026385	0.0209371	0.00221783	0.647076	0.0131594	0.0615258	0.016651	y	1	higher	SO	9.03633	9.25319	9.2179	9.38624	9.55467	9.55226	9.71926	9.85906	9.86145	8.9555	9.00668	9.33744
ENSMUSG00000026457	0.817347	0.158043	0.585189	0.120002	0.689659	0.0988992	n	1		SO	8.52486	8.72557	8.77317	8.60413	8.58229	8.76609	8.86103	8.7452	9.09369	8.52274	8.49888	8.78805
ENSMUSG00000026586	0.183097	0.30767	0.00721382	0.21563	0.0307295	0.0783814	n	1		SO	4.72234	4.88759	4.69098	4.87737	4.91922	4.86193	4.79889	4.51732	3.87157	5.17204	5.20907	5.40945
ENSMUSG00000026600	0.0815638	0.767578	0.0533868	0.314005	0.100559	0.0498522	n	1		SO	7.72379	7.98032	7.87318	7.46374	7.7267	7.64079	7.80722	7.55727	8.05563	7.31058	6.49297	7.05068
ENSMUSG00000026604	0.0559977	0.750202	0.00589599	0.164364	0.0070787	0.0254586	n	1		SO	5.37996	5.41268	5.38847	5.70044	5.53956	5.78038	5.57135	5.41268	5.01626	6.14852	6.05838	6.27835
ENSMUSG00000026617	0.954767	0.359008	0.101058	0.420161	0.129747	0.0468748	n	1		SO	6.98157	7.11566	7.26617	6.92857	7.23801	7.22036	7.05486	7.3725	7.34375	6.76688	7.01757	6.87783
ENSMUSG00000026663	0.104952	0.657582	0.0885151	0.0174644	0.0187676	0.113575	n	1		SO	5.67766	5.81025	5.79934	5.67766	5.67766	5.601	5.75716	5.82975	5.77085	5.8737	5.84706	6.00591
ENSMUSG00000026667	0.00944635	0.184406	0.00222349	0.00478008	0.00955422	0.000654433	y	1	lower	SO	6.16922	6.08274	6.10855	6.55637	6.6064	6.41547	6.05718	6.04843	5.83633	6.97004	6.79918	6.99909
ENSMUSG00000032666	0.0265586	0.00146811	0.0597391	0.0254939	0.303792	0.0100801	y	1	higher	SO	6.03449	6.02886	6.13548	6.32241	6.20956	6.39759	6.62818	6.58651	6.6246	6.24378	6.13439	6.29494
ENSMUSG00000038633	0.814334	0.0947992	0.357578	0.117236	0.316419	0.0679764	n	1		SO	7.22097	7.39027	7.4035	7.32833	7.40857	7.32781	7.41201	7.69067	7.73445	6.92857	7.17549	7.40995
ENSMUSG00000039246	0.478065	0.046176	0.0015446	0.0604896	0.00116027	0.00845225	n	1		SO	6.12819	6.02239	6.03975	6.15811	6.04097	6.10168	6.48438	6.42751	6.2172	5.67048	5.77317	5.71741
ENSMUSG00000042215	0.382338	0.0663996	0.0357716	0.0735112	0.0398711	0.538081	n	1		SO	6.99662	7.22164	7.24438	7.15028	7.2566	7.34499	7.41584	7.45556	7.44405	7.38075	7.5119	7.52613
ENSMUSG00000048126	0.0665636	0.111822	0.103466	0.700737	0.807577	0.605915	n	1		SO	6.67008	6.89009	7.014	7.24127	7.03871	7.25381	7.54445	7.18478	7.02132	6.97433	7.29634	7.17145
ENSMUSG00000007107	0.148028	0.459232	0.368836	0.0596638	0.187469	0.12672	n	1		PM	11.3711	11.1305	11.1211	11.4569	11.3491	11.3524	11.268	11.0755	10.9978	11.2892	11.2465	11.3754
ENSMUSG00000010175	0.158309	0.0542833	0.852205	0.239967	0.17875	0.0448325	n	1		PM	5.82154	5.72265	5.89507	5.59736	5.24131	5.70745	5.50341	4.95399	5.20907	5.86371	5.5842	6.08658
ENSMUSG00000015962	0.00142016	0.685388	0.0156359	0.00567835	0.676165	0.00948764	y	1	lower	PM	10.7797	10.719	10.8154	11.0499	11.1453	11.0708	10.7851	10.8013	10.6562	11.0146	11.1211	11.2234
ENSMUSG00000016493	0.852013	0.0490439	0.894645	0.0564205	0.963575	0.162513	n	1		PM	8.30292	8.35971	8.57235	8.31544	8.53	8.32511	8.20487	7.82086	7.79795	7.97415	8.66131	8.50191
ENSMUSG00000018196	0.852031	0.0160188	0.333354	0.00800948	0.268269	0.0978818	y	1	lower	PM	10.5667	10.7245	10.7702	10.598	10.7509	10.761	10.2918	10.3816	10.3112	10.3955	10.6494	10.6609
ENSMUSG00000022995	0.369276	0.271532	0.361703	0.580626	0.459613	0.582319	n	1		PM	9.2179	8.98567	8.86512	9.06625	8.24504	8.88603	9.09669	7.78055	8.49008	9.15746	8.46698	5.50913
ENSMUSG00000026107	0.183671	0.0555901	0.146544	0.317245	0.695763	0.665506	n	1		PM	9.32402	9.5713	9.5694	9.51932	9.72871	9.74794	9.67564	9.79028	9.83644	9.52482	9.81077	9.81314
ENSMUSG00000026113	0.0131584	0.000998405	0.000264582	0.0145943	0.00145979	0.0187887	y	1	intermediate	PM	7.92489	7.76647	7.84573	7.47245	7.57122	7.33408	7.13465	7.13358	6.94048	6.64581	6.84947	6.66956
ENSMUSG00000026115	0.977892	0.00813724	0.876674	0.000402752	0.873304	0.0109695	y	1	lower	PM	10.6325	10.6998	10.7539	10.6621	10.7231	10.7046	10.4351	10.4525	10.4	10.6494	10.7797	10.6832
ENSMUSG00000026155	0.975837	0.0821976	0.137943	0.0933274	0.165468	0.431424	n	1		PM	10.2222	10.3843	10.4385	10.279	10.2776	10.4979	10.1642	10.0092	10.2313	10.1642	10.2605	10.1787
ENSMUSG00000026202	0.7492	0.0117058	0.193995	0.019142	0.351956	0.00822767	y	1	lower	PM	11.1727	11.2413	11.268	11.2098	11.3556	11.1808	10.9748	11.0547	10.9074	11.2512	11.4339	11.3033
ENSMUSG00000026226	0.50511	0.0782409	0.505062	0.0465291	0.297832	0.0975348	n	1		PM	11.7791	11.8323	11.7812	11.8323	11.888	11.7634	11.6899	11.6411	11.488	11.7812	11.8199	11.7066
ENSMUSG00000026301	0.0189933	0.00280056	0.0272962	0.126383	0.00485748	0.00798609	n	1		PM	7.94874	7.88266	7.78953	7.47579	7.53665	7.6844	7.40169	7.4684	7.3844	8.30856	8.16714	8.50389
ENSMUSG00000026399	0.742035	0.0842257	0.710696	0.00929041	0.852352	0.121982	n	1		PM	7.89994	8.15121	8.30735	8.05604	8.22049	8.22461	7.7399	7.71536	7.78953	7.85931	8.30671	8.451
ENSMUSG00000026409	0.0323385	0.000483425	0.0359181	0.0341304	0.204114	0.00240214	y	1	lower	PM	6.86189	6.92012	6.96411	6.54742	6.55026	6.75206	6.37182	6.38504	6.25955	6.82861	6.69242	6.70687
ENSMUSG00000026466	0.0526614	0.350719	0.713124	0.0110445	0.320477	0.392421	n	1		PM	11.3727	11.3953	11.5068	11.5118	11.6296	11.5789	11.4221	11.3647	11.3272	11.2973	11.5701	11.5213
ENSMUSG00000026469	0.0917483	0.461957	0.000722327	0.224752	0.00157886	0.000971274	n	1		PM	7.22222	7.14511	7.12373	7.22941	7.31381	7.22419	7.2544	7.17204	7.16555	7.62018	7.72444	7.60274
ENSMUSG00000026482	0.647985	0.383693	0.0217308	0.193033	0.00478386	0.0681141	n	1		PM	8.40707	8.13154	8.1431	8.3768	8.18702	8.27618	8.2855	8.04059	7.97095	7.88828	7.83268	7.67792
ENSMUSG00000026523	0.33056	0.109357	0.205088	0.133044	0.995693	0.0627076	n	1		PM	10.1734	10.2479	10.2978	10.2657	10.5162	10.2618	10.1234	10.1906	10.1292	10.2313	10.4187	10.3955
ENSMUSG00000026532	0.0122946	0.0354837	0.15847	0.551687	0.0602185	0.0341726	n	1		PM	6.91789	6.93003	6.82737	6.67588	6.68735	6.64649	6.5292	6.74781	6.59398	6.92354	7.22663	7.36545
ENSMUSG00000026585	0.303886	0.264983	0.184786	0.788925	0.201825	0.190472	n	1		PM	9.38503	9.37936	9.42655	9.19627	9.37092	9.37936	9.34827	9.14759	9.37092	9.44392	9.41057	9.42457
ENSMUSG00000026592	0.162254	0.10408	0.59489	0.0580238	0.0371248	0.146379	n	1		PM	10.9503	10.8201	10.9555	11.0324	10.999	10.9706	10.8136	10.743	10.5468	10.8617	10.8327	10.9369
ENSMUSG00000026639	0.000384191	0.00102117	0.00266734	0.37192	0.572422	0.239452	n	1		PM	7.33286	7.26617	7.28304	6.2007	6.064	6.20868	6.12146	5.96212	6.15811	6.21577	6.08373	6.33574
ENSMUSG00000026649	0.362587	0.244758	0.0617249	0.582904	0.117725	0.141409	n	1		PM	11.1411	11.2258	11.2393	11.2132	11.2393	11.264	11.218	11.2709	11.268	11.2657	11.4118	11.4221
ENSMUSG00000026729	0.00127086	0.0271401	0.625603	0.964679	0.0737176	0.0592347	n	1		PM	8.25143	8.19718	8.15912	8.59191	8.63015	8.62115	8.71833	8.65984	8.45291	8.06149	8.32388	8.40083
ENSMUSG00000033257	0.0577704	0.00452274	0.556625	0.0424495	0.0557572	0.011442	y	1	lower	PM	8.29822	8.16389	8.19083	8.13989	7.99558	8.05328	7.91338	7.95314	7.84169	8.15515	8.27981	8.35743
ENSMUSG00000036574	0.176305	0.581651	0.82529	0.504553	0.76177	0.998661	n	1		PM	9.4951	9.37772	9.40113	9.84685	9.61636	9.46844	9.73634	9.54265	9.26546	9.90461	9.84817	8.7938
ENSMUSG00000036975	0.0390736	0.0179941	0.0281031	0.0875697	0.521611	0.0455008	n	1		PM	7.77687	7.8115	7.75866	7.45588	7.52978	7.64247	7.21731	7.42662	7.40108	7.56203	7.66918	7.53986
ENSMUSG00000037529	0.0464052	0.117017	0.149772	0.0464831	0.0384269	0.557472	n	1		PM	8.90295	8.91221	8.99256	9.00451	9.03818	9.08069	8.63802	8.8766	8.77828	8.77317	8.76151	8.92661
ENSMUSG00000037568	0.173043	0.0646867	0.546723	0.236474	0.326782	0.0705041	n	1		PM	9.83122	9.88095	9.84817	9.71353	9.50516	9.8008	9.5883	9.28644	9.58669	9.81457	9.66882	9.91927
ENSMUSG00000040485	0.101911	0.0239174	0.0235688	5.39289e-05	0.122638	0.00859561	y	1	lower	PM	8.13789	8.25194	8.40815	8.42873	8.51039	8.49634	7.8585	7.86946	7.79143	8.52588	8.82251	8.80836
ENSMUSG00000042501	0.0366287	0.000394442	0.0293739	0.0480237	0.0590385	0.253623	y	1	intermediate	PM	6.13439	6.16462	6.15127	6.3913	6.54562	6.65508	6.81286	6.80283	6.88037	6.82967	7.0531	7.40169
ENSMUSG00000042554	0.02116	0.00271314	0.268672	0.0175384	0.264436	0.0381184	y	1	lower	PM	10.3031	10.4045	10.4685	10.1025	10.1716	10.195	9.88974	9.99573	10.0083	10.1211	10.3309	10.3659
ENSMUSG00000042800	0.0389114	0.336762	0.0768904	0.0453584	0.914977	0.0374788	y	1	lower	PM	10.2689	10.1137	10.3031	10.4838	10.4366	10.5076	10.2126	10.185	9.94115	10.3342	10.4929	10.6325
ENSMUSG00000043429	0.390551	0.0699895	0.653559	0.0367298	0.33748	0.191714	n	1		PM	9.4073	9.21414	9.31919	9.54378	9.23394	9.49257	9.18347	8.88128	8.81645	9.18508	9.03633	9.49747
ENSMUSG00000043629	0.325944	0.963246	0.202183	0.576801	0.412294	0.28566	n	1		PM	11.8492	11.8408	11.8752	11.8531	11.9212	11.8714	11.8092	11.936	11.8133	11.8492	11.9524	11.9604
ENSMUSG00000044340	0.00607921	0.00214855	0.607784	0.109727	0.0586264	0.0236712	n	1		PM	9.18977	8.96069	9.05689	8.64141	8.49197	8.66621	8.55295	8.36973	8.38128	8.868	8.88672	9.22497
ENSMUSG00000044835	0.895294	0.044127	0.620508	0.0171025	0.569724	0.336714	y	1	lower	PM	8.74163	8.85223	8.95157	8.76968	8.91608	8.89166	8.59191	8.63906	8.57235	8.57422	9.02217	8.70606
ENSMUSG00000045336	0.628196	0.90202	0.766741	0.425062	0.990793	0.704539	n	1		PM	10.2431	10.4256	10.4896	10.2144	10.3932	10.4	10.4238	10.3796	10.386	10.0499	10.5012	10.4506
ENSMUSG00000046367	0.235288	0.0169654	0.0184506	0.0232941	0.0180842	0.140243	y	1	lower	PM	8.77828	8.76248	8.88539	8.85714	8.88486	8.8766	8.56006	8.41005	8.31684	8.50637	8.61741	8.64303
ENSMUSG00000049160	0.0598518	0.156676	0.0355978	0.0985193	0.212049	0.0166628	n	1		PM	8.41833	7.06057	8.0134	8.82251	9.33528	9.40583	8.46911	8.73899	8.87487	9.28644	9.85984	9.52289
ENSMUSG00000055322	0.65851	0.457268	0.735929	0.230517	0.4407	0.692289	n	1		PM	10.0523	9.50115	9.40656	10.0659	9.58195	9.67234	9.81216	9.2171	9.24016	9.97486	9.37145	9.29388
ENSMUSG00000055547	0.0973448	0.193566	0.00736271	0.0516655	0.0290433	0.00870186	n	1		PM	9.39022	9.47378	9.59356	9.56502	9.82246	9.9181	9.30776	9.37633	9.435	10.0566	10.3769	10.3925
ENSMUSG00000055833	0.0985632	0.0186839	0.00779768	0.0187988	0.00465353	0.252398	y	1	lower	PM	6.82737	6.84416	6.85317	6.72947	6.75286	6.81872	5.98045	6.14522	5.71597	6.01748	6.21504	6.20586
ENSMUSG00000064294	0.00277188	0.0446333	0.0141304	0.0457377	0.00485676	0.00597491	y	1	intermediate	PM	8.29776	8.34752	8.32555	8.12757	8.18847	8.13193	8.27685	8.23958	8.19626	8.67617	8.67039	8.84162
ENSMUSG00000070489	0.688825	0.28383	0.382243	0.22299	0.312493	0.963057	n	1		PM	9.3266	8.9896	9.11547	9.42655	9.02649	9.17625	9.25227	8.69932	8.43061	9.25107	8.93838	8.24939
ENSMUSG00000071890	0.0343603	0.00752515	0.760896	0.127196	0.026039	0.00628175	n	1		PM	8.32511	8.62272	8.668	7.88087	8.15998	8.19017	7.67103	7.77954	7.99325	8.39743	8.59113	8.77745
ENSMUSG00000073643	0.439403	0.400265	0.017139	0.250897	0.0239691	0.0266197	n	1		PM	9.26817	9.25461	9.32298	9.40525	9.2465	9.32986	9.3502	9.16355	9.06625	9.62493	9.46844	9.60746
ENSMUSG00000079330	0.866206	0.0756669	0.598857	0.0762708	0.537841	0.512141	n	1		PM	8.51297	8.73333	8.83686	8.51155	8.83005	8.81773	8.34634	8.35743	8.5213	8.173	8.77895	8.7452
ENSMUSG00000006010	0.00148668	0.00188931	0.00124321	0.489095	0.00449154	0.00318419	n	1		MI	6.4199	6.50525	6.6064	5.85716	5.96801	6.01195	5.79797	6.00934	5.84862	4.97436	4.57551	4.69098
ENSMUSG00000006412	0.0943639	0.0524973	0.468694	0.634866	0.0419885	0.00241838	n	1		MI	8.71433	8.89243	8.90595	8.96732	9.16244	8.96928	9.08317	9.02989	9.096	8.78049	8.83307	8.72761
ENSMUSG00000007097	0.0539421	0.0306492	0.0283405	0.363866	0.186348	0.558425	n	1		MI	7.33342	7.17642	7.18836	7.02836	6.76986	7.02191	6.94048	6.6165	6.8641	6.92073	6.53471	6.67996
ENSMUSG00000009907	0.136231	0.0292308	0.833582	0.336656	0.222054	0.057915	n	1		MI	7.74875	7.85059	7.85363	7.91762	8.07634	7.87652	8.0134	8.14819	7.97351	7.72319	7.84789	7.92913
ENSMUSG00000025920	0.0404197	0.0570223	0.329542	0.724155	0.0187735	0.0294938	n	1		MI	5.85214	5.87124	5.91344	5.63157	5.74971	5.75982	5.79274	5.65167	5.62005	5.9791	5.88953	5.88845
ENSMUSG00000025955	0.751685	0.0615523	0.365911	0.079029	0.239916	0.0253194	n	1		MI	9.92569	10.3175	10.0092	10.1245	10.3516	9.9463	10.4431	10.5315	10.5502	9.85217	9.76985	10.1339
ENSMUSG00000025958	0.898424	0.719709	0.0497654	0.550729	0.0490122	0.0299622	n	1		MI	6.24791	6.0817	6.13439	6.16698	6.14852	6.16985	6.064	6.10317	6.21876	6.25955	6.34371	6.40155
ENSMUSG00000025979	0.709787	0.384797	0.508394	0.613526	0.760735	0.850835	n	1		MI	7.29376	7.7004	7.5061	7.32148	7.72516	7.65936	7.46374	7.65008	7.87551	7.3802	7.67861	7.82411
ENSMUSG00000026003	0.0318345	0.00418517	0.0314485	0.0661403	0.240938	0.878216	n	1		MI	7.60976	7.85363	7.74912	8.06434	8.06048	8.12169	8.27486	8.23048	8.45847	8.24283	8.10187	8.5451
ENSMUSG00000026043	0.580955	0.032382	0.331358	0.0379	0.127751	0.00760809	y	1	higher	MI	8.22857	8.61509	9.04353	8.95778	8.43363	9.04256	9.93797	9.31274	9.59166	7.92056	8.37751	8.57422
ENSMUSG00000026176	0.00582332	0.63527	0.529827	0.362864	0.891889	0.710812	n	1		MI	7.13358	7.03586	7.01859	7.37503	7.26312	7.33624	7.4416	7.06468	6.93659	7.75866	7.31985	6.76241
ENSMUSG00000026179	0.975104	0.368792	0.112012	0.407214	0.166293	0.0683006	n	1		MI	8.81182	8.60268	8.54188	8.85223	8.40152	8.68702	9.12718	8.62346	8.74834	8.58075	8.26976	8.18335
ENSMUSG00000026223	0.20566	0.0236856	0.00270612	0.0612863	0.0804622	0.000865658	n	1		MI	9.15081	9.26453	9.18564	9.12642	9.10006	8.79203	9.44215	9.31435	9.37936	8.79734	8.61979	8.65754
ENSMUSG00000026234	0.000469062	0.0931566	0.890224	0.538458	0.220839	0.144835	n	1		MI	9.03818	9.05527	8.97028	9.36897	9.41603	9.46309	9.72247	9.19449	9.72008	9.38229	9.03538	8.52973
ENSMUSG00000026289	0.365136	0.336549	0.0591722	0.134449	0.0468106	0.244234	n	1		MI	6.34107	6.25759	6.10555	6.24692	6.16462	5.92019	6.33622	6.4728	6.22247	6.38158	6.45643	6.56895
ENSMUSG00000026349	0.301947	0.386504	0.922522	0.106975	0.255988	0.305476	n	1		MI	5.86099	5.88845	5.71741	5.6447	5.78394	5.78635	5.78038	5.9791	5.9439	5.74971	5.84251	5.85496
ENSMUSG00000026355	0.0547813	0.0478655	0.029181	0.816266	0.300203	0.390226	n	1		MI	6.83532	7.18404	7.2612	7.37863	7.71306	7.54597	7.36772	7.64354	7.73578	7.49029	7.79228	8.01009
ENSMUSG00000026374	0.435971	0.0519549	0.175877	0.228769	0.391767	0.869262	n	1		MI	7.69486	7.76818	7.69578	7.80992	7.65329	7.92963	8.0183	7.82196	7.98597	7.87208	7.77775	8.11393
ENSMUSG00000026414	4.91362e-05	0.0012354	0.00108992	0.00187522	0.0671234	0.00759425	y	1	intermediate	MI	4.82112	4.86193	4.64564	6.85856	6.60888	6.81966	5.7761	5.68737	5.67155	7.1018	7.08656	7.55214
ENSMUSG00000026456	0.0643126	0.00102617	0.0460115	0.00328456	0.116358	0.201338	y	1	higher	MI	8.06732	8.14769	8.13363	8.19149	8.32438	8.22049	8.60897	8.52419	8.65575	8.34846	8.3832	8.60897
ENSMUSG00000026470	0.237463	0.0152743	0.126413	0.0278864	0.0887618	0.00556011	y	1	higher	MI	7.15287	7.2055	7.203	7.23593	7.21348	7.19904	7.41158	7.35663	7.49133	7.12012	6.97573	7.11959
ENSMUSG00000026484	0.996152	0.192279	0.418429	0.14988	0.328574	0.0589677	n	1		MI	8.4556	8.72704	8.74284	8.52011	8.6632	8.74041	8.78447	8.72851	9.02989	8.40661	8.563	8.6398
ENSMUSG00000026502	0.38117	0.382246	0.468179	0.240869	0.647582	0.296651	n	1		MI	8.0902	7.97631	7.9962	8.17113	7.99874	8.07526	8.10894	7.7009	7.85471	8.0923	8.02506	8.045
ENSMUSG00000026510	0.171448	0.472203	0.280694	0.354214	0.0825821	0.130939	n	1		MI	6.05417	5.78505	5.91229	5.74267	5.7237	5.81423	5.94205	5.72265	5.84706	6.12528	5.88277	6.23557
ENSMUSG00000026526	0.718045	0.344252	0.0294991	0.425581	0.040047	0.0580281	n	1		MI	9.12421	9.27632	9.38104	9.11862	9.2915	9.26389	9.11547	9.16125	9.22679	8.3682	8.69854	8.84692
ENSMUSG00000026553	0.1184	0.00139856	0.206587	0.0240285	0.866422	0.0904076	y	1	higher	MI	9.77791	9.73634	9.65486	9.93305	9.88425	9.75271	10.169	10.1066	10.0854	9.81002	9.77219	10.0423
ENSMUSG00000026566	0.712353	0.0428667	0.296517	0.0298224	0.12619	0.00977379	y	1	higher	MI	7.75193	7.99059	8.03914	7.94506	8.06206	7.89738	8.25562	8.15033	8.39098	7.65865	7.7812	7.92056
ENSMUSG00000026576	0.0164759	0.0344931	0.00769638	0.286058	0.97763	0.284458	n	1		MI	8.04625	8.15343	8.09731	8.39582	8.27444	8.44918	8.61509	8.32731	8.57539	8.44508	8.29995	8.38038
ENSMUSG00000026584	0.339194	0.394398	0.487658	0.801583	0.227034	0.227146	n	1		MI	7.18932	7.35463	7.39996	7.10824	7.3229	7.22279	6.94485	7.32195	7.27678	7.22279	7.40601	7.63372
ENSMUSG00000026603	0.598354	0.0472382	0.0729984	0.0663898	0.0673867	0.025243	n	1		MI	7.72839	7.58159	7.57581	7.70529	7.59499	7.69067	7.96467	7.7984	7.78182	7.17487	7.02315	7.46483
ENSMUSG00000026608	0.873563	0.0581696	0.774369	0.0404277	0.684512	0.119503	n	1		MI	7.45556	7.74779	7.76049	7.66017	7.81741	7.55068	7.85576	8.01911	8.09126	7.29376	7.65216	7.84169
ENSMUSG00000026627	0.280405	0.452283	0.00690478	0.244229	0.0114748	0.0369448	n	1		MI	7.24487	7.32985	7.3838	7.33162	7.20879	7.19704	7.37009	7.26473	7.63592	6.87121	6.8764	6.85602
ENSMUSG00000026670	0.141706	0.204058	0.823714	0.0773808	0.10824	0.243765	n	1		MI	7.07605	7.15082	7.22036	7.0576	7.00924	7.09851	7.26617	7.1672	7.42258	7.11058	7.13236	7.24658
ENSMUSG00000026678	0.0314184	0.00941634	0.0198834	0.0722993	0.845308	0.20403	n	1		MI	5.59224	5.31079	5.60558	6.02347	5.93385	5.92608	6.21876	6.13548	6.02988	5.84981	6.12146	5.96676
ENSMUSG00000026782	0.0312422	0.0193436	5.07715e-05	0.0513287	0.173275	0.154724	n	1		MI	7.62981	7.58245	7.58604	7.77649	7.96864	7.87551	8.13989	8.05072	8.34485	7.96657	8.0134	7.97859
ENSMUSG00000032883	0.202783	0.980444	0.469315	0.220464	0.899576	0.481292	n	1		MI	7.35295	7.43442	7.48025	7.44544	7.74973	7.55727	7.30566	7.50192	7.46566	7.30448	7.53819	7.83693
ENSMUSG00000032968	0.383532	0.017971	0.00164834	0.0334103	0.0010669	0.000417075	y	1	higher	MI	9.35445	9.50742	9.37772	9.53438	9.40583	9.47781	9.67125	9.61636	9.79991	8.97689	8.88915	8.80321
ENSMUSG00000037015	0.305149	0.00452643	0.453887	0.0726088	0.796596	0.0585526	n	1		MI	7.97797	8.06048	8.0708	8.05328	8.23412	8.06481	8.25254	8.27299	8.36125	7.97536	8.13631	8.17113
ENSMUSG00000037035	0.0481065	0.0811761	0.159772	0.576281	0.595808	0.363688	n	1		MI	7.34828	7.28915	7.21477	7.61117	7.41584	7.67155	7.77954	7.41201	7.77343	7.57393	7.29504	7.61084
ENSMUSG00000037461	0.449396	0.450895	0.00633773	0.861198	0.0423401	0.0157507	n	1		MI	7.99874	7.94202	7.91718	8.00102	7.8907	7.79795	7.99269	7.8907	7.84723	7.7502	7.65468	7.62172
ENSMUSG00000037470	0.0453348	0.032469	0.241457	0.764521	0.357253	0.409626	n	1		MI	6.89935	6.72402	6.76862	7.1285	7.08049	6.91471	7.04864	7.04712	6.95725	6.84492	6.86067	7.09396
ENSMUSG00000037499	0.504828	0.0412374	0.617148	0.404613	0.377376	0.158798	n	1		MI	6.64201	6.47001	6.55086	6.83211	6.41751	6.72152	6.78782	6.79599	6.77706	6.48773	6.20463	6.70787
ENSMUSG00000037503	0.333889	0.0362276	0.0254893	0.177183	0.0419125	0.178975	n	1		MI	7.22036	7.20254	7.15637	7.37647	7.27848	7.16064	7.49465	7.38603	7.32833	7.53774	7.42422	7.64665
ENSMUSG00000038235	0.0418	0.0116536	0.82498	0.0543652	0.0415315	0.00846503	n	1		MI	7.77343	7.80992	7.92681	8.01069	8.08059	7.95377	8.14231	8.10497	8.17607	7.84841	7.92374	7.78182
ENSMUSG00000038776	0.941184	0.0291866	0.218655	0.00301639	0.19958	0.149978	y	1	higher	MI	8.783	9.11794	8.70343	8.86394	9.00313	8.7718	9.41504	9.55897	9.50244	9.07412	8.9476	9.45158
ENSMUSG00000038806	0.982131	0.661194	0.13548	0.797105	0.185603	0.0947529	n	1		MI	7.04184	7.01462	7.02078	7.0299	7.12924	6.92265	7.03932	7.04534	6.93944	7.05357	7.17687	7.23884
ENSMUSG00000040713	0.243848	0.458187	0.329573	0.845996	0.253026	0.229732	n	1		MI	9.32131	9.10006	9.20558	9.52418	9.2359	9.31274	9.7496	9.01	9.46216	9.42748	8.59304	7.72839
ENSMUSG00000041483	0.093993	0.187707	0.829259	0.384209	0.18738	0.164953	n	1		MI	7.68369	7.76326	7.81609	7.8666	7.87595	7.86817	7.91666	7.85576	8.30671	7.86946	7.64556	7.69308
ENSMUSG00000041859	0.232123	0.00824217	0.241609	0.143649	0.871856	0.244595	n	1		MI	6.81872	6.7614	6.70497	6.94185	6.75149	6.87713	7.04184	6.9455	6.95536	6.86734	6.7573	6.99113
ENSMUSG00000042684	0.0881546	0.857176	0.069667	0.0737765	0.789432	0.0601908	n	1		MI	7.28407	7.55214	7.58539	6.82675	7.19001	7.25912	7.34782	7.51147	7.63527	6.83739	6.96506	7.30721
ENSMUSG00000042699	0.0697968	0.216581	0.290429	0.5793	0.151787	0.099309	n	1		MI	8.59897	8.8433	8.65984	8.85602	8.93617	8.99399	9.11994	8.68006	9.40216	8.75572	8.3687	7.80343
ENSMUSG00000045210	0.879962	0.133953	0.74153	0.268376	0.698625	0.397771	n	1		MI	7.23751	7.38701	7.41319	7.2455	7.52943	7.20588	7.39229	7.54706	7.50388	7.25092	7.55068	7.34782
ENSMUSG00000045658	0.2014	0.0388891	0.00175322	0.946225	0.0256075	0.00087721	n	1		MI	5.2341	5.21679	5.41268	5.484	5.80902	5.33618	5.54965	5.6003	5.44637	6.38707	6.33453	6.39191
ENSMUSG00000045954	0.869462	0.801363	0.605265	0.603607	0.38217	0.754981	n	1		MI	5.14711	4.88263	5.17822	5.11545	4.94303	5.09173	4.96908	5.11545	5.21947	5.04696	5.09173	5.26386
ENSMUSG00000046062	0.0454157	0.0584679	0.104774	0.00667509	0.656591	0.0282103	y	1	lower	MI	7.34022	7.2142	7.27521	7.43442	7.36772	7.51517	7.18564	7.15457	7.04592	7.43031	7.3802	7.63949
ENSMUSG00000048234	0.662374	0.131855	0.671456	0.182768	0.320072	0.0181383	n	1		MI	7.85233	8.23778	8.25663	8.22116	7.99123	8.37966	8.36526	8.33237	8.56601	8.13502	7.98129	8.03046
ENSMUSG00000048874	0.117097	0.582549	0.770747	0.0943862	0.121057	0.517089	n	1		MI	6.06168	6.06074	6.05417	6.23355	6.0999	6.1524	6.11441	5.95543	6.01645	6.07598	6.0206	6.10473
ENSMUSG00000051223	0.0751828	0.010992	0.0546674	0.0594465	0.407027	0.0962713	n	1		MI	9.51463	9.79074	9.67125	9.81457	9.95705	9.92651	10.0361	10.1984	10.3371	9.90112	9.94227	10.0024
ENSMUSG00000052428	0.021975	0.00726413	0.0472701	0.084337	0.562819	0.301239	n	1		MI	8.64794	8.82826	8.84692	8.99399	9.13024	9.2359	9.28834	9.3061	9.57028	9.00175	9.21098	9.41362
ENSMUSG00000053332	0.0582319	0.108048	0.416269	0.650328	0.525474	0.378464	n	1		MI	8.60268	8.60548	8.52219	8.73066	8.94311	8.75501	8.73398	9.09297	8.79518	8.53281	8.63225	8.95473
ENSMUSG00000054545	0.327535	0.0597051	0.207475	0.0441055	0.0752316	0.03365	y	1	higher	MI	7.72045	8.12575	7.79143	8.13688	8.10187	7.89994	8.40214	8.28766	8.28131	7.489	7.36772	7.87902
ENSMUSG00000057363	0.00406014	0.0138525	0.0027743	0.177639	0.131391	0.669468	n	1		MI	7.49638	7.36242	7.41391	7.79228	7.70826	7.7004	8.02198	7.75062	7.89238	7.93818	7.77897	7.81919
ENSMUSG00000073481	0.170346	0.0415593	0.613953	0.139357	0.567471	0.106852	n	1		MI	9.09369	9.01702	8.92155	9.21953	9.05689	9.10352	9.45158	9.20084	9.25107	9.16062	8.89776	9.13678
ENSMUSG00000016526	0.291976	0.19989	0.0518682	0.716887	0.0687647	0.0617789	n	1		ME	10.8862	10.9633	10.9046	10.8519	10.7851	10.9325	10.7814	10.7887	10.9254	11.0167	11.0066	10.9783
ENSMUSG00000025907	0.158863	0.287715	0.182671	0.817711	0.293718	0.346903	n	1		ME	8.92001	8.94817	8.99772	8.69932	8.7161	8.94464	8.80189	8.46608	8.96626	8.78805	8.53943	7.84525
ENSMUSG00000025916	0.709394	0.212813	0.49661	0.117763	0.69445	0.128981	n	1		ME	9.45316	9.75438	9.84954	9.5396	9.92806	9.78738	9.3032	9.53598	9.55897	9.52037	9.97563	10.0065
ENSMUSG00000025931	0.376972	0.047943	0.107734	0.462609	0.147943	0.229933	n	1		ME	7.12144	7.13688	7.15502	7.11816	7.1796	7.35114	7.21128	7.30919	7.326	7.63063	7.6376	7.24051
ENSMUSG00000025963	0.0105781	0.0322885	0.00257112	0.994416	0.037115	0.0670001	n	1		ME	10.4238	10.5544	10.5257	10.1993	10.3175	10.2657	10.1459	10.324	10.3141	9.97667	10.1234	10.1157
ENSMUSG00000025977	0.29011	0.263321	0.137314	0.863509	0.563141	0.7387	n	1		ME	9.56041	9.99573	9.90612	9.85048	10.0092	10.2461	9.83771	10.0574	10.3088	10.1734	10.2461	9.95938
ENSMUSG00000026000	0.384437	0.31728	0.737438	0.932031	0.526941	0.491723	n	1		ME	11.138	11.0429	11.0531	11.1958	11.1754	11.0375	11.1754	11.1544	11.0622	11.1611	11.0593	11.0622
ENSMUSG00000026017	0.155408	0.0693234	0.891947	0.242791	0.153607	0.0639487	n	1		ME	7.06886	7.45862	7.39229	6.88488	7.12373	7.12659	6.42844	6.85398	7.00849	7.09059	7.35704	7.55014
ENSMUSG00000026018	0.0772545	0.0169176	9.49004e-05	0.605211	0.0547952	0.00287516	n	1		ME	8.4478	8.56927	8.57063	8.69472	9.0675	9.14759	8.75132	8.91373	8.97619	9.40216	9.50617	9.55144
ENSMUSG00000026049	0.00225853	0.00391983	0.367327	0.107544	0.00958209	0.00298735	n	1		ME	11.2868	11.3348	11.3312	11.4673	11.488	11.5321	11.5213	11.5672	11.6193	11.2709	11.2234	11.3394
ENSMUSG00000026063	0.139314	0.141252	0.182596	0.957586	0.516001	0.536802	n	1		ME	7.23801	7.46134	7.63372	6.88128	7.343	7.1317	6.84112	7.32362	7.15821	6.40111	6.84416	7.40233
ENSMUSG00000026095	0.00434727	0.00183612	0.00161955	0.210053	0.060456	0.330735	n	1		ME	11.7812	11.8492	11.8154	11.5985	11.6362	11.6773	11.6296	11.5506	11.5877	11.5506	11.5506	11.5789
ENSMUSG00000026096	0.0013668	0.00125023	0.000947903	0.957349	0.00163512	0.0017313	n	1		ME	8.76305	8.98362	9.04416	7.79634	8.02506	8.0778	7.79292	8.05274	8.03302	4.53106	3.72194	4.28707
ENSMUSG00000026125	0.720203	0.0384255	0.235248	0.0582616	0.108268	0.0165116	n	1		ME	11.7545	11.7029	11.639	11.7066	11.6564	11.6899	11.6031	11.4953	11.4418	11.7791	11.7029	11.8038
ENSMUSG00000026153	0.039303	0.0722948	0.000959558	0.406869	0.00459073	0.0738927	n	1		ME	9.62591	9.74794	9.72008	9.78649	9.87976	9.92213	9.79028	10.0056	10.0555	10.1167	10.2169	10.2595
ENSMUSG00000026163	0.00449893	0.0114379	0.0002757	0.665608	0.00154506	0.00150448	n	1		ME	9.85167	10.1724	10.185	8.90029	9.26036	9.25016	8.93557	9.34659	9.39093	7.35663	7.73942	7.82735
ENSMUSG00000026173	0.00701797	0.0151849	0.14358	0.0357762	0.131049	0.00911292	y	1	lower	ME	10.2605	10.258	10.2509	10.0555	10.0826	10.0188	9.87221	9.80802	9.67125	10.1075	10.1137	10.2416
ENSMUSG00000026182	0.158852	0.643405	0.108819	0.258077	0.743646	0.158522	n	1		ME	13.2125	13.1237	13.1237	13.2125	13.261	13.183	13.2125	13.183	13.1237	13.2125	13.2125	13.261
ENSMUSG00000026196	0.0786544	0.0841246	0.0161985	0.322272	0.0919939	0.0475182	n	1		ME	5.97651	5.9439	6.12528	6.35312	6.11441	6.44143	6.14364	6.15465	6.22967	6.59122	6.46067	6.83739
ENSMUSG00000026200	0.0299745	0.00425708	0.0936504	0.0460045	0.380915	0.648142	y	1	lower	ME	8.96443	8.83189	8.77436	8.5888	8.33552	8.58174	8.3279	8.10418	8.04269	8.58455	8.34084	7.8889
ENSMUSG00000026203	0.170297	0.062031	0.0491468	0.393996	0.297111	0.817011	n	1		ME	10.4749	10.3356	10.2496	10.3211	10.1002	10.1768	10.2169	10.1292	9.98203	10.1974	9.95705	10.1012
ENSMUSG00000026239	0.880618	0.312058	0.438309	0.330193	0.475913	0.726442	n	1		ME	9.81216	9.84685	9.84685	9.82043	9.89868	9.80249	9.82776	10.1157	9.90708	9.94864	10.0115	9.76193
ENSMUSG00000026254	0.467333	0.0410829	0.391633	0.0520783	0.995644	0.0306583	n	1		ME	9.43001	9.35519	9.37145	9.42342	9.35202	9.50516	9.26728	9.32575	9.22497	9.43001	9.36369	9.4879
ENSMUSG00000026331	0.401915	0.688666	0.458743	0.670582	0.161732	0.302155	n	1		ME	10.7385	10.8953	10.9584	10.6451	10.8953	10.7775	10.6699	10.9133	10.8791	10.8201	11.0429	10.9555
ENSMUSG00000026336	0.0257315	0.00790868	0.00205376	0.151755	0.0045543	0.0231211	n	1		ME	9.31219	9.56191	9.54586	9.72629	9.9463	9.84516	9.87621	10.1125	10.0281	10.2332	10.3816	10.3677
ENSMUSG00000026401	0.438814	0.447636	0.647291	0.93742	0.646932	0.670774	n	1		ME	10.5651	10.9614	11.048	10.7626	11.1919	11.138	10.8183	11.0227	11.2073	10.7522	11.0146	11.0755
ENSMUSG00000026429	0.208319	0.122034	0.262832	0.468811	0.0829558	0.0490421	n	1		ME	10.0083	10.185	10.1993	10.1225	10.3712	10.3689	10.1768	10.5012	10.5198	9.72705	10.0499	10.0848
ENSMUSG00000026495	0.00321663	0.321728	0.0596511	0.114172	0.20133	0.0692747	n	1		ME	10.9475	10.9783	10.9572	11.0547	11.0641	11.0973	10.943	11.0414	11.0127	11.1009	11.1426	11.2892
ENSMUSG00000026504	0.562238	0.307519	0.835978	0.0999061	0.405593	0.360425	n	1		ME	8.17184	8.34986	8.39789	8.2706	8.35325	8.46439	8.12575	8.23712	8.26503	8.20651	8.24846	8.40403
ENSMUSG00000026546	0.0302502	0.0331613	0.499872	0.702706	0.146766	0.116821	n	1		ME	10.5315	10.3955	10.3566	10.2689	10.1292	10.205	10.2837	10.1497	10.0801	10.3946	10.2214	10.4659
ENSMUSG00000026567	0.972496	0.0120274	0.014287	0.0662155	0.0184249	0.00905921	n	1		ME	10.4543	10.5238	10.5483	10.4645	10.6252	10.4438	10.3124	10.3175	10.2872	10.7067	10.8555	10.8733
ENSMUSG00000026578	0.0850285	0.0471777	0.484352	0.435174	0.817026	0.527935	n	1		ME	10.9221	10.982	10.9059	10.9074	10.8386	10.8154	10.8276	10.8672	10.7539	10.7922	10.8099	11.0192
ENSMUSG00000026594	0.0297116	0.00940123	0.0179663	0.11649	0.471211	0.0483864	n	1		ME	9.60444	9.59356	9.57787	9.83122	9.72434	9.74014	9.66751	9.66991	9.71015	9.86145	9.75165	9.79279
ENSMUSG00000026605	0.976991	0.872867	0.0432621	0.884333	0.025807	0.00392799	n	1		ME	8.3844	8.12853	8.03302	8.22393	8.30317	8.00617	8.18847	8.23908	8.05668	8.67542	8.52631	8.5855
ENSMUSG00000026623	0.846105	0.43345	0.208452	0.437831	0.221369	0.519752	n	1		ME	8.97797	8.78364	8.74469	8.86173	8.78805	8.8076	8.88486	8.60744	8.73209	8.84116	8.52707	8.59113
ENSMUSG00000026683	0.014841	0.0986246	0.00801163	0.405426	0.0605489	0.0337105	n	1		ME	8.26393	8.45988	8.43855	8.64516	8.88857	8.81182	8.47825	8.83545	8.67617	8.92801	9.2096	9.28981
ENSMUSG00000026696	0.262431	0.131465	0.12341	0.579898	0.269746	0.360381	n	1		ME	8.95778	9.06537	9.11915	8.88763	9.01499	8.99652	8.88128	8.9555	8.97358	8.69621	8.78805	9.00359
ENSMUSG00000026721	0.174339	0.612437	0.0228773	0.259969	0.069698	0.0340024	n	1		ME	6.86933	6.74823	6.86663	6.84323	7.00584	6.94358	6.81077	6.9106	6.84492	7.06024	7.08194	7.26617
ENSMUSG00000032908	0.0576187	0.0196892	0.347613	0.0444052	0.213564	0.0155059	y	1	lower	ME	7.26617	7.29754	7.34828	6.81286	7.05393	6.62529	6.05141	6.54829	6.08274	6.82675	7.21237	7.32362
ENSMUSG00000033124	0.434105	0.229946	0.250029	0.60253	0.312832	0.382887	n	1		ME	10.5562	10.2354	10.2714	10.3551	9.75165	10.3488	10.3769	9.61471	9.95938	10.2071	9.537	7.64897
ENSMUSG00000033701	0.000819789	0.00175471	0.000482879	0.688694	0.139358	0.099006	n	1		ME	9.75785	9.79279	9.85415	10.1962	10.1863	10.2944	10.1339	10.205	10.2703	10.3727	10.2496	10.3309
ENSMUSG00000036962	0.00426313	0.00806588	0.0235505	0.0539993	0.576095	0.0324046	n	1		ME	8.56862	8.67825	8.73841	8.19996	8.29531	8.32438	8.02318	7.96213	7.68235	8.18335	8.42652	8.36363
ENSMUSG00000037395	0.713672	0.705442	0.368874	0.595036	0.330294	0.472621	n	1		ME	9.4429	9.40113	9.40952	9.51052	9.33649	9.47476	9.51535	9.19187	9.4203	9.45985	9.30996	8.84615
ENSMUSG00000038179	0.0737112	0.0241181	0.220361	0.0847951	0.043946	0.0102541	n	1		ME	6.39391	6.29175	6.40363	6.21309	5.87789	6.07823	5.90978	5.48899	5.68939	6.91599	6.60041	6.38158
ENSMUSG00000038866	0.141744	0.0304545	0.454264	0.421332	0.315908	0.0720116	n	1		ME	9.76985	9.6465	9.59247	9.58376	9.56686	9.36111	9.46964	9.4837	9.31605	9.60746	9.51463	9.70036
ENSMUSG00000038936	0.394163	0.915717	0.36412	0.376184	0.983821	0.314871	n	1		ME	11.8013	11.9293	11.9396	11.7707	11.8714	11.8681	11.8323	11.8714	11.9475	11.8038	11.8681	11.8408
ENSMUSG00000039210	0.00386894	0.985283	0.59267	0.0936447	0.0833064	0.665621	n	1		ME	7.87551	7.90188	7.921	8.07315	8.06517	8.07634	7.90846	7.99199	7.79429	7.92745	7.91965	7.72516
ENSMUSG00000039224	0.278461	0.0550757	0.863024	0.564096	0.252266	0.0536686	n	1		ME	10.674	10.7573	10.7673	10.5562	10.5902	10.7655	10.6052	10.5076	10.6511	10.764	10.6688	10.7922
ENSMUSG00000040265	0.00759707	0.0153981	0.310826	0.176869	0.465566	0.585051	n	1		ME	7.00849	6.92636	7.06523	6.75149	6.66809	6.77862	6.71274	6.58932	6.45462	6.86793	6.71989	5.01626
ENSMUSG00000040629	0.470209	0.914186	0.241302	0.377234	0.442496	0.179341	n	1		ME	12.3916	12.6187	12.6904	12.3804	12.5803	12.4797	12.43	12.6013	12.7112	12.352	12.43	12.4797
ENSMUSG00000041809	0.00710288	0.00270338	0.0078939	0.592756	0.069645	0.0582458	n	1		ME	11.4643	11.5776	11.615	11.157	11.1901	11.1329	11.1009	11.2001	11.1165	11.2258	11.218	11.3098
ENSMUSG00000042708	0.288986	0.0416418	0.790325	0.197941	0.181276	0.0259514	n	1		ME	11.4569	11.6411	11.6193	11.5506	11.7457	11.7374	11.7171	11.8013	11.9029	11.5027	11.5854	11.5734
ENSMUSG00000046337	0.723597	0.948728	0.549996	0.752489	0.511739	0.544152	n	1		ME	9.22338	8.81715	8.85093	9.29843	8.70414	9.14136	9.18189	8.78615	8.95904	9.61261	8.87349	6.14775
ENSMUSG00000047021	0.514864	0.546815	0.895506	0.256589	0.593236	0.462759	n	1		ME	9.91233	9.64892	9.51614	9.77324	9.30509	9.61261	9.84516	9.73224	9.755	9.69857	9.44988	9.85906
ENSMUSG00000053153	0.0542435	0.311037	0.0138348	0.478353	0.115985	0.0798243	n	1		ME	9.35065	9.47205	9.50244	9.06468	9.29602	9.24349	9.09827	9.44392	9.36024	8.84815	8.989	9.1255
ENSMUSG00000053161	0.599723	0.976921	0.00175174	0.735129	0.00243463	0.0365508	n	1		ME	7.96742	8.05882	8.17924	7.87512	8.12169	8.04564	7.86421	8.34403	8.01193	8.58229	8.71121	8.76356
ENSMUSG00000057173	0.00731739	0.0646538	0.0279034	0.67199	0.00116167	0.0206974	n	1		ME	9.435	9.42457	9.34051	9.16355	9.19187	9.24511	9.02146	9.2465	9.22428	9.60008	9.49424	9.5396
ENSMUSG00000060715	0.482119	0.136859	0.320631	0.297179	0.732163	0.421745	n	1		ME	10.9978	11.3394	11.3461	11.1516	11.4271	11.4545	11.3381	11.525	11.6411	11.2234	11.4974	11.4545
ENSMUSG00000060985	0.00551743	0.399299	0.22451	0.0129572	0.644737	0.260144	n	1		ME	9.20807	9.17889	9.263	9.38582	9.36968	9.44392	9.23702	9.23394	9.25813	9.34304	9.31478	9.79182
ENSMUSG00000062590	0.353819	0.0335746	0.285845	0.0606954	0.429616	0.618985	n	1		ME	7.49794	7.3741	7.4198	7.43963	7.28245	7.3844	7.22826	7.19361	7.0071	7.4684	7.23751	6.98283
ENSMUSG00000070732	0.861889	0.709135	0.453514	0.848708	0.54452	0.639294	n	1		ME	8.84446	9.20229	9.23702	8.91608	9.36024	9.10743	8.94311	9.2062	9.34051	8.94661	9.45823	9.38814
ENSMUSG00000070738	0.464399	0.0221338	0.0723838	0.138597	0.0800807	0.207347	n	1		ME	8.86253	8.81827	8.76873	8.71936	8.64141	8.88857	8.67891	8.53444	8.53281	8.50527	8.42059	8.02857
ENSMUSG00000072295	0.721554	0.846266	0.902844	0.595103	0.78136	0.74752	n	1		ME	9.29018	9.73416	9.76564	9.31818	9.62765	9.6296	9.34051	9.64568	9.94864	9.37404	9.5625	9.77791
ENSMUSG00000073633	0.092414	0.886573	0.794802	0.292746	0.787713	0.757958	n	1		ME	10.1594	10.1472	10.1255	10.2222	10.2313	10.1613	10.1147	10.2287	10.0649	10.3031	10.2416	9.97667
ENSMUSG00000073704	0.352778	0.848762	0.264804	0.383206	0.74447	0.287274	n	1		ME	11.1453	10.6339	10.6379	11.3139	10.7626	11.0755	11.1023	10.6873	10.7579	11.5068	10.8655	11.0414
ENSMUSG00000079429	0.883935	0.990376	0.0245671	0.90114	0.0345317	0.0281638	n	1		ME	8.37902	8.30221	8.30221	8.43002	8.40707	8.18609	8.23412	8.47554	8.2706	8.62031	8.58229	8.79802
ENSMUSG00000003134	0.0451596	0.303621	0.0214286	0.103443	0.104532	0.0416245	n	1			6.90869	6.90869	6.73744	6.68735	6.46482	6.63426	6.7334	6.83883	6.7394	6.40827	6.09615	6.43379
ENSMUSG00000003135	0.157154	0.878296	0.00633001	0.132779	0.0105425	0.00591281	n	1			8.91373	8.99534	8.9896	8.90489	8.86309	8.94541	8.92317	8.97797	9.01595	8.46698	8.46025	8.63015
ENSMUSG00000003464	0.340674	0.0322447	0.243358	0.403265	0.643547	0.866874	n	1			7.75815	7.69687	7.58299	7.97859	7.75062	7.66692	7.97095	7.90846	7.81919	8.07405	7.89773	7.655
ENSMUSG00000003721	0.210011	0.192577	0.142731	0.092416	0.832442	0.0584304	n	1			9.17685	9.2076	9.20084	9.03818	9.20438	9.06138	9.19292	9.27853	9.26149	8.99165	9.11862	9.14594
ENSMUSG00000004364	0.137457	0.276537	0.116187	0.916367	0.656757	0.697353	n	1			11.3848	11.4852	11.4829	11.4953	11.547	11.6723	11.5579	11.4418	11.7504	11.535	11.4918	11.5985
ENSMUSG00000004768	0.00697617	0.00614259	0.0288795	0.158201	0.341232	0.870495	n	1			7.70762	7.83321	7.83488	7.32498	7.51654	7.40857	7.13236	7.38178	7.2566	7.06383	7.38961	7.38557
ENSMUSG00000005501	0.320843	0.0548591	0.0173554	0.431074	0.141897	0.167694	n	1			7.20879	6.92772	6.94767	7.07846	6.61995	6.83058	6.84947	6.68124	6.58484	6.53158	6.46822	6.63519
ENSMUSG00000005674	0.140281	0.0594573	0.423559	0.276208	0.729388	0.243455	n	1			5.69446	5.57907	5.58575	5.60369	5.42439	5.42439	5.33247	5.50532	5.24131	5.65584	5.34646	5.57431
ENSMUSG00000005886	0.376152	0.0784307	0.635308	0.182924	0.227767	0.0566298	n	1			8.42006	8.5888	8.59536	8.48952	8.73841	8.65575	8.74163	8.72187	9.03411	8.37385	8.53122	8.57123
ENSMUSG00000006005	0.0003651	0.0291103	0.0410188	0.804002	0.206653	0.387333	n	1			8.26847	8.20532	8.20358	8.60814	8.53122	8.57831	8.53652	8.4478	8.67542	8.5607	8.48196	8.35971
ENSMUSG00000006299	0.993916	0.857269	0.709615	0.85412	0.708558	0.783832	n	1			11.6682	11.1474	11.088	11.5949	11.03	11.2727	11.5672	11.1516	11.0445	11.7545	11.1453	10.5061
ENSMUSG00000006304	0.798411	0.488015	0.317994	0.564883	0.212113	0.186354	n	1			11.3115	11.0213	11.0213	11.2745	11.0531	11.1231	11.547	11.0127	11.2216	11.1689	10.8029	10.875
ENSMUSG00000010290	0.654524	0.699687	0.250519	0.897758	0.559447	0.429905	n	1			7.82936	7.90255	7.7467	7.92412	8.02198	7.69308	7.74875	8.0029	7.83693	7.8169	7.95882	8.11024
ENSMUSG00000010453	0.624153	0.918386	0.22663	0.542092	0.555159	0.136937	n	1			9.84516	9.5694	9.47205	9.75438	9.28202	9.56775	9.78209	9.4879	9.66285	9.56191	9.29843	9.43329
ENSMUSG00000013973	0.135431	0.0220872	0.501924	0.307715	0.269899	0.0460804	n	1			8.84919	8.81944	8.7437	8.53737	8.45291	8.7676	8.47036	8.31684	8.55539	8.88314	8.62755	8.71278
ENSMUSG00000013997	0.281815	0.281749	0.00847024	0.695162	0.00274989	0.0125374	n	1			8.69993	8.67943	8.59999	8.61363	8.64889	8.5761	8.55801	8.67943	8.53737	8.98468	8.97584	8.97447
ENSMUSG00000014602	0.402464	0.801339	0.109249	0.270813	0.159868	0.0735866	n	1			7.14873	6.66037	6.55397	7.18973	6.80116	6.98952	7.0531	6.64946	6.45564	7.44405	7.10824	7.20654
ENSMUSG00000015222	0.840596	0.00291886	0.0147773	0.000499794	0.0202676	0.00521028	y	1	lower		7.3844	7.45095	7.51694	7.39581	7.47245	7.45485	7.11432	7.12924	7.05159	7.74058	7.89738	7.99691
ENSMUSG00000015961	0.822285	0.134107	0.0687269	0.149622	0.0844781	0.392579	n	1			9.59785	9.72196	9.64437	9.62011	9.68706	9.68806	9.6737	9.81399	9.82776	9.77099	9.80249	9.97073
ENSMUSG00000018189	0.163114	0.265343	0.00499489	0.644811	0.0289329	0.0128745	n	1			10.1656	10.3453	10.2931	10.0083	10.2158	10.1594	10.0801	10.1581	10.2689	9.78867	9.89868	9.87705
ENSMUSG00000019699	0.0140324	0.636711	0.0929777	0.0426304	0.00419294	0.131563	n	1			6.78567	6.69655	6.71592	6.93047	6.95273	7.07605	6.8764	6.68185	6.74048	6.6792	6.65412	6.56072
ENSMUSG00000023150	0.65262	0.272204	0.553634	0.354774	0.826786	0.414615	n	1			9.5883	10.0281	10.0012	9.80484	10.0801	9.97563	9.89613	10.109	10.3566	9.83771	10.0339	10.064
ENSMUSG00000025903	0.147038	0.147265	0.107892	0.68621	0.995498	0.628191	n	1			8.93059	9.14639	9.27311	9.16671	9.56775	9.46432	9.23238	9.329	9.45543	9.2148	9.46964	9.51158
ENSMUSG00000025911	0.0195126	0.515261	0.433253	0.0235943	0.520361	0.588171	n	1			5.57431	5.82154	5.78852	5.23839	5.40517	5.39592	5.65977	5.53956	5.76714	5.25771	5.34327	5.9439
ENSMUSG00000025912	0.0133868	0.0304831	0.00359444	0.717935	0.0992224	0.0806732	n	1			6.36403	6.80772	6.65698	7.18836	7.4696	7.70142	7.09685	7.29376	7.69923	7.65216	7.90367	8.20532
ENSMUSG00000025915	0.436911	0.160258	0.48917	0.100581	0.750879	0.127233	n	1			7.80306	8.01253	7.93847	7.69004	7.88725	7.92814	8.03516	8.13193	8.5233	7.82735	7.83321	7.92963
ENSMUSG00000025917	0.602969	0.26339	0.664223	0.462618	0.836997	0.855888	n	1			11.1494	11.2375	11.3011	11.177	11.3214	11.2953	11.2132	11.399	11.3571	11.3667	11.4714	11.048
ENSMUSG00000025925	0.00624658	0.0510921	0.00204471	0.0294498	0.0887874	0.00592642	y	1	intermediate		7.65659	7.9327	7.9327	8.34986	8.50191	8.60151	8.0968	8.10959	8.28494	8.57761	8.75321	8.84815
ENSMUSG00000025935	0.18044	0.673706	0.0449677	0.220389	0.0913086	0.149083	n	1			10.1196	10.1105	10.1147	10.0695	10.0772	9.95138	10.1211	10.0591	10.1314	10.1507	10.1384	10.1701
ENSMUSG00000025939	0.198086	0.563809	0.249621	0.514239	0.886646	0.515449	n	1			9.13744	9.3266	9.4203	9.02888	9.23317	9.14036	9.02746	9.28834	9.33046	8.91608	9.17625	9.25535
ENSMUSG00000025940	0.188098	0.0989909	0.0102461	0.478071	0.0202609	0.0641233	n	1			8.24059	8.44584	8.53	8.48399	8.69568	8.55179	8.49754	8.73398	8.73841	8.80398	8.93059	9.04205
ENSMUSG00000025949	0.0668845	0.189301	0.0322374	0.0697851	0.243107	0.0972316	n	1			6.2172	5.99664	6.01806	6.31706	6.35062	6.27988	6.15127	6.21206	6.2688	6.29494	6.4912	6.61524
ENSMUSG00000025962	0.157562	0.102061	0.0932415	0.476998	0.295548	0.628002	n	1			7.47522	7.66017	7.7276	7.26071	7.5602	7.43963	7.07101	7.35575	7.4798	6.90723	7.26189	7.42858
ENSMUSG00000025968	0.706799	0.176881	0.152372	0.167474	0.11871	0.445732	n	1			9.68932	9.72494	9.66198	9.62104	9.73416	9.67478	9.69356	9.78867	9.76912	9.72122	9.78738	9.89395
ENSMUSG00000025971	0.803531	0.597072	0.440243	0.759571	0.612491	0.874625	n	1			8.05494	8.16864	8.311	7.98199	8.28131	8.38598	7.96807	8.39743	8.48112	8.11195	8.2584	8.58295
ENSMUSG00000025982	0.331045	0.166562	0.125727	0.390422	0.582096	0.559191	n	1			9.2288	9.4203	9.4657	9.34659	9.62225	9.50423	9.51052	9.51208	9.9093	9.448	9.62367	9.575
ENSMUSG00000025986	0.336252	0.799838	0.515877	0.593021	0.19993	0.514	n	1			8.46303	8.69202	8.64794	8.16427	8.57761	8.54698	8.23346	8.6562	8.76526	8.48646	8.82933	8.75992
ENSMUSG00000025995	0.389743	0.981026	0.197612	0.338873	0.0731102	0.184878	n	1			8.2855	8.60151	8.59897	8.16864	8.42445	8.48112	8.35684	8.4833	8.6562	8.50389	8.82618	8.92001
ENSMUSG00000026004	0.849406	0.650588	0.947518	0.779951	0.85487	0.697044	n	1			6.94298	7.16064	7.2156	6.83058	7.20931	7.18836	6.74781	6.98952	7.30765	6.77926	7.12743	7.45862
ENSMUSG00000026020	0.763362	0.695683	0.968013	0.820138	0.862917	0.781807	n	1			9.58376	9.19851	8.94817	9.36787	9.17782	9.38229	9.80592	8.93617	9.3843	10.0401	9.10093	8.52631
ENSMUSG00000026027	0.335813	0.285902	0.962376	0.998361	0.406142	0.371627	n	1			7.69753	7.95805	8.05805	7.84364	8.23154	8.16768	7.92681	8.06334	8.25371	7.64897	7.99874	8.09196
ENSMUSG00000026034	0.711543	0.159221	0.885132	0.136262	0.722943	0.24751	n	1			7.861	8.20827	8.13154	7.95421	8.12607	7.97605	8.11285	8.55353	8.79928	7.70762	8.22393	8.3768
ENSMUSG00000026037	0.177481	0.142283	0.0481375	0.663869	0.864268	0.525001	n	1			7.72098	7.70588	7.74466	7.73225	7.80169	7.86308	7.77775	7.91617	7.78571	7.76049	7.78781	7.82512
ENSMUSG00000026048	0.0159568	0.186243	0.00338996	0.889688	0.272851	0.517906	n	1			7.75542	7.54371	7.54597	7.30623	7.16776	7.01076	7.60353	7.12615	6.86189	6.93108	7.00849	7.1392
ENSMUSG00000026082	0.606178	0.570372	0.0744267	0.77645	0.0929594	0.100467	n	1			8.06947	8.22654	8.22776	8.14819	8.28327	8.20297	8.08359	8.23154	8.41764	8.41417	8.57761	8.91124
ENSMUSG00000026083	0.280786	0.53137	0.0352831	0.538395	0.172709	0.0615269	n	1			8.9555	8.74041	8.73398	9.08706	8.74712	9.21566	9.07774	8.71433	8.90295	9.4309	9.07705	9.48694
ENSMUSG00000026094	0.0143313	0.0186845	0.00675275	0.769645	0.00933334	0.00907645	n	1			8.58075	8.79518	8.76408	8.21359	8.44584	8.29329	8.21197	8.40486	8.42652	6.43797	5.52033	5.7745
ENSMUSG00000026102	0.0861034	0.0770146	0.297854	0.0227773	0.0777159	0.31932	n	1			8.54551	8.51742	8.62818	8.68121	8.83251	8.65235	8.40486	8.31158	8.08231	8.22336	8.53444	8.51455
ENSMUSG00000026111	0.603924	0.309453	0.286069	0.522269	0.208564	0.120711	n	1			9.29702	9.25768	9.26453	9.33929	9.34532	9.21414	9.34304	9.45213	9.25461	9.13521	9.1255	9.3061
ENSMUSG00000026112	0.000137398	0.17356	0.011679	0.0557324	0.325062	0.019928	n	1			6.78471	6.80819	6.79859	7.30132	7.355	7.33089	7.06886	7.07164	6.80342	7.50546	7.4696	7.28129
ENSMUSG00000026123	0.0218843	0.0224745	0.00826666	0.199517	0.577106	0.306974	n	1			7.0526	7.17549	7.19001	6.85031	6.98283	6.79918	6.74823	6.84492	6.55189	6.91923	6.81806	6.76573
ENSMUSG00000026127	0.0111488	0.0029233	0.00531859	0.109688	0.0499482	0.0117007	n	1			8.11079	8.09582	8.09505	8.40952	8.42312	8.32028	8.27735	8.33053	8.29913	8.4556	8.51101	8.56862
ENSMUSG00000026131	0.316076	0.306343	0.434411	0.893277	0.154474	0.120444	n	1			7.86895	7.55124	7.56779	7.54769	7.13739	7.64665	7.48443	7.25161	7.68141	7.91295	7.63949	7.77649
ENSMUSG00000026134	0.0112992	0.00276118	0.0589023	0.00488032	0.669896	0.195817	y	1	higher		6.69416	6.78865	6.91516	7.14591	7.2612	7.12743	7.45556	7.55396	7.47245	7.00849	7.2612	7.46566
ENSMUSG00000026135	0.53769	0.909014	0.111403	0.347007	0.0482883	0.0255094	n	1			5.601	5.31715	5.35724	5.54172	5.45737	5.47528	5.48243	5.47669	5.35302	5.73273	5.6274	5.58575
ENSMUSG00000026142	0.850504	0.091515	0.496878	0.068483	0.394358	0.0781722	n	1			7.29754	7.64478	7.56454	7.43547	7.53157	7.47117	7.03709	7.31985	7.24379	7.35915	7.69412	7.8657
ENSMUSG00000026150	0.00362813	0.0114931	0.271968	0.492896	0.436787	0.408774	n	1			10.2214	10.5183	10.5851	9.35744	9.66882	9.55644	9.40656	9.67843	9.86973	4.48045	9.48624	9.68932
ENSMUSG00000026154	0.00614853	0.0280247	0.969191	0.700993	0.0115777	0.0141008	n	1			9.51291	9.50244	9.54378	9.80317	9.93013	9.87493	9.77324	10.0103	9.92401	9.40323	9.54473	9.60331
ENSMUSG00000026159	0.424619	0.457478	0.941314	0.948069	0.516489	0.529236	n	1			9.70408	9.91233	9.92569	9.64437	9.84332	9.80317	9.60008	9.78132	9.88778	9.6947	9.83211	9.9891
ENSMUSG00000026171	0.165597	0.0667445	0.0663005	0.4558	0.409522	0.914609	n	1			9.11862	9.23317	9.29258	8.94873	8.34031	9.01153	8.70806	8.12575	8.74163	8.89681	8.3733	8.20651
ENSMUSG00000026174	0.182797	0.321076	0.00133753	0.695578	0.313757	0.196055	n	1			8.32388	8.31158	8.26917	8.49509	8.42701	8.30614	8.35397	8.48399	8.29003	8.49754	8.45222	8.49888
ENSMUSG00000026187	0.0187611	0.0309035	0.0505792	0.680964	0.184876	0.148455	n	1			6.70097	6.74354	6.81286	6.40532	6.39308	6.16698	6.321	6.53371	6.26118	5.58575	5.98939	6.25955
ENSMUSG00000026198	0.308365	0.789477	0.182098	0.367074	0.696404	0.215693	n	1			8.84853	8.73776	8.81466	8.80979	8.59377	8.73546	8.81182	8.72967	8.82184	8.64219	8.58393	8.79928
ENSMUSG00000026201	0.0259299	0.0110594	0.0712924	0.368216	0.446009	0.828639	n	1			8.67039	8.59686	8.56384	8.4946	8.34235	8.38852	8.26847	8.33872	8.42445	8.42701	8.39228	8.14087
ENSMUSG00000026209	0.0977613	0.0299504	0.810903	0.184019	0.0240211	0.0107257	n	1			10.286	10.472	10.56	10.5851	10.7551	10.629	10.6782	10.894	10.7873	10.3516	10.4999	10.3946
ENSMUSG00000026219	0.115062	0.0272395	0.114796	0.0849458	0.808144	0.0779607	n	1			9.53131	9.52652	9.47049	9.56191	9.54657	9.56847	9.69857	9.59924	9.71259	9.5883	9.57852	9.52652
ENSMUSG00000026229	0.491811	0.286278	0.614869	0.810972	0.766581	0.53283	n	1			9.52418	9.2622	9.26817	9.72927	9.25319	9.44852	9.73531	9.3993	9.4309	9.61697	9.34902	9.30232
ENSMUSG00000026240	0.879303	0.185477	0.189923	0.206402	0.218979	0.691573	n	1			7.98081	7.82735	7.77954	7.96213	7.81868	7.76592	7.83535	7.65468	7.44647	7.80103	7.76276	7.5495
ENSMUSG00000026245	0.990815	0.86848	0.696779	0.889014	0.721178	0.80612	n	1			8.8255	9.03261	9.08706	8.90067	9.17625	8.87288	8.83471	9.13744	9.03633	8.80836	9.15245	9.16355
ENSMUSG00000026248	0.118153	0.276244	0.134152	0.842146	0.812459	0.982925	n	1			6.95273	7.10292	7.15821	7.11913	7.37949	7.31848	7.01462	7.34499	7.36839	7.12703	7.24251	7.36772
ENSMUSG00000026255	0.059273	0.0101227	0.0658709	0.00986617	0.63169	0.00833754	y	1	higher		11.8752	11.9952	11.9252	12.0438	12.041	12.0784	12.1864	12.128	12.1716	12.0623	12.0587	12.0097
ENSMUSG00000026260	0.50863	0.981411	0.157262	0.583607	0.40036	0.239739	n	1			9.70174	9.41057	9.40479	9.60444	9.21046	9.37404	9.75438	9.23158	9.54473	9.46678	9.10164	9.16878
ENSMUSG00000026269	0.444468	0.461414	0.268612	0.243618	0.172881	0.933989	n	1			8.85764	8.68919	8.58455	9.10267	8.64219	8.79589	8.87772	8.37966	8.42259	8.70669	8.47928	8.54115
ENSMUSG00000026270	0.619551	0.493964	0.232361	0.986685	0.271686	0.274489	n	1			7.37949	7.16341	7.12587	7.32081	6.91923	7.19617	7.28245	7.04944	7.09685	7.16996	6.66562	5.76807
ENSMUSG00000026273	0.300021	0.11756	0.075404	0.808805	0.565019	0.658297	n	1			7.95805	8.02857	7.99234	7.6116	8.00713	7.87768	7.67731	7.94142	7.76818	7.60214	7.86817	7.76007
ENSMUSG00000026275	0.543647	0.128718	0.0383865	0.21361	0.164621	0.777239	n	1			9.97486	9.86472	9.85481	9.86768	9.95233	9.70854	9.66198	9.82696	9.46844	9.58283	9.72705	9.75576
ENSMUSG00000026277	0.00360271	0.00415062	0.013281	0.733589	0.00744968	0.00748236	n	1			9.60008	9.67666	9.65739	10.2675	10.1452	10.3381	10.2689	10.1822	10.3901	9.85415	9.81774	9.95138
ENSMUSG00000026279	0.121619	0.128632	0.0599561	0.988645	0.0448167	0.0493319	n	1			10.2169	10.2233	10.2275	10.204	10.109	10.1364	10.205	10.1052	10.1374	10.2821	10.2469	10.2543
ENSMUSG00000026281	0.0357985	0.131944	0.0168556	0.198131	0.288969	0.0506694	n	1			9.41962	9.4879	9.55316	8.99307	9.27311	9.17157	9.1936	9.44852	9.3061	8.8394	9.03411	9.13024
ENSMUSG00000026283	0.230831	0.0231952	0.00811059	0.0608784	0.0082625	0.844903	n	1			7.01707	6.78922	6.8641	6.77527	6.83401	6.72315	6.59398	6.44876	6.25427	6.55189	6.3898	6.42578
ENSMUSG00000026288	0.313764	0.328134	0.0196579	0.130885	0.0261872	0.00829523	n	1			6.13881	6.05417	6.18764	6.31241	6.29494	6.07925	6.03728	6.15392	5.91853	6.85031	6.63426	6.51717
ENSMUSG00000026309	0.152032	0.0891976	0.524231	0.989949	0.589413	0.564556	n	1			7.72516	7.81519	7.80992	7.60714	7.41391	7.72938	7.58604	7.45695	7.70275	7.80011	7.41158	7.82802
ENSMUSG00000026311	0.714308	0.534604	0.177367	0.449792	0.449658	0.17399	n	1			8.59249	8.60413	8.58119	8.65984	8.69932	8.49712	8.55438	8.65439	8.41184	8.63303	8.64438	8.77262
ENSMUSG00000026313	0.57551	0.956834	0.785091	0.591317	0.841862	0.814085	n	1			6.45016	6.43218	6.18009	6.39672	6.1593	6.3024	6.46698	6.19817	6.37694	6.52418	6.16985	6.24692
ENSMUSG00000026319	0.203218	0.298485	0.720729	0.945891	0.170341	0.239211	n	1			5.86371	5.99754	5.99548	5.96676	6.07665	6.21876	5.99073	5.99548	6.30359	5.78505	5.98175	5.99548
ENSMUSG00000026333	0.197196	0.472755	0.421433	0.915636	0.13014	0.270104	n	1			7.27756	7.4416	7.4459	7.1796	7.35331	7.28407	6.96506	7.32498	7.47117	7.30765	7.54079	7.6116
ENSMUSG00000026341	0.0823273	0.0467872	0.150704	0.375563	0.589872	0.204855	n	1			8.12125	8.30735	8.22251	8.29776	8.43904	8.54	8.3823	8.54551	8.68919	8.29003	8.31779	8.49993
ENSMUSG00000026353	0.854843	0.85324	0.327604	0.722907	0.365395	0.293616	n	1			9.46432	9.27475	9.26149	9.4073	9.2282	9.31605	9.50677	9.23317	9.32223	9.38702	9.13135	9.10605
ENSMUSG00000026356	0.999517	0.679444	0.785125	0.648799	0.768123	0.519408	n	1			8.93781	9.35964	9.35831	8.99846	9.36614	9.2915	9.04742	9.3634	9.50516	8.83251	9.30509	9.33046
ENSMUSG00000026361	0.495675	0.297483	0.411356	0.676515	0.996374	0.630338	n	1			8.66366	8.9196	8.97584	8.73398	9.05465	9.11341	8.83887	9.02146	9.27475	8.81773	9.07774	9.00451
ENSMUSG00000026365	0.832292	0.460607	0.816578	0.274279	0.902188	0.787273	n	1			5.21947	5.03946	5.86691	5.32916	5.48899	5.49124	5.53012	5.46121	5.84251	4.72234	5.86196	5.88604
ENSMUSG00000026377	0.1437	0.0252659	0.188559	0.0904155	0.520125	0.475515	n	1			6.85455	7.04107	6.92857	7.01462	7.1444	7.03932	7.18404	7.40074	7.19704	6.94767	7.18404	7.33225
ENSMUSG00000026383	0.921049	0.493123	0.591534	0.434137	0.543642	0.975714	n	1			7.2312	6.5586	6.6326	7.15904	6.79448	6.55637	7.0992	6.09786	6.39049	7.24785	6.46698	5.92019
ENSMUSG00000026388	0.0228169	0.32753	0.0121162	0.112668	0.0264698	0.00417	n	1			7.51736	7.42422	7.48622	7.63256	7.59692	7.62594	7.29162	7.54214	7.20654	8.11666	8.01644	8.32599
ENSMUSG00000026393	0.000186751	0.00427596	0.000260597	0.190448	0.0623834	0.0287953	n	1			7.11432	7.27012	7.27012	6.36895	6.22967	6.23233	6.61229	6.29793	6.43797	6.06168	5.93276	6.16922
ENSMUSG00000026425	0.29025	0.0368367	0.445352	0.122715	0.54182	0.719975	n	1			6.5762	6.41151	6.46482	6.48702	6.3898	6.33514	6.32184	6.33128	6.20158	6.68478	6.29063	5.41268
ENSMUSG00000026426	0.206882	0.542294	0.0988974	0.839338	0.544687	0.603301	n	1			7.10456	7.32362	7.45812	7.47771	7.36011	7.6645	7.56518	7.0576	7.73171	7.73225	7.46244	7.54445
ENSMUSG00000026427	0.061752	0.365983	0.41905	0.522351	0.0550885	0.201561	n	1			7.03254	7.08377	7.04639	6.74591	6.9455	6.85317	6.73093	7.07545	6.99464	6.99385	7.13809	7.29077
ENSMUSG00000026434	0.156409	0.504889	0.561819	0.834139	0.394953	0.37009	n	1			6.8486	6.77388	6.83461	6.93556	6.84173	6.86976	7.06181	6.69242	6.97363	7.03045	6.58883	6.49564
ENSMUSG00000026455	0.206859	0.569446	0.829276	0.367824	0.326929	0.565438	n	1			7.90798	8.12657	8.09126	7.90899	7.99234	7.85233	7.8865	8.00234	8.07458	7.84525	8.11837	8.2601
ENSMUSG00000026473	0.0256811	0.0074056	0.0385318	0.0825572	0.604071	0.0367939	n	1			9.92651	10.3488	10.2364	10.8644	10.8969	10.5358	11.0835	10.9948	11.2172	10.7873	10.4659	10.7797
ENSMUSG00000026483	0.0011245	0.000148766	0.00109805	0.249222	0.182516	0.0256407	n	1			6.89577	6.97106	6.72647	5.2119	4.84987	5.26904	5.26904	5.48243	5.22281	4.84987	4.83037	4.86193
ENSMUSG00000026490	0.501423	0.0424885	0.346496	0.0844188	0.499867	0.608425	n	1			6.67492	6.69242	6.76788	6.64511	6.74954	6.63838	6.62378	6.47137	6.54348	6.77706	6.54742	6.48438
ENSMUSG00000026491	0.79197	0.516004	0.364306	0.891551	0.60661	0.60913	n	1			9.94864	10.0459	10.1012	9.86973	10.205	10.1167	9.99145	10.0801	10.1701	9.9691	10.1753	10.2722
ENSMUSG00000026496	0.000912458	0.0261096	0.749082	0.282473	0.0458975	0.0171387	n	1			9.42843	9.48694	9.48852	9.67843	9.71015	9.74485	9.70648	9.7803	9.92469	9.50244	9.51535	9.31219
ENSMUSG00000026499	0.249054	0.0858004	0.000582176	0.141317	0.0562493	0.8788	n	1			8.73546	8.76305	8.72851	8.60323	8.60192	8.76408	8.60814	8.28086	8.44437	8.42796	8.46531	8.48952
ENSMUSG00000026520	0.544392	0.231552	0.523417	0.489317	0.906494	0.300018	n	1			6.64718	6.23466	6.14775	6.664	6.56724	6.20956	6.64581	6.7931	6.4092	6.5041	6.46482	6.41629
ENSMUSG00000026548	0.00195041	0.416186	0.0461302	0.000370539	0.0270768	0.023767	y	1	lower		6.15005	5.91766	6.05141	6.76391	6.79225	6.6524	5.90225	6.064	5.92133	6.3116	6.23233	6.5138
ENSMUSG00000026554	0.381796	0.791691	0.0345798	0.656676	0.286485	0.195508	n	1			10.0411	10.0724	10.0423	10.025	10.1117	10.1234	10.0188	10.1374	10.0339	10.1613	10.1425	10.0954
ENSMUSG00000026558	0.0137741	0.00777878	0.000475653	0.0498835	0.000193851	0.00112269	y	1	intermediate		10.3381	10.3076	10.3124	10.06	9.98091	10.1075	9.96095	9.89613	9.81077	9.34222	9.37092	9.44745
ENSMUSG00000026563	0.0473398	0.151404	0.0765555	0.510837	0.590468	0.359549	n	1			8.12519	8.45847	8.35684	7.8324	8.0778	7.95555	7.83782	8.20487	8.11079	7.5608	7.91076	8.08586
ENSMUSG00000026565	0.754528	0.893068	0.199177	0.959153	0.241042	0.282853	n	1			7.489	7.25161	7.36384	7.49591	7.1952	7.30073	7.62363	7.03932	7.36067	7.34636	7.03709	6.71533
ENSMUSG00000026571	0.141935	0.0762453	0.13643	0.625892	0.621037	0.311418	n	1			9.35108	9.27156	9.19851	9.42961	9.48694	9.88907	9.72434	9.46055	9.93659	9.65739	9.31219	9.5496
ENSMUSG00000026577	0.0153623	0.0145161	0.0138793	0.395322	0.0897033	0.211149	n	1			8.16326	8.35191	8.29286	7.80631	8.02954	7.92162	7.6556	7.92681	7.87318	7.39348	7.66222	7.76915
ENSMUSG00000026581	0.054556	0.947998	0.119878	0.242418	0.826851	0.221483	n	1			6.22856	6.26118	6.22336	6.45643	6.63927	6.42055	6.14063	6.56072	6.04673	6.32622	6.56274	6.72221
ENSMUSG00000026611	0.156663	0.366377	0.283511	0.0875892	0.469537	0.134487	n	1			8.48196	8.15033	8.17113	8.65391	8.43855	8.41487	8.33308	8.0868	7.81058	8.49197	8.47426	8.311
ENSMUSG00000026615	0.191718	0.501128	0.441026	0.935042	0.329258	0.321074	n	1			8.57831	8.48196	8.5761	8.64794	8.54921	8.69472	8.76526	8.40761	8.75263	8.64967	8.4531	7.77775
ENSMUSG00000026618	0.380171	0.346431	0.500953	0.745406	0.346917	0.295738	n	1			7.33587	7.39176	7.4596	7.3802	7.50388	7.45296	7.35704	7.50767	7.54371	7.12983	7.2055	7.54023
ENSMUSG00000026634	0.12501	0.677746	0.00633193	0.383045	0.0504995	0.0522963	n	1			8.29286	8.42445	8.46439	8.18432	8.10497	8.35438	8.15461	8.35438	8.51297	7.92593	7.8889	7.95421
ENSMUSG00000026687	0.445437	0.56368	0.193534	0.281036	0.286045	0.164693	n	1			9.17559	9.12326	9.02518	9.10439	8.87349	9.11177	9.18977	9.0675	9.17782	8.74913	8.49233	9.09369
ENSMUSG00000026698	0.145581	0.325376	0.0741058	0.525458	0.974227	0.455263	n	1			7.91011	7.8865	7.87706	7.66786	7.86058	7.59171	7.71254	7.94874	7.69687	7.61205	7.69308	7.80488
ENSMUSG00000026701	0.00678188	0.0163101	0.134377	0.870442	0.320127	0.309838	n	1			10.75	10.7292	10.6987	10.8617	10.8655	10.8768	10.8201	10.8895	10.9095	10.8607	10.8508	10.7385
ENSMUSG00000026708	0.669686	0.491039	0.55676	0.749493	0.971696	0.732049	n	1			8.06586	8.37902	8.37529	7.96704	8.32687	8.31014	7.85059	8.30221	8.2601	8.10345	8.19626	8.28935
ENSMUSG00000026709	0.201087	0.144985	0.021179	0.987152	0.0954036	0.00967676	n	1			6.41399	5.97056	5.87669	6.60555	6.66858	6.10473	6.39191	6.5292	6.4676	6.83266	6.92857	7.08656
ENSMUSG00000027520	0.87814	0.913856	0.0348346	0.95093	0.0623573	0.0353531	n	1			6.80077	6.71203	6.66956	6.90093	6.85754	6.49297	6.90407	6.74652	6.56895	7.06886	7.09	7.38773
ENSMUSG00000033021	0.0109833	0.11197	0.228423	0.610502	0.0358467	0.0431157	n	1			7.37689	7.43617	7.49091	7.62453	7.67155	7.59889	7.56203	7.88828	7.62545	7.31118	7.44058	7.20121
ENSMUSG00000033159	0.168598	0.322931	0.0761459	0.697886	0.606447	0.395871	n	1			9.28365	9.08317	9.04088	9.0992	8.92971	8.85372	9.14639	9.02449	8.85223	8.99913	8.83615	8.90029
ENSMUSG00000033227	0.543294	0.1207	0.375957	0.0829826	0.268694	0.521451	n	1			7.11333	6.9034	6.9959	7.1101	6.91859	7.18336	6.91859	6.40532	6.58883	7.15539	6.58744	6.66191
ENSMUSG00000033671	0.433201	0.0585929	0.696895	0.138536	0.678462	0.0686068	n	1			8.13024	8.17045	8.13631	7.98537	8.23238	7.97169	7.69753	7.93105	7.92552	7.97223	8.15461	8.21197
ENSMUSG00000033684	0.582643	0.581304	0.377771	0.976254	0.416071	0.418411	n	1			8.38767	8.09462	7.9553	8.26647	7.81979	8.02649	8.31014	7.93818	7.84621	8.15786	7.87433	4.9643
ENSMUSG00000033793	0.0194023	0.0256064	0.141551	0.763597	0.812836	0.955671	n	1			9.07196	9.18564	9.24349	9.37092	9.55274	9.4203	9.31605	9.46964	9.48443	9.19627	9.49356	9.55782
ENSMUSG00000033845	0.0112072	0.000936645	0.00337514	0.0646333	0.00474854	0.0116903	n	1			10.1618	10.2522	10.2837	9.86585	10.0349	9.92806	9.75785	9.85415	9.7372	8.89313	9.15422	9.21414
ENSMUSG00000033952	0.158611	0.222494	0.130417	0.792989	0.30177	0.271217	n	1			5.83853	5.56465	5.56034	5.92019	5.76154	5.86196	5.96301	5.7761	5.73273	6.43611	6.19081	5.74727
ENSMUSG00000034066	0.051174	0.00200081	0.955482	0.0886586	0.0953236	0.0245178	n	1			4.88263	4.76397	4.72234	4.53106	4.40524	4.65969	4.28707	4.28707	4.40524	4.77343	4.64564	4.96908
ENSMUSG00000034088	0.855323	0.625903	0.376439	0.807734	0.387119	0.406825	n	1			9.63674	9.55316	9.54265	9.61261	9.26728	9.76093	9.71015	9.21332	9.55576	9.66991	9.21414	6.49825
ENSMUSG00000034432	0.348927	0.0189823	0.31594	0.03584	0.822075	0.088734	y	1	higher		9.19549	9.14136	9.06213	9.25016	9.17493	9.13678	9.36721	9.33929	9.27025	9.15081	9.16191	9.28937
ENSMUSG00000036104	0.837462	0.279564	0.239759	0.35119	0.288808	0.68438	n	1			7.69923	7.54706	7.4672	7.676	7.63426	7.46483	7.77126	7.70588	7.57334	7.91076	7.68287	7.60214
ENSMUSG00000036707	0.228957	0.0848523	0.0670909	0.666837	0.815125	0.784603	n	1			8.34084	8.46531	8.40486	8.3783	8.64586	8.61078	8.46256	8.64303	8.67943	8.48	8.5681	8.66194
ENSMUSG00000037434	0.812054	0.225448	0.24045	0.26466	0.272448	0.595387	n	1			8.11393	8.13631	8.21954	8.10345	8.19379	8.14087	8.12125	8.12477	8.00961	7.89994	8.05328	8.15461
ENSMUSG00000037474	0.789663	0.785451	0.763559	0.938586	0.614028	0.634449	n	1			7.96417	8.17378	8.17724	7.98081	8.20428	8.21954	7.90714	8.22336	8.31014	7.87768	8.09367	8.22393
ENSMUSG00000037624	0.261084	0.0759207	0.0356053	0.158546	0.0190169	0.285434	n	1			6.54269	6.91789	6.95761	6.50616	6.69242	6.60999	6.22532	6.46268	6.53158	6.15127	6.25144	6.38593
ENSMUSG00000038034	0.898622	0.906332	0.665097	0.975801	0.601478	0.517512	n	1			8.05563	7.64788	7.70363	8.12125	7.63895	7.7267	8.00682	7.81639	7.64602	7.83116	7.76915	7.59889
ENSMUSG00000038079	0.0416832	0.0060903	0.0829405	0.671892	0.0178759	0.000567936	n	1			8.65139	8.73698	8.81593	8.29697	8.43972	8.56992	8.34235	8.4531	8.39017	8.82095	8.86173	8.94056
ENSMUSG00000038733	0.878345	0.885102	0.694766	0.961704	0.795218	0.870208	n	1			10.0983	10.1441	10.2094	10.1613	9.99919	10.2509	10.2543	9.87621	10.258	10.3141	10.025	9.96232
ENSMUSG00000038949	0.318761	0.303602	0.0789149	0.780335	0.143235	0.183803	n	1			8.19017	8.12318	8.0358	8.20244	8.24283	8.1085	8.12892	8.32626	8.16427	8.35236	8.25143	8.56384
ENSMUSG00000039318	0.909654	0.206477	0.0110421	0.231224	0.0110197	0.029813	n	1			7.82983	7.65865	7.66332	7.81609	7.73552	7.62855	7.73445	7.89366	7.861	7.96013	8.08485	8.10959
ENSMUSG00000039630	0.12003	0.00204702	0.483643	0.0466001	0.186677	0.00668015	y	1	higher		10.9379	11.0247	11.0105	11.0227	11.1128	11.1901	11.2657	11.2435	11.3436	11.0105	11.0355	10.9978
ENSMUSG00000039748	0.0199012	0.0115606	0.00241261	0.775588	0.026253	0.0296141	n	1			6.45124	6.36735	6.27835	6.6165	6.67868	6.65169	6.59743	6.68406	6.69936	6.75038	6.85818	6.86734
ENSMUSG00000040124	0.860979	0.904915	0.714972	0.762506	0.792372	0.646226	n	1			5.52664	5.94067	6.03728	5.59874	5.9109	5.88953	5.54172	5.94205	6.10855	5.35724	5.87559	5.9791
ENSMUSG00000040297	0.0794029	0.870335	0.2166	0.101978	0.329543	0.287277	n	1			9.4397	9.45412	9.31478	9.55644	9.56579	9.80592	9.37312	9.23531	9.54657	9.56377	9.61697	9.39326
ENSMUSG00000040843	0.181211	0.0423538	0.00832731	0.230327	0.0713291	0.408389	n	1			9.48694	9.53872	9.49603	9.38702	9.50931	9.38503	9.26546	9.39022	9.38169	9.27736	9.35831	9.26149
ENSMUSG00000040865	0.188985	0.0604801	0.0489691	0.447477	0.260197	0.628749	n	1			6.26603	5.9791	5.93016	6.37369	6.43501	6.08274	6.54269	6.2526	6.44699	6.40532	6.52612	6.46134
ENSMUSG00000040918	0.00121171	0.00685155	0.00152532	0.201736	0.0147489	0.0937333	n	1			7.58077	7.74591	7.63895	6.91252	7.0526	7.10373	6.65313	6.82431	7.01462	6.41879	6.70687	6.45124
ENSMUSG00000041040	0.3085	0.0245195	0.0529309	0.448603	0.0590625	0.0929088	n	1			8.44975	8.40707	8.42133	8.40707	8.42059	8.31242	8.3682	8.35971	8.31242	8.01465	8.13193	8.26393
ENSMUSG00000041406	0.0634641	0.0112981	0.1259	0.145432	0.810416	0.37724	n	1			6.00222	6.09094	6.0933	6.33343	6.63994	6.31606	6.52287	6.69035	6.81532	6.25551	6.37862	6.80952
ENSMUSG00000041426	0.404696	0.82406	0.433752	0.59465	0.979309	0.599632	n	1			5.7896	5.97307	5.95699	5.49124	6.00491	5.74971	5.57907	6.02347	6.00222	5.54965	5.60369	6.07405
ENSMUSG00000041559	0.646833	0.0150307	0.403968	0.0460756	0.522707	0.537565	y	1	higher		5.48243	5.29681	5.64211	5.80109	5.36086	5.50341	6.21414	5.93836	5.93836	5.18856	6.17082	6.03975
ENSMUSG00000041570	0.120352	0.270767	0.807039	0.70613	0.412087	0.565974	n	1			6.85682	6.74715	6.84691	6.7226	6.77621	6.69103	6.67364	6.80819	6.76573	6.66858	6.87048	6.85317
ENSMUSG00000041763	0.852195	0.722175	0.221194	0.639752	0.432406	0.241403	n	1			9.76912	9.95502	9.93659	9.72196	9.86585	10.0115	9.81774	9.86472	10.1002	9.79667	9.80484	9.75271
ENSMUSG00000041879	5.40563e-05	0.000910488	0.0356751	0.533906	0.326141	0.263993	n	1			7.45661	7.4684	7.49029	6.77774	6.72221	6.77926	6.70687	6.79859	6.69497	6.78922	6.79448	7.12703
ENSMUSG00000041926	0.223383	0.447873	0.150614	0.14808	0.512908	0.0981188	n	1			7.88515	7.97797	7.8986	8.00417	8.04177	8.44372	7.72444	7.9351	7.91011	8.16326	8.01714	7.96535
ENSMUSG00000042046	0.878411	0.476561	0.0244286	0.608225	0.0239062	0.0331986	n	1			6.06485	5.95337	5.89269	6.04843	5.85496	5.97056	5.91229	5.85095	5.99363	5.58704	5.2659	5.17822
ENSMUSG00000042197	0.361301	0.13408	0.859806	0.684621	0.523345	0.304973	n	1			8.90782	9.07007	9.08317	8.78749	8.96372	9.02649	8.84212	8.88603	8.94426	8.84027	9.06625	9.09827
ENSMUSG00000042207	0.128358	0.142589	0.125869	0.767238	0.856461	0.891911	n	1			10.5866	10.1894	10.1794	10.8364	10.5468	10.5453	10.9978	10.4431	10.6688	10.9095	10.6309	10.4802
ENSMUSG00000042305	0.42505	0.742883	0.0124337	0.574171	0.13472	0.0244768	n	1			8.62031	8.59897	8.577	8.6768	8.7329	8.54921	8.63136	8.6632	8.54344	8.72489	8.78749	8.82008
ENSMUSG00000042429	0.879878	0.202244	0.40566	0.377657	0.489284	0.109274	n	1			6.85602	6.80657	6.91015	6.85602	6.6524	7.13739	7.14591	6.84112	7.19428	6.84619	6.5382	6.85818
ENSMUSG00000042772	0.892293	0.416147	0.399078	0.335194	0.433945	0.206503	n	1			8.03734	7.76982	7.55775	8.06084	7.70202	7.68235	7.8267	7.65865	7.33587	7.92489	7.72208	8.56927
ENSMUSG00000042793	0.195572	0.0390065	0.986929	0.0264823	0.514724	0.0384775	y	1	lower		5.97546	5.91933	5.88469	5.99754	6.0206	5.93385	5.69108	5.69913	5.47967	5.91853	5.81177	6.05322
ENSMUSG00000043019	0.415826	0.0909908	0.331488	0.231558	0.627015	0.664195	n	1			7.07545	7.41794	7.44737	7.33735	7.69308	7.36099	7.489	7.69923	7.95555	7.18478	7.69234	7.90653
ENSMUSG00000044744	0.00403381	0.20344	3.95171e-05	0.162299	0.0211183	0.0610091	n	1			6.60306	6.65014	6.59743	7.21185	7.41067	7.326	6.87783	7.28053	6.67868	7.64079	7.55396	7.63426
ENSMUSG00000044783	0.00410322	0.00137586	0.885398	0.0812824	0.66909	0.588933	n	1			8.64967	8.61363	8.50306	9.11717	8.94464	8.97256	9.28981	9.18977	9.09499	9.75683	9.54265	5.84525
ENSMUSG00000045382	0.0260907	0.000502545	0.25026	0.00273251	0.545656	0.410817	y	1	higher		5.67489	5.58129	5.51639	5.93962	5.81647	5.75716	6.23844	6.42148	6.35312	6.24692	6.40262	5.48243
ENSMUSG00000047539	0.6261	0.300785	0.145472	0.602411	0.320742	0.605482	n	1			7.39996	7.44058	7.48313	7.36067	7.56518	7.50546	7.40417	7.57487	7.59831	7.59692	7.66407	7.46025
ENSMUSG00000048000	0.480584	0.0855722	0.109271	0.131959	0.163261	0.361145	n	1			7.91718	7.81058	7.86946	7.93105	7.84723	7.91239	7.96936	7.9327	7.96535	8.02649	7.92246	8.14923
ENSMUSG00000048495	0.462875	0.329935	0.16462	0.662451	0.264931	0.401274	n	1			6.76688	6.8764	6.99948	6.84546	7.07272	6.95309	6.85754	7.18564	6.9929	7.00584	7.06181	7.46244
ENSMUSG00000049339	0.545004	0.729775	0.906941	0.757354	0.558498	0.775149	n	1			10.2522	9.89868	9.89201	10.1425	9.78438	9.78132	10.1105	10.0002	9.75576	10.1539	9.88237	9.95233
ENSMUSG00000050229	0.593746	0.179983	0.005167	0.463277	0.0957821	0.191739	n	1			7.12587	7.26071	7.15287	7.01707	7.04788	7.29819	6.87289	7.14073	7.05939	6.94185	6.84691	6.8366
ENSMUSG00000050565	0.735089	0.429949	0.504277	0.290503	0.351615	0.921646	n	1			7.20973	7.5354	7.41067	7.19189	7.47522	7.35198	7.28053	7.62594	7.65468	7.27413	7.52054	7.71161
ENSMUSG00000050777	0.121694	0.72206	0.174968	0.842923	0.325948	0.376496	n	1			7.80488	7.80921	7.78529	7.73171	7.76915	7.66222	7.91135	7.82936	7.50709	7.67382	7.70826	7.38603
ENSMUSG00000051185	0.660238	0.526912	0.153588	0.780927	0.295379	0.565652	n	1			10.285	10.5749	10.6074	10.2636	10.3752	10.6197	10.3597	10.1234	10.6165	10.1925	10.195	10.4045
ENSMUSG00000051285	0.00770861	0.16788	0.0203831	0.736287	0.383776	0.926639	n	1			5.63157	5.56699	5.54327	5.43207	5.32916	5.38315	5.56699	5.18059	5.25771	5.41621	5.24131	5.30886
ENSMUSG00000052331	0.0891066	0.0640827	0.0732225	0.261506	0.335507	0.747808	n	1			7.22941	7.29187	7.31118	6.99051	7.12659	6.76241	7.03418	7.19704	7.1392	6.98577	7.12703	7.17988
ENSMUSG00000052423	0.80268	0.834098	0.748178	0.702133	0.658884	0.836293	n	1			6.96058	6.90011	7.074	7.05068	7.03586	6.76057	7.06949	7.07272	6.85254	7.06468	7.29237	6.75452
ENSMUSG00000052748	0.887742	0.857964	0.0648369	0.807154	0.19274	0.106479	n	1			8.02198	8.08167	8.14087	8.13363	7.88925	8.27735	8.12318	7.87132	8.18897	8.39524	8.17239	8.3871
ENSMUSG00000053286	0.433021	0.196529	0.0147721	0.0934523	0.00894289	0.189973	n	1			7.1826	7.1285	7.27149	7.15348	7.21185	7.05603	7.2055	7.31284	7.41794	7.37689	7.40812	7.50899
ENSMUSG00000053333	0.227565	0.0624559	0.718261	0.151746	0.121782	0.0497724	n	1			7.45178	7.25912	7.11566	7.23485	7.06949	7.002	7.01757	6.79074	6.46822	7.50479	7.23038	7.24487
ENSMUSG00000054770	0.778662	0.864515	0.0208919	0.949526	0.0249667	0.0390761	n	1			6.77981	6.7063	6.65313	6.7939	6.6792	6.71139	6.80342	6.73214	6.63691	6.8662	6.88802	6.99828
ENSMUSG00000055013	0.0481636	0.136728	0.0131343	0.0203946	0.104084	0.0058666	y	1	lower		6.94942	6.78337	6.76391	7.19279	6.98235	7.04592	6.7939	6.58044	6.47398	7.28688	7.15713	7.44405
ENSMUSG00000055184	0.00673417	0.0271991	0.242529	0.267993	0.565227	0.968098	n	1			6.12146	6.17082	6.23943	5.73623	5.89507	5.87265	5.82322	5.95948	6.00934	5.74503	5.84027	6.22756
ENSMUSG00000055197	0.646838	0.013079	0.0457511	0.0278834	0.0395634	0.356646	y	1	intermediate		6.78232	6.60041	6.46894	6.73882	6.02988	6.70048	5.75397	5.53196	5.11173	5.63814	4.30633	5.04696
ENSMUSG00000056211	0.0940989	0.0591369	0.335929	0.721108	0.384491	0.394908	n	1			9.49603	9.5496	9.58195	9.30663	9.4903	9.39511	9.31364	9.32131	9.47205	9.30996	9.28465	6.42422
ENSMUSG00000056536	0.0364483	0.016025	0.00117246	0.0957599	0.00188926	0.00785137	n	1			6.23057	6.12672	6.22141	5.95008	6.09178	6.03572	5.83382	5.97546	5.76905	5.34646	5.54764	5.43476
ENSMUSG00000056763	0.560531	0.113991	0.0181683	0.0878634	0.02272	0.00502848	n	1			7.8147	7.88515	7.93443	7.83116	8.045	7.8986	7.62545	7.83116	7.73301	8.13154	8.35824	8.34634
ENSMUSG00000057335	0.586205	0.861571	0.747551	0.811484	0.861661	0.930724	n	1			6.6792	6.9455	6.92636	6.72354	7.00025	7.06949	6.69606	6.76862	7.18564	6.75286	6.81364	7.1378
ENSMUSG00000058076	0.205997	0.078746	0.869224	0.534798	0.510411	0.379215	n	1			8.78501	8.79734	8.70184	9.07347	8.85412	8.80398	9.12967	8.88041	8.94817	8.99463	8.91533	8.23958
ENSMUSG00000058267	0.0407195	0.0169905	0.00279653	0.0297896	0.0145889	0.0516383	y	1	intermediate		9.68706	9.52727	9.52037	9.82387	9.82043	9.75785	9.91034	9.93157	9.85984	10.0305	9.99763	10.1425
ENSMUSG00000058729	0.111368	0.139279	0.133827	0.998463	0.87993	0.885673	n	1			6.28238	6.6014	6.60888	6.61229	6.98482	7.19966	6.58883	6.95386	7.25566	6.9334	7.16621	6.58044
ENSMUSG00000059498	0.000714462	0.000127174	7.70368e-05	0.116251	0.678696	0.097782	n	1			7.22377	7.343	7.08377	8.83752	8.92063	8.91283	8.59686	8.83251	8.73066	8.79307	8.99165	8.98362
ENSMUSG00000060679	0.0209283	0.0076787	0.0684513	0.615367	0.846087	0.566063	n	1			8.61599	8.62978	8.75501	7.89994	8.2552	8.15515	7.86272	8.06293	8.15998	7.83268	8.32253	8.27299
ENSMUSG00000062169	0.0969143	0.0378271	0.324313	0.49252	0.399236	0.160688	n	1			6.80582	6.55683	6.64649	7.02315	6.8641	6.78105	6.95273	7.04265	6.87121	6.72947	6.69497	6.94485
ENSMUSG00000062510	0.172199	0.0119696	0.755947	0.352162	0.164726	0.0464908	n	1			5.67048	5.57135	5.61149	5.5897	5.24464	5.41268	5.3989	5.23839	5.23839	5.48899	5.64211	5.82975
ENSMUSG00000062963	0.377123	0.111503	0.084008	0.248519	0.148803	0.66944	n	1			8.26437	8.27177	8.24212	8.28034	8.48952	8.25765	8.35581	8.6585	8.48	8.3832	8.58648	8.70117
ENSMUSG00000064302	0.069475	0.154828	0.350067	0.916468	0.398006	0.401343	n	1			8.50637	8.47825	8.52631	8.25143	8.31598	8.42701	8.41764	8.15515	8.38852	8.21001	8.29329	4.64564
ENSMUSG00000066595	0.967018	0.641674	0.0953217	0.564259	0.00838017	0.108562	n	1			4.95904	4.69098	4.40524	4.83037	4.62943	4.61909	4.55118	4.80597	5.01297	5.14711	5.05441	5.21378
ENSMUSG00000070939	0.0987819	0.250674	0.00966205	0.718771	0.162002	0.156725	n	1			6.27988	6.22035	6.16295	6.64201	6.49002	6.31241	6.57413	6.51555	6.17082	6.61933	6.61744	6.82431
ENSMUSG00000073616	0.20191	0.243728	0.126529	0.986264	0.679181	0.750457	n	1			11.1544	10.9157	10.9133	11.2565	11.1494	11.0445	11.1971	11.268	10.991	11.1211	11.1494	11.2868
ENSMUSG00000073725	0.00704266	0.0032736	0.122358	0.0118966	0.48462	0.0313613	y	1	lower		7.87433	7.84025	7.87902	7.67103	7.72251	7.6376	7.50038	7.54263	7.43233	7.66332	7.67792	7.83581
ENSMUSG00000078185	0.181759	0.197039	0.760815	0.0584606	0.219594	0.1067	n	1			5.54764	5.71597	5.83513	5.97223	5.72882	6.19081	5.43876	5.68187	5.43876	5.81177	5.76905	5.61839
ENSMUSG00000079139	0.0262772	0.028146	0.0595375	0.778674	0.92869	0.881349	n	1			9.27736	9.33649	9.25319	9.46055	9.48624	9.62225	9.41124	9.52418	9.5713	9.52119	9.3993	9.62493
ENSMUSG00000079252	0.959247	0.258858	0.523047	0.217064	0.432832	0.530379	n	1			7.69992	7.91471	7.93676	7.75542	7.89773	7.88368	7.82936	8.05563	8.14769	7.78055	7.95084	8.04795
ENSMUSG00000079470	0.27555	0.295765	0.00610469	0.782408	0.0120147	0.0131457	n	1			7.67275	7.67989	7.47522	7.59171	7.77569	7.84099	7.7064	7.79358	7.62906	8.23908	8.14693	8.46741
ENSMUSG00000005973	0.571379	0.00886045	0.0264479	0.00213232	0.036834	0.277897	y	2	intermediate	SO	5.34646	5.59736	5.54965	5.50913	5.51094	5.64034	6.26368	6.22756	6.26603	6.3024	6.4092	6.98741
ENSMUSG00000007476	0.0223273	0.0470573	0.179873	0.118168	0.438031	0.66677	n	2		SO	7.17487	7.19428	7.21028	7.31245	7.27454	7.25092	7.45588	7.30376	7.45178	7.29556	7.2586	7.5213
ENSMUSG00000015839	0.254912	0.192676	0.184146	0.0417476	0.794646	0.0338996	y	2	higher	SO	7.45296	7.76398	7.79292	7.31782	7.58009	7.55841	7.76007	7.85099	8.13363	7.36772	7.40306	7.59393
ENSMUSG00000017009	0.489117	0.786671	0.0327934	0.754766	0.0223516	0.0671081	n	2		SO	9.00925	7.44873	7.57263	8.06334	7.4798	7.15224	8.88539	6.88488	7.5902	6.6246	5.54965	5.65167
ENSMUSG00000017707	0.771372	0.173342	0.44453	0.101803	0.0632228	0.033499	n	2		SO	10.4999	10.9898	11.0066	10.7594	10.9748	10.935	11.0688	11.0602	11.3848	10.6799	10.7306	10.6132
ENSMUSG00000017760	0.309242	0.561594	0.129865	0.297975	0.305608	0.201709	n	2		SO	6.40111	6.55026	6.53677	6.52111	6.61397	6.55189	6.51962	6.52753	6.22336	6.65091	6.55763	6.61397
ENSMUSG00000026718	0.174475	0.502884	0.0825329	0.90745	0.0342031	0.0581786	n	2		SO	5.6447	5.70475	5.61839	5.48705	5.53736	5.65167	5.37261	5.6447	5.70159	5.75831	5.97651	6.06074
ENSMUSG00000026727	0.143358	0.00383449	0.250366	0.0225615	0.725945	0.166515	y	2	higher	SO	6.23233	6.27727	6.15811	6.47137	6.24791	6.38079	6.74954	6.71139	6.57086	6.67008	6.27198	6.321
ENSMUSG00000026775	0.0455873	4.66244e-05	0.0247359	0.749646	0.22285	0.146468	n	2		SO	9.24835	9.25107	9.22428	9.40656	9.62865	9.57369	9.50115	9.51614	9.51822	9.53598	9.72871	9.76912
ENSMUSG00000026832	0.102556	0.0261945	0.0607737	0.00595786	0.151722	0.0186932	y	2	higher	SO	6.69655	6.84619	6.62125	6.43873	6.65876	6.44516	6.92857	7.18045	7.07916	5.91229	6.09237	6.47208
ENSMUSG00000026836	0.687708	0.517789	0.893668	0.939099	0.619129	0.434764	n	2		SO	5.01626	5.36367	5.06909	4.95399	5.56257	5.20513	5.04696	5.3989	5.32689	5.2007	4.92467	5.2598
ENSMUSG00000026837	0.0830099	0.0387738	4.63619e-05	0.729987	0.0015316	0.000138202	n	2		SO	7.93974	7.84301	7.82339	7.79429	7.60014	7.53723	7.64016	7.77482	7.61954	6.64438	6.73151	6.79505
ENSMUSG00000026872	0.953189	0.508491	0.355826	0.52668	0.36558	0.291019	n	2		SO	4.98666	5.01297	5.07407	4.94303	5.01626	5.12573	5.14711	4.88263	5.40945	4.79889	4.90097	5.07977
ENSMUSG00000026893	0.0720882	0.395493	0.0596174	0.106036	0.222745	0.0375597	n	2		SO	6.69242	6.88556	6.81702	6.4092	6.65313	6.61995	6.7489	6.88437	7.27756	6.35398	6.06074	6.54084
ENSMUSG00000026958	0.114391	0.0794513	0.645617	0.319369	0.0196735	0.00028775	n	2		SO	5.41268	4.83778	5.05047	4.78773	4.76397	4.49741	4.57551	4.49741	4.60933	5.21378	5.11545	5.24464
ENSMUSG00000027002	0.351229	0.073518	0.0477239	0.117056	0.0867092	0.85696	n	2		SO	10.5832	10.7231	10.6847	10.6593	10.8183	10.7119	10.7833	11.0375	11.1231	10.8002	11.0661	11.0026
ENSMUSG00000027004	0.0812879	0.778279	0.0518942	0.208364	0.331388	0.093443	n	2		SO	7.42346	7.64125	7.57527	7.2734	7.40108	7.40074	7.38075	7.48443	7.67664	7.17642	7.15592	7.41665
ENSMUSG00000027010	0.0137388	0.0287235	0.282475	0.744923	0.905873	0.989219	n	2		SO	5.99664	5.88731	5.97223	5.6077	5.68341	5.77317	5.70044	5.81423	5.62578	5.44637	5.66818	6.01806
ENSMUSG00000027204	0.866074	0.328216	0.114928	0.377297	0.118706	0.252573	n	2		SO	4.99161	5.18419	5.18419	5.05982	5.05441	5.30194	5.01626	5.50913	5.42439	5.28773	5.70745	6.04273
ENSMUSG00000027276	0.00796209	0.00275412	0.0376325	0.00612454	0.183374	0.145589	y	2	lower	SO	6.99167	6.9065	6.95053	6.75805	6.66191	6.62378	6.30041	6.34307	6.15005	6.41811	6.35769	6.68478
ENSMUSG00000027287	0.139448	0.421332	0.319519	0.47882	0.0788037	0.163852	n	2		SO	6.56019	6.76241	6.7063	6.32688	6.60715	6.51717	6.40262	6.64272	6.69035	6.61397	6.87121	7.0158
ENSMUSG00000027397	0.367726	0.0305449	0.356556	0.274691	0.508397	0.783118	n	2		SO	6.80173	6.82017	6.78105	6.80077	6.96242	6.81751	6.90261	6.99662	6.91516	6.74652	6.93396	7.28357
ENSMUSG00000027422	0.00112286	0.00821304	0.143369	0.155979	0.769751	0.775501	n	2		SO	8.26197	8.19478	8.22336	8.48736	8.47766	8.42209	8.45174	8.39641	8.35824	8.577	8.45056	8.26847
ENSMUSG00000027444	0.697146	0.00647105	0.134117	0.00262463	0.111528	0.0442323	y	2	higher	SO	8.07458	8.01563	8.08059	8.0152	8.11347	7.98597	8.59474	8.8255	8.76151	8.23412	8.18847	8.53831
ENSMUSG00000027472	0.789668	0.100888	0.572915	0.204577	0.762266	0.368697	n	2		SO	6.99385	6.88625	6.85818	7.07464	6.81021	6.92928	7.21797	7.08194	6.98157	6.93775	6.84112	7.15153
ENSMUSG00000027637	0.0386811	0.0483416	0.0137071	0.809681	0.145043	0.12365	n	2		SO	9.88237	10.06	10.1117	10.2806	10.3677	10.2176	10.3175	10.3309	10.1642	10.3296	10.4554	10.6012
ENSMUSG00000034101	0.104055	0.866975	0.384354	0.45018	0.420259	0.72597	n	2		SO	7.46913	7.35114	7.33534	7.55214	7.47393	7.46244	7.59307	7.35331	7.26774	7.46679	7.51437	7.35801
ENSMUSG00000034903	0.245337	0.0505832	0.556282	0.381342	0.855119	0.464881	n	2		SO	5.76714	6.07405	5.99073	5.98614	6.39961	6.08658	6.13439	6.46822	6.33873	5.80109	5.97435	6.54428
ENSMUSG00000035109	0.018302	0.0203021	0.225108	0.236407	0.0196818	0.0564838	n	2		SO	7.05702	6.96337	6.82812	7.35575	7.29376	7.20499	7.56877	7.24865	7.54883	7.03759	7.03982	7.1101
ENSMUSG00000036591	0.151827	0.0667837	0.166467	0.204304	0.31787	0.813913	n	2		SO	5.20513	5.47054	5.21947	5.45912	5.54764	5.44823	5.59874	5.60558	6.02501	5.39212	5.79457	6.2643
ENSMUSG00000037523	0.20163	0.0101307	0.770565	0.0265004	0.233103	0.0148496	y	2	higher	SO	5.57676	5.71298	5.55556	5.75831	5.6447	5.72265	5.86691	6.01118	6.07039	5.51639	5.5132	5.73273
ENSMUSG00000038628	0.536368	0.558529	0.694184	0.77714	0.939755	0.864427	n	2		SO	7.54214	7.59749	7.6346	7.44483	7.61954	7.58476	7.30307	7.70444	7.5223	7.35072	7.52613	7.74139
ENSMUSG00000039943	0.00570471	3.61388e-05	0.000743841	0.600603	0.0136166	0.0101193	n	2		SO	6.8214	6.8332	6.88556	6.32797	6.29793	6.13548	6.31342	6.29972	6.2603	6.01195	5.84981	5.90401
ENSMUSG00000040152	0.146916	0.136496	0.0279504	0.98435	0.0500184	0.0511512	n	2		SO	5.2659	5.19592	5.10062	5.21378	5.34327	5.39212	5.27916	5.25531	5.41932	5.6003	5.64966	5.97155
ENSMUSG00000044641	0.289592	0.369299	0.409409	0.252708	0.586553	0.19928	n	2		SO	6.14273	6.17923	6.13209	6.05417	6.06168	6.17358	6.19719	6.14592	6.5586	5.81025	5.91766	6.28238
ENSMUSG00000047459	0.0224779	0.000831392	0.113862	0.0354531	0.40388	0.814308	y	2	higher	SO	7.75129	7.87947	7.87284	8.01763	8.22776	8.11449	8.32438	8.44623	8.32106	8.01563	8.27911	8.64794
ENSMUSG00000050199	0.00333905	0.00202142	0.00585883	0.801504	0.055589	0.0401032	n	2		SO	6.20158	6.04988	6.06485	6.8332	6.85818	6.85906	6.76939	6.82737	7.01859	7.17687	7.37863	7.64735
ENSMUSG00000060802	0.214197	0.122823	0.485392	0.259164	0.416371	0.199544	n	2		SO	7.30881	7.75929	8.10777	8.0358	8.17896	8.19215	8.10187	8.32986	8.42133	7.74466	7.80011	8.31014
ENSMUSG00000061689	0.134728	0.300234	0.952718	0.0274174	0.0541929	0.204161	n	2		SO	8.86893	8.54115	8.62897	8.98834	8.88672	8.83819	8.57931	8.63668	8.36189	8.80321	8.67165	8.58648
ENSMUSG00000005803	0.109736	0.0260062	0.00126008	0.00695264	0.00210441	0.000337969	y	2	lower	PM	11.3867	11.3153	11.3294	11.4093	11.4595	11.3711	11.2512	11.2336	11.157	11.6682	11.7812	11.7457
ENSMUSG00000016356	0.0361736	0.208665	0.787513	0.0391699	0.00668904	0.241489	n	2		PM	9.11177	8.89556	8.98242	9.30996	9.25813	9.17401	8.81773	8.98037	8.61549	8.93283	8.95851	9.03633
ENSMUSG00000017418	0.531792	0.0119464	0.684659	0.010752	0.472521	0.0912021	y	2	lower	PM	7.2142	7.28842	7.23329	7.17145	7.39665	7.31931	6.84895	7.00626	6.8521	7.04639	7.13972	7.39941
ENSMUSG00000017720	0.0654826	0.178859	0.158806	0.0187818	0.881661	0.0663052	n	2		PM	9.79667	9.79895	10.025	10.0349	10.2675	10.0968	9.77219	9.70174	9.69799	9.89287	10.1974	10.2461
ENSMUSG00000017733	0.626037	0.00400214	0.561445	0.00830957	0.291709	0.00337002	y	2	higher	PM	8.80398	8.99846	8.98468	8.94311	8.97086	8.98103	9.45823	9.33119	9.4917	8.81715	8.7938	9.00313
ENSMUSG00000017767	0.226293	0.171989	0.39095	0.0887117	0.0621601	0.291373	n	2		PM	9.76445	9.55065	9.72705	9.89529	9.81667	9.70255	9.62367	9.42144	9.12464	9.58195	9.70408	9.50028
ENSMUSG00000026646	0.0481908	0.0613716	0.910527	0.903645	0.11646	0.110097	n	2		PM	6.74715	6.94048	6.98741	6.31606	6.48702	6.69416	6.24692	6.50144	6.68406	6.60999	6.94883	7.18336
ENSMUSG00000026734	0.021729	0.00941001	0.230107	0.418448	0.00562026	0.00247869	n	2		PM	7.79685	7.85576	7.77482	7.15592	7.24205	7.45661	7.05939	7.3229	7.15224	7.78781	7.99269	8.06379
ENSMUSG00000026773	0.0649142	0.0206683	0.00498192	0.27159	0.00543071	0.0162256	n	2		PM	7.45695	7.59393	7.60162	7.22419	7.39996	7.42064	7.27413	7.24251	7.24817	6.39672	6.41751	6.02501
ENSMUSG00000026778	0.772472	0.0214812	0.886193	0.0954582	0.829745	0.0100817	n	2		PM	10.0056	10.0201	10.0033	10.0686	9.807	10.0672	9.807	9.66751	9.75871	10.0092	9.93375	10.0672
ENSMUSG00000026809	0.0543986	0.967625	0.278765	0.0272082	0.101398	0.195255	n	2		PM	11.9293	11.7119	11.7791	12.0623	11.9475	12.0705	11.8752	11.8278	11.7066	11.8798	11.8492	11.9861
ENSMUSG00000026817	0.345141	0.0505978	0.172911	0.225192	0.0610766	0.0174124	n	2		PM	8.20532	7.97605	7.89148	8.03302	7.67914	7.91135	7.79143	7.7135	7.5762	8.43444	8.06149	8.29382
ENSMUSG00000026831	0.0382493	0.0597053	0.00267441	0.306219	0.0010077	0.0105885	n	2		PM	9.68364	9.63059	9.62104	9.54586	9.51757	9.59544	9.49603	9.56579	9.40843	9.79279	9.81572	9.85217
ENSMUSG00000026885	0.925296	0.328917	0.311729	0.408872	0.458506	0.176371	n	2		PM	9.14199	8.92801	8.97862	9.20807	9.04205	8.75321	9.06314	8.85223	8.50306	8.98703	9.2288	9.17157
ENSMUSG00000026922	0.0285091	0.00325546	0.00142997	0.00758694	0.00277266	0.330039	y	2	intermediate	PM	10.4907	10.4227	10.4129	10.3508	10.2393	10.23	10.0033	9.9868	9.84685	9.96016	9.84203	9.81077
ENSMUSG00000026927	0.0388806	0.00936444	0.648624	0.054318	0.98171	0.623046	n	2		PM	10.5229	10.5275	10.5502	10.458	10.4265	10.4907	10.3885	10.3466	10.4167	10.629	10.5617	10.195
ENSMUSG00000027071	0.171832	0.265244	0.283852	0.545468	0.0757391	0.121075	n	2		PM	7.24817	7.0934	7.12983	7.08499	6.69988	6.98876	7.19562	6.91125	6.95656	7.41319	7.55014	7.0934
ENSMUSG00000027286	0.292118	0.135959	0.214517	0.0318012	0.724056	0.0391802	y	2	lower	PM	9.31919	9.49076	9.58669	9.45823	9.63583	9.68037	9.23004	9.31478	9.30996	9.50845	9.60196	9.78438
ENSMUSG00000027338	0.00161896	0.00791681	0.00465182	0.194719	0.0388778	0.5971	n	2		PM	7.98398	8.18041	8.33237	9.38104	9.29843	9.16626	9.29388	8.85539	8.95078	8.87968	9.11341	8.82933
ENSMUSG00000027344	0.897337	0.279907	0.0134441	0.446969	0.0321364	0.00666735	n	2		PM	8.87968	9.14759	9.07291	8.79307	9.02217	9.22338	8.69993	8.96514	8.98037	9.36897	9.55897	9.66198
ENSMUSG00000027355	0.256532	0.332333	0.0337614	0.749111	0.0928012	0.0528326	n	2		PM	11.2764	11.264	11.2321	11.4072	11.4918	11.2321	11.3917	11.4251	11.2098	11.4673	11.6564	11.6899
ENSMUSG00000027357	0.970642	0.236279	0.20155	0.0938219	0.141482	0.692224	n	2		PM	9.20901	9.4315	9.51757	9.27475	9.40479	9.4657	9.49747	9.4989	9.61636	9.42545	9.58589	9.72763
ENSMUSG00000027364	0.0147449	0.0267479	0.00249262	0.171831	0.00686172	0.00229772	n	2		PM	10.6252	10.5788	10.6359	10.9095	11.0026	10.8386	10.8508	10.8555	10.7292	11.206	11.3629	11.2297
ENSMUSG00000027379	0.204103	0.0490802	0.00599641	0.55478	0.136594	0.192331	n	2		PM	10.0566	10.1779	10.188	10.1292	10.365	10.4506	10.2931	10.3551	10.5286	10.4265	10.6117	10.5651
ENSMUSG00000027409	0.203094	0.0754338	0.091393	0.215616	0.231161	0.941368	n	2		PM	9.65301	9.44392	9.42748	9.39743	9.44745	9.18862	9.23776	9.24135	8.83752	9.26642	9.21332	8.78946
ENSMUSG00000027442	0.0455435	0.04424	0.0439483	0.611648	0.27418	0.485278	n	2		PM	11.2929	11.3073	11.3595	11.4714	11.6539	11.5027	11.4791	11.7066	11.5854	11.5118	11.7171	11.7864
ENSMUSG00000027459	0.93261	0.0723168	0.191601	0.0684901	0.180684	0.526325	n	2		PM	9.97563	9.53045	9.61471	9.9891	9.48852	9.697	9.47685	8.97358	8.79802	9.64335	9.329	8.89488
ENSMUSG00000027480	0.00749571	0.00105953	0.00340911	0.0537704	0.174955	0.390833	n	2		PM	10.2446	10.2469	10.3249	9.87311	9.77219	9.95938	9.7507	9.59356	9.68037	9.65989	9.72494	9.84332
ENSMUSG00000027482	0.187772	0.525889	0.0142598	0.151765	0.171567	0.0447967	n	2		PM	9.71926	9.68932	9.72364	9.70936	9.9093	9.87221	9.5496	9.807	9.59356	9.88778	10.0083	9.96832
ENSMUSG00000027489	0.00759859	0.00525424	0.709263	0.86907	0.00899492	0.00288705	n	2		PM	6.23466	6.15392	5.9231	5.56257	5.20513	5.43207	5.40517	5.27191	5.45912	6.18161	6.0681	5.91631
ENSMUSG00000027505	0.368449	0.330191	0.93235	0.162615	0.371121	0.361403	n	2		PM	11.1391	11.0576	11.073	11.268	11.0213	11.2622	11.157	10.848	10.8995	11.0835	10.9948	11.1754
ENSMUSG00000027518	0.325042	0.100249	0.0652756	0.459729	0.0281922	0.0141475	n	2		PM	11.1211	11.0661	11.1351	11.0414	11.1286	10.9393	10.9802	11.0593	10.8895	11.2018	11.336	11.4153
ENSMUSG00000032680	0.0809333	0.0641663	0.461113	0.314421	0.226546	0.11815	n	2		PM	8.97862	8.97584	8.84919	8.78447	8.80545	8.80009	8.75386	8.78946	8.55353	8.78709	8.90346	8.95347
ENSMUSG00000032869	0.00958513	0.0106503	0.0119704	0.887636	0.963333	0.912339	n	2		PM	9.9691	10.1255	10.1364	9.6737	9.74861	9.79074	9.6906	9.74122	9.80249	9.74224	9.69185	9.78536
ENSMUSG00000035295	0.490957	0.00282715	0.00299847	0.00103439	0.00252322	3.79822e-05	y	2	lower	PM	7.7984	7.60714	7.72444	7.8147	7.66918	7.81407	7.24487	7.19001	7.12743	8.27815	8.15659	8.17981
ENSMUSG00000035877	0.614694	0.133705	0.584877	0.244147	0.669736	0.998211	n	2		PM	8.0708	7.85099	7.87052	7.96936	7.56731	7.99464	7.87947	7.37949	7.38178	8.33237	7.92681	6.37694
ENSMUSG00000036401	0.290062	0.0165379	0.689227	0.00943065	0.435234	0.186939	y	2	lower	PM	8.90067	8.93838	9.06803	9.09499	9.11117	8.95778	8.62588	8.65514	8.40895	8.55179	9.0992	9.01499
ENSMUSG00000036924	0.0168133	0.0991846	0.200399	0.0262437	0.281918	0.0332361	y	2	lower	PM	9.89529	9.85768	9.993	10.1768	10.2082	10.188	9.80317	9.74014	9.52289	9.93375	10.0513	10.2222
ENSMUSG00000037307	0.128926	0.52408	0.142012	0.0835401	0.866432	0.0972596	n	2		PM	10.3278	9.8392	10.0188	10.5832	10.3417	10.2776	10.1724	9.96095	9.58283	10.2944	10.3488	10.4987
ENSMUSG00000037708	0.365534	0.893681	0.251452	0.480338	0.0180642	0.238628	n	2		PM	9.35665	9.66108	9.68037	9.34222	9.46146	9.51932	9.43239	9.42457	9.77453	9.73224	9.63932	9.82873
ENSMUSG00000038085	0.000328856	0.281642	0.000497716	0.0900948	0.106841	0.0458817	n	2		PM	9.40525	9.38104	9.4951	9.93659	9.9665	10.0499	9.86352	9.50845	9.46146	10.0139	10.1548	10.1563
ENSMUSG00000038523	0.617955	0.132708	0.341966	0.0671651	0.317151	0.482979	n	2		PM	12.2273	12.0784	12.041	12.2147	12.1227	12.1171	12.0284	12.0097	11.8366	12.055	11.9799	10.772
ENSMUSG00000038987	0.993788	0.190254	0.0248633	0.174567	0.0148243	0.0127973	n	2		PM	8.88041	8.54776	8.59113	8.80398	8.52072	8.69129	8.63015	8.4131	8.17724	9.30405	9.01595	9.13901
ENSMUSG00000040174	0.137794	0.0535055	0.000685471	0.238269	0.00543422	0.00599858	n	2		PM	10.402	10.3342	10.3712	10.316	10.2949	10.1581	10.1664	10.2416	10.0388	10.6593	10.6442	10.7217
ENSMUSG00000041255	0.761343	0.0217728	0.403355	0.0235622	0.342676	0.239934	y	2	lower	PM	8.91608	9.00451	9.11862	9.02011	9.24135	8.89405	8.72639	8.54035	8.39582	8.50036	9.04256	8.95904
ENSMUSG00000041358	0.0429534	0.00512058	0.205707	0.0173096	0.039702	0.0141249	y	2	lower	PM	7.41464	7.12331	7.32833	6.99909	6.84546	7.04788	6.64272	6.73093	6.5322	7.47724	7.35154	7.83488
ENSMUSG00000044042	0.0152313	0.00863708	0.13421	0.215669	0.275703	0.078903	n	2		PM	5.95211	5.9063	6.0326	5.51639	5.61839	5.34327	5.17822	5.47528	5.30527	5.529	5.59224	5.91933
ENSMUSG00000044320	0.817154	0.014949	0.156704	0.0170507	0.163801	0.313185	y	2	lower	PM	11.2512	11.1901	11.218	11.2281	11.2297	11.1844	10.9095	10.8791	10.7256	11.0813	11.1023	10.7702
ENSMUSG00000044405	0.840374	0.0727408	0.0341206	0.081405	0.0409108	0.506165	n	2		PM	9.11073	8.96626	9.10647	8.99165	9.11994	9.03261	8.8204	8.71362	8.3783	8.60413	8.85461	8.79734
ENSMUSG00000044647	0.105846	0.284529	0.631061	0.453155	0.236894	0.370139	n	2		PM	6.97004	7.03982	6.99223	6.74048	6.68651	6.94298	6.94627	6.72221	6.98235	6.72856	7.23329	7.36912
ENSMUSG00000044916	0.258989	0.0498206	0.892076	0.013873	0.433073	0.109126	y	2	lower	PM	9.87805	10.0801	10.1753	10.0459	10.3371	10.2323	9.65198	9.84077	9.70936	9.81077	10.1581	10.2332
ENSMUSG00000046854	0.251583	0.0351687	0.129905	0.0237389	0.227948	0.0264599	y	2	lower	PM	7.72319	7.6556	7.85576	7.85931	7.87433	7.7812	7.50853	7.50038	7.26844	7.81815	8.31486	8.11915
ENSMUSG00000047841	0.717697	0.319605	0.925243	0.567648	0.708724	0.34971	n	2		PM	11.0509	10.8327	10.9303	11.0835	10.5933	10.9458	11.0355	10.5851	10.6182	11.1819	10.9458	10.7306
ENSMUSG00000048038	0.12326	0.267689	0.189408	0.0488381	0.949585	0.0638664	n	2		PM	9.81002	9.44622	9.50742	10.1374	9.79466	9.77959	9.62707	9.29018	9.08434	10.1488	9.89983	9.62421
ENSMUSG00000050592	0.0027751	0.00544813	0.0357119	0.855627	0.0536555	0.053467	n	2		PM	8.24283	8.18282	8.13426	7.69805	7.69164	7.83956	7.69923	7.83956	7.64665	8.04949	7.95265	7.84841
ENSMUSG00000051379	0.00280306	0.0206491	0.283909	0.133178	0.00687275	0.0172542	n	2		PM	6.44272	6.58177	6.68992	5.69913	5.93962	5.63634	5.87559	5.97435	6.24692	6.5292	6.79	7.03759
ENSMUSG00000055897	0.0198427	0.0274484	0.000941538	0.0852994	0.000403149	0.021461	n	2		PM	8.3687	8.39017	8.4295	8.09889	8.07405	8.22576	7.97631	7.92552	7.66278	7.32081	7.32195	7.47393
ENSMUSG00000056486	0.018518	0.00113151	0.745069	0.0106105	0.113095	0.0139248	y	2	lower	PM	10.1488	10.2667	10.3196	9.88907	9.97342	10.06	9.5713	9.73531	9.67949	10.0327	10.2375	10.3516
ENSMUSG00000059173	0.875535	0.0095589	0.119353	0.0159547	0.11334	0.00606973	y	2	lower	PM	10.6012	10.7277	10.7292	10.5758	10.7579	10.6902	10.3727	10.4749	10.3124	10.7163	10.9174	10.9046
ENSMUSG00000063145	0.716866	0.846902	0.285316	0.789475	0.225581	0.259426	n	2		PM	10.1327	10.2137	10.3002	10.0954	10.2931	10.1701	10.1984	10.2431	10.1716	10.169	10.5402	10.4087
ENSMUSG00000063972	0.642259	0.0921125	0.944818	0.19626	0.654294	0.077468	n	2		PM	9.1381	9.14036	9.12138	9.15359	8.86512	9.20807	9.02584	8.71698	8.83251	9.28834	9.04141	9.08789
ENSMUSG00000070708	0.874425	0.0285442	0.0113824	0.0433016	0.0226649	0.952482	y	2	intermediate	PM	11.9086	11.9324	11.9952	11.9252	11.9604	11.936	11.8199	11.6682	11.6682	11.644	11.7791	11.7211
ENSMUSG00000074576	0.48014	0.428969	0.0140883	0.316613	0.0109936	0.0956443	n	2		PM	9.68513	9.66882	9.62707	9.6906	9.65379	9.68587	9.71098	9.55274	9.56579	9.77959	9.73634	9.74861
ENSMUSG00000074673	0.618099	0.0375667	0.952783	0.0487306	0.70286	0.0930499	y	2	lower	PM	10.108	9.91697	9.97667	10.0295	9.94952	9.91394	9.83303	9.77559	9.62865	10.1157	10.0894	9.81774
ENSMUSG00000074771	0.3755	0.0966118	0.414763	0.283337	0.496847	0.604587	n	2		PM	10.8953	11.0947	11.1474	10.8302	10.9369	11.0641	10.844	10.7245	10.9282	10.9458	11.1186	9.48173
ENSMUSG00000074825	0.0469292	0.0248846	0.000232567	0.0342003	0.00936741	0.243447	y	2	lower	PM	9.21046	9.13579	9.2171	8.97862	8.94817	8.73607	8.37451	8.13154	7.74058	8.30317	8.44228	8.39881
ENSMUSG00000078129	0.0342576	0.015211	0.997841	0.0318852	0.150884	0.0102489	y	2	lower	PM	8.09292	8.21436	8.17454	7.84242	8.00876	7.98961	7.61205	7.61884	7.31245	8.0778	8.35684	8.04625
ENSMUSG00000000826	0.949814	0.423155	0.109723	0.565028	0.12383	0.198138	n	2		MI	6.58555	6.35696	6.38836	6.47485	6.20229	6.6246	6.50684	6.16985	6.32797	6.29386	6.06304	5.73623
ENSMUSG00000000827	0.00744354	0.000445408	0.0180325	0.0156526	0.500201	0.103553	y	2	higher	MI	6.75149	6.86121	6.82675	7.04534	7.16341	7.03871	7.24251	7.29703	7.35389	7.13972	7.03045	7.24314
ENSMUSG00000001998	0.244208	0.14774	0.0334355	0.920958	0.205403	0.123791	n	2		MI	6.50937	6.29063	6.37484	6.39475	6.23844	6.0933	6.28831	6.28434	6.18444	6.22093	5.99439	5.98045
ENSMUSG00000002107	0.896042	0.234114	0.278223	0.205375	0.14006	0.118197	n	2		MI	6.77862	7.10111	7.1317	6.90407	6.93827	7.11385	7.24658	7.03871	7.65966	6.8214	6.80772	6.88556
ENSMUSG00000005506	0.267293	0.377402	0.799204	0.711457	0.486012	0.396696	n	2		MI	7.33089	7.31284	7.39445	7.40812	7.34421	7.51861	7.64839	7.2586	7.51822	7.55278	7.27987	7.08702
ENSMUSG00000006494	0.711077	0.277554	0.252696	0.238831	0.327959	0.130161	n	2		MI	6.54142	6.73151	6.69315	6.42578	6.7614	6.64056	6.6158	6.85602	6.9106	6.00391	6.54269	6.55953
ENSMUSG00000006800	0.41966	0.334871	0.713224	0.192694	0.353256	0.659865	n	2		MI	7.25281	7.15821	7.20931	7.2655	7.11913	7.00278	7.39581	7.22097	7.22492	7.15457	7.18176	7.37618
ENSMUSG00000009563	0.307873	0.254622	0.842812	0.590098	0.476503	0.324776	n	2		MI	6.65091	6.80016	6.79738	6.74233	6.82967	6.95536	6.80952	6.81021	7.12659	6.46185	6.7453	6.94358
ENSMUSG00000014353	0.000492597	0.0265561	7.78299e-05	0.299148	0.247578	0.453321	n	2		MI	6.27502	6.23797	6.23233	6.51048	6.57555	6.52813	6.49641	6.68992	6.71139	6.55086	6.58484	6.57235
ENSMUSG00000014355	0.334518	0.0999758	0.754186	0.335651	0.780329	0.361801	n	2		MI	7.41391	7.42212	7.45755	7.49957	7.58299	7.4051	7.47204	7.6275	7.6275	7.30623	7.46374	7.62229
ENSMUSG00000015090	0.28727	0.128623	0.000880558	0.842906	0.00255329	0.00113267	n	2		MI	9.36024	9.50845	9.77876	10.0388	9.91121	9.4786	9.87493	9.79182	9.87705	8.01285	7.9008	8.20827
ENSMUSG00000016458	0.432625	0.096769	0.987918	0.153907	0.428216	0.104979	n	2		MI	8.04416	8.18335	8.11975	8.16652	8.0708	8.42133	8.71121	8.24846	8.73102	8.11719	8.1085	8.12364
ENSMUSG00000016921	0.474637	0.200612	0.226109	0.0832365	0.366241	0.0400852	n	2		MI	9.73178	10.0012	9.99573	9.76564	9.87705	9.84817	9.95138	10.0954	10.2722	9.59924	9.8008	9.83211
ENSMUSG00000017144	0.434104	0.0156697	0.0696499	0.0226312	0.123872	0.616018	y	2	higher	MI	5.6167	5.80598	5.88604	5.75716	5.95211	5.85716	6.0952	6.19904	6.36102	5.90225	6.25841	6.2603
ENSMUSG00000018326	0.02489	0.0450246	0.116728	0.453125	0.713152	0.830496	n	2		MI	8.13154	7.85173	7.75274	8.87436	8.3369	8.65139	9.29702	8.42701	8.89061	9.43818	8.5855	8.29822
ENSMUSG00000018770	0.00308435	0.000175939	0.214765	0.000666846	0.0889708	0.00705306	y	2	higher	MI	10.7922	10.8114	10.7145	11.0429	11.0593	10.991	11.3139	11.3011	11.3754	10.8059	10.8258	10.982
ENSMUSG00000023224	0.968853	0.533545	0.0758426	0.444856	0.065868	0.0621323	n	2		MI	8.02558	8.12806	8.45919	8.26917	8.34084	8.02318	8.27241	8.34031	8.29382	7.39884	7.82512	7.90798
ENSMUSG00000025780	0.0544433	0.891083	0.115124	0.0597746	0.00974442	0.167772	n	2		MI	5.6003	5.5897	5.6167	5.37619	5.02753	5.16074	5.7896	5.3705	5.70621	5.69108	5.96676	6.08373
ENSMUSG00000026643	0.0234126	0.247663	0.0809772	0.0819659	0.152176	0.500368	n	2		MI	8.7498	8.809	8.81324	9.24913	9.05084	9.28037	8.95633	8.7676	9.06537	9.01	8.89061	9.14036
ENSMUSG00000026662	0.611946	0.087145	0.46798	0.525238	0.346673	0.0721822	n	2		MI	5.92749	6.01009	6.02988	5.84706	5.93708	6.064	5.93564	5.89802	5.86815	6.05322	5.95008	6.09178
ENSMUSG00000026664	0.434414	0.812997	0.240912	0.480674	0.396755	0.269912	n	2		MI	6.71892	6.91125	6.9413	6.69988	6.70048	6.91252	6.86189	6.75452	6.89258	6.50144	6.37369	6.90869
ENSMUSG00000026712	0.677193	0.023816	0.866624	0.0199324	0.753785	0.281965	y	2	higher	MI	7.97971	7.92246	8.01009	7.89291	8.0358	7.91295	8.11719	8.17239	8.27444	7.78843	7.95805	8.24212
ENSMUSG00000026728	0.237241	0.00984021	0.781388	0.0316312	0.125335	0.00806341	y	2	higher	MI	8.64095	8.96785	9.00857	8.97689	9.1125	9.10093	9.55274	9.62293	9.99763	8.67113	8.79884	9.01107
ENSMUSG00000026797	0.0651572	0.104466	0.000956301	0.90408	0.202202	0.347229	n	2		MI	6.60555	6.53424	6.49297	7.04107	6.71085	6.84895	7.09396	6.65876	6.90939	7.12211	6.98094	7.02132
ENSMUSG00000026843	0.263066	0.195303	0.440563	0.752679	0.977148	0.792795	n	2		MI	6.01645	6.32869	6.39191	6.23557	6.7063	6.49641	6.30896	6.50309	6.83401	6.06074	6.51196	6.84112
ENSMUSG00000026869	0.726136	0.00699141	0.493347	0.0446704	0.747697	0.0438032	y	2	higher	MI	7.53339	7.56877	7.55727	7.57794	7.60162	7.40417	7.71907	7.78571	7.80445	7.42662	7.428	7.63323
ENSMUSG00000026878	0.192277	0.274283	0.223121	0.78896	0.065786	0.137835	n	2		MI	8.50879	8.65196	8.65033	8.783	8.61078	8.91007	8.83189	8.56006	9.05835	8.53831	8.36674	8.56441
ENSMUSG00000026879	0.441765	0.0247487	0.304985	0.0127734	0.0906325	0.00808372	y	2	higher	MI	7.47079	7.74058	7.99325	7.861	8.03097	7.76326	8.31544	8.34485	8.61363	7.28304	7.42662	7.76326
ENSMUSG00000026888	0.0565578	0.00410562	0.0350258	0.0187508	0.120676	0.929299	y	2	intermediate	MI	6.71533	6.51048	6.52418	6.85455	6.86257	6.71085	7.22036	7.0071	7.13465	6.88625	7.17909	7.33929
ENSMUSG00000026914	0.202189	0.000725561	0.0594204	0.238462	0.560378	0.00603298	n	2		MI	9.55065	9.50423	9.46678	9.72705	9.80249	9.49747	9.81077	9.87311	9.79466	9.57028	9.59166	9.67056
ENSMUSG00000026930	0.0101367	0.337672	0.00626563	0.415272	0.0540965	0.0618038	n	2		MI	6.86121	6.87227	6.98157	6.64872	6.71651	6.63927	6.82373	6.57492	6.92488	6.32184	6.54348	6.44272
ENSMUSG00000026987	0.0790419	0.00662002	0.243123	0.0146623	0.595888	0.164324	y	2	lower	MI	6.70144	6.63838	6.65091	6.55026	6.62529	6.60555	6.33797	6.40623	6.4598	6.44272	6.51795	6.68406
ENSMUSG00000026991	0.860471	0.0480498	0.0646662	0.0514251	0.0695206	0.438204	n	2		MI	5.89157	5.98505	5.86815	5.94067	5.86815	5.91229	6.04182	6.09	6.23355	6.05718	6.21962	6.37118
ENSMUSG00000027007	0.22969	0.16899	0.365022	0.0646487	0.913622	0.0865985	n	2		MI	7.73697	7.67664	7.67947	7.60214	7.41842	7.68017	8.01563	7.71254	8.09646	7.55068	7.32781	7.76982
ENSMUSG00000027082	0.497325	0.215886	0.20094	0.624372	0.488521	0.710864	n	2		MI	5.41621	5.68737	5.65401	5.65584	5.8534	5.53196	5.63634	5.78038	5.79797	5.67489	5.69913	5.97307
ENSMUSG00000027108	0.153035	0.0702994	0.00425847	0.224735	0.00101867	0.00145207	n	2		MI	7.70913	7.88725	7.95008	7.63323	7.67792	7.76982	7.56131	7.66332	7.63627	7.22608	7.27756	7.14591
ENSMUSG00000027109	0.0664246	0.0265699	0.145762	0.198557	0.592456	0.674939	n	2		MI	6.9692	7.16362	7.22941	7.25229	7.54445	7.43712	7.52818	7.51384	7.86946	7.21861	7.51861	7.87002
ENSMUSG00000027111	0.289741	0.111063	0.264807	0.156891	0.0204694	0.00611115	n	2		MI	6.38431	5.55831	5.70745	6.33453	6.2741	6.1231	6.74715	6.28831	6.53677	5.7631	5.41932	5.28389
ENSMUSG00000027180	0.947317	0.589342	0.651536	0.443154	0.633105	0.310633	n	2		MI	8.26976	8.50233	8.61599	8.3369	8.54644	8.47928	8.39524	8.56441	8.65308	8.21436	8.42445	8.54416
ENSMUSG00000027184	0.211101	0.0540638	0.655329	0.30931	0.505577	0.178353	n	2		MI	10.1374	10.2543	10.1642	10.2	10.2569	10.3196	10.2722	10.2931	10.3727	10.2636	10.2636	10.1167
ENSMUSG00000027189	0.00765252	0.0661144	0.033486	0.652294	0.0940696	0.130114	n	2		MI	6.93396	6.97246	6.96058	7.16064	7.16621	7.25036	7.16125	7.15287	7.38878	7.35801	7.40108	7.67861
ENSMUSG00000027193	0.280022	0.233889	0.438021	0.832414	0.93009	0.955168	n	2		MI	8.53652	8.41663	8.5451	8.54344	8.66709	8.51933	8.50191	8.67825	8.59613	8.42259	8.61599	8.71936
ENSMUSG00000027199	0.151461	0.0179311	0.742742	0.061999	0.247012	0.0245939	n	2		MI	8.65984	9.08789	9.03261	9.07412	9.28365	9.29258	9.83482	9.4142	9.88907	9.23932	8.98103	8.76305
ENSMUSG00000027203	0.0491411	0.779872	0.120995	0.227931	0.0852474	0.121553	n	2		MI	9.01428	9.04997	9.07705	9.08789	9.11479	9.14478	9.11073	9.04353	8.93689	8.59897	8.65033	8.97797
ENSMUSG00000027206	0.838533	0.915238	0.468142	0.992325	0.59328	0.691093	n	2		MI	9.19292	9.27853	9.28834	9.16626	9.33119	9.30143	9.0992	9.26389	9.43239	9.18862	9.33649	9.42289
ENSMUSG00000027285	0.694895	0.285339	0.984511	0.313425	0.78161	0.41004	n	2		MI	5.31299	5.58575	5.69108	5.37996	5.44357	5.59874	5.25531	5.31715	5.50532	5.2319	5.58129	5.76462
ENSMUSG00000027303	0.185155	0.000701308	0.21478	0.110114	0.413734	0.968317	n	2		MI	6.87889	6.90407	6.9222	6.9793	6.92012	7.08253	7.12461	7.08499	7.14073	6.97164	7.02836	7.36702
ENSMUSG00000027323	0.00841354	0.0155386	0.0356362	0.353102	0.18192	0.37803	n	2		MI	7.35154	7.428	7.38557	7.64125	7.74875	7.61564	7.63627	7.83321	7.76142	7.67989	7.88087	8.01956
ENSMUSG00000027365	0.532507	0.371263	0.40618	0.633889	0.643911	0.965804	n	2		MI	6.08274	6.43088	6.45643	6.21504	6.53928	6.54983	6.23722	6.5382	6.85906	6.16698	6.60479	6.90093
ENSMUSG00000027367	0.73601	0.0091089	0.738613	0.0554893	0.59098	0.101132	n	2		MI	8.51742	8.59377	8.65196	8.55237	8.69012	8.42538	8.88672	8.79928	8.80979	8.46911	8.65754	8.7329
ENSMUSG00000027381	0.561773	0.563803	0.129941	0.929997	0.131684	0.166146	n	2		MI	5.60558	5.59874	5.56932	5.65721	5.56932	5.37261	5.72625	5.41932	5.41621	5.83742	5.72147	5.63814
ENSMUSG00000027423	0.133219	0.0402271	0.0185236	0.286157	0.0917049	0.382633	n	2		MI	6.89258	7.10243	7.12419	7.08702	7.31245	7.40233	7.24438	7.47579	7.59889	7.39665	7.59081	7.77482
ENSMUSG00000027427	0.212409	0.660893	0.263992	0.752956	0.448231	0.390063	n	2		MI	6.03975	5.83382	5.86466	6.00391	6.01952	6.05718	6.03572	5.74126	6.16698	6.50228	6.2852	5.84027
ENSMUSG00000027443	0.0583325	0.00956236	0.164681	0.00359244	0.981923	0.00575922	y	2	higher	MI	10.9886	11.1611	11.1147	10.8733	10.9963	10.8508	11.399	11.644	11.5789	10.7404	10.9282	11.0445
ENSMUSG00000027445	0.118107	6.73399e-05	0.0992369	0.00318699	0.446445	0.0190042	y	2	higher	MI	11.1078	11.2037	11.1844	11.2929	11.4022	11.2098	11.8574	11.9109	11.8154	11.2393	11.399	11.5186
ENSMUSG00000027447	0.00778461	4.00513e-05	0.064179	0.00496547	0.884164	0.0611904	y	2	higher	MI	10.0361	10.0906	10.1282	10.5393	10.4802	10.3622	10.822	10.9157	10.9046	10.3233	10.4212	10.6961
ENSMUSG00000027452	0.343745	0.0656876	0.0387583	0.0425603	0.0329093	0.0173099	y	2	higher	MI	7.01859	7.03531	7.01076	7.04399	6.96661	6.88688	7.15348	7.074	7.18404	6.47001	6.45462	6.74715
ENSMUSG00000027463	0.319435	0.0055073	0.0641311	0.106149	0.96833	0.00447775	n	2		MI	8.46256	8.47701	8.46698	8.60497	8.7676	8.42445	8.82399	8.8394	8.92434	8.54246	8.6585	8.58229
ENSMUSG00000027478	0.760746	0.172806	0.870873	0.177646	0.979675	0.432698	n	2		MI	5.8439	5.78394	5.78153	5.68939	5.88845	5.76905	5.81025	5.93016	5.99548	5.53612	5.79797	6.00055
ENSMUSG00000027566	0.689388	0.0842377	0.568435	0.108355	0.435363	0.160775	n	2		MI	7.99939	8.34084	8.3216	8.12426	8.46025	8.26773	8.42133	8.53	8.6632	7.62363	8.15998	8.39156
ENSMUSG00000027620	0.411036	0.153255	0.438707	0.344424	0.900486	0.463505	n	2		MI	7.59256	7.91898	7.94341	7.76647	8.10271	8.00102	7.95213	8.06149	8.44097	7.68287	8.10271	8.15716
ENSMUSG00000033096	0.862193	0.0215638	0.303132	0.111586	0.323058	0.0313782	n	2		MI	6.76522	6.9106	6.80582	6.75452	7.00626	6.77287	6.97061	7.05939	7.11513	6.62999	6.65313	6.87227
ENSMUSG00000033943	0.26837	0.0998256	0.11072	0.15529	0.287148	0.770072	n	2		MI	5.79797	5.52033	5.52298	5.67155	5.84981	5.74503	5.88277	5.80796	5.90762	5.87789	5.91933	5.74267
ENSMUSG00000035949	0.130398	0.0145025	0.393105	0.241563	0.749069	0.281399	n	2		MI	6.23943	6.20956	6.03449	6.43501	6.19817	6.46894	6.54348	6.4092	6.57413	6.52287	6.35398	6.05838
ENSMUSG00000036617	0.251638	0.105185	0.0403744	0.202823	0.0588155	0.523322	n	2		MI	6.5301	6.88287	6.87889	6.80819	6.99729	7.06256	7.33225	7.02463	7.87768	7.09551	7.25736	7.30232
ENSMUSG00000036893	0.0280105	0.0201531	0.846207	0.0314105	0.559574	0.103397	y	2	higher	MI	7.50038	7.51978	7.49236	7.65659	7.61084	7.57849	7.89994	7.74466	7.90318	7.73697	7.53774	7.31782
ENSMUSG00000037376	0.255828	0.0731462	0.0273489	0.288521	0.0347773	0.0609716	n	2		MI	6.33574	6.40623	6.43873	6.38504	6.47622	6.5301	6.45124	6.55953	6.61995	6.71892	6.76939	7.00278
ENSMUSG00000037902	0.833735	0.0174083	0.306845	0.0167455	0.267038	0.0479884	y	2	lower	MI	5.82322	5.90762	6.01952	5.81025	5.95699	6.04273	5.63029	5.59224	5.39212	5.94067	5.78153	5.72625
ENSMUSG00000038116	0.923757	0.588757	0.0469021	0.790807	0.180467	0.0641514	n	2		MI	7.45385	7.41464	7.39941	7.4672	7.16656	7.68287	7.48965	7.30623	7.67861	7.27521	7.11333	7.05159
ENSMUSG00000038171	0.510628	0.225048	0.389683	0.127485	0.232069	0.777924	n	2		MI	6.07598	6.22756	6.20339	6.0933	6.19174	6.09703	6.16295	6.31342	6.40464	6.11242	6.28334	6.38836
ENSMUSG00000038848	0.0733039	0.111277	0.264504	0.243798	0.702606	0.455223	n	2		MI	7.76527	7.82512	7.80011	7.92814	7.82936	7.91385	8.08454	7.86058	8.15343	7.88132	7.80921	8.09995
ENSMUSG00000039195	0.0281213	0.0200578	0.361511	0.90911	0.0566606	0.0430796	n	2		MI	7.80445	7.89586	7.70762	8.47701	8.30671	8.10105	8.44623	8.37751	8.11513	8.08807	7.78236	7.87318
ENSMUSG00000039671	0.0549638	0.0113063	0.00631602	0.121349	0.0423028	0.191501	n	2		MI	5.36727	5.16074	4.94303	5.85095	5.44637	5.55831	6.01952	5.92608	5.78505	6.47398	6.10405	5.98505
ENSMUSG00000040321	0.000644671	0.0112569	0.00380869	0.752254	0.17577	0.174814	n	2		MI	6.23844	6.3517	6.33694	5.75089	5.87265	5.83633	5.82154	5.73845	5.98354	5.6077	5.62578	5.82026
ENSMUSG00000041997	0.0604287	0.0418491	0.0446932	0.694003	0.959728	0.634791	n	2		MI	7.0843	7.28245	7.33342	7.36545	7.60976	7.66332	7.50128	7.5119	7.79358	7.42858	7.51073	7.68017
ENSMUSG00000042155	0.0125135	0.643699	0.135933	0.118391	0.774078	0.175497	n	2		MI	7.58299	7.60274	7.59108	7.19852	7.32362	7.19852	7.42422	7.40233	7.76189	6.93047	7.11959	7.50243
ENSMUSG00000045503	0.969806	0.494661	0.57165	0.405269	0.49443	0.246882	n	2		MI	7.14963	6.87289	6.80819	7.05817	6.85682	6.93047	7.20931	6.98283	6.9413	7.07713	6.76296	6.70144
ENSMUSG00000045624	0.017935	0.0276803	0.0585959	0.377743	0.0488561	0.0473174	n	2		MI	7.40933	7.38075	7.43186	7.57487	7.67345	7.71479	7.71306	7.63197	7.83871	7.52692	7.44782	7.54214
ENSMUSG00000050645	0.0373297	0.000528782	0.197288	0.00120148	0.461452	0.101052	y	2	higher	MI	10.8687	10.7992	10.761	11.0085	10.9046	10.9267	11.3896	11.5447	11.4524	10.9633	10.9059	11.3571
ENSMUSG00000051396	0.0905427	0.0667471	0.131035	0.553288	0.592147	0.994477	n	2		MI	7.1056	7.12797	7.08826	7.343	7.46134	7.20121	7.1796	7.33342	7.31628	7.19562	7.21861	7.41319
ENSMUSG00000056941	0.0215298	0.0119104	0.151336	0.946282	0.0864231	0.0685132	n	2		MI	6.68651	6.75206	6.72315	6.91516	7.02725	7.09785	6.96661	7.1077	6.98094	6.74419	6.84173	6.93474
ENSMUSG00000058835	0.743166	0.100846	0.825385	0.174315	0.893567	0.127997	n	2		MI	7.16435	7.4855	7.47771	7.16179	7.55014	7.60014	7.55396	7.70689	8.04751	7.20057	7.45862	7.57675
ENSMUSG00000060703	4.64765e-05	0.00170199	0.00376035	0.000112652	0.0186373	0.00747036	y	2	intermediate	MI	10.5468	10.458	10.4788	9.74122	9.77099	9.81314	10.1753	10.2137	10.2345	9.0539	8.85687	9.23317
ENSMUSG00000062098	0.47457	0.0132625	0.0532969	0.0248037	0.0788448	0.855003	y	2	intermediate	MI	5.11173	5.3411	5.2598	5.24131	5.37996	5.28156	5.59736	5.72882	5.91229	5.48243	5.87789	5.98354
ENSMUSG00000063873	0.12912	0.221769	0.468845	0.881573	0.491019	0.489776	n	2		MI	8.0183	7.88322	7.76444	8.40661	7.94681	8.27105	8.55539	7.84841	8.34084	8.30221	7.72585	8.10105
ENSMUSG00000067818	0.116831	9.36745e-06	0.697418	0.0501518	0.124105	9.90728e-06	n	2		MI	9.31605	9.28133	9.2915	9.575	9.34659	9.4917	9.76985	9.7372	9.73343	9.28202	9.31435	9.31071
ENSMUSG00000068040	0.0706437	0.0753828	0.0185294	0.392687	0.0370583	0.185344	n	2		MI	7.78296	7.73113	7.77775	7.47028	7.65216	7.39761	7.49957	7.47522	7.13739	7.03647	7.03478	7.31628
ENSMUSG00000068882	0.851044	0.260638	0.520103	0.296672	0.592612	0.676322	n	2		MI	6.94185	7.26358	7.28761	7.00849	7.25229	7.32027	7.15904	7.39884	7.66061	7.06256	7.23485	7.62363
ENSMUSG00000070544	0.0175268	0.0321976	0.703168	0.0857412	0.126979	0.0272306	n	2		MI	9.02649	9.0182	8.95222	9.11794	9.09148	9.16787	9.40216	9.19769	9.42748	9.08889	8.93617	9.03538
ENSMUSG00000074643	0.441992	0.488734	0.0110849	0.274863	0.134985	0.673702	n	2		MI	7.74307	7.73578	7.75542	7.90846	7.79228	7.70317	7.81407	7.6581	7.60162	7.63895	7.6581	7.68287
ENSMUSG00000074743	0.563206	0.722512	0.0682711	0.907259	0.0582258	0.149951	n	2		MI	4.94303	5.3705	5.34646	5.19397	5.26386	5.53012	5.2319	5.05047	5.63029	5.75982	5.67766	5.6167
ENSMUSG00000078135	0.881095	0.706402	0.728826	0.627031	0.779644	0.556774	n	2		MI	6.78337	6.22967	6.25362	6.59848	6.22035	6.34508	7.19189	6.18009	6.34225	6.8979	6.17923	5.75831
ENSMUSG00000005883	0.637457	0.331172	0.406541	0.228882	0.259557	0.818571	n	2		ME	9.30405	9.4429	9.48308	9.31919	9.42342	9.39022	9.34902	9.63059	9.61261	9.34659	9.54179	9.61471
ENSMUSG00000014959	0.180162	0.234327	0.541793	0.921023	0.963085	0.995236	n	2		ME	10.2469	10.2722	10.258	10.2323	10.1167	10.2137	10.1452	10.163	10.2714	10.3634	10.1618	10.0523
ENSMUSG00000015083	0.0544011	0.0813059	0.00407153	0.698657	0.0212215	0.0155843	n	2		ME	8.81275	8.51933	8.61012	8.97447	9.01	8.85412	8.79437	9.039	8.89776	9.30509	9.26642	9.54179
ENSMUSG00000015095	0.813475	0.927632	0.63424	0.782824	0.566654	0.711399	n	2		ME	10.9369	10.764	10.7404	11.0531	10.6182	10.8791	11.0051	10.7179	10.6832	11.0066	10.6182	10.5768
ENSMUSG00000017740	0.198281	0.0359696	0.04992	0.657406	0.0290053	0.00536727	n	2		ME	6.63994	6.63426	6.49641	6.59979	6.37273	6.33128	6.32869	6.47622	6.35974	6.76643	6.71533	6.9015
ENSMUSG00000026655	0.254491	0.0332007	0.0185199	0.0794531	0.022419	0.240406	n	2		ME	9.74224	9.79182	9.79667	9.66751	9.79667	9.63243	9.48443	9.63374	9.46309	9.30232	9.46216	9.489
ENSMUSG00000026672	0.382963	0.164722	0.00988474	0.135626	0.0160754	0.0111448	n	2		ME	9.48443	9.329	9.27475	9.31435	9.25461	9.3092	9.25813	9.25813	9.18347	9.84332	9.73178	10.0139
ENSMUSG00000026679	0.0815182	0.0664017	0.325472	0.946842	0.358472	0.32246	n	2		ME	10.7522	10.8289	10.7573	10.4882	10.6706	10.658	10.4907	10.6729	10.6359	10.5749	10.719	10.7942
ENSMUSG00000026743	0.0390081	0.264724	0.293868	0.377724	0.283429	0.886698	n	2		ME	9.91121	10.0423	10.0555	10.109	10.224	10.2469	9.9891	10.224	10.1225	9.97806	10.1274	10.188
ENSMUSG00000026790	0.0746949	0.0756879	0.502592	0.00821257	0.0742317	0.344539	n	2		ME	11.888	11.9141	11.8492	11.8492	11.8278	11.7903	11.9109	11.9571	11.9737	11.9571	11.8574	11.9141
ENSMUSG00000026798	0.510843	0.321235	0.664502	0.183061	0.960404	0.323534	n	2		ME	9.1394	9.02649	9.09413	9.1332	9.04416	9.2096	8.9542	9.07066	9.06468	9.19139	8.98242	9.19947
ENSMUSG00000026807	0.514078	0.339461	0.185798	0.558761	0.133395	0.0874484	n	2		ME	11.0907	11.0355	11.1023	11.0755	11.0688	11.03	10.9886	11.0907	11.03	11.073	11.2073	11.1958
ENSMUSG00000026821	0.232019	0.0551173	0.156635	0.333782	0.753837	0.511659	n	2		ME	10.1211	9.63243	9.56847	9.76339	9.13901	9.3502	9.435	9.08967	8.95633	9.70036	9.12138	9.16787
ENSMUSG00000026853	0.521619	0.069788	0.182258	0.212706	0.241958	0.482235	n	2		ME	11.0576	10.9802	10.9458	11.0261	10.8768	10.9653	10.9267	10.7992	10.8862	10.9748	10.7594	10.5813
ENSMUSG00000026854	0.58745	0.208766	0.232522	0.400817	0.305706	0.435052	n	2		ME	8.48646	8.00617	7.861	8.21632	7.644	8.04416	7.94733	7.79795	7.58365	8.00041	7.54445	6.3463
ENSMUSG00000026894	0.00674583	0.145417	0.00575481	0.700152	0.0295437	0.0713799	n	2		ME	11.732	11.6846	11.7029	11.8278	11.8922	11.8323	11.7707	11.9324	11.7757	11.9252	12.014	12.0284
ENSMUSG00000026915	0.0346224	0.043268	0.0183899	0.428859	0.232593	0.752033	n	2		ME	9.36721	9.4565	9.4458	9.50516	9.63243	9.58942	9.56191	9.60008	9.74485	9.5874	9.6465	9.7468
ENSMUSG00000026918	0.977084	0.797968	0.528902	0.840161	0.565293	0.662711	n	2		ME	10.081	9.51158	9.49832	10.0092	9.22135	9.83211	10.0305	9.34386	9.48308	10.0583	9.17685	9.08967
ENSMUSG00000026925	0.832092	0.657613	0.0821654	0.877889	0.0701536	0.0814512	n	2		ME	8.3216	8.20945	8.01069	8.29329	7.96417	8.19379	8.16149	8.0968	8.14156	8.5761	8.35743	8.85158
ENSMUSG00000026933	0.128728	0.105925	0.155258	0.919521	0.0350774	0.0309742	n	2		ME	8.67113	8.61267	8.55102	8.55179	8.27562	8.44097	8.55863	8.3768	8.29697	8.85223	8.63058	8.93689
ENSMUSG00000026994	0.607642	0.101186	0.126834	0.432588	0.174349	0.0230918	n	2		ME	9.48949	9.61765	9.57281	9.35519	9.66751	9.48694	9.3092	9.50742	9.4073	9.58589	9.71186	9.75683
ENSMUSG00000027001	0.00200367	0.0105565	0.000264859	0.709453	0.000338594	0.00342837	n	2		ME	8.82854	8.88819	8.91905	7.89148	8.10709	7.93105	7.74912	8.13563	7.88466	6.80342	6.88688	7.03104
ENSMUSG00000027030	0.300571	0.216559	0.0237132	0.811625	0.0381549	0.0483098	n	2		ME	10.4366	10.3816	10.3342	10.2872	9.95502	10.3784	10.2806	9.90708	10.2949	9.69185	9.42748	9.85841
ENSMUSG00000027088	0.161993	0.199643	0.115492	0.90648	0.534474	0.639086	n	2		ME	11.2487	11.3784	11.2892	11.0008	11.177	11.2609	11.0085	11.1971	11.2745	11.2098	11.1982	11.2018
ENSMUSG00000027157	0.0077614	0.003872	0.011906	0.152375	0.112729	0.273859	n	2		ME	8.61741	8.88253	8.91721	8.01644	8.23109	8.28327	7.97134	7.91295	8.10497	7.38603	7.91826	7.90585
ENSMUSG00000027165	0.128225	0.389386	0.718224	0.61727	0.267322	0.411353	n	2		ME	10.6271	10.7046	10.6442	10.5076	10.6431	10.5131	10.5076	10.7046	10.5708	10.5198	10.7336	10.8423
ENSMUSG00000027177	0.11832	0.121705	0.285435	0.0274744	0.867206	0.0987662	n	2		ME	10.2636	10.1863	10.1274	10.3946	10.2222	10.361	10.1548	10.0523	10.0695	10.4459	10.169	10.3112
ENSMUSG00000027209	0.165104	0.100724	0.0452481	0.639361	0.458243	0.855811	n	2		ME	8.92608	9.25535	9.36787	8.55047	9.05617	8.91721	8.40002	8.91124	8.87349	8.49233	8.76305	8.81593
ENSMUSG00000027221	0.789238	0.104405	0.0636296	0.130649	0.0859827	0.976642	n	2		ME	8.83149	8.66194	8.63404	8.81593	8.62475	8.60897	8.59613	8.47426	8.23849	8.59773	8.40259	8.32106
ENSMUSG00000027227	0.0563738	0.0621263	0.0149623	0.96843	0.354944	0.394297	n	2		ME	12.1864	12.33	12.3493	12.4111	12.4797	12.6187	12.3916	12.5106	12.6187	12.5277	12.6904	12.5433
ENSMUSG00000027229	0.162544	0.20461	0.432654	0.865428	0.159325	0.143501	n	2		ME	6.94048	6.91667	7.05559	6.89848	6.91789	6.82221	6.77217	6.94883	6.88488	6.95386	6.99223	7.22164
ENSMUSG00000027282	0.82952	0.123531	0.0330645	0.416674	0.499461	0.0104396	n	2		ME	11.9396	11.9524	11.9169	11.9444	11.9884	11.8444	11.9952	11.9604	11.9524	11.9029	11.8978	11.8714
ENSMUSG00000027284	0.492035	0.0263427	0.118424	0.0582549	0.22073	0.0425925	n	2		ME	9.03336	9.08245	9.11341	9.04491	9.10743	9.18636	8.97086	8.9598	8.94311	9.11341	9.22587	9.3092
ENSMUSG00000027316	0.0220334	0.0485686	0.0165096	0.308143	0.0412083	0.0801613	n	2		ME	7.88925	7.68858	7.7004	7.5554	7.36242	7.39176	7.30919	7.45095	6.98046	6.72055	6.43218	7.02463
ENSMUSG00000027327	0.999406	0.766743	0.696399	0.759107	0.688403	0.911085	n	2		ME	10.9393	10.386	10.286	10.8926	10.2461	10.4733	10.87	10.2618	10.1984	10.8733	10.2569	10.0854
ENSMUSG00000027329	0.0450707	0.0400079	0.452	0.533747	0.264774	0.152018	n	2		ME	6.82541	6.65698	6.50228	6.35613	6.35398	6.03097	5.96598	6.40363	6.01009	6.38079	6.30786	6.82092
ENSMUSG00000027378	0.164688	0.708712	0.423015	0.139723	0.22858	0.510836	n	2		ME	11.4595	11.5321	11.5272	11.4466	11.4188	11.4918	11.4673	11.5272	11.5701	11.5272	11.488	11.7417
ENSMUSG00000027475	0.217544	0.128862	0.347345	0.337916	0.432778	0.467921	n	2		ME	9.21414	9.07569	8.97689	8.98037	8.92392	9.00313	8.98468	8.91434	8.88253	9.05325	8.90691	7.50709
ENSMUSG00000027498	0.459458	0.172338	0.562766	0.420918	0.82648	0.29286	n	2		ME	8.64219	8.40486	8.31544	8.50742	8.31544	8.22393	8.32028	8.31486	8.12757	8.51791	8.35494	8.25371
ENSMUSG00000027569	0.00458201	0.22219	0.0158247	0.495213	0.145542	0.12774	n	2		ME	9.79575	9.79991	9.73076	9.59247	9.57621	9.64027	9.54586	9.65301	9.77959	9.41124	9.49747	9.57904
ENSMUSG00000027634	0.00714587	0.00482985	0.118499	0.104917	0.438915	0.093597	n	2		ME	9.81457	9.75785	9.74304	9.62591	9.63138	9.59166	9.47271	9.57281	9.55782	9.74861	9.63583	9.59652
ENSMUSG00000027649	0.12873	0.727781	0.00768947	0.397142	0.0563531	0.0629703	n	2		ME	10.1157	9.993	9.9559	10.2522	10.1618	10.0659	10.1743	10.1184	9.88663	10.4351	10.2986	10.3088
ENSMUSG00000033068	0.236761	0.134912	0.872872	0.604979	0.333422	0.203457	n	2		ME	9.48624	9.32723	9.28876	9.39685	9.09053	9.11794	9.29843	9.13579	8.92608	9.67125	9.31071	9.20156
ENSMUSG00000033213	0.00942229	0.101314	0.00287051	0.728669	0.0428171	0.530121	n	2		ME	11.644	11.5854	11.5579	11.7119	11.7812	11.7707	11.6773	11.9141	11.7576	11.8092	11.8366	11.8613
ENSMUSG00000033368	0.889623	0.577476	0.0464295	0.496213	0.0418087	0.0796153	n	2		ME	10.0423	10.2169	10.2198	10.0794	10.2618	10.1012	10.0848	10.31	10.2461	10.3018	10.5527	10.5685
ENSMUSG00000033486	0.0277824	0.00713986	0.655719	0.884535	0.0355749	0.0149535	n	2		ME	9.81572	9.91585	9.87621	9.6465	9.72629	9.5483	9.60262	9.71015	9.63674	9.86585	9.77791	9.89733
ENSMUSG00000033902	0.245636	0.111626	0.0160018	0.528707	0.044471	0.0750571	n	2		ME	8.86013	8.563	8.53386	9.02146	8.75386	8.7464	8.98993	9.01153	8.7676	9.18768	9.08889	9.43001
ENSMUSG00000034075	0.0101017	0.036106	0.155142	0.343454	0.261994	0.323883	n	2		ME	10.1838	10.2013	10.2233	9.99573	10.0132	10.0785	9.88553	9.9559	10.0574	9.87976	9.90375	9.13416
ENSMUSG00000034226	0.341609	0.384245	0.982003	0.992034	0.1302	0.247287	n	2		ME	6.02988	6.37273	6.18583	6.06304	6.05141	6.10666	5.93016	6.16922	6.12425	6.23943	6.26279	6.09445
ENSMUSG00000034552	0.677342	0.967435	0.0347342	0.686438	0.0928052	0.0487149	n	2		ME	8.99165	9.23932	9.33253	8.97584	9.3283	9.51535	8.89166	9.31749	9.33119	9.47205	9.81002	9.91316
ENSMUSG00000034800	0.951319	0.304573	0.0121145	0.321231	0.0123867	0.120672	n	2		ME	6.3116	6.3657	6.55637	6.2603	6.54647	6.44876	6.3116	6.84263	6.7614	6.86976	7.0158	7.24728
ENSMUSG00000034848	0.0144321	0.0391651	0.00106258	0.660134	0.0111137	0.018596	n	2		ME	9.63932	9.75576	9.74485	9.89201	9.94541	9.95031	9.82387	9.89529	9.99145	10.1002	10.1245	10.2144
ENSMUSG00000036833	0.00557814	0.148867	0.399657	0.573056	0.560369	0.388881	n	2		ME	9.08836	9.04416	9.0992	8.93964	8.97862	8.9196	8.78881	9.05527	8.8255	8.96785	9.1394	8.88672
ENSMUSG00000036890	0.0428675	0.0857538	0.00912502	0.814053	0.050934	0.0466048	n	2		ME	8.81466	9.00857	8.9598	9.09369	9.34051	9.18028	9.00359	9.24511	9.28037	9.36247	9.59052	9.68587
ENSMUSG00000036992	0.596582	0.504638	0.0823269	0.667119	0.0138185	0.52352	n	2		ME	10.7336	10.7626	10.6182	10.7107	10.6621	10.6562	10.5708	10.7954	10.5415	10.6004	10.5415	10.5801
ENSMUSG00000037279	0.321476	0.166725	0.238348	0.080521	0.765116	0.0636344	n	2		ME	8.50809	8.50706	8.46256	8.57485	8.48	8.8234	8.15033	8.44228	8.34403	8.75042	8.45778	8.81408
ENSMUSG00000037683	0.149646	0.92351	0.14328	0.0937472	0.934648	0.0732362	n	2		ME	10.2949	10.3689	10.4034	10.4034	10.4071	10.4694	10.3946	10.365	10.3196	10.4167	10.4256	10.4438
ENSMUSG00000038605	0.432518	0.495864	0.0576469	0.0259748	0.018627	0.00276481	y	2	lower	ME	7.85363	7.55775	7.33162	7.81058	7.65008	7.72839	7.53596	7.48965	7.33225	8.22654	7.97536	8.08525
ENSMUSG00000038932	0.900598	0.768763	0.532524	0.660094	0.60436	0.339832	n	2		ME	11.797	11.9987	12.0041	11.797	12.0208	11.9444	11.8613	11.9952	12.0237	11.7634	11.9952	11.8444
ENSMUSG00000039021	0.0379009	0.0250967	0.0691538	0.352138	0.585342	0.219469	n	2		ME	9.15641	9.40952	9.41603	8.87853	9.08564	9.01	8.67039	8.98834	8.93964	8.90295	9.10439	9.13579
ENSMUSG00000039254	0.894744	0.46395	0.10763	0.621551	0.109892	0.167595	n	2		ME	10.3222	10.4057	10.3697	10.3739	10.2543	10.4431	10.3076	10.2275	10.4129	10.2872	10.1396	9.993
ENSMUSG00000039715	0.32648	0.011741	0.0447893	0.901729	0.618847	0.24784	n	2		ME	9.18028	9.12041	9.13579	9.33528	9.07705	9.44488	9.31274	9.25319	9.24511	9.39326	9.25016	9.41504
ENSMUSG00000040794	0.000602228	0.0803015	0.217025	0.673831	0.0475643	0.0260539	n	2		ME	11.3784	11.369	11.4306	11.615	11.6649	11.6682	11.5321	11.8613	11.6948	11.2815	11.3436	11.0085
ENSMUSG00000043535	0.449202	0.113259	0.402588	0.209786	0.381323	0.346196	n	2		ME	10.9898	11.177	11.2172	11.1078	11.2375	11.253	11.3098	11.2172	11.4569	11.0755	11.0531	7.49638
ENSMUSG00000043583	4.57927e-05	0.0270871	0.0880167	0.144163	0.239943	0.862279	n	2		ME	6.56985	6.35062	6.43379	4.67314	4.69098	4.83037	4.98666	5.70621	5.06445	4.61909	5.55556	5.82451
ENSMUSG00000045106	0.125907	0.0341071	0.0183341	0.237434	0.0999974	0.504193	n	2		ME	6.62378	6.69988	6.73093	6.38654	6.30448	6.63691	6.09907	6.22856	6.42578	5.98505	6.28926	6.19174
ENSMUSG00000045794	0.735759	0.028591	0.165022	0.0907774	0.543729	0.0660164	n	2		ME	11.0708	11.0688	11.0907	11.0641	11.1689	10.9095	10.8258	10.9193	10.772	10.9369	11.0708	10.9595
ENSMUSG00000045822	0.0997037	0.192751	0.323818	0.999501	0.174991	0.447085	n	2		ME	8.173	8.04564	8.04059	7.98996	7.99269	7.93035	7.8889	8.08359	7.94039	7.97687	8.03677	8.06881
ENSMUSG00000046338	0.0040352	0.00274669	0.00157949	0.0252492	0.0223585	0.0993934	y	2	intermediate	ME	8.84692	8.87238	8.94603	9.16533	9.09369	9.12243	9.24731	9.20229	9.2148	9.29948	9.29258	9.42342
ENSMUSG00000048201	0.0170952	0.00303949	0.343449	0.00846425	0.0811131	0.00289511	y	2	lower	ME	8.81891	8.88041	8.88672	8.77086	8.71485	8.76356	8.31337	8.44372	8.44975	8.8204	8.87288	8.78364
ENSMUSG00000048550	0.409507	0.242844	0.199995	0.157916	0.293048	0.0703435	n	2		ME	7.86058	7.95213	7.95314	7.88466	8.05165	7.99234	7.54639	7.93175	7.74737	7.94575	8.13258	8.37041
ENSMUSG00000048707	0.541119	0.15469	0.639769	0.647085	0.840573	0.430507	n	2		ME	10.4601	10.163	10.0649	10.3278	9.70255	10.2	10.1255	9.86768	9.91927	10.3739	9.84004	10.1753
ENSMUSG00000048749	0.173011	0.138479	0.0695601	0.064324	0.402766	0.0351787	n	2		ME	8.82618	8.71876	8.60071	9.17559	8.74469	8.97447	8.66074	8.47352	8.5358	9.40016	8.96178	9.04661
ENSMUSG00000051769	0.906193	0.253737	0.701577	0.288281	0.652543	0.198541	n	2		ME	10.6409	10.5076	10.4862	10.6645	10.5441	10.4554	10.6669	10.8862	10.5494	10.5393	10.3677	10.6175
ENSMUSG00000052533	0.566328	0.160545	0.302055	0.403953	0.46479	0.862483	n	2		ME	9.33929	9.10352	9.07066	9.19139	8.75696	9.23158	9.15189	8.67493	8.76248	9.30143	8.39017	8.72639
ENSMUSG00000056436	0.00901583	0.0166936	0.560788	0.396935	0.217593	0.122652	n	2		ME	10.2595	10.3478	10.3659	10.4771	10.5698	10.5562	10.4896	10.6379	10.6483	10.2553	10.354	10.5468
ENSMUSG00000057047	0.104676	0.328732	0.0713237	0.829461	0.0624055	0.0613693	n	2		ME	10.0583	10.0228	9.94404	10.1894	10.064	10.0919	10.1497	10.1787	9.96232	9.23158	8.64303	7.81357
ENSMUSG00000059540	0.133959	0.255591	0.0298589	0.874185	0.123369	0.15131	n	2		ME	11.5068	11.4072	11.3491	11.5776	11.494	11.5096	11.5096	11.615	11.4251	11.5985	11.5985	11.7521
ENSMUSG00000060445	0.296029	0.110223	0.965658	0.346444	0.481769	0.194105	n	2		ME	10.2714	10.5131	10.51	10.402	10.7127	10.6209	10.5183	10.7737	10.9369	10.1396	10.5902	10.5885
ENSMUSG00000061186	0.757207	0.00258878	0.0157272	0.00329222	0.00653772	0.399636	y	2	intermediate	ME	7.47028	7.5287	7.49465	7.4051	7.55396	7.59785	8.03097	8.07634	7.93394	7.99464	8.05274	8.27177
ENSMUSG00000061411	0.13221	0.00525454	0.00431613	0.128406	0.0429622	0.00382375	n	2		ME	10.2176	10.1396	10.1225	10.081	9.88907	10.0736	9.85217	9.84685	9.87805	9.72008	9.72557	9.72008
ENSMUSG00000063235	0.116348	0.0233149	0.0131719	0.629642	0.116637	0.140331	n	2		ME	11.0105	10.9393	11.0008	10.8687	10.745	10.9303	10.745	10.8687	10.8267	10.7702	10.6165	10.7277
ENSMUSG00000070883	0.274017	0.693272	0.621967	0.444367	0.206895	0.497159	n	2		ME	10.0848	9.97486	9.97563	9.81216	9.52289	10.0378	10.0866	9.71098	10.0672	10.3124	9.88095	10.0626
ENSMUSG00000070953	0.0700044	0.0865731	0.00444249	0.72104	0.98006	0.668035	n	2		ME	10.822	10.8655	10.8364	10.674	10.7067	10.7942	10.6227	10.7833	10.7012	10.7551	10.7067	10.7163
ENSMUSG00000074749	0.600883	0.12332	0.130816	0.509697	0.0895501	0.0435895	n	2		ME	11.0127	11.0105	11.03	10.9948	11.0146	11.1097	11.0499	11.048	11.1128	10.859	10.9074	10.9948
ENSMUSG00000074764	0.0083319	0.00751623	0.803825	0.0402481	0.0176442	0.00348816	y	2	lower	ME	9.62865	9.64027	9.65301	9.2179	9.31071	9.17253	9.07887	9.06213	8.89941	9.48694	9.63243	9.74014
ENSMUSG00000075271	0.224611	0.294928	0.122236	0.645367	0.356595	0.280158	n	2		ME	8.49197	8.8007	8.92608	8.36068	8.59536	8.5888	8.48254	8.57993	8.61509	7.97292	8.35881	8.57539
ENSMUSG00000075302	0.625736	0.139401	0.0863064	0.0746446	0.148982	0.0082825	n	2		ME	10.2569	10.4431	10.4817	10.3417	10.4246	10.5667	10.195	10.2461	10.2618	10.51	10.5933	10.6729
ENSMUSG00000000194	0.0785874	0.0360549	0.00327669	0.268611	0.0119903	0.0557135	n	2			8.06048	7.88828	7.81815	7.82127	7.61564	7.64937	7.66061	7.61954	7.36488	7.36702	7.19562	7.07846
ENSMUSG00000000823	0.69591	0.122367	0.436955	0.494504	0.502328	0.622114	n	2			8.67748	8.6562	8.61187	8.66621	8.55539	8.66947	8.60497	8.5981	8.59474	8.48801	8.32731	8.76248
ENSMUSG00000001767	0.0562556	0.066418	0.0622315	0.888801	0.763317	0.876622	n	2			8.04751	7.98869	8.04676	7.7135	7.90653	7.84525	7.75542	7.79932	7.94681	7.80839	7.78055	7.95158
ENSMUSG00000001855	0.840761	0.213199	0.606104	0.239452	0.483701	0.148786	n	2			8.89776	8.7316	8.79138	8.86309	8.71833	8.79802	8.79734	8.44293	8.63737	8.9021	8.91777	8.73066
ENSMUSG00000002102	0.00767703	0.0176296	0.00703999	0.990544	0.0149213	0.0782733	n	2			12.014	11.9475	11.9693	11.8444	11.8637	11.8225	11.797	11.888	11.8444	11.7521	11.7603	11.7545
ENSMUSG00000002103	0.82876	0.140242	0.155384	0.0907924	0.183479	0.0179073	n	2			6.66037	6.56985	6.44143	6.67364	6.47551	6.58177	6.48043	6.42938	6.30636	6.81143	6.61229	6.69872
ENSMUSG00000002108	0.000112019	0.00327047	0.000231865	0.1014	0.0241145	0.0421774	n	2			6.87713	6.71785	6.85906	8.04949	7.94506	7.95008	7.86946	7.76189	7.54706	8.12607	8.18335	8.10345
ENSMUSG00000002109	0.00703446	0.00815028	0.0543103	0.30943	0.65295	0.830012	n	2			6.49641	6.65812	6.68589	6.97695	7.09685	7.01995	6.9793	7.21128	7.2354	6.96611	6.96661	7.38121
ENSMUSG00000002455	0.441465	0.115421	0.0572585	0.491021	0.0864921	0.151035	n	2			8.10497	7.97971	8.04751	8.14486	8.26197	7.97223	8.10418	8.33096	8.18847	8.28034	8.41417	8.66621
ENSMUSG00000002458	0.00321202	0.189987	0.966662	0.357365	0.0986978	0.265245	n	2			5.82451	5.90401	5.9439	5.32689	5.48705	5.48243	5.31529	5.78505	5.7237	5.56932	6.00055	6.12672
ENSMUSG00000002546	0.243184	0.0302435	0.208905	0.0595257	0.415323	0.402131	n	2			8.22251	8.13426	8.22903	8.34084	8.19626	8.26437	8.58711	8.36674	8.47928	8.52419	8.3867	8.19215
ENSMUSG00000002731	0.547384	0.0416306	0.0915271	0.0276166	0.199972	0.0110613	y	2	higher		8.1605	8.35881	8.3844	8.07691	8.36068	8.25143	8.56228	8.78805	8.99913	7.87052	8.06293	8.18609
ENSMUSG00000002732	0.232729	0.298821	0.414897	0.851895	0.152513	0.178756	n	2			7.81868	8.21001	8.05604	7.46089	7.85309	7.96013	7.54371	7.79292	8.06517	7.80222	8.55353	8.48736
ENSMUSG00000002733	0.60841	0.515278	0.777323	0.844134	0.75339	0.61547	n	2			7.72156	8.07243	8.1444	7.897	8.12264	8.18335	7.96213	8.05328	8.26647	7.86364	8.0757	8.14156
ENSMUSG00000003604	0.109338	0.0283959	0.522122	0.441689	0.654737	0.715169	n	2			11.2837	11.1844	11.1864	11.1844	11.1009	11.046	11.1128	11.0795	11.0085	11.336	11.2993	10.0188
ENSMUSG00000003660	0.0295828	0.00388989	0.0310685	0.111437	0.839912	0.176402	n	2			9.85415	9.7372	9.68513	10.0854	10.0538	9.89983	10.1327	10.2469	10.1066	9.92569	10.0218	10.1472
ENSMUSG00000003662	0.0372879	0.466209	0.0125416	0.147989	0.016026	0.00564788	n	2			8.35438	8.311	8.36526	8.14087	8.20297	8.03302	8.24846	8.41417	8.1819	7.52943	7.78296	7.76276
ENSMUSG00000005233	0.0669968	0.0381941	0.015512	0.163538	0.106724	0.973455	n	2			7.72251	7.93818	7.82802	7.99234	8.31908	8.0923	8.18702	8.70343	8.4561	8.21954	8.5607	8.54644
ENSMUSG00000005804	0.176014	0.00739915	0.0284215	0.0357292	0.0336772	0.0429571	y	2	intermediate		7.95421	8.14645	8.10418	7.93035	7.95805	7.96066	7.69805	7.67011	7.4855	6.35884	5.99363	4.99161
ENSMUSG00000005881	0.310148	0.857333	0.655698	0.234255	0.184752	0.761741	n	2			9.90375	9.68364	9.697	10.0228	9.88778	9.7468	9.82696	9.77959	9.62367	9.85841	9.64892	9.6296
ENSMUSG00000005882	0.0765781	0.0833172	0.00709812	0.012914	0.0224159	0.00275915	y	2	lower		7.26071	7.32563	7.2566	7.40306	7.39517	7.31198	7.25281	7.16996	7.18634	7.52298	7.62453	7.50128
ENSMUSG00000006418	0.140467	0.143613	0.375842	0.411408	0.860936	0.645497	n	2			8.70184	8.77317	8.80243	8.79928	8.88187	8.81366	8.77745	8.98644	8.92661	8.7437	8.80009	8.99846
ENSMUSG00000006476	0.749858	0.0439113	0.546519	0.0256533	0.653648	0.340492	y	2	higher		7.41158	7.6116	7.7009	7.57393	7.72839	7.52978	7.78739	7.96535	7.92489	7.55841	8.01121	7.51861
ENSMUSG00000007659	0.61913	0.233431	0.520683	0.343362	0.56904	0.689825	n	2			7.63063	7.22377	7.25036	7.41464	7.32081	7.10931	7.2312	7.2455	6.8052	7.48764	7.64478	4.91922
ENSMUSG00000008200	0.0301501	0.193553	0.00185182	0.123684	0.143576	0.024193	n	2			8.59613	8.66487	8.54246	8.19798	8.07458	7.80222	8.16921	8.31337	8.60151	7.69106	7.69687	7.90367
ENSMUSG00000008333	0.216664	0.0135015	0.0314182	0.0629324	0.413303	0.107707	n	2			9.39216	9.52119	9.46146	9.45752	9.64824	9.57028	9.65301	9.83372	9.7803	9.59785	9.67949	9.57787
ENSMUSG00000009030	0.413325	0.14969	0.384001	0.393329	0.728651	0.854994	n	2			6.30718	6.56162	6.60306	6.44792	6.66249	6.69179	6.57672	6.72402	6.78635	6.47855	6.55953	6.95309
ENSMUSG00000009549	0.0689962	0.0213226	0.728257	0.364406	0.100268	0.0295661	n	2			11.3436	11.4569	11.4093	11.5027	11.615	11.4852	11.5186	11.6491	11.6071	11.3848	11.3896	11.488
ENSMUSG00000010492	0.0530393	0.0294225	0.00400136	0.756361	0.00903845	0.00552557	n	2			7.29703	7.21731	7.38247	7.1392	6.82861	6.99051	6.95309	7.08318	6.80116	7.74912	7.64125	7.65607
ENSMUSG00000010914	0.740234	0.926436	0.00716846	0.712803	0.0733116	0.0243862	n	2			9.42961	9.23776	9.35665	9.55274	9.4657	9.15245	9.47781	9.33046	9.18564	9.8189	9.75355	9.82574
ENSMUSG00000013465	0.09809	0.0156048	0.0238173	0.377439	0.329185	0.672423	n	2			7.84169	7.84841	7.75356	8.03278	7.88187	7.90653	7.99744	7.96742	8.01465	8.00748	7.99123	8.00168
ENSMUSG00000014867	0.545858	0.970381	0.412743	0.404135	0.253862	0.381454	n	2			8.87904	9.03692	9.04661	8.98644	9.10822	9.00077	8.98242	9.02746	8.9598	8.94056	9.01329	8.70746
ENSMUSG00000014873	0.0506334	0.0266999	0.134306	0.438234	0.819243	0.73111	n	2			6.66191	6.79678	6.75206	6.46373	6.49564	6.64814	6.51795	6.5322	6.34107	6.33694	6.5041	6.68124
ENSMUSG00000015087	0.913933	0.30119	0.407492	0.4179	0.432626	0.620748	n	2			8.08231	7.73013	7.76007	7.97033	7.5658	7.97536	7.84841	7.61564	7.61117	8.02318	7.61786	6.80582
ENSMUSG00000015092	0.49325	0.620559	0.068393	0.725562	0.0363649	0.290307	n	2			10.0591	10.025	10.0411	9.95705	10.0513	10.0411	9.70036	10.206	9.96448	10.1521	10.108	10.2313
ENSMUSG00000015335	0.799076	0.816638	0.934355	0.976131	0.71229	0.75529	n	2			9.28981	9.10093	9.07517	9.29602	9.12421	9.11862	9.24349	9.29702	9.00857	9.25622	9.11794	9.06857
ENSMUSG00000015776	0.237301	0.151103	0.0923393	0.438715	0.752519	0.544812	n	2			7.65729	7.58947	7.64323	7.5902	7.61404	7.47837	7.39069	7.60353	7.49401	7.5119	7.60595	7.51147
ENSMUSG00000015790	0.00252746	0.00394612	0.0114127	0.30724	0.0760396	0.113878	n	2			7.53723	7.42924	7.43233	7.8115	7.84841	7.77343	7.84364	7.98199	7.8169	7.96417	8.08623	8.28034
ENSMUSG00000016252	0.4634	0.83596	0.11265	0.800222	0.0617054	0.132868	n	2			10.4406	10.4187	10.4838	10.3932	10.6085	10.5113	10.3044	10.6543	10.4565	10.0695	10.2186	10.3697
ENSMUSG00000016253	0.383604	0.30888	0.0768391	0.972012	0.116772	0.109033	n	2			7.38247	7.42721	7.36067	7.38773	7.37647	7.16656	7.23696	7.42422	7.27987	6.85317	7.09551	7.203
ENSMUSG00000016256	0.0238127	0.0087649	0.296418	0.135829	0.922639	0.419	n	2			5.64966	5.7745	5.80598	5.95543	6.06917	5.91422	6.02239	6.22967	6.11684	5.78635	5.82451	6.27502
ENSMUSG00000017764	0.445609	0.0485462	0.0164862	0.0999253	0.00920322	0.0102658	n	2			8.32438	8.36599	8.20754	8.25663	8.15121	8.31779	8.10777	8.12169	8.08485	8.68284	8.4933	8.59613
ENSMUSG00000017858	0.0408394	0.0223008	0.00126188	0.919672	0.109787	0.0831794	n	2			8.68652	8.74082	8.7316	8.44851	8.60497	8.45291	8.4295	8.57485	8.48049	8.36068	8.42538	8.32913
ENSMUSG00000017999	0.229623	0.25034	0.0995189	0.998465	0.178716	0.178331	n	2			7.2354	7.20973	7.0934	7.1914	7.26617	7.36609	7.16656	7.31166	7.34499	7.39761	7.39176	7.76854
ENSMUSG00000018209	0.000399865	0.00797059	0.355074	0.322132	0.471405	0.455459	n	2			7.66692	7.66534	7.64354	7.26473	7.31985	7.27848	7.26844	7.38247	7.3458	7.4153	7.4431	3.87157
ENSMUSG00000018322	0.480209	0.176249	0.00782078	0.177116	0.0471225	0.00268963	n	2			9.08967	9.03818	9.02584	9.12041	8.93421	8.93838	9.17889	9.06014	9.11994	8.84534	8.7676	8.71362
ENSMUSG00000019188	0.4003	0.733364	0.0269011	0.351216	0.0520067	0.0532079	n	2			7.90749	7.91556	7.8147	7.90653	7.97169	7.87947	7.84099	7.95008	7.7812	7.97351	8.04007	8.07176
ENSMUSG00000019715	0.622127	0.127498	0.427104	0.619715	0.456295	0.488869	n	2			7.20121	7.27678	7.26312	7.20121	6.93047	7.38121	7.09785	6.97246	7.19966	7.39725	7.11513	4.06453
ENSMUSG00000023330	0.10596	0.0474283	0.0401309	0.322406	0.216192	0.570897	n	2			7.69004	7.92814	7.97292	8.01009	8.17724	8.08268	8.04676	8.25254	8.26773	8.07129	8.32028	8.40486
ENSMUSG00000025816	0.672446	0.0954837	0.0578559	0.176714	0.0793846	0.277843	n	2			8.50527	8.69012	8.59474	8.53	8.72704	8.6398	8.66532	8.84692	8.76609	8.71833	8.95688	9.00605
ENSMUSG00000026650	0.678227	0.854572	0.610182	0.406904	0.828351	0.444831	n	2			12.8632	13.0137	13.0496	12.8914	12.9902	12.9567	12.9266	12.9902	13.0496	12.8229	12.9567	13.0137
ENSMUSG00000026723	0.774848	0.134192	0.0225213	0.112617	0.0195803	0.00482565	n	2			6.7394	6.77706	6.8686	6.67685	6.85906	6.78865	6.83401	7.19279	7.13358	5.94572	6.03868	6.35062
ENSMUSG00000026739	0.973556	0.206209	0.750637	0.187112	0.767467	0.145204	n	2			8.01253	8.40259	8.36599	8.02242	8.3867	8.35397	8.38542	8.41764	8.77636	7.94341	8.27562	8.37751
ENSMUSG00000026740	0.236176	0.420441	0.274414	0.479754	0.631914	0.398789	n	2			6.94767	6.76391	6.69035	6.80952	6.41629	6.58883	6.83795	6.61879	6.67275	6.91252	6.3024	6.20158
ENSMUSG00000026750	0.32503	0.142114	0.270677	0.520537	0.971665	0.503266	n	2			10.745	10.9706	10.9595	10.8578	11.088	11.0853	10.9379	11.1231	11.2001	10.894	11.0576	11.0907
ENSMUSG00000026753	0.315493	0.235915	0.105542	0.982818	0.481017	0.196326	n	2			8.88672	9.09053	9.04854	9.00857	9.23776	9.09369	9.05762	9.16244	9.11479	9.1332	9.2148	9.16755
ENSMUSG00000026754	0.821098	0.451244	0.000135347	0.428607	0.0181572	0.0181034	n	2			7.09396	7.07164	7.03647	7.13293	7.14346	6.97004	6.90723	7.13112	6.97867	7.46089	7.48443	7.44953
ENSMUSG00000026755	0.439217	0.00112464	0.277461	0.00203303	0.644327	0.00372421	y	2	higher		9.95938	9.94227	9.98091	9.91927	9.97806	9.92907	10.0919	10.1396	10.1211	9.95138	9.88327	9.94864
ENSMUSG00000026761	0.322898	0.220065	0.17686	0.71629	0.429924	0.61884	n	2			6.01806	6.12925	6.15005	6.04182	6.35884	6.26738	6.0817	6.31781	6.43218	6.13043	6.37785	6.60041
ENSMUSG00000026764	0.151377	0.00442988	0.019131	0.00960691	0.115602	0.0459815	y	2	lower		6.21309	5.98939	6.0265	5.93385	5.99664	5.72625	5.44076	5.16705	5.09173	5.629	5.71298	5.69108
ENSMUSG00000026766	0.18797	0.85445	0.331847	0.170228	0.0767539	0.257578	n	2			10.967	10.991	10.935	10.9254	10.9572	10.9015	10.9458	10.9748	10.9614	10.9595	10.9898	11.0355
ENSMUSG00000026767	0.267709	0.915253	0.940517	0.352201	0.449575	0.886213	n	2			7.77403	7.87997	7.88586	7.64556	7.8585	7.74973	7.7004	7.94039	7.92913	7.69412	7.83871	7.98463
ENSMUSG00000026768	0.364408	0.539821	0.685415	0.672548	0.427099	0.520976	n	2			4.3412	4.36971	4.67314	4.3412	4.06453	4.48045	4.30633	4.24067	4.55118	3.99561	4.80597	5.03946
ENSMUSG00000026771	0.0564797	0.0370326	0.623696	0.209366	0.388929	0.821628	n	2			7.24605	7.28129	7.22663	7.33929	7.40169	7.49304	7.32833	7.33408	7.32721	7.21618	7.20699	7.49401
ENSMUSG00000026779	0.0309546	0.403734	0.045477	0.0608834	0.218908	0.0634697	n	2			6.40623	6.54348	6.6577	6.74781	7.0335	7.02652	6.50003	6.66956	6.70983	6.89258	7.39418	7.49236
ENSMUSG00000026799	0.38913	0.692249	0.0554513	0.778283	0.15109	0.321027	n	2			7.89586	7.923	7.91135	7.7009	7.97033	7.80169	7.75274	8.06732	7.76982	7.95882	7.99059	8.04007
ENSMUSG00000026810	0.0472451	0.0222752	0.00410501	0.354625	0.259839	0.0241273	n	2			7.98032	8.02506	8.04949	7.74591	7.7566	7.49591	7.73372	7.8666	7.71536	7.54371	7.60923	7.4431
ENSMUSG00000026812	0.34142	0.136558	0.0289646	0.110268	0.0463793	0.104629	n	2			6.18009	5.89683	5.98505	5.96441	5.90762	5.87914	5.87789	5.84525	5.76462	5.59736	5.57676	5.78852
ENSMUSG00000026816	0.213165	0.476946	0.0912961	0.877411	0.480959	0.92584	n	2			6.73882	6.64814	6.55303	6.45876	6.6326	6.52037	6.39308	6.81751	6.31706	6.4826	6.46894	6.52681
ENSMUSG00000026825	0.312819	0.0487138	0.306349	0.102917	0.943231	0.109503	n	2			6.84323	6.50684	6.24228	6.44619	6.14592	6.29175	6.17566	5.76623	5.6003	6.48117	6.10998	6.26118
ENSMUSG00000026849	0.190365	0.186924	0.687238	0.782991	0.127333	0.140345	n	2			5.88277	6.07925	5.98411	5.97546	5.70044	5.79274	5.61149	5.7745	5.96676	6.02239	5.92608	6.0952
ENSMUSG00000026857	0.391641	0.0840703	0.101641	0.162957	0.144249	0.285259	n	2			8.55927	8.45056	8.39017	8.4531	8.36294	8.41663	8.22049	8.40585	8.2474	8.27911	8.173	7.81639
ENSMUSG00000026858	0.342966	0.334247	0.606534	0.964188	0.899045	0.916385	n	2			6.32323	6.25362	6.28831	6.46822	6.42938	6.23466	6.48702	6.42215	6.23797	6.6179	6.58407	6.01748
ENSMUSG00000026864	0.643408	0.0413756	0.729927	0.102114	0.45135	0.0304616	n	2			10.8002	11.0261	11.0192	10.859	11.1958	10.9768	11.1329	11.3033	11.4306	10.8234	10.9503	10.9731
ENSMUSG00000026867	0.866823	0.891917	0.186547	0.775405	0.149135	0.253025	n	2			8.31544	7.99744	8.01714	8.26773	7.96657	8.16864	8.33413	7.89773	8.02613	8.10497	7.7162	7.69067
ENSMUSG00000026880	0.010007	0.217721	0.396888	0.0104727	0.281878	0.37082	n	2			7.83409	7.87652	7.87002	8.14769	8.05882	8.17782	7.97169	7.88466	7.87997	7.93175	7.68598	5.75576
ENSMUSG00000026889	0.618255	0.21899	0.752536	0.168338	0.614736	0.716677	n	2			7.28178	7.31058	7.33856	7.15637	7.35198	7.31567	7.30376	7.52692	7.43963	7.08194	7.47245	7.52943
ENSMUSG00000026895	0.136328	0.0370713	0.671632	0.365123	0.302139	0.0974222	n	2			10.2931	10.3222	10.3309	10.4265	10.5667	10.3697	10.4708	10.6227	10.4999	10.2176	10.3885	10.4397
ENSMUSG00000026917	0.214927	0.147201	0.447578	0.571031	0.266607	0.328075	n	2			7.74779	7.72098	7.676	7.92056	7.69687	7.94733	7.87318	7.74626	7.77687	7.81919	7.62855	7.0099
ENSMUSG00000026921	0.970401	0.089236	0.202364	0.179318	0.255009	0.0364871	n	2			6.46373	6.24228	6.40014	6.56845	6.34371	6.17826	6.23138	6.19407	5.97155	6.77287	6.39191	6.55496
ENSMUSG00000026924	0.596841	0.975734	0.0697553	0.564023	0.0480093	0.072481	n	2			8.94426	8.83074	8.783	8.86985	8.86394	8.69568	8.82184	8.93838	8.80398	9.00313	9.07887	9.29702
ENSMUSG00000026926	0.156634	0.480726	0.516203	0.335427	0.457308	0.973158	n	2			8.563	8.63015	8.66401	8.54479	8.58648	8.53737	8.61549	8.53943	8.61187	8.5233	8.60601	8.63303
ENSMUSG00000026932	0.932836	0.740508	0.335327	0.815197	0.678058	0.176542	n	2			5.91229	5.988	6.07039	6.00491	5.80109	6.19904	5.94682	5.93385	6.03097	6.11441	6.08777	5.97435
ENSMUSG00000026960	0.628786	0.611014	0.66023	0.998774	0.954569	0.952481	n	2			8.58119	8.98703	9.17559	8.7452	9.27156	9.09413	8.84815	8.96785	9.29388	8.73066	9.12326	9.2179
ENSMUSG00000026966	0.160918	0.420481	0.291244	0.981265	0.0714974	0.218556	n	2			9.8189	9.82246	9.74586	9.94296	10.0316	9.81216	9.9181	10.1753	9.70486	9.56041	9.72122	9.80317
ENSMUSG00000026970	0.0927457	0.0446205	0.0429725	0.107966	0.0141082	0.00471057	n	2			10.658	10.6117	10.6621	10.6241	10.5415	10.5544	10.5441	10.4246	10.3854	10.7385	10.8877	10.8465
ENSMUSG00000026977	0.41549	0.267598	0.249809	0.574154	0.506105	0.963224	n	2			9.57787	9.39596	9.25535	9.21177	9.36111	9.35831	9.3283	9.14851	9.31478	9.18189	9.25107	9.34755
ENSMUSG00000027006	0.229289	0.148801	0.138019	0.726813	0.390074	0.540498	n	2			8.79203	8.87436	8.85052	8.94165	9.07007	8.84027	8.85931	9.08789	9.01107	8.87487	9.12896	9.19449
ENSMUSG00000027012	0.586916	0.296132	0.319185	0.609712	0.563724	0.849224	n	2			9.66335	9.88663	9.93157	9.7598	10.0499	9.88095	9.82246	10.0012	10.0476	9.76912	10.0672	10.1137
ENSMUSG00000027018	0.380652	0.00979343	0.0111485	0.064926	0.0643085	0.804936	n	2			8.75042	8.79437	8.70414	8.72409	8.80692	8.86173	8.91434	8.94817	8.94661	8.89776	8.89835	8.98703
ENSMUSG00000027067	0.543951	0.783848	0.563036	0.731136	0.243852	0.393553	n	2			9.30509	9.1592	9.14478	9.24592	9.14851	9.07196	9.28133	9.11341	9.15081	9.28565	9.16355	9.28365
ENSMUSG00000027076	0.833206	0.907533	0.840544	0.939607	0.621994	0.742371	n	2			8.62171	8.3871	8.30292	8.5213	8.4131	8.29913	8.49008	8.54	8.23154	8.46218	8.3369	8.5904
ENSMUSG00000027079	0.722633	0.0331867	0.0638233	0.0841266	0.06821	0.028263	n	2			9.10605	9.17157	9.15359	9.10093	9.22679	9.15189	9.04088	9.09413	9.03053	9.23317	9.4309	9.35744
ENSMUSG00000027080	0.360196	0.132439	0.0745467	0.423144	0.449445	0.790328	n	2			7.59393	7.90585	7.92913	7.77061	7.95682	8.26569	7.93564	8.14645	8.4933	7.98597	8.20487	8.22708
ENSMUSG00000027091	0.0112152	0.306675	0.0285543	0.0578724	0.0537399	0.0266823	n	2			9.73343	9.76801	9.74122	9.64149	9.67125	9.61027	9.7468	9.6737	9.73076	9.46964	9.46432	9.28037
ENSMUSG00000027099	0.900735	0.18477	0.964877	0.125796	0.883362	0.277355	n	2			9.17253	9.52037	9.48063	9.2076	9.49257	9.41769	9.43818	9.67125	9.78536	9.16244	9.36247	9.67478
ENSMUSG00000027102	0.133595	0.22604	0.00410016	0.688209	0.0631891	0.0385321	n	2			9.2465	9.33119	9.3993	9.04742	9.06857	9.30059	9.08361	9.13521	9.34532	8.8255	8.81105	8.989
ENSMUSG00000027104	0.147667	0.52668	0.0464346	0.271565	0.33009	0.0754196	n	2			8.43363	8.64889	8.60678	8.17724	8.50389	8.36973	8.37751	8.5253	8.59536	7.99818	8.2706	8.32253
ENSMUSG00000027115	0.665138	0.931098	0.481884	0.659046	0.313151	0.58709	n	2			7.75596	8.12364	8.20149	7.82882	8.30153	8.23291	7.6229	8.15659	8.23589	7.48313	8.0183	8.04416
ENSMUSG00000027122	0.455132	0.657599	0.781322	0.406489	0.495819	0.905808	n	2			7.12461	7.10972	7.07783	6.96559	7.10931	7.1056	6.9978	7.2055	7.22097	7.00025	7.12211	7.26242
ENSMUSG00000027131	0.00904715	0.0421712	0.00438595	0.248113	0.0295718	0.450921	n	2			10.0188	10.0218	9.94784	10.1255	10.2252	10.1906	10.2393	10.4385	10.2082	10.2986	10.3551	10.4483
ENSMUSG00000027132	0.0872851	0.937075	0.551962	0.247913	0.314968	0.724282	n	2			5.59736	5.6795	5.52664	5.22728	5.52298	5.28773	5.29681	5.69312	5.77317	5.28389	5.629	5.63634
ENSMUSG00000027133	0.0217449	0.0444386	0.0780674	0.391569	0.703565	0.702329	n	2			10.7823	10.8555	10.8617	11.0192	11.2132	11.1494	11.0593	11.3896	11.264	10.9898	11.1819	11.3629
ENSMUSG00000027160	0.0784684	0.0638352	0.0691067	0.793791	0.362385	0.407902	n	2			7.81741	7.97134	8.16652	7.51822	7.80011	7.70444	7.6275	7.59108	7.72516	7.2018	7.4663	7.76592
ENSMUSG00000027162	0.227897	0.258722	0.0374337	0.87118	0.11875	0.181152	n	2			8.36719	8.70523	8.56601	8.53652	8.89166	8.84615	8.4933	8.99399	8.88539	8.86103	9.17082	9.37633
ENSMUSG00000027166	0.0101161	0.0160911	0.0991014	0.991555	0.279426	0.278193	n	2			6.08012	6.14463	6.05061	5.6274	5.71741	5.82026	5.6077	5.8261	5.73412	5.19592	5.00017	5.84706
ENSMUSG00000027167	0.609757	0.39876	0.114483	0.646142	0.304108	0.688215	n	2			6.96506	6.92354	7.06383	6.82373	7.06702	6.9231	6.72402	7.06057	6.84791	6.71863	6.82541	6.93556
ENSMUSG00000027176	0.234947	0.0944112	0.106901	0.99751	0.66673	0.593991	n	2			8.73333	8.88967	8.91373	8.86253	9.23086	8.98567	8.90947	9.11177	9.05907	8.90346	9.2171	9.16062
ENSMUSG00000027187	0.144465	0.842914	0.154392	0.0951472	0.281862	0.1701	n	2			6.37182	6.88875	6.83211	6.13785	6.56019	6.25551	6.58651	6.59979	6.79074	4.51732	5.79934	6.31342
ENSMUSG00000027194	0.837939	0.107235	0.302349	0.136816	0.273314	0.76377	n	2			5.80109	5.69446	5.67489	5.77792	5.75576	5.5897	5.78852	5.93962	5.82026	5.75576	5.78394	6.14152
ENSMUSG00000027195	0.408008	0.358638	0.331018	0.604102	0.200006	0.150626	n	2			6.97773	7.48496	7.35463	7.39941	7.29187	7.64478	7.87595	7.04639	7.96281	7.4798	6.67779	6.43005
ENSMUSG00000027222	0.273297	0.042177	0.0108432	0.151318	0.187422	0.625782	n	2			9.04491	8.86013	8.91652	8.9251	8.84212	8.56927	8.65514	8.57063	8.28211	8.61741	8.64586	8.45222
ENSMUSG00000027243	0.22507	0.102254	0.109297	0.394876	0.0262261	0.019303	n	2			6.4097	6.44876	6.2934	6.38079	6.23943	6.2526	6.10405	6.23355	6.31514	6.6064	6.43287	6.53634
ENSMUSG00000027244	0.0620421	0.0130487	0.113742	0.231722	0.341503	0.628688	n	2			7.59749	7.58365	7.60501	7.30448	7.28357	7.48245	7.19966	7.20973	7.33162	7.35154	7.27934	6.82861
ENSMUSG00000027245	0.393334	0.553799	0.749134	0.226503	0.3869	0.940113	n	2			9.77324	9.98091	9.98562	9.66525	9.99573	9.71692	9.84077	10.141	9.97486	9.69609	10.0074	10.2109
ENSMUSG00000027248	0.08572	0.0933747	0.763782	0.304044	0.246567	0.103317	n	2			10.8827	10.8791	10.8644	10.9503	10.9555	11.0622	11.1286	10.9503	11.1819	11.0051	10.8154	10.8644
ENSMUSG00000027259	0.148639	0.323973	0.0212317	0.882981	0.102819	0.340317	n	2			5.9231	6.01748	6.10317	6.05629	6.14463	6.22756	5.96801	6.35884	6.16125	6.2172	6.28434	6.41811
ENSMUSG00000027263	0.0865075	0.0287796	0.314857	0.0878046	0.785196	0.287435	n	2			7.49091	7.61884	7.62172	7.38961	7.51249	7.4459	7.08194	7.36099	7.21797	7.18109	7.42858	7.61786
ENSMUSG00000027272	0.278849	0.11164	0.479799	0.998682	0.158809	0.0655574	n	2			6.26165	6.39191	6.18161	5.8701	6.22141	6.22141	5.98505	6.17476	6.1524	6.28095	6.27567	6.51001
ENSMUSG00000027288	0.00280881	0.0012832	0.00350358	0.487921	0.0249411	0.0389767	n	2			7.16125	7.11385	7.05817	7.36609	7.37618	7.46913	7.40108	7.42109	7.48443	7.718	7.75193	7.5608
ENSMUSG00000027291	0.585767	0.531174	0.283511	0.849005	0.378632	0.335823	n	2			6.54348	6.51438	6.44792	6.69872	6.38504	6.60479	6.63743	6.5007	6.48526	7.12743	6.82737	6.42938
ENSMUSG00000027296	0.00189843	0.111217	0.0324214	0.0231724	0.168489	0.0464229	y	2	intermediate		7.08318	7.1672	7.01158	6.54428	6.62224	6.70144	6.80116	7.02078	6.94417	6.00591	6.25955	6.57858
ENSMUSG00000027298	0.373305	0.0822516	0.462186	0.401823	0.32799	0.242919	n	2			7.4672	7.22279	7.21128	7.60162	7.23485	7.47724	7.66918	7.41261	7.60923	7.44254	7.21477	6.24527
ENSMUSG00000027305	0.0743807	0.0381736	0.00352029	0.170962	0.014392	0.465029	n	2			7.6229	7.83956	7.75193	7.85363	8.04751	7.92489	7.96704	8.33616	8.16977	8.16149	8.28086	8.3279
ENSMUSG00000027306	0.675542	0.320446	0.0346102	0.567171	0.137107	0.334021	n	2			9.34051	9.58283	9.55226	9.3283	9.66335	9.66991	9.41844	9.76093	9.78867	9.68275	9.89613	9.85415
ENSMUSG00000027315	0.0777827	0.114816	0.0615276	0.0196998	0.673317	0.0279481	y	2	lower		5.988	5.80337	5.78394	6.21206	5.94864	6.22093	5.77207	5.59874	5.3989	6.17082	5.98354	6.08274
ENSMUSG00000027326	0.695395	0.543922	0.821585	0.68441	0.977701	0.7902	n	2			6.36289	5.80902	5.98939	6.12925	5.75716	6.02347	6.17358	5.2598	6.05629	6.6524	5.67155	5.55197
ENSMUSG00000027331	0.243126	0.00320715	0.048921	0.00080077	0.00962768	0.00759497	y	2	lower		9.90831	9.9691	10.0243	9.97073	10.0566	10.0555	9.65029	9.70719	9.64149	9.8008	9.89395	9.8392
ENSMUSG00000027333	0.19479	0.554002	0.017174	0.391951	0.169453	0.0380875	n	2			7.03418	6.7573	6.82431	6.76522	6.44792	6.76643	6.97004	6.72455	6.68478	6.55763	6.41811	6.35613
ENSMUSG00000027346	0.418061	0.310936	0.473149	0.569137	0.853953	0.49673	n	2			7.53285	7.72208	7.718	7.61205	7.77403	7.83268	7.57908	7.92634	7.98719	7.65607	7.68369	7.82882
ENSMUSG00000027349	0.407394	0.00633134	0.0307485	0.725895	0.588301	0.57108	n	2			8.9912	8.99986	8.95688	9.04416	9.21177	8.93964	9.08836	9.10647	9.09669	9.09369	9.08159	9.17685
ENSMUSG00000027351	0.000706554	0.0243434	0.00202181	0.373162	0.0193296	0.0722555	n	2			5.09173	5.04235	4.94975	5.72882	5.66603	5.65721	5.91766	5.56932	6.07474	6.34438	6.12744	6.46268
ENSMUSG00000027353	0.00798698	0.000594709	0.00485275	0.253762	0.0173411	0.0220836	n	2			6.68348	6.61397	6.54647	7.23801	7.55124	7.53986	7.32081	7.24817	7.27609	7.87902	8.20754	8.3369
ENSMUSG00000027360	0.000156307	0.0389052	0.00424284	0.754276	0.141507	0.229861	n	2			7.1365	7.15457	7.20499	6.66858	6.64946	6.69035	6.5187	6.85818	6.73882	6.42938	6.62937	6.54647
ENSMUSG00000027361	0.00534706	0.000213395	0.0494964	0.00835931	0.874907	0.0820178	y	2	lower		7.18176	7.21348	7.27413	6.90773	6.89848	7.01757	6.65091	6.75286	6.68348	6.84112	6.85682	7.08128
ENSMUSG00000027363	0.532887	0.778049	0.669573	0.876587	0.46211	0.70781	n	2			10.875	10.8827	10.844	10.7702	10.7306	10.9493	10.7046	10.7814	11.0227	10.9031	10.8386	10.8926
ENSMUSG00000027366	0.376842	0.135002	0.127553	0.216666	0.486771	0.353915	n	2			8.78805	8.71044	8.84751	8.66709	8.83471	8.58918	8.72187	8.37385	8.24212	8.51519	8.74834	8.59897
ENSMUSG00000027371	0.000707854	0.0302138	0.00925143	0.217554	0.0614233	0.0886766	n	2			7.51822	7.46318	7.46318	7.06321	7.07545	6.97867	6.65014	7.05888	6.77217	7.09396	7.22555	7.21348
ENSMUSG00000027406	0.0238466	0.136927	0.134814	0.50034	0.79736	0.757427	n	2			9.64027	9.71186	9.7598	9.40583	9.5713	9.4458	9.41219	9.66198	9.54586	9.32986	9.6136	9.56377
ENSMUSG00000027408	0.163315	0.0545282	0.00178656	0.03668	0.000949338	0.00736795	y	2	lower		8.54921	8.3768	8.4958	8.59836	8.61979	8.52219	8.32687	8.01714	8.03616	8.92608	9.02584	9.03692
ENSMUSG00000027411	0.937257	0.160597	0.886307	0.213993	0.860428	0.40867	n	2			7.64247	7.5223	7.62453	7.67382	7.50664	7.62453	7.60923	7.73113	7.77569	7.49348	7.41794	7.8169
ENSMUSG00000027425	0.0848246	0.332076	0.633565	0.0240078	0.790747	0.421779	n	2			6.41811	6.48526	6.37118	6.58044	6.4912	6.50228	6.36289	6.43379	6.32688	6.4097	6.34438	6.71461
ENSMUSG00000027429	0.0144926	0.011616	0.00483312	0.137189	0.00401616	0.0112966	n	2			8.4561	8.43206	8.42701	8.76248	8.81038	8.66849	8.95078	8.77636	8.88314	9.13744	9.19139	9.33528
ENSMUSG00000027430	0.0161556	0.355477	0.047659	0.199569	0.900662	0.203296	n	2			7.9962	8.07176	8.00168	8.31419	8.23992	8.17239	8.13099	8.22049	7.97536	8.17113	8.21495	8.36973
ENSMUSG00000027433	0.100346	0.0842649	0.108114	0.815834	0.830026	0.663243	n	2			8.7452	8.78881	8.84446	8.62897	8.60151	8.75992	8.68652	8.60814	8.74253	8.59613	8.58174	8.76063
ENSMUSG00000027439	0.269155	0.0777052	0.283688	0.692054	0.748703	0.940273	n	2			7.56947	7.77569	7.77195	7.4153	7.74626	7.47204	7.42979	7.608	7.4431	7.17861	7.56316	7.69805
ENSMUSG00000027454	3.29529e-05	0.0241278	0.00266474	0.363883	0.204796	0.13586	n	2			7.16776	7.26242	7.19189	8.00961	8.09995	8.01714	7.67792	8.09367	7.93175	8.08397	8.12575	8.33096
ENSMUSG00000027465	0.601506	0.840386	0.696192	0.752942	0.961901	0.825694	n	2			8.99652	8.6768	8.61363	9.06213	8.61138	8.91608	9.06138	8.68919	8.65033	9.19947	8.7161	8.64036
ENSMUSG00000027466	0.99446	0.2346	0.207933	0.247197	0.219921	0.885989	n	2			7.8566	7.40074	7.49541	7.82591	7.32985	7.59256	7.50767	7.23696	7.30376	7.47522	7.20121	7.31985
ENSMUSG00000027469	0.347997	0.167623	0.0431931	0.272535	0.0569635	0.652954	n	2			8.44584	8.44097	8.42006	8.45222	8.60814	8.44228	8.45919	8.82095	8.70414	8.60744	8.73546	8.82487
ENSMUSG00000027487	0.0752661	0.150143	0.0191433	0.382208	0.0374345	0.0802409	n	2			7.0071	7.12069	7.02652	7.12266	7.20448	7.14591	7.08764	7.43031	7.28688	7.40417	7.64203	7.71479
ENSMUSG00000027495	0.730886	0.832228	0.145175	0.458079	0.142535	0.0350219	n	2			6.53158	6.82675	6.94883	6.5382	6.7489	6.8486	6.84619	6.69872	6.85602	6.49443	6.6246	6.36102
ENSMUSG00000027496	0.310998	0.592677	0.68744	0.280348	0.0835829	0.73262	n	2			10.7851	10.6974	10.6309	10.6359	10.6928	10.5965	10.6271	10.9059	10.745	10.7594	10.7415	10.6799
ENSMUSG00000027502	0.0126577	0.0131185	0.00248123	0.0910063	0.0733874	0.0318594	n	2			8.71278	8.72907	8.68702	8.43855	8.54972	8.49233	8.44097	8.3687	8.27981	8.57235	8.60192	8.61078
ENSMUSG00000027519	0.130391	0.484278	0.07522	0.385143	0.613806	0.220725	n	2			8.85158	8.59191	8.5882	9.06941	8.82008	8.8255	8.93781	8.80243	8.59686	8.99772	8.809	9.10352
ENSMUSG00000027522	0.325056	0.147893	0.252026	0.021105	0.0766863	0.891984	n	2			7.58009	7.87002	7.88925	7.72251	7.69753	7.50309	7.88322	8.12607	8.00417	7.75478	8.11666	8.08268
ENSMUSG00000027540	0.251615	0.185658	0.230439	0.58807	0.938107	0.597035	n	2			9.4142	9.15568	9.15999	9.4458	9.41769	9.28133	9.49946	9.57369	9.26389	9.43585	9.3843	9.33929
ENSMUSG00000027546	0.300448	0.499353	0.955104	0.81422	0.556665	0.677849	n	2			8.83545	8.37451	8.42259	8.99986	8.63303	8.67113	9.02321	8.70669	8.41366	9.00534	8.64713	8.03837
ENSMUSG00000027573	0.00849031	0.0552968	0.00611248	0.743315	0.626575	0.525779	n	2			9.07774	9.10647	9.1125	8.86013	8.94056	8.85764	8.8255	8.99732	8.89652	8.83005	8.85052	8.91777
ENSMUSG00000027575	0.00724128	0.0367431	0.0132093	0.522266	0.100828	0.257731	n	2			7.54806	7.34968	7.34022	7.002	6.85102	7.02262	7.1101	6.79678	6.64201	6.80582	6.34107	6.63691
ENSMUSG00000027582	0.00839783	0.17841	0.575006	0.694609	0.590301	0.750625	n	2			7.68738	7.66332	7.63706	7.49717	7.40552	7.48313	7.6616	7.41794	7.4198	7.8566	7.484	7.34022
ENSMUSG00000027584	0.0173888	0.00120971	0.176612	0.00203779	0.011843	0.00270021	y	2	lower		5.56465	5.64726	5.78505	5.2517	5.33618	5.35302	4.97436	4.91922	4.83037	5.5132	5.54327	5.54965
ENSMUSG00000027589	0.088935	0.739348	0.277041	0.111063	0.789245	0.239799	n	2			6.66858	6.81021	6.82861	6.24378	6.64316	6.44272	6.54742	6.89659	7.03478	6.16462	6.57413	6.77621
ENSMUSG00000027602	0.667832	0.739745	0.67715	0.979403	0.602074	0.609551	n	2			11.7119	11.5374	11.4251	11.7576	11.5213	11.5506	11.8154	11.5293	11.4741	11.8922	11.615	10.5866
ENSMUSG00000027603	0.0801662	0.0210364	0.99111	0.892209	0.0833418	0.00965193	n	2			7.21797	7.08128	7.05068	7.03586	6.76643	6.84263	6.93896	6.80173	6.86461	7.17549	7.11566	7.05657
ENSMUSG00000027605	0.437911	0.882525	0.464999	0.437958	0.280214	0.536496	n	2			8.11793	8.20358	8.26647	8.0868	8.23908	8.09126	8.08986	8.23412	8.29995	8.09196	8.34318	8.43748
ENSMUSG00000027618	0.87789	0.164801	0.15578	0.284121	0.25775	0.903469	n	2			8.55179	8.58229	8.5896	8.60548	8.61012	8.48646	8.65235	8.65705	8.5761	8.58028	8.64638	8.67362
ENSMUSG00000027628	0.0126951	0.120996	0.40163	0.670901	0.034481	0.0622631	n	2			7.30825	7.355	7.35704	7.11333	7.21618	7.15457	7.00447	7.28915	7.0576	7.29703	7.49638	7.41067
ENSMUSG00000027635	0.949089	0.454294	0.603642	0.422804	0.588903	0.740684	n	2			8.58295	8.8255	8.85764	8.63225	8.85158	8.80464	8.71698	8.90029	8.9196	8.7316	8.92661	8.78615
ENSMUSG00000027641	0.818021	0.783022	0.723287	0.863454	0.79148	0.928091	n	2			7.76326	7.92162	7.96417	7.8566	7.95882	7.88515	7.68287	7.99691	8.09462	7.68598	7.97687	8.16542
ENSMUSG00000027642	0.0166735	0.00421967	0.767984	0.180689	0.0404733	0.0254265	n	2			10.5286	10.5943	10.5917	10.6758	10.6758	10.7476	10.7362	10.7306	10.7737	10.5902	10.5993	10.4838
ENSMUSG00000027650	0.329205	0.62707	0.154671	0.557417	0.35242	0.243639	n	2			7.86817	7.62545	7.7566	7.86421	7.84621	7.80839	7.77833	7.90798	7.70826	7.7949	7.94142	8.02318
ENSMUSG00000027651	0.0861574	0.0487067	0.183713	0.616385	0.0673756	0.0559899	n	2			6.14364	6.11684	6.14152	6.09907	6.03449	5.99439	6.01009	6.07405	5.97546	6.3463	6.13324	6.35884
ENSMUSG00000027652	0.875292	0.72887	0.460585	0.703564	0.44196	0.592317	n	2			7.39069	7.36303	7.37797	7.28688	7.53285	7.26617	7.25161	7.54806	7.43547	7.22222	7.58669	7.74058
ENSMUSG00000027654	0.00166835	0.000914139	0.106961	0.392595	0.917241	0.900367	n	2			6.51001	6.57086	6.51962	6.73093	6.76862	6.74591	6.79738	6.77981	6.7334	6.86067	6.59398	6.82017
ENSMUSG00000027655	0.241489	0.400806	0.245936	0.546027	0.637561	0.810128	n	2			6.00591	6.13043	5.90873	5.92246	5.96441	5.62578	5.77792	6.00222	5.99073	5.79274	5.93708	5.97056
ENSMUSG00000027678	0.853919	0.0316373	0.0728272	0.0366123	0.065019	0.350018	y	2	intermediate		6.66116	6.58651	6.36289	6.75988	6.44067	6.48887	6.12672	6.21504	6.07823	6.03975	5.47528	6.14852
ENSMUSG00000032046	0.112835	0.19366	0.923433	0.714095	0.398829	0.468052	n	2			8.91162	8.60497	8.71044	9.07517	8.96626	8.86893	9.07007	8.92885	8.79307	9.07347	8.80979	8.26275
ENSMUSG00000032698	0.458958	0.00227264	0.19831	0.0730198	0.320676	0.724154	n	2			6.79505	6.72511	6.78922	6.80722	6.72947	6.96058	6.98482	7.06949	7.07545	6.95804	6.80722	7.21677
ENSMUSG00000032802	0.00643441	0.0210478	0.4498	0.0511501	0.00376043	0.0118369	n	2			7.92877	7.8907	7.86421	7.58203	7.47079	7.42533	7.14169	7.00084	6.64718	7.91239	7.87284	8.05746
ENSMUSG00000032966	0.166492	0.0236651	0.552381	0.0169606	0.877298	0.202161	y	2	higher		11.476	11.5985	11.6114	11.6031	11.6948	11.6564	11.8013	11.8154	11.8323	11.7119	11.7504	11.4398
ENSMUSG00000033411	0.528291	0.589973	0.0830763	0.74413	0.568903	0.139481	n	2			7.86364	8.04829	7.94733	8.03516	8.21734	7.8566	8.03914	8.04676	7.89935	8.05165	8.09505	8.17896
ENSMUSG00000033526	0.121801	0.00189206	9.90441e-05	0.204149	0.00147327	0.00039311	n	2			6.63691	6.60787	6.56274	6.64438	6.82092	6.71533	6.79	6.85906	6.81021	7.26071	7.36162	7.34168
ENSMUSG00000033808	0.341603	0.105101	0.0329101	0.271437	0.0506354	0.245808	n	2			7.44737	7.56665	7.53285	7.56203	7.83116	7.51822	7.60014	7.91762	7.98537	7.83168	8.14156	8.20428
ENSMUSG00000034032	0.31977	0.0192457	0.995052	0.257618	0.44677	0.11977	n	2			7.48025	7.37863	7.37689	7.42979	7.17687	7.33534	7.27756	7.12983	7.1826	7.55124	7.24817	7.43442
ENSMUSG00000034154	0.0961657	0.492559	0.611407	0.194058	0.442847	0.557925	n	2			6.83133	6.73744	6.88437	6.90869	6.9334	7.09505	6.87591	6.93195	6.78337	6.95536	7.04712	5.63029
ENSMUSG00000034723	0.545119	0.215337	0.00855714	0.657771	0.04166	0.0308932	n	2			7.95882	8.09196	8.10271	7.86058	8.11079	8.00876	7.87829	7.92745	8.04676	7.62906	7.80559	7.718
ENSMUSG00000034850	0.47625	0.0342045	0.151378	0.299091	0.627964	0.401021	n	2			7.42109	7.26666	7.24785	7.15539	7.0992	7.41261	7.01707	7.14771	7.10054	7.29005	7.09259	7.09991
ENSMUSG00000034906	0.0877021	0.0250048	0.000261241	0.142301	0.000925524	0.00908492	n	2			7.4989	7.54324	7.43617	7.53723	7.6581	7.59955	7.68017	7.80011	7.64323	8.06638	7.96704	8.00617
ENSMUSG00000035093	0.137487	0.220959	0.131196	0.414969	0.421566	0.720607	n	2			6.30146	6.24527	6.21309	6.43005	6.31606	6.29793	6.47485	6.25955	6.72055	6.32323	6.38593	6.56724
ENSMUSG00000035236	0.0531833	0.0545486	0.00361993	0.560481	0.00666591	0.034424	n	2			6.09615	6.13785	6.25759	6.26968	6.33453	6.4199	6.26968	6.41058	6.49641	6.6743	6.69872	6.73744
ENSMUSG00000035268	0.581228	0.187706	0.486577	0.369704	0.743682	0.682407	n	2			10.0919	10.2636	10.3211	10.1563	10.4601	10.2636	10.2263	10.5801	10.496	10.0626	10.4896	10.51
ENSMUSG00000035437	0.0486431	0.320854	0.0367802	0.635647	0.110936	0.0851011	n	2			7.62906	7.61117	7.54324	7.43126	7.52545	7.50192	7.42212	7.51822	7.61831	7.37189	7.4035	7.19852
ENSMUSG00000035666	0.149681	0.0322724	0.75708	0.117076	0.685219	0.228219	n	2			6.51251	6.37972	6.33622	6.22856	6.26738	6.36799	5.97435	6.15616	6.20868	6.47798	6.07039	6.52179
ENSMUSG00000035772	0.0639086	0.015931	0.0498947	0.284719	0.681285	0.0148106	n	2			6.97164	6.96661	6.76472	6.67868	6.43287	6.71651	6.47398	6.44143	6.5292	6.71461	6.60999	6.63426
ENSMUSG00000035829	0.0117374	0.436474	0.175133	0.200196	0.232109	0.695016	n	2			7.72444	7.6844	7.80631	7.90255	8.03734	7.97687	7.91617	7.88925	7.6556	7.74243	7.8986	7.95213
ENSMUSG00000036160	0.0207884	0.00271962	0.00233836	0.0591748	0.0336268	0.0551833	n	2			5.7099	5.73623	5.49799	6.14775	6.14957	6.11242	6.31606	6.24791	6.42751	6.57858	6.64316	6.94298
ENSMUSG00000036202	0.134469	0.539573	0.357726	0.736205	0.27083	0.297233	n	2			8.57539	8.3867	8.44097	8.65196	8.7718	8.51361	8.75042	8.27735	8.72034	8.45778	8.26503	6.68735
ENSMUSG00000036249	0.0525532	0.035773	0.0453047	0.0127947	0.0106338	0.16282	y	2	intermediate		7.26242	7.21237	7.35072	7.13568	6.94883	7.11865	7.45218	7.47724	7.38247	7.47579	7.62363	7.7984
ENSMUSG00000036327	0.298944	0.143576	0.00793684	0.430819	0.0134981	0.0120167	n	2			8.26702	8.38598	8.28414	8.30614	8.25254	8.21102	8.25	8.13502	8.25663	7.61084	7.644	7.8677
ENSMUSG00000036352	0.118614	0.254046	0.031537	0.586476	0.932747	0.540259	n	2			10.2027	10.1234	10.1292	10.0281	10.1125	9.93157	9.98091	10.1642	10.0591	10.0378	10.0132	10.0361
ENSMUSG00000036504	0.255643	0.517236	0.503911	0.612591	0.56681	0.983589	n	2			10.8555	10.5813	10.5667	10.9614	10.8013	10.7163	10.8716	10.8364	10.5768	10.8519	10.8267	10.598
ENSMUSG00000036646	0.691049	0.832125	0.546102	0.285395	0.211358	0.4995	n	2			8.42701	8.18897	7.98398	8.39303	8.20827	8.18762	8.1849	8.14383	8.1785	8.23589	8.12169	7.93105
ENSMUSG00000036792	0.176307	0.00388959	0.0804863	0.0010155	0.164047	0.0155436	y	2	lower		6.33128	6.2712	6.43005	6.36637	6.47855	6.48702	5.89683	5.99073	6.02783	6.46894	6.70204	6.8486
ENSMUSG00000037110	0.0194569	0.36937	0.448246	0.0315077	0.172886	0.368619	n	2			6.99023	6.97987	6.95213	6.78635	6.87713	6.83211	6.96723	6.89988	6.97246	7.10824	6.86535	7.30825
ENSMUSG00000037514	0.430896	0.552484	0.360034	0.773117	0.184884	0.225592	n	2			9.13521	9.17685	9.09369	9.07569	9.16355	9.06014	9.1394	9.13678	9.06138	9.10605	9.25871	9.20438
ENSMUSG00000037773	0.0219626	0.00608876	0.0584551	0.225937	0.334556	0.728984	n	2			7.2612	7.12703	7.10111	7.00278	6.83266	6.85144	6.69872	6.80342	6.86976	6.9034	6.5007	6.81532
ENSMUSG00000037820	0.435702	0.00686518	0.0300416	0.230385	0.194004	0.764268	n	2			6.5883	6.47622	6.47972	6.82967	6.62125	6.43088	6.8332	6.84173	6.7931	6.7931	6.7554	6.9978
ENSMUSG00000037885	0.311929	0.126429	0.0522676	0.290044	0.00517462	0.0217313	n	2			7.11749	6.88037	6.7593	6.80116	6.65978	6.86067	6.79859	6.31241	6.6064	7.34828	7.35856	7.14821
ENSMUSG00000037938	0.0194041	0.536301	0.0198389	0.257597	0.703947	0.199709	n	2			7.04497	7.07213	7.14073	7.23696	7.3725	7.26312	7.14963	7.30765	7.00084	7.40933	7.27196	7.26774
ENSMUSG00000038312	0.313145	0.271854	0.363265	0.986528	0.498474	0.49531	n	2			7.53914	7.38178	7.40306	7.45695	7.31848	7.31245	7.41721	7.30132	7.3725	7.47657	7.32027	6.72455
ENSMUSG00000038369	0.498045	0.551995	0.135963	0.978328	0.379632	0.394721	n	2			9.07291	9.29549	9.27025	9.23238	9.17889	9.50617	9.2359	9.14478	9.52351	9.40113	9.30059	9.63583
ENSMUSG00000038383	0.220182	0.992645	0.670638	0.257867	0.361497	0.707718	n	2			7.09991	7.20931	7.27934	7.29584	7.46374	7.22164	7.12331	7.33471	7.12797	7.11679	7.29703	7.28178
ENSMUSG00000038533	0.0269751	0.0195526	0.0689916	0.146043	0.649429	0.31964	n	2			6.613	6.49297	6.48526	6.76057	6.70097	6.72547	6.74118	6.78337	6.78471	6.60251	6.7853	6.71274
ENSMUSG00000038671	0.994256	0.136282	0.0187072	0.158683	0.0302677	0.288363	n	2			8.31908	8.27444	8.24587	8.3682	8.33185	8.13756	8.16714	8.17896	7.93443	8.00168	8.04949	7.86895
ENSMUSG00000038685	0.517894	0.871385	0.0065807	0.806032	0.0215201	0.0863574	n	2			7.1952	7.31118	7.35663	7.32878	7.45021	7.24658	7.11611	7.49236	7.31782	7.54079	7.65136	7.67947
ENSMUSG00000038696	0.000907492	0.00457223	0.0109599	0.132646	0.0225379	0.0207503	n	2			8.22393	8.2601	8.23849	8.09161	8.08008	8.07315	7.98032	8.05494	8.04321	7.57908	7.59955	7.78665
ENSMUSG00000038831	0.10623	0.0178112	0.0104284	0.181046	0.713556	0.18477	n	2			8.01956	7.87284	7.88266	7.76049	7.7891	7.49091	7.57581	7.53986	7.30132	7.63323	7.57209	7.70913
ENSMUSG00000038844	0.0220674	0.0144266	0.0159292	0.179223	0.653126	0.29892	n	2			7.71853	7.77061	7.87433	7.15153	7.46244	7.37115	6.88802	7.1101	7.27413	7.1392	7.20973	7.4459
ENSMUSG00000038914	0.025754	0.373385	0.411828	0.359624	0.073321	0.192677	n	2			6.98482	7.05888	6.89349	6.72055	6.71989	6.83953	6.69103	6.9222	6.99828	6.88037	7.203	7.18634
ENSMUSG00000039033	0.10961	0.241878	0.544746	0.820416	0.791575	0.899478	n	2			6.48702	6.86189	6.76986	6.13693	6.46822	6.50937	6.18161	6.33797	6.7453	5.85496	6.64272	6.91516
ENSMUSG00000039046	0.0919587	0.492919	0.190422	0.0920268	0.72326	0.115824	n	2			6.6743	6.62309	6.63838	6.6981	6.84263	6.75286	6.64814	6.66191	6.47137	6.64649	6.91743	6.83532
ENSMUSG00000039050	0.449124	0.0108639	0.00291874	0.0246585	0.00532515	0.0664036	y	2	intermediate		7.48245	7.47771	7.32027	7.51579	7.57209	7.38557	7.67914	7.8115	7.73773	7.83871	7.87902	8.01069
ENSMUSG00000039117	0.418486	0.616056	0.48206	0.833011	0.846016	0.732017	n	2			6.44143	6.58484	6.59019	6.5085	6.58177	6.86121	6.53305	6.45292	6.85517	6.54742	6.48323	7.0531
ENSMUSG00000039128	0.378552	0.394589	0.411434	0.204466	0.624712	0.230325	n	2			9.00175	9.12138	9.1322	8.93178	9.0992	9.03336	9.01428	9.31219	9.22135	8.67825	8.96928	9.16671
ENSMUSG00000039157	0.992358	0.112994	0.597873	0.11258	0.597783	0.0851556	n	2			7.46566	7.718	7.62803	7.55124	7.51861	7.73875	7.84242	7.78739	8.23238	7.38845	7.37797	7.77954
ENSMUSG00000039205	0.00739804	0.00386037	0.000376679	0.415147	0.00720173	0.00670185	n	2			9.27156	9.1332	9.06941	8.73968	8.64638	8.70477	8.73209	8.64638	8.51232	8.26197	8.03376	8.16864
ENSMUSG00000039263	0.104988	0.321888	0.239742	0.532381	0.585449	0.908104	n	2			7.31931	6.9685	7.09059	7.81868	7.26946	7.53212	7.73942	7.2312	7.15082	7.6581	7.0934	7.46134
ENSMUSG00000039449	0.819637	0.135965	0.81971	0.0781277	0.883598	0.371011	n	2			7.04592	6.95602	6.86067	6.87457	6.99385	6.94713	7.02725	7.19617	7.05657	6.65978	6.87457	7.2018
ENSMUSG00000039515	0.357798	0.339799	0.810623	0.993279	0.629085	0.619705	n	2			9.72629	9.39417	9.30776	9.87493	9.4837	9.60633	9.85167	9.6296	9.4879	9.89983	9.46146	9.24592
ENSMUSG00000039536	0.903078	0.921696	0.801941	0.988805	0.667291	0.774946	n	2			7.50899	7.61564	7.64937	7.54141	7.59749	7.65607	7.50388	7.57393	7.72045	7.53986	7.55124	7.64016
ENSMUSG00000039648	0.120217	0.189476	0.0626628	0.895319	0.122604	0.130583	n	2			6.76296	6.53928	6.5586	6.55303	6.27988	6.39574	6.28334	6.62876	6.25551	6.20463	5.99664	5.49799
ENSMUSG00000039804	0.456901	0.624742	0.770245	0.198733	0.397558	0.942097	n	2			8.72409	8.48399	8.43586	8.70806	8.50101	8.71698	8.61138	8.36294	8.48736	8.70606	8.52588	8.26437
ENSMUSG00000039826	0.0660695	0.0314157	0.268815	0.142538	0.0316679	0.010916	n	2			6.10758	6.12425	6.04843	5.92457	6.02239	5.84981	5.70475	5.9109	5.71438	6.16042	6.09094	6.28434
ENSMUSG00000039834	0.219206	0.0188075	0.107768	0.653893	0.429323	0.570825	n	2			6.76986	6.77287	6.72402	6.7554	6.61744	6.48601	6.52179	6.63691	6.57287	6.62744	6.57858	6.34371
ENSMUSG00000039844	0.793669	0.355885	0.209198	0.463381	0.130293	0.0772486	n	2			8.39156	8.02613	7.99558	8.3216	7.93394	8.01193	8.173	7.95882	7.68858	8.47928	8.33493	8.28086
ENSMUSG00000039983	0.169993	0.15676	0.0202489	0.897822	0.0587823	0.00250541	n	2			6.22035	6.43611	6.15616	6.41151	6.36289	6.63166	6.43545	6.45462	6.47972	6.73744	6.73456	6.81751
ENSMUSG00000040084	0.482121	0.0911978	0.0658823	0.33725	0.0741796	0.0183923	n	2			8.75904	8.63303	8.56563	8.67825	8.63225	8.41366	8.45291	8.57656	8.35112	8.8076	8.81645	8.88603
ENSMUSG00000040549	0.510923	0.244799	0.507189	0.249169	0.996777	0.243892	n	2			9.0539	9.01153	9.13521	8.96178	9.15359	8.89061	9.17001	9.11024	9.10006	8.86985	9.13678	9.00077
ENSMUSG00000040591	0.928255	0.515042	0.00895969	0.62028	0.0797014	0.0723073	n	2			8.4833	8.52274	8.48952	8.49375	8.60601	8.37529	8.37966	8.59304	8.33493	8.66849	8.7452	8.66131
ENSMUSG00000041966	0.108686	0.00970203	0.00855647	0.0561399	0.0339562	0.450465	n	2			7.55335	7.73445	7.70689	7.39069	7.52818	7.58159	7.1744	7.27267	7.38557	7.05393	7.24314	7.29556
ENSMUSG00000041975	0.0373584	0.329481	0.0187514	0.710265	0.0482348	0.0340363	n	2			5.25531	5.38625	5.38625	5.49799	5.57907	5.47054	5.28947	5.63483	5.49124	5.88469	5.77926	6.13548
ENSMUSG00000042133	0.887025	0.882893	0.798162	0.95814	0.670404	0.717507	n	2			7.84242	7.65659	7.55396	7.79743	7.64839	7.65216	7.89178	7.50853	7.71853	7.83581	7.5602	7.55396
ENSMUSG00000042272	0.0119053	0.0192454	0.347077	0.419379	0.459014	0.68905	n	2			7.49304	7.51249	7.44115	7.2312	7.34702	7.27149	7.38845	7.29162	7.29504	7.19617	7.39761	7.51384
ENSMUSG00000042369	0.00764949	0.00213529	0.00863368	0.160879	0.320237	0.854129	n	2			7.39884	7.15224	7.15082	7.67541	7.97491	7.83693	7.8842	8.05746	8.13878	7.78439	8.01401	8.19798
ENSMUSG00000042548	0.0109757	0.00496626	0.269038	0.0477483	0.227245	0.0725697	y	2	lower		8.72851	8.66131	8.63529	8.54551	8.46698	8.51668	8.44584	8.43132	8.40259	8.55539	8.5358	8.69854
ENSMUSG00000042814	0.934585	0.0138367	0.0540906	0.0148776	0.0543257	0.364145	y	2	lower		9.70719	9.64568	9.74794	9.63059	9.72927	9.75355	9.4073	9.5483	9.47378	9.44988	9.56377	9.60633
ENSMUSG00000042821	0.370107	0.179443	0.653372	0.377246	0.71272	0.266851	n	2			5.484	5.43207	5.45737	5.56699	5.00017	5.24131	5.28773	5.1359	4.51732	5.66818	5.37261	5.05441
ENSMUSG00000043110	0.193581	0.040014	0.237571	0.0220339	0.809814	0.0491097	y	2	higher		4.9643	4.9317	4.20037	5.30194	5.10062	5.10739	5.90873	5.66818	5.529	4.93747	4.98666	5.44637
ENSMUSG00000043241	0.414227	0.322526	0.475911	0.907422	0.245109	0.239597	n	2			8.81324	9.01499	8.96928	8.64036	9.02321	8.77317	8.69692	8.86173	8.92758	8.7938	9.11177	9.26817
ENSMUSG00000043909	0.448053	0.0691225	0.0453551	0.50641	0.252449	0.386196	n	2			7.88725	7.92963	7.89366	8.02613	8.20754	7.80445	8.0923	8.22461	8.01763	8.06434	8.25254	8.2855
ENSMUSG00000044308	0.293848	0.14713	0.199218	0.297513	0.407854	0.84935	n	2			7.39418	7.47117	7.49794	7.46679	7.66278	7.49541	7.51147	7.69164	7.88828	7.4855	7.63426	7.87595
ENSMUSG00000044627	0.0971963	0.0703838	0.156341	0.71878	0.0502536	0.0415458	n	2			10.2364	10.4862	10.2703	10.4238	10.6004	10.6339	10.5575	10.4874	10.7245	10.185	10.1497	9.73224
ENSMUSG00000047617	0.00357447	0.408453	0.0392573	0.00804166	0.410121	0.0499334	y	2	intermediate		7.60501	7.44737	7.60874	8.02772	7.97859	8.08397	7.60427	7.73445	7.53914	8.34084	8.32555	7.8865
ENSMUSG00000047909	0.00113718	0.0127972	0.0323361	0.924188	0.701435	0.692981	n	2			6.77621	6.68992	6.63743	6.20956	6.31514	6.21104	6.30786	6.0817	6.31967	6.15005	6.24791	6.46626
ENSMUSG00000048204	0.190355	0.501006	0.337441	0.108027	0.905208	0.198259	n	2			9.36432	9.52556	9.53252	9.4917	9.76564	9.63138	9.27632	9.40479	9.53438	9.39685	9.70719	9.73343
ENSMUSG00000048486	0.00476518	0.727624	0.451167	0.0892973	0.00662692	0.465366	n	2			7.18404	7.18478	7.24817	7.48025	7.45178	7.37863	7.37115	7.20366	7.12983	7.24051	7.10619	7.15502
ENSMUSG00000048647	0.866569	0.0477485	0.266713	0.145858	0.367754	0.642714	n	2			7.54883	7.59651	7.58819	7.51736	7.6645	7.52351	7.4051	7.51437	7.46318	7.39176	7.50546	7.58365
ENSMUSG00000049044	0.260088	0.0171096	0.00544495	0.122181	0.035732	0.195343	n	2			6.09786	6.40532	6.44427	5.82975	6.32323	6.08012	5.53736	5.88845	5.75089	5.42978	5.39212	5.69913
ENSMUSG00000050373	0.0138617	0.0621188	0.152053	0.397589	0.293312	0.420789	n	2			6.25955	6.20229	6.30718	6.13881	6.05417	6.05322	6.05574	6.09445	5.84981	6.17358	5.73273	5.45101
ENSMUSG00000051149	0.252751	0.0779001	0.218285	0.251169	0.902564	0.29063	n	2			10.0149	10.1211	10.0919	10.1157	10.3309	10.1184	10.1894	10.3401	10.4862	10.0574	10.2837	10.2636
ENSMUSG00000051154	0.162781	0.386462	0.0708378	0.305054	0.404534	0.108504	n	2			9.44106	9.7143	9.79991	9.7372	9.90831	10.0139	9.67949	9.8189	9.82043	9.8392	10.0103	10.1441
ENSMUSG00000051329	0.0389245	0.0700656	0.206376	0.795393	0.50347	0.654541	n	2			8.08359	8.49008	8.34846	7.4855	7.83581	7.93818	7.51517	7.86717	8.05072	7.53665	8.06732	8.20297
ENSMUSG00000051413	0.416077	0.17222	0.428302	0.592808	0.899885	0.479977	n	2			6.33514	6.00391	6.02347	6.14957	5.54489	6.06074	6.06575	5.47054	5.7745	6.13881	5.64034	6.07474
ENSMUSG00000051730	0.104657	0.00113649	0.112007	0.116812	0.644099	0.342444	n	2			7.57155	7.61205	7.63527	7.71536	8.03376	7.83782	8.02386	8.13932	8.11719	7.69533	8.02558	8.09947
ENSMUSG00000052033	0.10186	0.102518	0.311997	0.410974	0.785183	0.365018	n	2			8.42133	8.44508	8.48864	8.51232	8.76063	8.70055	8.56441	8.97447	8.83307	8.48517	8.50101	8.86013
ENSMUSG00000052056	0.0315054	0.0281678	0.0277337	0.295164	0.633275	0.909156	n	2			8.77895	8.58455	8.4556	9.04256	9.07412	8.91221	9.12896	9.028	9.08706	9.23531	9.07637	8.89313
ENSMUSG00000052155	0.246016	0.0571325	0.0147652	0.0206213	0.0374246	0.00344852	y	2	lower		7.484	7.64602	7.54883	7.59081	7.61884	7.72098	7.27196	7.32027	7.47028	7.74973	7.90899	7.91556
ENSMUSG00000053746	0.000655554	0.000479676	0.000528924	0.374787	0.0543539	0.367953	n	2			8.06293	7.9553	7.84099	7.15224	7.08499	6.9978	7.07713	7.04864	6.86793	6.87227	6.89009	6.99385
ENSMUSG00000054455	0.0493216	0.258592	0.294238	0.959055	0.874736	0.871364	n	2			8.79734	8.58777	8.50809	9.72247	9.09215	9.90375	10.3874	8.36445	10.081	10.3816	9.64568	8.35824
ENSMUSG00000055371	0.0225425	0.00740141	0.158478	0.147077	0.276986	0.0530835	n	2			7.31058	7.31848	7.36964	7.08194	7.20654	7.1672	6.99948	7.12659	7.04864	7.14169	7.23696	7.31058
ENSMUSG00000055943	0.00674241	0.00450349	0.00438351	0.0229475	0.260244	0.0620399	y	2	higher		9.96448	9.99648	9.95705	10.1441	10.1396	10.0801	10.2401	10.3141	10.2176	10.1716	10.1184	10.1925
ENSMUSG00000057110	0.278936	0.899692	0.642643	0.49757	0.479652	0.623248	n	2			7.05817	6.89848	6.97363	7.26358	6.9273	7.18973	7.22377	6.74419	7.02369	7.49465	6.78782	5.89507
ENSMUSG00000057378	0.037039	0.0675799	0.0208399	0.654831	0.0263497	0.0239155	n	2			7.40601	7.34636	7.4153	7.16996	7.2455	7.05817	6.99113	7.26666	7.07213	6.07823	6.38504	6.61995
ENSMUSG00000057738	0.567996	0.0952671	0.869787	0.11517	0.317102	0.0353004	n	2			9.95031	9.71015	9.71015	9.95938	9.79991	9.79371	10.1304	9.95138	9.95502	9.84685	9.755	9.72122
ENSMUSG00000058318	0.369255	0.136983	0.432806	0.0299473	0.320542	0.722575	n	2			7.97859	7.71954	7.69923	8.03616	7.93105	7.78365	7.66407	7.57971	7.53819	7.9962	7.57487	6.76862
ENSMUSG00000058793	0.0925268	0.0810181	0.00610845	0.235678	0.0249288	0.112884	n	2			6.96559	7.02315	7.06702	6.91859	6.95725	6.93276	6.88128	6.90486	6.70097	6.56985	6.68406	6.7334
ENSMUSG00000060227	0.732976	0.181915	0.0774731	0.127409	0.138235	0.0124194	n	2			8.21359	8.46256	8.40214	8.28685	8.35637	8.55602	8.25194	8.06586	8.27486	8.52631	8.55927	8.66074
ENSMUSG00000061136	0.527317	0.582012	0.682211	0.95856	0.85315	0.845039	n	2			9.07569	8.44623	8.45222	8.70523	8.14645	8.56441	8.95778	8.04906	8.35637	8.9542	8.28211	8.34176
ENSMUSG00000062661	0.641004	0.164076	0.562455	0.0816742	0.340498	0.447781	n	2			6.34508	5.74267	5.79147	6.23057	5.75089	6.28715	5.84981	5.44823	5.20513	6.24228	5.44076	5.60369
ENSMUSG00000064289	0.12037	0.811611	0.0461911	0.14141	0.390081	0.0541217	n	2			6.42647	6.49943	6.64718	6.04431	6.33959	6.39475	6.40155	6.47798	6.80173	5.90401	6.1231	6.29688
ENSMUSG00000067787	0.0199088	0.000569669	0.0145868	0.0118023	0.6725	0.0177695	y	2	higher		7.00335	7.07464	7.03871	7.26946	7.24605	7.15028	7.40933	7.489	7.39996	7.22419	7.1952	7.31715
ENSMUSG00000068115	0.582234	0.941853	0.232291	0.558277	0.434989	0.245659	n	2			7.09551	7.67541	7.82936	7.04317	7.70363	7.32498	7.19617	7.44254	8.03979	6.93276	7.1365	7.38961
ENSMUSG00000068290	0.234019	0.128849	0.15582	0.530806	0.393425	0.691516	n	2			8.45291	8.36068	8.46156	8.59686	8.49127	8.43444	8.60192	8.62755	8.44584	8.49888	8.54035	8.76609
ENSMUSG00000068479	0.820519	0.772866	0.32568	0.962812	0.446974	0.386281	n	2			7.40709	7.27072	7.34924	7.65966	7.20254	7.27678	7.4788	7.20879	7.42662	7.83488	7.65412	7.23038
ENSMUSG00000068580	0.75623	0.598991	0.026865	0.711426	0.0323936	0.181129	n	2			8.65575	8.59113	8.67891	8.58119	8.60268	8.69743	8.43295	8.69692	8.64303	8.3768	8.39582	8.52486
ENSMUSG00000068735	0.307313	0.93129	0.596457	0.22777	0.948603	0.568434	n	2			7.98961	7.57209	7.62981	8.10418	7.76276	7.90542	7.89366	7.73171	7.5193	8.52072	7.98349	7.34421
ENSMUSG00000068966	0.0276063	0.21092	0.378538	0.798911	0.0404899	0.106053	n	2			6.19575	6.18009	6.17923	5.96212	5.84251	5.98614	5.75982	5.96301	6.17673	6.10555	6.38158	6.37273
ENSMUSG00000069020	0.768284	0.373207	0.549716	0.479203	0.698542	0.758427	n	2			7.19966	6.59294	6.51656	7.03982	6.31706	6.66809	7.02078	5.90873	6.14775	7.13236	6.36102	6.04567
ENSMUSG00000069495	0.617538	0.256721	0.973656	0.133984	0.624907	0.296227	n	2			7.41319	7.65283	7.66692	7.43712	7.66222	7.45588	7.63256	7.66692	7.92593	7.42422	7.56779	7.75423
ENSMUSG00000070730	0.133759	0.471256	0.474057	0.608591	0.846576	0.85187	n	2			7.10292	7.14821	7.16621	6.91392	7.11385	6.97246	6.88437	7.1736	7.12266	6.8052	7.04497	7.23801
ENSMUSG00000072980	0.103013	0.301118	0.0725322	0.329539	0.312571	0.167052	n	2			6.59743	6.48773	6.70048	6.69655	6.7853	6.78635	6.61744	6.7853	6.66621	6.82221	6.75635	7.06321
ENSMUSG00000074582	0.0859008	0.390344	0.0203702	0.0905583	0.109103	0.0335915	n	2			8.67493	8.37212	8.45686	8.76488	8.65984	8.84692	8.63058	8.5855	8.58229	9.07973	8.86893	8.87436
ENSMUSG00000074682	0.235363	0.739963	0.00636566	0.266437	0.0445763	0.0342644	n	2			7.07164	7.19704	7.24379	7.00584	6.9413	7.18478	7.178	7.05022	7.41391	6.81364	6.66037	6.83953
ENSMUSG00000075376	0.589878	0.675895	0.684435	0.430467	0.731245	0.493811	n	2			7.30978	7.17145	7.14963	7.07916	7.31118	7.07545	7.29941	7.09616	7.36609	7.16274	7.18478	7.21128
ENSMUSG00000075419	0.25444	0.378156	0.81196	0.928066	0.312401	0.426184	n	2			6.44876	6.46134	6.45564	6.64718	6.51717	6.46185	6.68348	6.58271	6.3898	6.49352	6.39475	6.50616
ENSMUSG00000075467	0.287728	0.120415	0.195598	0.0735792	0.0551323	0.220754	n	2			6.91516	7.04265	7.10931	7.0071	7.16125	7.20003	6.81806	6.79225	6.35769	6.93556	6.8641	6.94942
ENSMUSG00000076434	0.01795	0.0176921	0.00157619	0.376159	0.0229574	0.0865553	n	2			8.64586	8.43904	8.41184	8.08485	8.10345	7.79581	7.7984	8.06881	7.62945	7.38247	7.47204	7.48197
ENSMUSG00000078137	0.00560078	0.00679378	0.0518971	0.762871	0.722171	0.628218	n	2			6.11339	5.92019	5.76154	5.2598	5.29681	5.02303	5.09173	5.30527	5.28947	5.04235	4.72234	5.52033
ENSMUSG00000078201	0.335911	0.310334	0.0718458	0.936727	0.727451	0.808063	n	2			7.9351	7.79685	7.72045	7.86895	7.66601	7.4696	7.76818	7.77775	7.41665	7.71536	7.55278	7.59108
ENSMUSG00000079037	0.0448777	0.0242298	0.70408	0.297834	0.0479542	0.0307898	n	2			8.03677	8.12034	8.26437	8.44152	8.40214	8.32555	8.63303	8.38174	8.46531	8.05988	8.24939	8.22116
ENSMUSG00000079043	0.161383	0.0623751	0.00327338	0.990761	0.0218684	0.00395597	n	2			6.46822	6.44699	6.51048	6.0326	6.41058	6.2712	6.10758	6.29063	6.321	5.61149	5.67048	5.81423
ENSMUSG00000079421	0.00277478	0.159448	0.0270599	0.00318054	0.372731	0.0184886	y	2	lower		6.16462	5.99548	6.17358	6.95602	6.9685	7.00626	6.05955	5.98045	5.8261	6.81872	7.52978	7.29754
ENSMUSG00000001418	0.0306269	0.00355476	0.435985	0.0374988	0.822836	0.29132	y	3	higher	SO	6.7931	6.90723	6.89434	7.0934	6.98371	7.00388	7.24728	7.12461	7.16435	7.1952	7.03759	6.74591
ENSMUSG00000002233	0.589431	0.00595413	0.154019	0.116709	0.441203	0.213922	n	3		SO	5.66363	5.85968	5.66818	6.0206	5.95823	5.52298	6.23943	6.29688	6.18009	6.09445	6.17826	5.75258
ENSMUSG00000015714	0.889142	0.0992222	0.383645	0.198423	0.403596	0.0414525	n	3		SO	6.88688	7.03709	7.21348	6.89935	7.3458	6.96771	7.14346	7.40709	7.46746	6.70687	6.94048	7.07164
ENSMUSG00000015750	0.827482	0.420896	0.327004	0.403629	0.558726	0.164533	n	3		SO	6.5924	6.00491	6.24864	6.67996	6.65014	5.76154	6.53471	5.80109	5.59374	6.99223	6.64201	6.18886
ENSMUSG00000019528	0.0328015	0.00939732	0.0475482	0.0515341	0.224071	0.656879	n	3		SO	5.5842	5.74126	5.63157	5.89396	6.23057	6.14152	6.28238	6.61397	6.64316	6.08012	6.42322	6.71863
ENSMUSG00000027499	0.578916	0.237031	0.106079	0.34489	0.153724	0.340002	n	3		SO	3.72194	4.28707	3.93559	4.06453	4.30633	3.93559	4.06453	4.3412	4.36971	4.20037	4.44688	4.81333
ENSMUSG00000027712	0.105953	0.0211118	0.0205866	0.00227961	0.105145	0.747582	y	3	higher	SO	7.44544	7.73875	7.73619	7.90367	7.95314	7.83321	8.22983	8.27618	8.19718	8.03734	8.13426	8.40761
ENSMUSG00000027777	0.0143923	0.00378227	0.0972269	0.155594	0.313866	0.136777	n	3		SO	6.19817	6.50228	6.54742	5.66363	5.77085	5.64966	5.40138	5.67489	5.49799	5.5842	6.03572	6.18009
ENSMUSG00000027848	0.000990103	0.0820229	0.0224605	0.120054	0.122324	0.0348583	n	3		SO	6.64946	6.5187	6.42647	5.76714	5.629	5.7237	6.38654	5.90401	5.9692	4.86193	4.77343	5.56699
ENSMUSG00000027955	0.833836	0.039305	0.564592	0.00474659	0.312324	0.0284511	y	3	higher	SO	4.64564	5.07977	5.16705	5.07977	4.88263	4.80597	5.44357	5.60886	5.74126	4.87244	5.12573	5.27191
ENSMUSG00000028005	0.0882001	0.120879	0.729634	0.977579	0.0969305	0.103236	n	3		SO	4.84987	4.44688	4.83778	4.40524	4.3412	4.24067	4.40524	4.53106	4.06453	5.03946	4.48045	4.84987
ENSMUSG00000028019	0.807951	0.021164	0.476304	0.053226	0.551441	0.505038	n	3		SO	5.79625	5.93836	5.91853	5.81877	6.0326	5.86371	6.07598	6.09178	6.23466	5.71996	6.16462	6.15616
ENSMUSG00000028048	0.341319	0.249203	0.438038	0.556222	0.183755	0.142243	n	3		SO	6.33622	6.41629	6.43218	6.34965	6.40532	6.22967	6.15465	6.42489	6.21577	6.34225	6.48043	6.53471
ENSMUSG00000028063	0.603548	0.120576	0.244589	0.244057	0.483467	0.574461	n	3		SO	7.73875	7.34168	7.43547	7.64788	7.29941	7.28357	7.3725	7.1796	7.05702	7.47837	7.26708	7.11865
ENSMUSG00000028126	0.349396	0.963224	0.242959	0.48703	0.991032	0.456147	n	3		SO	7.2018	7.18109	7.05939	7.18749	6.70144	7.03168	7.37618	6.77706	7.31931	7.1378	7.0099	6.76643
ENSMUSG00000028164	0.0151782	0.0171546	0.00657244	0.242865	0.125109	0.0671039	n	3		SO	5.28389	5.48705	5.53736	5.90401	5.97651	5.87669	5.90762	5.74267	5.86196	6.14152	6.02239	6.3898
ENSMUSG00000028191	0.0114793	0.0188124	0.0307431	0.12382	0.280668	0.0881127	n	3		SO	7.11913	7.13809	7.20121	6.87384	6.94417	6.78471	7.05022	6.95213	6.94298	6.66672	6.91015	6.65313
ENSMUSG00000028273	0.922183	0.978448	0.280551	0.938696	0.333429	0.413154	n	3		SO	4.09413	3.99561	3.99561	4.09413	3.87157	4.14899	4.20037	3.72194	4.14899	4.40524	3.99561	4.20037
ENSMUSG00000036503	0.544132	0.104047	0.967621	0.0291317	0.507882	0.10562	n	3		SO	7.21861	7.49133	7.5608	7.23642	7.43031	7.36162	7.54079	7.77256	7.8147	7.25036	7.43547	7.60384
ENSMUSG00000037111	0.449538	0.0966939	0.378545	0.535284	0.673937	0.169299	n	3		SO	5.62214	5.67155	5.74126	5.38847	5.78153	5.54172	5.58129	5.51639	5.33247	5.67292	5.65721	5.55328
ENSMUSG00000037625	0.698469	0.0513429	0.821139	0.0740034	0.467361	0.0403995	n	3		SO	9.02989	9.3993	9.43876	9.25871	9.35964	9.4309	9.82043	9.62707	10.188	9.09669	9.18432	9.46309
ENSMUSG00000038975	0.816757	0.113356	0.140863	0.0766544	0.117384	0.854183	n	3		SO	6.72152	7.03254	6.86189	6.79599	6.95136	6.79	7.00924	7.34022	7.08499	6.91789	7.25229	7.36303
ENSMUSG00000040151	0.0252242	0.0355431	0.0217382	0.955217	0.462512	0.412379	n	3		SO	6.44699	6.34225	6.25955	6.5883	6.52813	6.67364	6.56392	6.5924	6.62529	6.72728	6.5322	6.71989
ENSMUSG00000040322	0.0239359	0.196312	0.393325	0.82822	0.331732	0.549233	n	3		SO	5.99363	6.21504	6.21021	5.74126	5.83513	5.74267	5.46796	5.98354	5.99754	5.70044	5.97056	6.23466
ENSMUSG00000041084	0.494349	0.166158	0.914547	0.473824	0.675478	0.309184	n	3		SO	8.51791	8.64586	8.64141	8.57123	8.87436	8.60601	8.63529	8.95078	8.77895	8.40152	8.65196	8.79518
ENSMUSG00000041959	0.00114721	0.00240425	0.114578	0.049539	0.624966	0.123084	y	3	higher	SO	6.30359	6.3898	6.47485	6.94251	6.99464	7.04944	7.16435	7.41883	7.45296	6.60715	6.79599	7.25281
ENSMUSG00000053819	0.0904198	0.0551612	0.11002	0.583532	0.762884	0.517293	n	3		SO	5.12219	5.20907	4.87737	5.40138	5.35302	5.35724	5.53196	5.2517	5.50142	5.24843	5.2598	5.5132
ENSMUSG00000054414	0.434833	0.232696	0.87272	0.434578	0.298012	0.143051	n	3		SO	5.83121	5.72772	6.07925	5.86099	6.07598	6.02783	6.0681	5.99664	6.0952	5.71438	5.83742	6.01645
ENSMUSG00000068739	0.116175	9.13475e-05	0.429352	0.33625	0.65146	0.316901	n	3		SO	7.81639	7.84099	7.85931	7.99464	8.19996	7.94202	8.12264	8.17045	8.13932	7.98961	8.18762	7.73013
ENSMUSG00000074457	0.085045	0.231626	0.0404164	0.736283	0.998273	0.714889	n	3		SO	5.51639	5.73049	5.69312	5.88469	6.10998	5.78153	5.72882	6.12744	5.74267	5.85095	5.86815	6.05629
ENSMUSG00000074513	0.661378	0.151232	0.899413	0.525935	0.69292	0.149588	n	3		SO	6.51196	6.69752	6.79074	6.64056	7.09851	6.53928	6.80077	7.1056	6.79738	6.59294	6.75038	6.6955
ENSMUSG00000002228	0.984267	0.386026	0.430121	0.444331	0.431684	0.660605	n	3		PM	10.1962	9.86255	9.90112	10.2126	9.72247	10.0361	10.0672	9.74304	9.68587	10.1117	9.85048	9.00925
ENSMUSG00000005493	0.149117	0.194745	0.0664437	0.679532	0.12403	0.173482	n	3		PM	7.644	7.7891	7.81868	7.78781	7.99464	7.90133	7.73697	8.05165	8.06149	7.96213	8.39098	8.46256
ENSMUSG00000005628	0.000435088	0.0329388	0.000783974	0.081884	0.000958847	0.00331865	n	3		PM	7.0531	7.03045	7.0526	7.85576	7.91385	7.82591	7.48313	7.75765	7.45021	8.62272	8.53652	8.45847
ENSMUSG00000008730	0.000217625	0.553633	0.00306309	0.00819669	0.0628702	0.00152687	y	3	intermediate	PM	8.57656	8.4747	8.47766	9.15491	9.07196	9.08317	8.69398	8.4747	8.51155	9.49946	9.38229	9.23086
ENSMUSG00000012042	0.0433399	0.0353166	0.0353728	0.321535	0.668961	0.51615	n	3		PM	9.29948	9.4837	9.45823	8.9021	9.12464	9.20362	8.66249	9.05762	8.9896	8.89061	8.94541	9.2096
ENSMUSG00000025762	0.0881132	0.00673773	0.270916	0.220289	0.311864	0.0390204	n	3		PM	7.93777	7.99396	8.12607	7.70913	7.90749	7.5354	7.59749	7.59592	7.37949	7.70363	7.93907	7.99744
ENSMUSG00000027530	0.379285	0.0179407	0.0296663	0.0134898	0.0122873	0.00134156	y	3	lower	PM	9.9181	9.86145	9.87075	9.76093	9.90612	9.84004	9.51158	9.58669	9.37505	10.0983	10.2736	10.3222
ENSMUSG00000027564	0.000728518	0.0952281	0.187853	0.857297	0.69853	0.829467	n	3		PM	11.9475	11.9029	11.9571	12.1716	12.2424	12.1932	12.1716	12.3387	12.0438	12.0284	12.055	12.3738
ENSMUSG00000027601	0.00271769	0.00134002	0.000433718	0.27679	0.000236606	0.00107442	n	3		PM	10.991	11.0907	11.1329	10.6165	10.6634	10.6998	10.5639	10.5993	10.6682	10.2214	10.2332	10.2907
ENSMUSG00000027703	0.0480574	0.00324619	0.0126298	0.436728	0.735421	0.134235	n	3		PM	9.25319	9.37505	9.4429	8.75501	8.99772	9.12642	8.75696	8.83471	8.95688	8.90489	9.00077	9.11117
ENSMUSG00000027708	0.127231	0.218578	0.0912324	0.667591	0.751091	0.76844	n	3		PM	8.55295	8.72034	8.76305	8.75202	8.91652	8.83752	8.65575	8.96372	9.08361	8.79138	8.84446	8.93486
ENSMUSG00000027782	0.862793	0.418623	0.549368	0.319329	0.43043	0.813158	n	3		PM	9.69185	9.90243	10.0103	9.73343	9.92469	10.0156	9.575	9.78438	9.88974	9.62421	9.78132	9.94227
ENSMUSG00000027886	0.0225875	0.332589	0.0731034	0.0443711	0.344377	0.0358927	y	3	lower	PM	11.2727	11.206	11.2868	11.399	11.4153	11.399	11.1919	11.2764	11.1147	11.3524	11.5321	11.6071
ENSMUSG00000027905	0.626454	0.57879	0.0480461	0.440718	0.0304451	0.0522957	n	3		PM	11.2001	11.2216	11.2037	11.1689	11.0708	11.2815	11.2799	11.1426	11.3011	11.4093	11.3711	11.5506
ENSMUSG00000027927	0.288528	0.0745196	0.039652	0.0648272	0.140218	0.0175623	n	3		PM	11.1611	11.2973	11.2775	11.3272	11.4974	11.2413	11.1052	11.1754	11.0531	11.4504	11.7119	11.5068
ENSMUSG00000027938	0.20272	0.0156513	0.11394	0.0147915	0.296933	0.481171	y	3	lower	PM	11.1516	11.2622	11.3784	11.048	11.2073	11.1611	10.8519	10.8494	10.9379	10.75	11.1009	11.0853
ENSMUSG00000027956	0.625701	0.296433	0.130278	0.34936	0.16641	0.984232	n	3		PM	9.697	9.67478	9.80317	9.69185	9.76801	9.62421	9.82485	9.35065	9.30405	9.31478	9.66285	9.48949
ENSMUSG00000027977	0.779139	0.0810983	0.19597	0.0669598	0.245799	0.0331065	n	3		PM	6.26279	6.38504	6.40464	6.18269	6.54888	6.42938	5.83121	6.22093	5.85095	6.37484	6.66809	6.96058
ENSMUSG00000028009	0.00488991	0.00320158	0.000629124	0.588258	0.0147671	0.0171442	n	3		PM	7.17752	7.02652	7.16776	6.74954	6.73604	6.66562	6.76391	6.69315	6.5924	6.28434	6.47622	6.40111
ENSMUSG00000028059	0.684597	0.207086	0.288446	0.281985	0.401223	0.758709	n	3		PM	9.65825	9.34902	9.3843	9.53252	9.24913	9.44106	9.4837	8.97942	9.07196	9.52289	9.17782	9.04256
ENSMUSG00000028064	0.00226831	0.000274727	0.0186787	0.00397365	0.0188633	0.000591669	y	3	lower	PM	7.90188	7.78953	7.76527	7.34101	7.13112	7.24605	6.82092	6.7394	6.60888	7.47393	7.52447	7.65329
ENSMUSG00000028141	0.978524	0.860286	0.246145	0.732048	0.222139	0.251636	n	3		PM	12.7345	12.8632	12.8914	12.7984	12.8632	12.8229	12.7984	12.8229	12.8384	12.6013	12.7984	12.7685
ENSMUSG00000032854	0.00734159	0.444254	0.00969781	0.362317	0.442432	0.244599	n	3		PM	5.49418	5.60369	5.56699	5.89683	5.77317	5.92246	5.75831	5.41483	5.9063	5.9231	5.82975	6.02886
ENSMUSG00000033767	0.835504	0.0023022	0.119657	0.00702964	0.134788	0.000932544	y	3	lower	PM	8.76488	8.68121	8.65575	8.68702	8.71698	8.72187	8.17454	7.98996	7.99464	8.76063	8.77034	8.89061
ENSMUSG00000034151	0.0669874	0.0432435	0.351791	0.732485	0.572358	0.429458	n	3		PM	11.0593	11.1919	11.2348	10.7775	11.0547	10.8914	10.7256	10.999	10.875	10.743	11.1391	11.1286
ENSMUSG00000036432	0.715774	0.258278	0.740996	0.42356	0.580103	0.212068	n	3		PM	9.75438	9.61697	9.5874	9.755	9.38702	9.66882	9.71186	9.30996	9.329	9.77219	9.5483	9.72997
ENSMUSG00000036745	0.499837	0.0351689	0.0264059	0.042169	0.119064	0.00244272	y	3	lower	PM	8.32253	8.49509	8.57123	8.44623	8.46303	8.76488	8.17673	8.05924	8.25431	8.73607	8.75202	8.95778
ENSMUSG00000036825	0.960695	0.0459945	0.444349	0.040156	0.416639	0.198944	y	3	lower	PM	10.2618	10.361	10.3769	10.2821	10.3991	10.3263	10.2364	10.2126	10.1234	10.1894	10.3141	10.3439
ENSMUSG00000037737	0.00330159	0.74345	0.00328221	0.0108457	0.571598	0.007353	y	3	lower	PM	9.06625	9.05762	9.19139	9.47121	9.54749	9.40952	9.19449	9.06941	8.96785	9.42289	9.58486	9.53598
ENSMUSG00000038298	0.0158629	0.00381936	0.00148723	0.00486195	0.0102375	0.119388	y	3	lower	PM	10.9303	10.9095	10.8687	10.5174	10.6117	10.4057	10.109	9.95233	9.86683	10.0649	10.2287	10.1604
ENSMUSG00000038403	0.000238426	0.00232926	0.00173717	0.0133512	0.178824	0.00813676	y	3	intermediate	PM	5.96441	6.04273	6.00491	7.25777	7.42109	7.29584	6.8366	7.06802	6.95602	7.39941	7.41391	7.65412
ENSMUSG00000038997	0.718777	0.304186	0.730916	0.503623	0.571527	0.359216	n	3		PM	11.6723	11.7634	11.8013	11.6948	11.8261	11.7791	11.7667	11.7864	11.8492	11.5734	11.8133	11.7576
ENSMUSG00000041842	0.816871	0.119363	0.498068	0.0634357	0.261493	0.167953	n	3		PM	9.52815	9.04141	9.11794	9.49946	9.15746	9.17082	9.07637	8.79203	8.62413	9.16755	9.06213	9.08361
ENSMUSG00000042766	0.393783	0.158889	0.125493	0.341861	0.0212238	0.0429864	n	3		PM	7.8907	7.07272	7.17988	7.39027	6.77926	7.06802	7.29584	6.42647	6.33211	8.12125	8.03616	7.86364
ENSMUSG00000042943	0.988493	0.0117613	0.199232	0.0124681	0.199392	0.217935	y	3	lower	PM	10.8046	10.8716	10.9379	10.8002	10.9493	10.8672	10.6799	10.5698	10.5131	10.5738	10.7775	10.8302
ENSMUSG00000044468	0.307209	0.913332	0.0173669	0.520613	0.0472624	0.0884284	n	3		PM	11.7457	11.6948	11.7504	11.8154	11.7119	11.797	11.8261	11.6031	11.7374	11.9109	11.8444	11.9571
ENSMUSG00000048416	0.47454	0.925777	0.141487	0.341848	0.198705	0.0268212	n	3		PM	11.8681	12.1502	12.2634	11.8261	12.055	12.0623	12.014	12.0623	12.1666	11.7211	11.8752	11.8978
ENSMUSG00000048652	0.852756	0.297812	0.497883	0.295116	0.453279	0.794239	n	3		PM	10.1925	10.3796	10.4645	10.1716	10.5617	10.386	9.99454	10.2736	10.3076	9.99454	10.3356	10.3769
ENSMUSG00000049565	0.897415	0.0325996	0.342674	0.016835	0.327464	0.0212038	y	3	lower	PM	7.39445	7.39069	7.4051	7.34702	7.33735	7.48496	7.11749	6.9065	6.8486	7.30376	7.64839	7.69367
ENSMUSG00000050931	0.0532656	0.0119932	0.32839	0.0229412	0.804019	0.105261	y	3	lower	PM	9.45213	9.41962	9.45543	9.32986	9.30143	9.18564	9.12243	9.00534	8.94603	9.08967	9.39216	9.4309
ENSMUSG00000055891	0.159583	0.460527	0.0665437	0.0763973	0.263166	0.0374771	n	3		PM	11.2565	11.1186	11.1078	11.369	11.2018	11.2657	11.2018	11.093	11.0066	11.4974	11.4466	11.2512
ENSMUSG00000056260	0.182451	0.504267	0.513386	0.528487	0.414511	0.926748	n	3		PM	8.83251	9.40656	9.45046	8.48196	8.9021	9.03976	8.67748	8.89061	9.45046	8.66621	9.20156	9.23776
ENSMUSG00000056270	0.694633	0.0383127	0.0135484	0.123931	0.00720528	0.0421755	n	3		PM	6.43448	6.2643	6.26738	6.29688	6.61524	6.2264	6.07275	6.10998	6.04752	5.21947	5.42978	5.69312
ENSMUSG00000059834	0.611068	0.794871	0.0765757	0.388628	0.136483	0.0502942	n	3		PM	9.98203	10.3211	10.4	10.1002	10.5238	10.3739	10.0992	10.1993	10.285	10.4129	10.7476	10.8289
ENSMUSG00000069118	0.056964	0.0906196	0.242935	0.303537	0.172027	0.567071	n	3		PM	9.28644	9.38582	9.34755	8.77828	9.14372	8.86013	9.04661	9.26036	8.97513	8.98103	9.23158	9.31749
ENSMUSG00000070471	0.00164531	0.0053329	0.0151404	0.331697	0.0901777	0.165569	n	3		PM	9.55316	9.60262	9.66624	9.04088	9.11794	9.20229	8.99256	8.9311	9.1592	8.61842	8.70746	9.01428
ENSMUSG00000074264	0.0177017	0.00893674	0.557743	0.853912	0.27106	0.246648	n	3		PM	6.14775	6.45185	6.32797	6.91923	6.96337	6.63771	6.72728	6.94048	6.92564	6.30359	6.18367	6.95536
ENSMUSG00000074344	0.00437402	0.81505	0.105948	0.0303721	0.241522	0.163632	n	3		PM	10.188	10.1274	10.2618	10.4921	10.5749	10.4483	10.2978	10.2605	10.0785	10.2354	10.458	10.458
ENSMUSG00000074435	0.564337	0.437855	0.28781	0.977333	0.843451	0.711679	n	3		PM	12.9567	13.0496	12.9902	12.9266	12.9266	13.0496	12.9902	12.9266	12.9902	12.9902	12.9266	12.9567
ENSMUSG00000078667	0.304305	0.0925634	0.025832	0.1591	0.0438124	0.018526	n	3		PM	9.56847	9.59247	9.63374	9.61636	9.64027	9.87311	9.50337	9.52556	9.57574	9.92651	10.0065	10.1974
ENSMUSG00000000561	0.0876074	0.0149118	0.0137992	0.0799963	0.0719351	0.831519	n	3		MI	8.32311	8.37529	8.47036	8.49847	8.48586	8.55102	8.61363	8.59613	8.74469	8.57335	8.74041	8.68702
ENSMUSG00000004035	0.438017	0.0196575	0.987739	0.0350857	0.614697	0.112833	y	3	higher	MI	8.65754	8.80545	8.80545	8.72761	8.82826	8.88819	9.00857	9.05084	8.9542	8.60323	8.72557	8.93421
ENSMUSG00000005034	0.563195	0.120023	0.0959012	0.161006	0.146426	0.477277	n	3		MI	5.91853	5.75831	5.70621	5.87789	5.83633	5.80337	6.05061	5.84706	6.01499	6.064	5.89269	6.23797
ENSMUSG00000015749	0.0174082	0.0189498	0.0274476	0.22979	0.42748	0.181427	n	3		MI	6.90486	6.93944	7.12461	7.30721	7.40709	7.39445	7.63592	7.33735	7.70588	7.37949	7.31058	7.31567
ENSMUSG00000025437	0.346507	0.118498	0.120017	0.278477	0.204573	0.583718	n	3		MI	5.85968	6.10168	6.0366	5.97435	6.26279	6.11441	6.07925	6.34107	6.52349	6.10473	6.51251	6.73093
ENSMUSG00000027531	0.261382	0.834292	0.165655	0.183973	0.663178	0.122018	n	3		MI	8.38038	8.71698	8.72967	8.2105	8.62171	8.34084	8.45686	8.6877	8.783	8.0317	8.43667	8.44693
ENSMUSG00000027599	0.178136	0.0453807	0.403317	0.192748	0.172761	0.0789889	n	3		MI	7.16871	6.93047	7.00626	7.29504	7.13688	7.11816	7.42721	7.1826	7.39418	7.14591	6.85031	6.59672
ENSMUSG00000027660	0.614415	0.0775443	0.0388541	0.238267	0.073975	0.230358	n	3		MI	7.04028	6.95999	7.11333	7.02539	7.19361	7.01462	7.10972	7.17909	7.24051	7.15821	7.34636	7.35154
ENSMUSG00000027665	0.450948	0.342326	0.601282	0.689391	0.333357	0.274672	n	3		MI	5.93564	6.19081	6.26165	5.9791	5.99439	6.12819	5.95008	5.91472	6.13043	6.04843	6.10666	6.56162
ENSMUSG00000027706	0.0647532	0.0754391	0.431454	0.183885	0.450845	0.105676	n	3		MI	8.70477	8.66074	8.62702	8.91777	8.7464	8.81536	9.18508	8.81891	9.15568	8.81944	8.58119	8.83356
ENSMUSG00000027715	0.0598105	0.0220162	0.0135778	0.637613	0.0589715	0.0828588	n	3		MI	6.62937	6.64056	6.70204	6.7394	6.92354	6.86933	6.82586	6.84546	6.9692	6.94713	7.0735	7.15637
ENSMUSG00000027739	0.00135327	0.0475846	0.00217729	0.271603	0.00458094	0.00266566	n	3		MI	7.07213	7.18689	7.1914	6.30718	6.52509	6.40464	6.37118	6.63607	6.8332	5.41483	5.20513	5.6127
ENSMUSG00000027752	0.101918	0.125252	0.019163	0.304047	0.0272113	0.0246461	n	3		MI	7.24205	7.35389	7.27072	7.33286	7.42346	7.38508	7.33089	7.62681	7.54486	7.84984	8.09196	8.28622
ENSMUSG00000027794	0.535121	0.34638	0.229032	0.187037	0.344502	0.118488	n	3		MI	7.34968	7.4153	7.489	7.38247	7.54263	7.45385	7.25736	7.32721	7.44737	7.38878	7.6556	7.69753
ENSMUSG00000027828	0.148317	0.0160308	0.737785	0.0617542	0.454777	0.0350812	n	3		MI	8.34318	8.57931	8.48801	8.60744	8.65575	8.60966	8.91007	8.88915	9.20156	8.34634	8.4747	8.73546
ENSMUSG00000027834	0.0203321	0.0334763	0.0128885	0.705582	0.106539	0.224236	n	3		MI	6.43545	6.48043	6.5041	6.78232	7.03104	6.89935	6.89172	6.82586	7.14244	6.97987	7.16274	7.27678
ENSMUSG00000027879	0.664243	0.33667	0.341649	0.416632	0.460007	0.879054	n	3		MI	8.13319	8.38128	8.31684	8.35684	8.3682	8.22983	8.43972	8.38598	8.29531	8.25	8.43295	8.47825
ENSMUSG00000027881	0.762576	0.0973652	0.121629	0.0955495	0.0958519	0.442658	n	3		MI	7.43442	7.52943	7.43884	7.42258	7.5637	7.3458	7.53089	7.63823	7.75423	7.54769	7.77649	7.94874
ENSMUSG00000027882	0.18223	0.0650767	0.0736954	0.249298	0.201227	0.632799	n	3		MI	5.95948	6.24864	6.41399	6.34758	6.67996	6.41457	6.42751	6.85455	6.97004	6.46482	6.98876	7.23751
ENSMUSG00000027889	0.0404931	0.0473598	0.0159862	0.901087	0.528544	0.454128	n	3		MI	6.15392	6.37369	6.38364	6.5187	6.79678	6.59919	6.51001	6.78567	6.57235	6.57672	6.79225	6.76788
ENSMUSG00000027937	0.0283894	0.00160357	0.221695	0.00928711	0.0821859	0.0254788	y	3	higher	MI	8.08059	8.17454	8.1849	8.26437	8.33096	8.27981	8.46109	8.47766	8.56691	7.89738	7.84841	8.173
ENSMUSG00000027958	0.225206	0.0618934	0.154469	0.332529	0.56234	0.885085	n	3		MI	9.50742	9.65672	9.68806	9.64335	9.82387	9.7143	9.74122	9.78649	9.87075	9.70344	9.71692	9.93797
ENSMUSG00000027962	0.0310493	0.0688376	0.402171	0.0624715	0.00311641	0.0179472	n	3		MI	7.56316	8.16232	8.06947	8.71564	8.93486	8.72761	8.43855	8.48952	8.67416	8.06732	8.04564	8.28131
ENSMUSG00000027984	0.0437788	0.000147578	0.0245086	0.0163987	0.482151	0.0302107	y	3	higher	MI	8.85052	9.00175	8.9311	9.24016	9.43876	9.1322	9.69799	9.81457	9.82984	9.20362	9.38582	9.51932
ENSMUSG00000028015	0.0476507	0.00987462	0.35022	0.0589231	0.354188	0.030875	n	3		MI	6.60041	6.74954	6.7817	6.90939	6.96771	6.86461	7.03586	7.2142	7.29819	6.69179	6.78865	6.9685
ENSMUSG00000028044	0.0294194	0.0109291	0.31124	0.0190027	0.0948333	0.00854939	y	3	higher	MI	8.63529	8.68284	8.61904	8.75696	8.81366	8.71936	8.97028	9.03336	9.15802	8.3844	8.57422	8.65575
ENSMUSG00000028080	0.22439	0.0591205	0.518202	0.945948	0.72667	0.657234	n	3		MI	6.61879	6.5883	6.45185	6.76939	6.86315	6.53305	6.73688	6.80016	6.6524	6.41058	6.70097	6.86663
ENSMUSG00000028098	0.757936	0.168703	0.32974	0.189857	0.372537	0.644123	n	3		MI	7.8115	8.13563	8.09947	7.98597	8.10894	8.06379	8.15716	8.16652	8.52219	8.0134	8.13878	8.43444
ENSMUSG00000028101	0.131062	0.760669	0.968165	0.480397	0.342803	0.786256	n	3		MI	6.01499	6.0952	5.97307	5.90762	5.88604	6.00222	6.12528	6.01009	5.86371	6.18269	5.91229	5.9997
ENSMUSG00000028127	0.0269501	0.0105669	0.299885	0.0185607	0.591161	0.0353158	y	3	higher	MI	8.09828	8.03837	8.07526	8.26702	8.33413	8.19329	8.61675	8.46218	8.67493	8.10894	8.10497	8.39228
ENSMUSG00000028138	0.905149	0.0403899	0.809	0.0416836	0.857581	0.199282	y	3	higher	MI	8.31684	8.43586	8.43667	8.30317	8.55179	8.36719	8.65033	8.68844	8.93838	8.2474	8.30153	8.783
ENSMUSG00000028140	0.191717	0.223947	0.0822451	0.550231	0.14574	0.236546	n	3		MI	7.62229	7.59533	7.50479	7.49133	7.54883	7.47771	7.50664	7.54141	7.32081	7.1706	7.22164	7.47837
ENSMUSG00000028180	0.873965	0.00927207	0.498137	0.0921293	0.586823	0.353433	n	3		MI	8.14486	8.24212	8.23109	8.11079	8.37212	8.17924	8.43748	8.46439	8.46911	8.0968	8.30292	8.52588
ENSMUSG00000028199	0.99386	0.992763	0.0680498	0.999594	0.0677374	0.0680799	n	3		MI	6.34758	6.58352	6.53305	6.3898	6.69936	6.37182	6.39574	6.63166	6.43379	5.71298	6.11339	6.20339
ENSMUSG00000033161	0.994774	0.306051	0.631117	0.309771	0.64132	0.248722	n	3		MI	8.04795	8.21102	8.05328	8.17184	7.8121	8.33185	9.11634	7.91898	8.71121	8.54	7.87947	7.27521
ENSMUSG00000033910	0.180404	0.633569	0.41149	0.206181	0.155588	0.308146	n	3		MI	5.02753	5.14098	5.20513	5.10062	4.94975	4.98666	5.0873	5.05982	5.1359	5.02753	5.36727	5.31715
ENSMUSG00000034640	0.876118	0.574306	0.256204	0.588271	0.309287	0.180639	n	3		MI	7.06702	7.21284	7.24127	7.20879	6.73882	7.4596	7.43963	6.9231	7.5495	7.23266	6.67996	6.17476
ENSMUSG00000036832	0.359751	0.21162	0.096994	0.129091	0.134468	0.0532646	n	3		MI	8.34176	8.32388	8.34403	8.25061	7.97687	8.37041	8.52419	8.32511	8.57993	7.82339	7.33534	8.02558
ENSMUSG00000037161	0.0222386	0.00123914	0.0163343	0.0128717	0.640865	0.0243563	y	3	higher	MI	8.58648	8.79647	8.68006	8.93838	9.12718	8.94311	9.28365	9.3283	9.45412	8.93059	9.05465	9.16125
ENSMUSG00000037400	0.0376355	0.0306905	0.0635841	0.067337	0.11504	0.4581	n	3		MI	8.27735	8.27394	8.29329	8.37041	8.46531	8.40152	8.48049	8.6398	8.66194	8.58295	8.59536	8.92317
ENSMUSG00000037643	0.458245	0.0782475	0.401137	0.310458	0.906855	0.192807	n	3		MI	6.9685	7.18336	7.18404	6.99828	7.39176	7.29376	7.29886	7.31931	7.60353	7.06599	7.23969	7.32498
ENSMUSG00000038256	0.333092	0.161398	0.22736	0.351079	0.622017	0.566496	n	3		MI	5.32916	5.59524	5.50341	5.47528	5.69312	5.59224	5.65584	5.58129	5.99439	5.66363	5.48243	5.79147
ENSMUSG00000038393	0.653545	0.0217918	0.572402	0.0235029	0.525285	0.304757	y	3	higher	MI	8.52011	8.69743	8.84853	8.81275	8.84751	8.58777	9.27475	9.12642	9.02321	8.64141	9.1332	6.97867
ENSMUSG00000038612	0.337741	0.00548153	0.217403	0.181756	0.973591	0.0810044	n	3		MI	8.45686	8.56228	8.56862	8.58174	8.80602	8.52486	8.73546	8.82854	8.84919	8.51668	8.68919	8.69568
ENSMUSG00000038902	0.835325	0.0487792	0.175598	0.0456123	0.180975	0.721049	y	3	intermediate	MI	6.24527	6.3116	6.30786	6.32622	6.35312	6.2172	6.40363	6.55637	6.60555	6.35696	6.54174	6.85398
ENSMUSG00000039286	0.112392	0.0212405	0.525393	0.123661	0.331848	0.0491495	n	3		MI	7.4663	7.50853	7.50192	7.68598	7.78055	7.54806	7.89773	7.73013	7.90798	7.44873	7.50038	7.71424
ENSMUSG00000039988	0.841696	0.115355	0.318584	0.24861	0.353965	0.0585377	n	3		MI	8.85372	8.92608	8.88603	8.79647	8.79884	9.01919	8.82008	8.63136	8.78049	9.04416	8.8433	9.039
ENSMUSG00000040374	0.679026	0.0207736	0.197153	0.0792197	0.285018	0.745482	n	3		MI	7.19189	7.41721	7.38508	7.23434	7.59307	7.33929	7.5602	7.77343	7.77775	7.3229	7.70762	7.88586
ENSMUSG00000040774	0.962498	0.22456	0.263667	0.187408	0.240325	0.923841	n	3		MI	6.14522	6.43797	6.28095	6.17476	6.38836	6.2852	6.27988	6.6014	6.54742	6.23797	6.64649	6.59398
ENSMUSG00000040896	0.0411423	0.015015	0.00160279	0.0452283	0.00693241	0.769038	y	3	intermediate	MI	5.14098	5.26386	5.27916	5.33247	5.49124	5.42728	5.66165	5.67292	5.94067	5.78394	5.70159	5.89157
ENSMUSG00000041355	0.070874	0.00430663	0.833182	0.0373569	0.306312	0.0639996	y	3	higher	MI	8.62897	8.78158	8.86013	8.9184	9.14297	8.93617	9.19056	9.39417	9.28465	8.82826	9.03336	8.52219
ENSMUSG00000043300	0.000411289	0.00247985	0.000136295	0.263966	0.0196771	0.345133	n	3		MI	8.28211	8.46911	8.48254	9.29702	9.41219	9.52482	9.43409	9.52351	9.81667	9.65931	9.71926	9.82485
ENSMUSG00000044667	0.176597	0.0344489	0.00448876	0.0755663	0.452872	0.132816	n	3		MI	5.96056	6.0265	6.05574	6.01952	6.33343	6.25362	6.55026	6.365	6.7573	6.21962	6.31891	6.33453
ENSMUSG00000046818	0.082759	0.35292	0.174805	0.0506795	0.717546	0.0859849	n	3		MI	7.13568	7.08602	6.95892	7.20057	7.25161	7.20832	6.89009	7.09551	6.93775	7.46374	7.13688	7.18749
ENSMUSG00000047213	0.789813	0.313879	0.380692	0.232305	0.28952	0.935936	n	3		MI	6.57916	6.75635	6.8764	6.58484	6.8662	6.6577	6.70204	6.91599	7.0735	6.64946	6.96559	7.03531
ENSMUSG00000048332	0.0516975	0.000661673	0.549933	0.000575184	0.201016	0.120022	y	3	higher	MI	7.38878	7.3725	7.35389	7.30881	7.20003	7.24728	7.74737	7.68066	7.73225	7.38701	7.30132	7.65468
ENSMUSG00000058135	0.0811826	0.356921	0.0328632	0.17331	0.0382845	0.0349115	n	3		MI	11.369	11.5151	11.2993	11.2435	11.1147	10.87	11.4306	11.2132	11.2512	7.37009	8.93964	9.11634
ENSMUSG00000060671	0.752309	0.0389868	0.117504	0.0266484	0.127981	0.0112682	y	3	higher	MI	7.68235	7.74875	7.72938	7.69687	7.65607	7.76818	7.93974	7.87002	8.06048	7.58718	7.63197	7.39996
ENSMUSG00000061175	0.2239	0.152124	0.0204084	0.670399	0.0235127	0.0434694	n	3		MI	6.33694	6.03449	6.20158	6.29793	6.46268	6.27835	6.31061	6.51001	6.33622	6.56845	6.57997	6.72511
ENSMUSG00000068762	0.235028	0.0320316	0.359215	0.0811263	0.847362	0.188028	n	3		MI	8.14819	8.34031	8.32731	8.27177	8.4478	8.46025	8.48196	8.75992	8.78258	8.26847	8.33053	8.668
ENSMUSG00000068874	0.163085	0.0143466	0.19888	0.221411	0.75574	0.520285	n	3		MI	6.63166	6.57174	6.56072	7.19704	6.82737	6.69872	7.07545	7.09685	7.33065	6.9413	6.65169	7.39517
ENSMUSG00000074207	0.00281184	2.47617e-05	0.123192	0.602164	0.112147	0.105407	n	3		MI	7.12012	7.23266	7.12924	8.16542	8.42796	8.14769	8.28034	8.27105	8.35971	7.28357	7.84025	7.98869
ENSMUSG00000074238	0.0131173	0.0121046	0.0876621	0.234578	0.430212	0.88507	n	3		MI	7.84723	7.97687	8.04416	8.26275	8.3823	8.21277	8.30317	8.39156	8.58028	8.19718	8.38923	8.77828
ENSMUSG00000004032	0.84875	0.183503	0.518519	0.42265	0.766727	0.42265	n	3		ME	13.261	13.2125	13.2125	13.261	13.183	13.261	13.261	13.261	13.261	13.261	13.261	13.2125
ENSMUSG00000004127	0.00277304	0.00310317	0.051016	0.607113	0.122642	0.112124	n	3		ME	9.62104	9.80249	9.76193	8.87074	9.14759	9.00359	8.91721	9.16062	9.12896	7.0099	8.35191	8.31158
ENSMUSG00000010136	0.0664728	0.172519	0.786555	0.425093	0.391446	0.633601	n	3		ME	10.7012	10.6961	10.6832	10.7737	10.8877	10.7954	10.8087	10.8136	10.6961	10.5441	10.7922	10.8267
ENSMUSG00000010538	0.330877	0.364049	0.741414	0.221384	0.596084	0.305225	n	3		ME	11.7829	11.7374	11.8278	11.7931	11.8798	11.8013	11.5837	11.8408	11.6539	11.727	11.8408	11.8278
ENSMUSG00000025757	0.326099	0.0253039	0.995389	0.0429539	0.397417	0.0399644	y	3	higher	ME	11.9029	11.9799	11.9444	11.9524	11.9737	11.9884	12.0342	12.0208	12.0859	11.888	11.9693	11.9693
ENSMUSG00000025758	0.366503	0.586076	0.677995	0.249337	0.553067	0.410675	n	3		ME	8.47036	8.56006	8.59773	8.41487	8.46741	8.56691	8.49712	8.55863	8.70055	8.57539	8.52785	8.4561
ENSMUSG00000027528	0.162322	0.55571	0.273215	0.228799	0.71757	0.356662	n	3		ME	12.8384	12.9266	12.9567	12.7685	12.8914	12.7984	12.8632	12.8914	12.8914	12.6187	12.8384	12.8914
ENSMUSG00000027550	0.814547	0.00446371	0.000596743	0.0314139	0.00258115	0.0058478	y	3	intermediate	ME	10.3124	10.3371	10.3018	10.3263	10.3566	10.286	10.4187	10.386	10.4238	10.5315	10.4838	10.5174
ENSMUSG00000027630	0.03045	0.00436135	0.536354	5.92352e-05	0.133857	0.118542	y	3	lower	ME	6.98637	6.91392	6.91789	7.0335	7.02463	7.06599	6.75149	6.70983	6.73274	6.88875	6.78567	7.0016
ENSMUSG00000027676	0.49724	0.48243	0.588014	0.89373	0.90757	0.825572	n	3		ME	8.92801	9.58083	9.63505	8.87238	9.39417	9.25319	8.6877	9.30776	9.40656	8.81182	9.38702	9.4142
ENSMUSG00000027680	0.170064	0.291097	0.156044	0.080197	0.456491	0.100306	n	3		ME	12.0859	12.0978	12.0745	12.1666	12.1042	12.249	12.0587	12.0041	12.0896	12.249	12.1171	12.3617
ENSMUSG00000027702	0.709096	0.557737	0.149559	0.320883	0.0798704	0.22828	n	3		ME	11.3917	11.6608	11.6362	11.3571	11.6031	11.5877	11.5118	11.6608	11.7211	11.6336	11.8013	11.8323
ENSMUSG00000027719	0.390906	0.921319	0.888624	0.44805	0.431097	0.830283	n	3		ME	11.5672	11.7504	11.732	11.4918	11.6846	11.6362	11.5615	11.6948	11.7667	11.525	11.8225	11.7504
ENSMUSG00000027722	0.132668	0.0529355	0.0608684	0.304474	0.279561	0.863687	n	3		ME	8.72557	8.92758	8.93283	8.91283	9.1381	9.07637	9.028	9.16191	9.33528	9.01153	9.22233	9.36614
ENSMUSG00000027742	0.449145	0.729232	0.0617397	0.967293	0.106485	0.298249	n	3		ME	10.7277	10.7873	10.7119	10.7655	10.7415	10.7887	10.6682	10.7522	10.8842	10.9059	10.7887	10.8791
ENSMUSG00000027751	0.502716	0.660793	0.504826	0.302818	0.889747	0.298338	n	3		ME	10.7163	10.9133	10.8508	10.6799	10.7673	10.8607	10.761	10.859	10.9838	10.7851	10.8201	10.7292
ENSMUSG00000027778	0.201219	0.610942	0.107495	0.463015	0.372243	0.199709	n	3		ME	8.98468	9.24835	9.29018	8.88041	9.11915	8.97151	8.90782	9.27736	9.10093	8.5888	8.96305	8.97028
ENSMUSG00000027793	0.00211864	0.00231548	0.118918	0.619426	0.116882	0.158239	n	3		ME	10.5257	10.4708	10.3752	10.0591	9.9208	10.0538	9.97342	10.1117	10.0459	10.3991	10.0848	10.2214
ENSMUSG00000027811	0.783163	0.927205	0.161622	0.737361	0.142836	0.201711	n	3		ME	10.0484	10.2186	10.2569	10.0848	10.1234	10.2446	10.2094	10.0378	10.3064	9.99919	10.018	10.1066
ENSMUSG00000027827	0.000817135	0.00335655	0.597348	0.000115556	0.000940028	0.00390152	y	3	intermediate	ME	6.89349	7.11237	7.14821	5.09173	5.17204	5.1359	5.79625	5.82322	5.78038	6.8521	7.1317	6.97517
ENSMUSG00000027880	0.0297028	0.0569421	0.0211724	0.341266	0.540456	0.217527	n	3		ME	8.08986	8.04676	7.99269	7.70444	7.89148	7.7162	7.46746	7.84099	7.57908	7.73773	7.8324	7.89506
ENSMUSG00000027959	0.0546961	0.029529	0.398521	0.179953	0.306126	0.0678096	n	3		ME	7.58718	7.62945	7.69106	7.26242	7.48496	7.44115	7.04028	7.30448	7.29886	7.40552	7.4798	7.71853
ENSMUSG00000027968	0.136475	0.178603	0.134221	0.906833	0.682422	0.795086	n	3		ME	11.0853	11.2892	11.2435	10.9157	10.8791	11.1754	10.9633	10.8607	11.1971	11.1391	10.9221	11.0593
ENSMUSG00000027973	0.845619	0.80812	0.216951	0.557025	0.142641	0.246257	n	3		ME	9.993	10.3141	10.2522	10.1794	10.2233	10.2222	9.99919	10.2222	10.2401	9.79371	10.0885	10.0736
ENSMUSG00000027985	0.0818402	0.0100501	0.026206	0.0101263	0.0480684	0.405088	y	3	lower	ME	8.48801	8.50527	8.49008	8.30466	8.29286	8.43715	8.01009	8.13363	7.97747	8.03914	8.06434	8.24122
ENSMUSG00000028089	0.214762	0.360642	0.0150826	0.500726	0.268599	0.0574487	n	3		ME	9.73827	9.80484	9.77791	9.98812	10.0305	9.75576	9.92469	9.88907	9.72494	9.97962	10.0476	10.1396
ENSMUSG00000028134	0.247803	0.0583704	0.421782	0.193295	0.874729	0.267463	n	3		ME	10.2287	10.5441	10.496	10.4543	10.7046	10.6132	10.61	10.7873	10.894	10.316	10.6832	10.6987
ENSMUSG00000028145	0.70778	0.539035	0.961187	0.738021	0.765348	0.59114	n	3		ME	6.97363	7.25381	7.21185	6.85144	7.29162	7.1077	6.63166	7.26358	7.10684	6.81702	7.17988	7.47579
ENSMUSG00000028188	0.312684	0.209936	0.104941	0.578486	0.339092	0.746802	n	3		ME	11.1701	11.3177	11.3188	11.2487	11.4093	11.3953	11.2587	11.4608	11.4998	11.3153	11.525	11.4812
ENSMUSG00000033147	0.079771	0.0207107	0.533529	0.0880521	0.0245106	0.0187919	n	3		ME	7.52613	7.47657	7.33735	7.25161	7.30307	7.25777	6.91125	7.16656	6.85682	7.57971	7.43354	7.47339
ENSMUSG00000034349	0.0559342	0.000550621	0.0140548	0.0939689	0.524481	0.00419956	n	3		ME	11.0008	11.0622	11.093	11.1544	11.2587	11.3595	11.3754	11.4398	11.4504	11.1666	11.206	11.2587
ENSMUSG00000037062	0.0977432	0.603979	0.0832138	0.312647	0.341544	0.126494	n	3		ME	12.4665	12.5277	12.4547	12.3617	12.2891	12.4424	12.4111	12.3738	12.5576	12.4111	12.1864	12.2218
ENSMUSG00000037291	0.286454	0.475451	0.617417	0.754793	0.79212	0.957305	n	3		ME	7.16483	6.51196	6.33574	7.15082	6.83058	7.11749	7.40233	6.60555	6.82296	7.52054	7.00388	6.22967
ENSMUSG00000037325	0.0637331	0.0620519	0.217223	0.227074	0.869367	0.423523	n	3		ME	9.34124	9.36111	9.37505	9.11547	9.20807	9.27025	8.92001	9.07196	9.1936	9.00769	9.16457	9.36111
ENSMUSG00000037531	0.0105894	0.0353048	0.000499429	0.949175	0.0194052	0.0499811	n	3		ME	10.3439	10.4278	10.4246	10.6197	10.75	10.7857	10.5738	10.75	10.8136	10.8926	10.991	11.0213
ENSMUSG00000037661	0.0677852	0.0938396	0.0029661	0.491372	0.0802125	0.0239375	n	3		ME	10.6052	10.6147	10.5738	10.6699	10.8313	10.7833	10.6339	10.7673	10.7404	10.8644	10.9555	10.8842
ENSMUSG00000037814	0.969143	0.761603	0.851465	0.87275	0.855905	0.738081	n	3		ME	11.4166	11.4673	11.4418	11.4418	11.3312	11.5615	11.4829	11.3667	11.5272	11.5096	11.2609	11.5027
ENSMUSG00000037910	0.183919	0.146316	0.450753	0.711466	0.472277	0.322304	n	3		ME	11.8978	12.0041	11.9524	11.8133	11.9524	11.7864	11.7545	11.9396	11.7634	11.8154	11.9604	11.9396
ENSMUSG00000039335	0.00128424	0.0203141	0.000708863	0.64844	0.00215036	0.00226662	n	3		ME	10.2275	10.2986	10.3508	9.7143	9.85048	9.84685	9.68706	9.94952	9.91697	8.99652	9.01428	9.22043
ENSMUSG00000039831	0.728808	0.728847	0.224798	0.938051	0.628607	0.447016	n	3		ME	10.3885	10.5562	10.5651	10.2978	10.4406	10.6409	10.3976	10.4045	10.6074	10.3401	10.3925	10.472
ENSMUSG00000040412	0.455299	0.459792	0.166064	0.139175	0.269967	0.0928309	n	3		ME	10.1002	9.77639	9.7143	10.0906	9.90375	9.93913	9.76339	9.90243	9.52727	10.0033	10.1604	10.6621
ENSMUSG00000043020	0.259815	0.132606	0.102141	0.269449	0.124716	0.174901	n	3		ME	9.39743	9.57281	9.57904	9.33202	9.489	9.42961	8.98703	9.36897	9.34124	8.88187	8.89652	7.85471
ENSMUSG00000047674	0.0953409	0.0927284	0.0978305	0.924734	0.973352	0.9583	n	3		ME	10.9095	11.088	11.1305	11.1186	11.3098	11.3011	11.2098	11.2216	11.2775	11.1245	11.3348	11.2609
ENSMUSG00000050150	0.108299	0.141758	0.75833	0.96526	0.0285781	0.0803629	n	3		ME	10.4896	10.6175	10.5639	10.4385	10.4921	10.4543	10.4153	10.5358	10.4278	10.5685	10.6175	10.5298
ENSMUSG00000050549	0.975643	0.0616003	0.772725	0.0775472	0.798619	0.224553	n	3		ME	8.47249	8.54698	8.57993	8.51455	8.62115	8.46911	8.68351	8.61187	8.77942	8.43507	8.54776	8.69472
ENSMUSG00000053192	0.0134547	0.00421941	0.00202249	0.378479	0.0535381	0.0975564	n	3		ME	9.49356	9.70854	9.67234	9.93013	10.195	10.1794	10.0659	10.2872	10.2886	10.3581	10.4129	10.4708
ENSMUSG00000053897	0.1096	0.156889	0.00100478	0.783024	0.00361101	0.00298878	n	3		ME	8.05202	8.20297	8.20698	7.84573	8.07243	8.01121	7.87132	8.08807	8.05435	7.28761	7.41319	7.50984
ENSMUSG00000058388	0.124145	0.236036	0.439481	0.500696	0.732793	0.897011	n	3		ME	9.93509	9.98562	10.0156	9.92469	9.94784	9.89201	9.72871	9.9093	9.9559	9.76339	9.79895	10.0826
ENSMUSG00000068860	0.0491372	0.0429066	0.0154027	0.671007	0.463934	0.825774	n	3		ME	11.9604	11.8366	11.797	11.7603	11.5639	11.6263	11.7374	11.5837	11.5068	11.6723	11.5118	11.5854
ENSMUSG00000068922	0.513496	0.590009	0.0670609	0.974283	0.0584962	0.118578	n	3		ME	9.62011	9.43001	9.37404	9.43726	9.48308	9.30509	9.48949	9.48949	9.25622	9.22767	9.18564	9.2171
ENSMUSG00000068923	0.0473616	0.000297605	0.0206516	0.275411	0.0502535	0.124593	n	3		ME	7.75274	7.68017	7.68017	7.2354	6.85031	7.28245	6.95804	6.83953	6.96506	6.81806	6.33622	6.18995
ENSMUSG00000069041	0.248662	0.0863559	0.357785	0.31987	0.660643	0.184133	n	3		ME	9.64568	10.0411	10.1184	9.9665	10.3342	10.2595	10.1441	10.4057	10.6117	9.93797	10.2013	10.2158
ENSMUSG00000000001	0.562059	0.376653	0.522899	0.2125	0.857103	0.254327	n	3			8.37751	8.64638	8.66621	8.30153	8.69854	8.40214	8.54188	8.69129	8.82933	8.11129	8.51361	8.65984
ENSMUSG00000000339	0.0270087	0.396221	0.0281354	0.154708	0.225274	0.0540726	n	3			9.78738	9.72364	9.81002	9.67666	9.66198	9.58376	9.72927	9.79575	9.65931	9.48443	9.53598	9.64892
ENSMUSG00000000563	0.0120228	0.00435384	0.0932569	0.117133	0.0483654	0.0188147	n	3			10.6004	10.7673	10.7814	10.9584	11.0853	11.1245	11.1245	11.1938	11.3394	10.8183	10.9015	10.9074
ENSMUSG00000001016	0.00535717	0.00777824	0.00936264	0.231959	0.120945	0.524988	n	3			7.5193	7.55335	7.4855	8.09196	8.19428	8.31544	8.18609	8.40661	8.46698	8.27444	8.43972	8.62031
ENSMUSG00000001018	0.000492561	0.000888718	0.0101053	0.187224	0.025096	0.0707073	n	3			8.19379	8.15998	8.0902	7.68066	7.76326	7.70689	7.75193	7.83268	7.74466	7.87132	7.85309	7.98283
ENSMUSG00000001052	0.227815	0.0265068	0.361404	0.213482	0.455766	0.576232	n	3			8.88187	8.55647	8.61267	8.54972	8.20244	8.60497	8.39228	8.09417	8.17184	8.64794	8.39881	5.80337
ENSMUSG00000001415	0.643778	0.500894	0.377396	0.9265	0.501124	0.511041	n	3			9.75355	9.46844	9.50423	9.68932	9.37312	9.46964	9.56377	9.4917	9.44622	9.65574	9.40952	8.92223
ENSMUSG00000001416	0.00698798	0.188694	0.00456354	0.0228535	0.685483	0.0268037	y	3	intermediate		11.4251	11.4368	11.3647	11.1701	11.2154	11.093	11.2709	11.3629	11.3867	11.2336	11.1754	11.1305
ENSMUSG00000002428	0.121781	0.0180582	0.0609841	0.701807	0.377783	0.473305	n	3			6.14852	5.93564	6.06304	6.20463	6.54829	6.21309	6.35398	6.28926	6.48323	6.23233	6.58932	6.66738
ENSMUSG00000003617	0.0110782	0.119623	0.00203656	0.350353	0.0524182	0.0435905	n	3			5.53196	5.55556	5.68538	5.23584	5.09461	5.31299	5.50142	5.15483	5.37619	4.83778	5.03106	5.03106
ENSMUSG00000004233	0.090149	0.0285072	0.0357942	0.0838361	0.00390591	0.0123923	n	3			5.64211	5.7761	5.75982	5.529	5.64034	5.63483	5.51094	5.36367	5.2341	5.93138	5.92917	5.83121
ENSMUSG00000004591	0.100384	0.63214	0.222819	0.121377	0.0669796	0.358066	n	3			8.78946	8.80692	8.78749	8.85412	8.83615	8.92661	8.77262	8.69993	8.84212	8.70258	8.60548	8.79307
ENSMUSG00000004897	0.593295	0.416406	0.143483	0.962348	0.515734	0.444871	n	3			10.2126	9.85217	9.87976	10.1701	8.91533	10.0826	10.0327	9.15746	9.90375	9.90612	8.99463	9.20901
ENSMUSG00000005625	0.197738	0.00834631	0.388416	0.182513	0.174378	0.0905387	n	3			10.2553	10.2214	10.2	10.3439	10.4187	10.2263	10.4554	10.4817	10.3796	10.2027	10.2263	9.86768
ENSMUSG00000005687	0.357302	0.366007	0.879708	0.872648	0.312645	0.324712	n	3			9.02888	9.19187	9.31818	9.2282	9.41362	9.22587	9.2288	9.27632	9.3266	8.99597	9.17319	9.30996
ENSMUSG00000005774	0.157781	0.0185826	0.00857224	0.678055	0.0209035	0.0178545	n	3			6.75384	6.665	6.66621	7.0735	6.93108	6.72647	6.9231	7.06523	6.89848	7.29162	7.35331	7.57581
ENSMUSG00000005779	0.459473	0.00251533	0.433733	0.0363354	0.229746	0.0063764	y	3	higher		10.2461	10.3622	10.3278	10.3955	10.4613	10.2553	10.5685	10.658	10.6442	10.163	10.2907	10.324
ENSMUSG00000005813	0.0308557	0.214887	0.0819052	0.970843	0.228711	0.561909	n	3			8.21197	8.36363	8.2584	8.43363	8.49063	8.61979	8.25602	8.57235	8.69854	8.46531	8.44623	8.33872
ENSMUSG00000005968	0.0102884	0.00970183	0.000949026	0.180076	0.220044	0.594762	n	3			8.42652	8.45291	8.37041	7.7949	7.76142	7.51384	7.39027	7.67382	7.32148	7.47771	7.48197	7.64079
ENSMUSG00000008604	0.173489	0.118252	0.0194955	0.806303	0.0773818	0.0987682	n	3			7.203	6.9929	6.96242	6.99023	6.44143	6.771	6.98283	6.54562	6.50003	6.51795	6.07474	6.00222
ENSMUSG00000014601	0.422509	0.952473	0.339842	0.47806	0.821496	0.389928	n	3			7.36011	7.34499	7.21947	7.47837	7.31058	7.32362	7.29556	7.42346	7.19001	7.27454	7.41883	7.47771
ENSMUSG00000015522	0.0750837	0.186196	0.00613154	0.412089	0.0011396	0.0474365	n	3			5.59874	5.68187	5.58129	5.56932	5.50532	5.50532	5.60558	5.24464	5.40727	5.89802	5.8261	5.80598
ENSMUSG00000015702	0.00108587	0.00484864	0.0547453	0.106669	0.290662	0.169611	n	3			6.13324	6.19174	6.18269	5.77085	5.78852	5.78394	5.83513	5.84981	5.94572	5.29292	5.60558	5.80672
ENSMUSG00000015745	0.324254	0.189532	0.0724928	0.979635	0.232437	0.186945	n	3			6.47622	6.29386	6.2643	6.18444	5.9231	6.3913	6.28095	6.23057	6.00055	6.15465	5.85214	5.64211
ENSMUSG00000015748	0.123383	0.297989	0.025437	0.832107	0.0468699	0.0485823	n	3			7.91898	7.80011	7.84621	7.97747	7.96366	7.88725	7.923	8.10894	7.85363	8.14576	8.27348	8.44584
ENSMUSG00000015943	0.017768	0.0243385	0.00176049	0.24814	0.0656607	0.717629	n	3			9.21098	8.9184	8.98567	8.5607	8.53943	8.19149	8.29227	8.32311	7.74139	7.83956	8.16977	8.09292
ENSMUSG00000019338	0.327167	0.594421	0.644387	0.595345	0.519043	0.587186	n	3			8.06084	7.82591	7.83268	8.26847	7.8115	8.20698	8.16497	7.76647	8.03453	8.45497	8.0681	5.92246
ENSMUSG00000019710	0.0606004	0.182684	0.0541501	0.0203957	0.529403	0.0164291	y	3	higher		10.6799	10.7476	10.7163	10.5402	10.6511	10.5032	10.7217	10.8827	10.8099	10.4153	10.6012	10.5328
ENSMUSG00000023087	0.169578	0.862936	0.0726154	0.27934	0.430859	0.132193	n	3			8.02613	8.1431	8.16921	7.74139	7.76049	8.10894	7.897	8.04795	8.50191	7.76818	7.48622	7.90542
ENSMUSG00000025759	0.00383125	0.0220373	0.0128416	0.472639	0.0284705	0.0276746	n	3			5.00657	5.05047	5.0873	5.58704	5.73049	5.54764	5.5132	5.76807	5.88953	6.19817	6.43501	6.78635
ENSMUSG00000027534	0.284967	0.465808	0.387327	0.127159	0.836567	0.260452	n	3			5.9109	5.75258	5.65167	5.71438	5.42978	5.71741	5.87265	5.91422	5.74971	5.68737	5.2319	5.80796
ENSMUSG00000027552	0.523582	0.552318	0.267521	0.967353	0.496999	0.483992	n	3			7.97033	8.23712	8.36363	7.95008	8.05746	8.2552	7.96139	8.04269	8.27562	7.76854	7.96281	8.19017
ENSMUSG00000027663	0.391858	0.210174	0.011247	0.42508	0.0056633	0.072611	n	3			6.39574	6.6326	6.34965	6.46482	6.68263	6.54562	6.44272	6.85254	6.7939	7.074	7.1392	7.16483
ENSMUSG00000027667	0.0504885	0.454936	0.0416707	0.0399426	0.140863	0.0181598	y	3	higher		9.21664	9.16626	9.15802	9.09148	9.03053	8.9425	9.12464	9.27253	9.2915	8.72761	8.84815	8.98567
ENSMUSG00000027668	0.219954	0.0645833	0.051256	0.57728	0.0699228	0.0664623	n	3			8.52588	8.5321	8.51933	8.56691	8.63136	8.5321	8.54776	8.5761	8.54776	8.64586	8.70806	8.80398
ENSMUSG00000027669	0.2924	0.677861	0.0348519	0.362098	0.0781261	0.0579051	n	3			4.9317	4.87737	5.12219	4.94975	5.15483	5.24464	4.9643	5.05441	5.02303	5.50913	5.26904	5.7099
ENSMUSG00000027671	0.463152	0.653497	0.0689461	0.743437	0.186836	0.1059	n	3			9.57028	9.92907	9.88778	9.69857	10.0002	10.0848	9.67056	9.90112	10.0436	10.0411	10.206	10.2094
ENSMUSG00000027673	0.0731288	0.501979	0.219582	0.445041	0.791069	0.444629	n	3			11.0429	11.1147	11.1231	11.1305	11.1971	11.2132	11.1211	11.2204	11.0602	11.0947	11.1971	11.3073
ENSMUSG00000027677	0.00820651	0.297259	0.566031	0.116191	0.0316579	0.198719	n	3			5.29292	5.2119	5.13161	4.9317	4.9317	4.84525	5.05441	4.99161	5.2517	5.12573	5.28773	5.3989
ENSMUSG00000027699	0.866938	0.763371	0.354801	0.862387	0.354057	0.534096	n	3			8.01763	8.39743	8.5855	8.12169	8.50527	8.48586	8.11449	8.42133	8.69322	8.31779	8.6768	8.65391
ENSMUSG00000027770	0.376784	0.0414138	0.868594	0.470335	0.910034	0.744945	n	3			8.47631	8.46156	8.40895	8.4295	8.56441	8.48952	8.51843	8.52072	8.54838	8.60268	8.63404	8.19083
ENSMUSG00000027774	0.00224568	0.00552766	0.151738	0.227591	0.0263911	0.0107893	n	3			7.79358	7.75356	7.75765	8.0538	8.1498	8.0968	8.09126	8.2105	8.20945	7.79143	7.87652	7.96213
ENSMUSG00000027787	0.641559	0.180005	0.404509	0.398836	0.734973	0.590692	n	3			8.81944	9.05465	9.08361	8.82487	9.16878	9.18279	8.99986	9.27402	9.35108	8.91434	9.13579	9.3032
ENSMUSG00000027799	0.387011	0.0367543	0.0292719	0.0786162	0.057964	0.778849	n	3			7.58203	7.21477	7.29556	7.57122	7.63323	7.31782	7.97491	7.74591	7.70689	7.79634	7.73225	8.00483
ENSMUSG00000027805	0.087552	0.0381453	0.0137453	0.304339	0.0294611	0.204509	n	3			10.4802	10.6593	10.6431	10.7012	10.8136	10.75	10.798	10.7579	10.9157	10.8494	10.924	10.9706
ENSMUSG00000027806	0.289074	0.477797	0.549352	0.814403	0.505901	0.734519	n	3			7.94255	8.07856	8.01193	7.73552	7.98792	7.96281	7.77195	7.90899	8.09889	7.89614	7.93175	8.07315
ENSMUSG00000027808	0.00350843	0.00434459	0.00666908	0.365245	0.177631	0.509477	n	3			11.5701	11.4974	11.4673	11.8225	11.8323	11.727	11.7029	11.7931	11.7545	11.7603	11.6723	11.7374
ENSMUSG00000027810	0.479849	0.624485	0.518617	0.301774	0.750796	0.376299	n	3			6.29688	6.35454	6.57916	6.18583	6.40827	6.37694	6.27835	6.51105	6.66858	5.90762	6.22967	6.6064
ENSMUSG00000027822	0.489792	0.419486	0.393202	0.812817	0.686296	0.838884	n	3			6.15127	6.61095	6.66809	6.40623	6.88368	6.62937	6.33128	6.89258	6.87048	6.28334	6.91125	7.10111
ENSMUSG00000027829	0.0104345	0.711534	0.147362	0.0708	0.00356115	0.191165	n	3			8.88763	8.82618	8.74082	8.58229	8.5253	8.51232	8.82487	8.64036	8.88603	8.85461	8.92155	8.99652
ENSMUSG00000027845	0.0755238	0.209719	0.0793494	0.910034	0.0357285	0.0275698	n	3			4.69098	4.79488	4.84525	4.59205	4.57551	4.71336	4.48045	4.78773	4.57551	4.89626	5.18059	5.26904
ENSMUSG00000027852	0.923488	0.0660781	0.802311	0.131885	0.922661	0.077941	n	3			9.05689	9.01919	8.96069	8.92885	9.06468	9.028	8.89776	8.96626	8.86647	9.0514	8.96872	8.98644
ENSMUSG00000027854	0.0369897	0.00497992	0.348094	0.00874025	0.339737	0.0720269	y	3	higher		6.60888	6.68651	6.78782	6.93276	6.95465	6.90589	7.07213	7.13059	7.1672	6.96242	6.84039	6.63771
ENSMUSG00000027875	0.0323578	0.0207631	0.0422224	0.0889235	0.617476	0.0451978	n	3			7.57908	7.96807	7.88132	8.37751	8.36674	8.18432	8.4478	8.44508	8.56167	8.25943	8.15912	8.3687
ENSMUSG00000027883	0.118358	0.0224519	0.388466	0.282254	0.0951101	0.0456129	n	3			7.81314	7.87595	7.8169	7.62906	7.78665	7.53665	7.55615	7.62018	7.43031	7.73445	8.04795	8.09462
ENSMUSG00000027884	0.397319	0.598883	0.863319	0.947148	0.902431	0.881721	n	3			5.97155	5.94682	6.11441	5.99073	6.13209	6.10317	5.86466	6.23641	6.15127	5.72147	6.04673	6.37785
ENSMUSG00000027893	0.0805858	0.130833	0.481714	0.819278	0.252774	0.267179	n	3			8.59113	8.7498	8.6877	8.77942	8.783	8.87179	8.85052	8.70913	8.83471	8.78258	8.60744	8.15121
ENSMUSG00000027933	0.0875504	0.0377393	0.000149474	0.467549	0.0180736	0.0222253	n	3			6.46268	6.43687	6.38504	6.82017	6.52287	6.73688	6.80722	6.64201	6.91859	7.1744	7.15904	7.27149
ENSMUSG00000027935	0.0471551	0.0315214	0.0151501	0.449767	0.109955	0.197168	n	3			6.81471	6.95386	6.65508	7.03647	7.24051	7.08764	7.26774	7.13972	7.14591	7.36964	7.19966	7.28407
ENSMUSG00000027936	0.830857	0.925817	0.554001	0.793224	0.756559	0.535124	n	3			5.7745	5.54764	5.38315	5.91472	5.1359	5.84706	5.85716	5.36086	5.42978	6.18367	5.71996	5.3411
ENSMUSG00000027953	0.103555	0.175654	0.139716	0.380285	0.648974	0.324728	n	3			6.58484	6.42148	6.61933	6.71892	6.90869	6.64129	6.68829	6.59019	6.71704	7.02132	6.88875	6.58555
ENSMUSG00000027957	0.0713647	0.0660634	0.00576109	0.280866	0.769628	0.323069	n	3			6.52179	6.5382	6.53158	6.13209	6.36403	6.33052	5.89802	6.30359	6.09445	6.20339	6.28238	6.26603
ENSMUSG00000027963	0.391204	0.0463085	0.0522613	0.167512	0.0592576	0.00817049	n	3			7.61786	7.56454	7.52495	7.46244	7.62906	7.34924	7.25229	7.43617	7.20879	7.6844	7.71306	7.85059
ENSMUSG00000027981	0.782953	0.653166	0.334971	0.506021	0.223176	0.741872	n	3			6.32869	6.78471	6.81143	6.29386	6.62067	6.81702	6.3898	6.79147	7.13293	6.63166	6.90723	7.04107
ENSMUSG00000027998	0.161734	0.162806	0.110107	0.941509	0.505782	0.554108	n	3			8.79802	8.84919	8.84986	8.91373	9.13579	8.91652	8.84751	9.10822	9.03538	8.89652	9.13744	9.1872
ENSMUSG00000027999	0.00612317	0.00270534	0.00262157	0.246117	0.015246	0.0298818	n	3			9.19449	9.028	9.00605	9.65198	9.58283	9.42655	9.71353	9.78209	9.55316	10.0538	10.0167	10.0583
ENSMUSG00000028003	0.744248	0.613761	0.990662	0.220643	0.669485	0.441399	n	3			5.18059	4.59205	4.59205	4.85401	4.48045	4.78773	4.95399	4.81333	4.94975	4.83037	4.55118	4.97436
ENSMUSG00000028010	0.136255	0.0145166	0.0348532	0.097738	0.176809	0.807771	n	3			9.18124	9.20558	9.10164	9.27025	9.32575	9.18508	9.4657	9.33253	9.35665	9.4657	9.34222	9.29602
ENSMUSG00000028013	0.0185202	0.0297658	0.0746787	0.845361	0.636516	0.741292	n	3			9.43818	9.55467	9.489	9.69949	9.87621	9.90112	9.69245	9.93375	9.91316	9.66285	9.9463	10.0885
ENSMUSG00000028016	0.316295	0.0974353	0.0621944	0.034463	0.139919	0.0155174	y	3	lower		7.69367	7.80169	7.90318	7.7984	8.01069	7.88586	7.44647	7.67155	7.66017	7.92877	8.19263	8.2584
ENSMUSG00000028018	0.0926077	0.335459	0.0506476	0.476425	0.0221058	0.0254626	n	3			6.06745	5.97546	5.86099	5.88731	5.7745	5.73623	5.73623	5.88384	5.9791	6.12744	6.43545	6.44377
ENSMUSG00000028023	0.000770238	8.46761e-05	0.0248699	0.00205459	0.0721725	0.251731	y	3	intermediate		6.98741	6.89258	7.01207	6.43967	6.56072	6.4912	6.14152	6.20956	6.09094	5.45737	6.04843	6.0206
ENSMUSG00000028034	0.0762987	0.00285483	0.406276	0.0199553	0.35176	0.0134655	y	3	higher		8.32028	8.46698	8.44293	8.52072	8.71362	8.54776	8.81593	8.88857	9.01	8.37586	8.47179	8.63058
ENSMUSG00000028035	0.0337414	0.0808809	0.0124699	0.141758	0.0230918	0.570461	n	3			10.6645	10.6729	10.6531	10.6873	10.6799	10.6987	10.7673	10.7012	10.8002	10.761	10.761	10.8099
ENSMUSG00000028047	0.188063	0.818913	0.416921	0.206957	0.162937	0.393252	n	3			7.02725	6.96771	6.9106	6.94358	6.58484	6.7817	6.89434	6.95892	7.01652	7.28129	7.40233	6.79147
ENSMUSG00000028049	0.907172	0.998821	0.360581	0.91846	0.515611	0.444177	n	3			8.27486	7.93777	7.86058	8.44228	7.84888	7.86946	8.36973	7.98032	7.72208	8.5321	8.13099	8.02954
ENSMUSG00000028053	0.90612	0.879138	0.789129	0.97111	0.870587	0.897783	n	3			7.03045	6.77926	6.64872	6.98952	6.88926	6.63743	6.99167	6.63838	6.9034	7.08702	6.83795	6.6743
ENSMUSG00000028057	0.179761	0.5734	0.113411	0.0670663	0.442126	0.0730806	n	3			7.88187	7.79228	7.72721	7.84525	7.87284	7.97971	7.78953	7.80722	7.70202	7.94681	7.86421	8.08807
ENSMUSG00000028062	0.920786	0.728372	0.0412297	0.72932	0.0520484	0.0540846	n	3			7.55841	7.54445	7.66786	7.59592	7.70588	7.49236	7.61748	7.51861	7.58009	7.48245	7.30448	7.30172
ENSMUSG00000028070	0.529533	0.10894	0.135439	0.0665403	0.0875672	0.991961	n	3			8.9528	9.01329	8.99165	8.98993	9.11177	8.96264	8.70867	8.93689	8.73546	8.63737	8.84368	8.90346
ENSMUSG00000028082	0.832824	0.586135	0.0553976	0.53375	0.0434556	0.206162	n	3			6.14689	6.01499	6.14689	6.04988	6.06304	6.15811	6.25675	5.93564	6.37568	5.94864	5.89396	6.01009
ENSMUSG00000028085	0.0371638	0.704417	0.837392	0.0625069	0.258451	0.661695	n	3			6.58177	6.37785	6.3657	6.70687	6.6577	6.79678	6.46067	6.51717	6.19904	6.48043	6.21104	6.7489
ENSMUSG00000028086	0.0819832	0.135539	0.0176248	0.905871	0.28367	0.287888	n	3			8.27299	8.36294	8.3458	8.09417	8.01956	8.25371	8.18041	7.97631	8.25143	8.07025	7.89506	8.06638
ENSMUSG00000028096	0.00940242	0.140635	0.0306284	0.622342	0.204522	0.190411	n	3			7.70588	7.70529	7.68858	7.97095	7.98719	7.89773	7.80343	8.07129	7.83045	7.93907	8.13789	8.14819
ENSMUSG00000028099	0.083538	0.00922322	0.187032	0.0861781	0.278808	0.427459	n	3			8.39582	8.36189	8.41122	8.19329	8.12657	8.3216	7.96281	8.09731	8.08359	8.04829	8.05563	7.01076
ENSMUSG00000028104	0.00231442	0.010725	0.185173	0.954519	0.805548	0.820505	n	3			7.54397	7.58884	7.64203	7.1736	7.29703	7.26708	7.32027	7.26844	7.13688	7.18634	7.54324	6.83461
ENSMUSG00000028106	0.325904	0.709916	0.264468	0.264355	0.55887	0.197999	n	3			6.95725	6.78567	6.771	6.93616	6.89009	6.91859	6.93276	6.67059	6.79448	7.13568	6.9222	6.86121
ENSMUSG00000028107	0.100902	0.0339931	0.00571051	0.831247	0.134221	0.0658507	n	3			7.1392	6.94185	7.00025	6.91323	6.84416	6.62224	6.77457	6.81206	6.72791	6.56019	6.51001	6.69752
ENSMUSG00000028114	0.536172	0.302933	0.824594	0.427395	0.988326	0.563899	n	3			6.36735	6.28095	6.40623	6.32184	6.5357	6.35512	6.2688	6.76986	6.62818	6.0817	6.36895	6.75206
ENSMUSG00000028121	0.475115	0.987374	0.356786	0.495927	0.657822	0.368785	n	3			7.18109	7.4051	7.50664	7.2156	7.38773	7.21947	7.27678	7.24605	7.57721	7.01207	7.27413	7.36162
ENSMUSG00000028124	0.984536	0.755521	0.932381	0.831831	0.93311	0.75687	n	3			8.58711	8.13878	8.11347	8.67617	7.68066	8.46109	8.57335	7.76915	8.21495	8.82487	7.81058	8.29531
ENSMUSG00000028133	0.000787756	0.00127306	0.00564788	0.121226	0.0854334	0.381809	n	3			3.93559	3.93559	4.14899	4.96908	5.18419	5.27606	5.20513	5.57431	5.54327	5.3411	5.66363	5.96441
ENSMUSG00000028136	0.0490257	0.900882	0.332542	0.117362	0.486736	0.349688	n	3			7.79634	7.68598	7.73171	7.85309	7.81259	7.91338	7.8147	7.74183	7.63256	7.83321	7.89238	7.70588
ENSMUSG00000028152	0.574059	0.197927	0.20954	0.525835	0.276517	0.378289	n	3			7.38557	7.48154	7.3458	7.41158	7.4198	7.26071	7.39348	7.29237	7.27196	7.32944	7.27454	6.91859
ENSMUSG00000028158	0.00302067	0.0104477	0.0023872	0.653386	0.181009	0.130771	n	3			7.07713	6.89577	6.94251	7.84621	7.94575	7.63823	7.81639	7.88725	7.51327	7.89178	7.97134	8.22461
ENSMUSG00000028161	0.0462016	0.0104071	0.000440246	0.95968	0.00466127	0.00183179	n	3			9.4458	9.2288	9.20156	9.03538	8.79013	8.5681	8.91777	8.83307	8.668	7.95314	7.59749	7.76049
ENSMUSG00000028163	0.420082	0.993132	0.0152054	0.438241	0.0344282	0.0159125	n	3			6.83883	6.78277	7.01498	6.94942	7.13972	6.84691	6.80657	7.03709	6.79	7.19428	7.46318	7.48965
ENSMUSG00000028182	0.933358	0.504511	0.757792	0.458605	0.823208	0.341932	n	3			9.65131	10.0476	10.169	9.66198	10.1548	10.1105	9.4917	9.89395	9.99919	9.72629	10.1664	10.1906
ENSMUSG00000028184	0.049457	0.161904	0.243544	0.560519	0.126375	0.398108	n	3			8.23849	8.31544	8.24059	7.95882	8.11129	8.13024	8.02004	8.25194	8.09505	8.22857	8.2474	8.12125
ENSMUSG00000028187	0.178269	0.174897	0.777699	0.734229	0.254576	0.202782	n	3			8.00748	8.13193	8.21359	7.82285	8.07129	7.99199	7.76749	8.10607	7.87652	7.95478	8.1444	8.38128
ENSMUSG00000028256	0.263419	0.605322	0.0615082	0.780275	0.0232843	0.0457821	n	3			6.61744	6.71892	6.73214	6.39574	6.51251	6.7226	6.30448	6.68735	6.80016	7.02836	7.06057	7.45556
ENSMUSG00000032913	0.637908	0.501366	0.00738249	0.197537	0.0117754	0.00855698	n	3			6.65412	6.53158	6.4676	6.55189	6.66562	6.53996	6.5138	6.5586	6.43287	6.95136	7.11385	7.2319
ENSMUSG00000032952	0.0187834	0.0140999	0.0526086	0.730904	0.503614	0.341264	n	3			8.60897	8.79013	8.68284	8.12575	8.32913	8.39789	8.08268	8.28622	8.35581	8.22983	8.34915	8.54479
ENSMUSG00000033014	0.640466	0.907933	0.238529	0.804389	0.208514	0.328666	n	3			7.97415	8.00041	8.01956	7.84789	8.12125	7.8842	7.81058	8.1444	8.00102	7.97169	8.20428	8.19263
ENSMUSG00000033308	0.418549	0.705132	0.431582	0.296076	0.206292	0.527489	n	3			4.57551	4.49741	4.77343	4.24067	4.67314	4.51732	4.59205	4.64564	4.72234	4.57551	4.67314	5.02753
ENSMUSG00000033400	0.0283297	0.374946	0.294974	0.778122	0.962696	0.85766	n	3			5.77926	5.84981	5.66603	5.59524	5.47967	5.52033	5.87669	5.32916	5.54489	5.80672	5.2517	5.56257
ENSMUSG00000033439	0.220394	0.61127	0.0236345	0.945045	0.0235148	0.0206039	n	3			5.47967	5.40138	5.44823	5.43661	5.53196	5.57431	5.31299	5.67048	5.53399	5.91631	5.98411	6.25675
ENSMUSG00000033554	0.013442	0.34811	0.021001	0.275009	0.106685	0.0546809	n	3			5.67292	5.6127	5.65977	5.89507	5.96676	5.82763	5.66818	5.9439	5.66818	6.04567	5.97792	6.21876
ENSMUSG00000034317	0.141111	0.268797	0.0514894	0.854891	0.725697	0.940462	n	3			8.07315	8.23849	8.28086	7.69486	7.74058	8.1605	7.76854	7.68017	8.28864	7.78665	7.97095	8.0299
ENSMUSG00000034544	0.0739478	0.395681	0.38394	0.37544	0.617151	0.825766	n	3			7.96704	8.08008	8.17184	7.69923	7.93847	7.89178	7.80103	7.95957	8.13099	7.70444	7.91762	8.15515
ENSMUSG00000036580	0.0689504	0.205191	0.141421	0.0620151	0.0280061	0.89818	n	3			7.77833	7.79292	7.76276	7.83268	7.84689	7.91898	7.76527	7.5608	7.68066	7.59393	7.72938	7.7135
ENSMUSG00000036873	0.280995	0.714295	0.230398	0.601106	0.122003	0.181701	n	3			8.80836	8.82854	8.7329	8.72104	8.71121	8.79241	8.68702	8.80189	8.8204	8.87772	8.79802	9.0182
ENSMUSG00000037072	0.72651	0.509946	0.13336	0.346244	0.176477	0.085098	n	3			9.84595	10.2313	10.2332	9.8189	10.1724	10.1274	9.93305	10.3581	10.4749	9.56775	9.85167	9.93013
ENSMUSG00000037152	0.207645	0.20849	0.703225	0.996472	0.0684206	0.070367	n	3			10.9706	11.0708	11.1971	11.1231	11.2745	11.206	11.1453	11.2902	11.1689	10.9948	11.0105	11.1351
ENSMUSG00000037174	0.841044	0.976671	0.918795	0.849572	0.913195	0.917138	n	3			9.63374	9.40216	9.1255	9.58942	8.95473	9.81002	9.81572	8.92063	9.39685	9.80484	9.2179	9.21868
ENSMUSG00000037270	0.280864	0.107849	0.425049	0.570436	0.935382	0.57841	n	3			9.04353	9.16671	9.26728	9.13024	9.55897	9.33744	9.22338	9.53252	9.57992	8.99846	9.47378	9.50115
ENSMUSG00000037730	0.450165	0.328081	0.755104	0.802298	0.700768	0.553621	n	3			6.29175	6.55086	6.59919	6.2264	6.50144	6.40014	6.22093	6.4598	6.36198	6.21876	6.57555	6.50228
ENSMUSG00000037818	0.112215	0.331571	0.0173437	0.456072	0.0578155	0.033445	n	3			5.05441	5.2341	5.31299	5.27191	5.50341	5.4654	5.17204	5.34883	5.45101	5.61467	5.78852	6.02239
ENSMUSG00000038170	6.35761e-05	0.000215238	4.13159e-05	0.0483007	2.34522e-05	0.000214216	y	3	intermediate		3.87157	3.87157	3.87157	7.78005	7.76647	7.8666	7.60384	7.70363	7.51384	8.86708	8.78049	8.76526
ENSMUSG00000038205	0.0500619	0.0161489	0.0402849	0.0152608	0.262139	0.00151354	y	3	lower		6.68589	6.44619	6.48601	6.30448	6.19407	6.32869	6.00934	6.01499	5.97435	6.19657	6.18886	6.25034
ENSMUSG00000038495	0.0616681	0.01194	0.00825085	0.0168272	0.326247	0.0173029	y	3	lower		7.76854	7.76444	7.77343	7.57263	7.69367	7.56731	7.30623	7.45588	7.35331	7.65966	7.68534	7.64788
ENSMUSG00000038619	0.205834	0.0557061	0.880717	0.134353	0.768111	0.282499	n	3			7.96467	8.05604	8.03416	8.08623	8.08167	8.03767	8.09196	8.25431	8.18947	7.8842	8.0029	8.21879
ENSMUSG00000038712	0.00818137	0.46155	0.0461944	0.245223	0.541305	0.164558	n	3			7.37322	7.47245	7.48965	7.178	7.2655	7.18932	7.2018	7.5223	7.35463	6.9978	7.24205	7.21861
ENSMUSG00000039047	0.0687163	0.019547	0.00978158	0.1534	0.0138233	0.0496424	n	3			8.00102	8.06481	8.26976	8.25	8.42652	8.42796	8.43363	8.48049	8.61904	8.6562	8.70414	8.76705
ENSMUSG00000039735	0.295973	0.000416105	0.0509556	0.00654255	0.0334166	0.012097	y	3	higher		7.68534	7.79634	7.74139	7.37115	7.79429	7.54371	8.58028	8.52785	8.70184	7.90318	8.12125	8.20072
ENSMUSG00000039756	0.10197	0.0650686	0.138147	0.961444	0.791081	0.811223	n	3			8.42209	8.52419	8.48453	8.53281	8.60966	8.72284	8.61741	8.54921	8.70985	8.54776	8.60151	8.79589
ENSMUSG00000039887	0.053094	0.477343	0.580167	0.08225	0.265822	0.938779	n	3			6.36993	6.22336	6.05718	6.51656	6.59398	6.58271	6.32797	6.44699	6.16295	6.0999	6.25675	6.62529
ENSMUSG00000040269	0.763507	0.629505	0.712877	0.840245	0.834924	0.937724	n	3			8.21547	8.3038	8.34986	8.15292	8.33872	8.30938	8.11347	8.29286	8.3369	8.04177	8.1985	8.46698
ENSMUSG00000040389	0.461359	0.922816	0.0686499	0.751977	0.0469663	0.0989429	n	3			7.01652	7.10456	7.0099	7.03759	7.06181	7.13465	6.9413	7.03418	7.1796	6.7334	6.90261	6.92488
ENSMUSG00000040809	0.103824	0.021167	0.0110014	0.0130124	0.036071	0.498505	y	3	intermediate		4.65969	3.72194	3.72194	4.69098	5.11545	4.76397	5.44637	5.92019	5.63814	5.42728	5.93962	6.29793
ENSMUSG00000041977	0.632601	0.791832	0.655889	0.574458	0.960161	0.575562	n	3			6.92265	6.72315	6.67008	6.95273	6.68829	6.84323	7.0158	6.55303	6.60402	6.98094	6.89349	6.63071
ENSMUSG00000042404	0.00496361	0.00120262	0.19345	0.0750341	0.010883	0.0138804	n	3			7.30765	7.28178	7.19617	6.87121	6.74591	6.92636	6.65876	6.66249	6.6981	7.33089	7.36067	7.63063
ENSMUSG00000042520	0.063571	0.0151551	0.00440204	0.0371463	0.0192593	0.676305	y	3	intermediate		8.76968	8.63136	8.67493	8.84815	8.87904	8.76248	9.00534	8.99534	8.97797	8.96928	8.98567	9.06941
ENSMUSG00000042572	0.281116	0.138737	0.590043	0.715571	0.661436	0.441668	n	3			8.97584	8.86985	8.8204	8.90427	8.61599	8.77436	8.868	8.65235	8.6438	8.98166	8.65235	8.84027
ENSMUSG00000042613	0.249977	0.927896	0.83573	0.296314	0.365348	0.908756	n	3			6.7226	6.45389	6.56845	6.63426	5.98691	6.2247	6.82967	6.50003	6.36895	6.87048	6.41547	6.33343
ENSMUSG00000042642	0.0133424	0.0703112	0.155656	0.300553	0.283312	0.826477	n	3			9.16355	9.06803	9.06537	8.91434	8.85602	8.75638	8.9528	9.00925	8.82251	9.04854	8.98644	8.81275
ENSMUSG00000042747	0.0213829	0.010652	0.00983194	0.212328	0.117268	0.517312	n	3			8.1431	7.92681	7.93818	8.39228	8.38038	8.24349	8.4946	8.60497	8.33756	8.43586	8.51519	8.74284
ENSMUSG00000043542	0.00545018	0.00642279	0.106591	0.597113	0.182821	0.120613	n	3			6.80722	6.72354	6.80342	6.25034	6.37484	6.42751	6.19174	6.33959	6.38593	6.35312	6.57916	6.66249
ENSMUSG00000044080	0.013685	0.0120674	0.0522837	0.210445	0.545164	0.684426	n	3			6.88437	7.02369	6.97246	6.57235	6.48043	6.70882	6.56663	6.43501	6.27342	6.45185	6.29865	6.72402
ENSMUSG00000044098	0.501419	0.888598	0.697394	0.51451	0.367021	0.860742	n	3			6.63519	6.89172	6.85102	6.5357	6.91252	6.61744	6.56985	6.83532	7.04497	6.63519	6.91667	6.99729
ENSMUSG00000045328	0.773758	0.26575	0.291006	0.310344	0.317088	0.590166	n	3			7.26844	6.97639	6.84173	7.14346	6.89577	6.90773	6.95725	6.19174	6.83883	7.21028	6.28095	5.50532
ENSMUSG00000045576	0.029039	0.811012	0.0568895	0.0243309	0.805395	0.0488064	y	3	higher		8.69322	8.84853	8.89313	8.32913	8.53047	8.57761	8.73776	8.95222	8.81182	8.23484	8.49509	8.60151
ENSMUSG00000046519	0.0466158	0.263589	0.896904	0.694798	0.19656	0.333457	n	3			6.21206	6.38364	6.31706	5.9692	6.17673	6.09	5.91422	6.27988	6.20586	6.05955	6.45016	6.46373
ENSMUSG00000046722	0.111353	0.0746609	0.192633	0.770048	0.531828	0.620491	n	3			8.56563	8.68702	8.57931	8.69012	8.67825	8.80602	8.82095	8.69621	8.71044	8.90029	8.91434	8.59836
ENSMUSG00000048109	0.298341	0.841507	0.0406138	0.352416	0.162991	0.0442312	n	3			8.63802	8.48049	8.38767	8.577	8.79138	8.52856	8.40585	8.62897	8.53386	8.66947	8.87772	8.93178
ENSMUSG00000049504	5.10662e-05	2.19595e-05	1.31133e-05	0.658209	0.00348906	0.0014786	n	3			5.10739	5.28947	5.09461	7.42662	7.69412	7.68858	7.39725	7.6229	7.6229	8.63906	8.54416	8.5233
ENSMUSG00000050144	0.104694	0.280062	0.521933	0.658666	0.9446	0.826887	n	3			6.70687	6.44067	6.40155	6.86189	6.78471	6.65313	6.89988	6.7063	6.5041	7.33225	6.93556	6.11684
ENSMUSG00000050192	0.00345784	0.0106733	0.0063658	0.591446	0.0812438	0.0539333	n	3			5.95543	5.80796	5.80796	6.42055	6.63771	6.41058	6.26279	6.57287	6.42938	6.68735	6.7334	7.0526
ENSMUSG00000052539	9.18665e-05	0.0150177	0.00275438	0.0165235	0.221907	0.00539543	y	3	intermediate		5.75258	5.70159	5.75397	6.20681	6.19575	6.23057	5.89396	6.02501	5.96056	6.19904	6.32954	6.33694
ENSMUSG00000053870	0.52386	0.138818	0.51267	0.289661	0.849408	0.45923	n	3			6.18444	6.23057	6.32184	6.11441	6.50525	6.38903	6.28624	6.70097	6.66956	6.07405	6.41399	6.64438
ENSMUSG00000053931	0.0792365	0.00347737	0.0819367	0.0406341	0.646435	0.123153	y	3	higher		6.78865	6.92928	6.85031	7.11278	7.11333	6.91743	7.22097	7.40552	7.28615	6.94298	7.12983	7.22941
ENSMUSG00000054942	0.379983	0.472269	0.211538	0.690603	0.394953	0.311755	n	3			5.56034	5.64211	5.86196	5.39212	5.60886	5.68939	5.56257	5.57135	5.68538	4.99161	5.59524	5.48705
ENSMUSG00000055436	0.974119	0.0504949	0.499046	0.0467169	0.469596	0.143991	n	3			9.807	10.0944	10.0499	9.88237	10.0716	10.0083	10.1806	10.3712	10.5346	9.87493	10.1539	10.2393
ENSMUSG00000060798	0.00466601	0.199747	0.0777418	0.617428	0.0214138	0.0236795	n	3			4.84525	4.91117	4.79889	4.48045	4.61909	4.53106	4.36971	4.71336	4.77343	5.00017	5.35302	5.39212
ENSMUSG00000062127	0.216674	0.0154017	0.129981	0.0682691	0.44562	0.0608845	n	3			7.4431	7.39418	7.41464	7.42109	7.49348	7.58299	7.32878	7.3242	7.34421	7.4596	7.5637	7.67011
ENSMUSG00000063052	0.238028	0.0472972	0.328493	0.138474	0.76754	0.402001	n	3			7.32148	7.49304	7.59256	7.524	7.71536	7.58009	7.84025	7.64735	7.96704	7.37322	7.7891	7.80722
ENSMUSG00000063273	0.229981	0.0875226	0.254604	0.502914	0.494441	0.156439	n	3			9.5874	9.619	9.62293	9.63243	9.71926	9.93305	9.79752	9.74794	10.0002	9.72997	9.73076	9.58942
ENSMUSG00000064068	0.916552	0.840735	0.921754	0.761272	0.999226	0.776163	n	3			11.5321	11.3098	11.2258	11.5615	11.2435	11.3073	11.4852	11.2727	11.2321	11.5776	11.3139	11.2204
ENSMUSG00000068823	0.0139301	0.0169934	0.226301	0.946241	0.989901	0.987749	n	3			11.8323	11.9212	11.8798	11.644	11.7545	11.6539	11.6193	11.6983	11.7457	11.4953	11.6773	11.8848
ENSMUSG00000068917	0.0529769	0.310443	0.806844	0.115342	0.0271935	0.3446	n	3			7.46244	7.69234	7.66918	7.33089	7.30001	7.40306	7.3838	7.59499	7.51147	7.51437	7.68935	7.54883
ENSMUSG00000068921	0.0379173	0.0323959	0.000515501	0.61952	0.00117028	0.00374764	n	3			11.0192	10.9926	10.9174	10.8995	10.7833	10.7823	10.8386	10.8733	10.8234	10.2722	10.2931	10.4139
ENSMUSG00000069094	0.00166711	0.155688	9.45509e-06	0.113997	0.00257313	0.0175384	n	3			7.02262	6.99113	7.0071	7.18564	7.22222	7.16776	7.10292	7.01995	7.15539	7.34782	7.37618	7.35704
ENSMUSG00000070392	0.0681152	0.114831	0.362498	0.831297	0.344614	0.46144	n	3			6.70787	6.70048	6.8366	6.60787	6.37369	6.57555	6.61879	6.37972	6.63384	6.69035	6.47137	6.76522
ENSMUSG00000074396	0.466014	0.385095	0.814798	0.303929	0.741453	0.863473	n	3			8.54479	8.5253	8.44508	8.55602	8.55237	8.4958	8.28131	8.60601	8.25061	8.72034	8.67891	7.90255
ENSMUSG00000074604	0.0937123	0.0314195	0.0118404	0.215082	0.435918	0.422287	n	3			7.8169	7.71306	7.74307	7.18176	7.6163	7.14771	7.00335	7.26071	6.75286	7.00335	7.18634	7.29376
ENSMUSG00000006390	0.733435	0.391505	0.0121387	0.553677	0.0293592	0.13392	n	4		SO	5.93276	6.00712	6.05955	6.03975	6.13693	5.90762	6.0999	6.26738	5.94205	6.20956	6.38431	6.36637
ENSMUSG00000015247	0.0134161	0.00578514	0.0210563	0.0608145	0.357751	0.256824	n	4		SO	6.52287	6.76296	6.70372	6.95053	7.12743	7.12012	7.21477	7.42721	7.56823	7.01158	7.19704	7.39884
ENSMUSG00000028249	0.309099	0.543948	0.201826	0.0627192	0.636867	0.0551094	n	4		SO	7.7949	8.0134	8.00417	7.75193	7.91826	7.83581	7.93847	8.03516	7.99874	7.69067	7.82285	7.87947
ENSMUSG00000028399	0.846289	0.476961	0.382451	0.468027	0.393786	0.916343	n	4		SO	5.89802	5.79274	5.7761	6.01748	5.6127	5.91933	5.8439	5.43476	5.83382	5.91472	5.48899	5.64726
ENSMUSG00000028402	0.0806478	0.28981	0.110899	0.222097	0.940035	0.252114	n	4		SO	5.27916	5.44076	5.37619	5.01626	5.27606	4.97436	5.12219	5.3221	5.33849	4.88759	5.06445	5.27916
ENSMUSG00000028464	0.620225	0.124308	0.0638969	0.171475	0.0679483	0.891827	n	4		SO	6.76573	6.89092	7.04028	6.98371	6.96058	6.89434	7.21947	7.27521	6.95273	7.05559	7.15457	7.29005
ENSMUSG00000028466	0.298755	0.0141724	0.0704857	0.108771	0.570519	0.127122	n	4		SO	7.54023	7.57457	7.48197	7.56284	7.83409	7.57027	7.80169	7.99818	7.85576	7.62855	7.70444	7.83629
ENSMUSG00000028557	0.148261	0.773725	0.716274	0.38986	0.127857	0.6441	n	4		SO	8.63303	8.60966	8.61549	8.49888	8.36189	8.57335	8.70258	8.40214	8.66074	8.5358	8.65139	8.74834
ENSMUSG00000028641	0.0474325	0.505887	0.106411	0.10938	0.287001	0.118975	n	4		SO	5.50341	5.60558	5.54489	5.26904	5.10739	5.37619	5.32042	5.54965	5.58129	5.36367	4.81333	4.61909
ENSMUSG00000028645	0.218036	0.0150334	0.0287516	0.217773	0.10329	0.389037	n	4		SO	5.84981	5.76462	5.8261	5.988	6.06485	5.79934	5.9997	6.16698	6.10758	6.10758	6.10168	6.32797
ENSMUSG00000028649	0.264997	0.0232845	0.100698	0.137287	0.385789	0.529656	n	4		SO	7.82054	7.94039	7.92412	7.95682	8.16389	7.91666	8.0757	8.22983	8.29286	7.95265	8.20149	8.22049
ENSMUSG00000028675	0.588555	0.490193	0.1267	0.260617	0.189363	0.0696888	n	4		SO	7.73578	8.25061	8.13789	7.73875	8.12364	7.921	7.90585	8.21436	8.56927	7.34022	7.53401	7.91718
ENSMUSG00000028843	0.97538	0.264295	0.695692	0.121169	0.662638	0.30334	n	4		SO	7.58539	7.45385	7.41201	7.51654	7.45485	7.4855	7.61404	7.58365	7.50192	7.45178	7.26774	7.59307
ENSMUSG00000028868	0.745903	0.00885616	0.542116	0.036337	0.868554	0.0116886	y	4	higher	SO	7.55214	7.67486	7.60014	7.62855	7.72208	7.54263	7.8324	7.89178	7.86058	7.57527	7.69164	7.65966
ENSMUSG00000033295	0.406185	0.0988624	0.276711	0.501174	0.826633	0.636316	n	4		SO	6.95761	6.59019	6.59398	7.19562	6.60402	6.93396	7.23329	6.86535	7.09059	7.27149	6.7593	6.86535
ENSMUSG00000033379	0.11503	0.0879512	0.0381038	0.903538	0.29229	0.303227	n	4		SO	8.62702	8.43667	8.44437	8.79734	8.68444	8.57063	8.80692	8.67362	8.60601	8.74163	8.77828	8.809
ENSMUSG00000037295	0.524355	0.53792	0.158971	0.36399	0.968519	0.324586	n	4		SO	5.32042	5.32916	5.34327	5.28156	5.34646	5.55197	5.45492	5.2319	5.04235	5.38625	5.35017	5.45492
ENSMUSG00000038729	0.0628336	0.0508921	0.0146562	0.170264	0.0305183	0.193395	n	4		SO	6.99464	7.07783	7.09505	7.00447	6.9015	6.88625	6.91392	6.65313	6.76788	6.75149	6.5883	6.50525
ENSMUSG00000038816	0.91093	0.246186	0.690052	0.316436	0.641216	0.213529	n	4		SO	6.24864	6.56019	6.46822	6.22532	6.53064	6.57235	6.4092	6.68651	6.75452	6.09786	6.37484	6.58484
ENSMUSG00000040410	0.874224	0.552544	0.962218	0.571009	0.851952	0.572965	n	4		SO	5.42439	5.72553	5.85716	5.56465	5.6795	5.84027	5.601	5.76462	5.96441	5.40945	5.61467	5.95211
ENSMUSG00000041058	0.088049	0.306874	0.00885511	0.22436	0.003351	0.00956622	n	4		SO	7.03531	7.08764	7.11278	6.95213	7.01859	7.03478	7.06057	7.0158	7.06125	7.24955	7.33587	7.37568
ENSMUSG00000060206	0.037339	0.04401	0.00767967	0.862192	0.150593	0.244225	n	4		SO	5.98614	5.66818	5.70475	6.26603	6.36637	6.02988	6.30995	6.01645	6.42322	6.62818	6.33694	6.40713
ENSMUSG00000066324	0.204852	0.104757	0.202715	0.176455	0.0726428	0.0347051	n	4		SO	6.33453	6.39759	6.3913	6.3657	6.53371	6.58651	6.93827	6.49205	6.92636	6.38903	6.07665	6.10855
ENSMUSG00000073802	0.000142673	0.0457261	0.0211797	0.0395791	0.982862	0.0763941	y	4	intermediate	SO	7.20654	7.28053	7.178	7.7812	7.80921	7.87902	7.60874	7.36384	7.56203	7.61831	7.9351	7.92374
ENSMUSG00000000411	0.736958	0.0747788	0.392601	0.0451863	0.342761	0.125718	n	4		PM	11.6231	11.6071	11.6231	11.6362	11.6983	11.5639	11.4918	11.4673	11.3098	11.5151	11.6608	11.525
ENSMUSG00000003731	0.17807	0.23039	0.355627	0.440193	0.732758	0.685334	n	4		PM	9.94296	10.0188	10.071	9.83644	9.68806	9.99145	9.8756	9.13135	9.81399	10.1255	9.75785	9.36247
ENSMUSG00000006221	0.11514	0.0114326	0.309783	0.809549	0.844753	0.919984	n	4		PM	7.14691	6.91923	6.86007	6.58177	5.89396	6.63994	6.34057	6.25551	6.32184	7.09259	6.40827	5.2319
ENSMUSG00000015242	0.145576	0.00874778	0.0474464	0.0703548	0.0142789	0.00405596	n	4		PM	9.57281	9.64149	9.77219	9.39596	9.43818	9.63583	9.33119	9.29258	9.12642	9.81314	10.06	10.1125
ENSMUSG00000023151	0.426192	0.927724	0.748014	0.408147	0.827289	0.726326	n	4		PM	8.72761	8.65235	8.80602	8.75321	9.07637	8.70746	8.69568	8.82251	8.64794	8.43855	8.95633	8.99165
ENSMUSG00000028259	0.730722	0.401436	0.773286	0.377149	0.918484	0.324578	n	4		PM	11.6296	11.7066	11.8225	11.639	11.936	11.7029	11.5917	11.6755	11.7029	11.6114	11.8323	11.797
ENSMUSG00000028264	0.447336	0.206841	0.872167	0.499006	0.307578	0.107425	n	4		PM	11.5374	11.7576	11.8574	11.4998	11.5877	11.7576	11.5447	11.4524	11.639	11.5917	11.8092	11.8133
ENSMUSG00000028277	0.108111	0.482955	0.0590131	0.718023	0.248788	0.24982	n	4		PM	11.8225	11.888	11.8848	11.7504	11.7931	11.8408	11.7119	11.8752	11.8681	11.6809	11.6899	11.8092
ENSMUSG00000028287	0.982832	0.538136	0.956431	0.415008	0.889452	0.3897	n	4		PM	12.128	12.3057	12.33	12.2072	12.2723	12.2793	12.2147	12.1042	12.2793	12.1983	12.3057	12.2723
ENSMUSG00000028337	0.026151	0.0213319	0.406137	0.414954	0.0823979	0.041163	n	4		PM	7.52818	7.55478	7.58476	6.91667	6.8521	7.17752	6.72856	6.74591	7.06702	7.32659	7.2018	7.68534
ENSMUSG00000028383	0.188775	0.407541	0.0929386	0.0136626	0.380175	0.0267625	y	4	lower	PM	9.52351	9.66285	9.70408	9.67949	9.76339	9.7598	9.5694	9.55065	9.59924	9.70936	9.79028	9.85326
ENSMUSG00000028389	0.828324	0.0914691	0.453082	0.0481653	0.519995	0.116261	n	4		PM	9.52919	9.67949	9.81314	9.57992	9.81774	9.69857	9.3843	9.47546	9.46055	9.52919	9.92907	9.98812
ENSMUSG00000028411	0.585976	0.0738593	0.469713	0.067041	0.658439	0.534482	n	4		PM	10.2918	10.4034	10.5044	10.3356	10.4418	10.285	10.23	10.23	10.1613	10.0716	10.3516	10.4554
ENSMUSG00000028427	0.986551	0.0898616	0.784539	0.0886905	0.80393	0.0839677	n	4		PM	9.51822	9.43329	9.50617	9.53045	9.49603	9.43329	9.34755	9.12138	8.94375	9.44215	9.53483	9.51463
ENSMUSG00000028436	0.0876605	0.569285	0.0409028	0.321977	0.531888	0.180719	n	4		PM	10.1507	10.1507	10.1507	10.4366	10.316	10.2401	10.3088	10.286	10.0349	10.4525	10.4045	10.2896
ENSMUSG00000028441	0.171897	0.796685	0.052697	0.150759	0.45862	0.041591	n	4		PM	11.7029	11.644	11.6723	11.7757	11.9324	11.7119	11.5854	11.7545	11.6336	11.7707	11.9475	11.9109
ENSMUSG00000028492	0.648103	0.736725	0.668815	0.564064	0.809032	0.63431	n	4		PM	9.33403	9.2096	9.33046	9.49356	9.03484	9.63932	9.58942	8.74712	9.25227	9.49747	9.29948	9.21098
ENSMUSG00000028520	0.120799	0.172543	0.382459	0.56896	0.468204	0.741742	n	4		PM	10.3659	10.5266	10.6132	10.5685	10.8327	10.7277	10.6004	10.6033	10.7522	10.4385	10.7256	10.6813
ENSMUSG00000028523	0.0130222	0.0219419	0.217692	0.778382	0.043702	0.0420313	n	4		PM	10.3453	10.4406	10.4987	10.1167	10.2496	10.1314	10.1364	10.1539	10.1664	10.2569	10.3955	10.3634
ENSMUSG00000028533	0.493039	0.0252643	0.770782	0.104129	0.393593	0.0376267	n	4		PM	10.4987	10.6483	10.7107	10.3466	10.629	10.6241	10.3018	10.2446	10.2736	10.4929	10.7539	10.7067
ENSMUSG00000028555	0.0115334	0.0521902	0.0289027	0.25113	0.975363	0.247852	n	4		PM	10.2821	10.1906	10.2354	10.0944	10.0659	10.0484	10.0772	9.95351	9.81002	10.0201	10.1459	10.0468
ENSMUSG00000028575	0.739111	0.124244	0.627181	0.0612638	0.824044	0.104527	n	4		PM	9.39326	9.60008	9.76912	9.45929	9.68364	9.77324	9.28037	9.28876	9.40525	9.41504	9.79991	9.81667
ENSMUSG00000028589	0.681023	0.0187723	0.954508	0.0264117	0.767917	0.0595656	y	4	lower	PM	9.7598	9.80802	9.87493	9.70486	9.87493	9.78332	9.50244	9.63674	9.44745	9.6465	9.93305	9.88095
ENSMUSG00000028678	0.977906	0.0864186	0.615872	0.0532529	0.540127	0.0154915	n	4		PM	9.94115	10.0583	10.0316	9.99145	10.0649	9.97073	9.89733	9.94864	9.88425	10.018	10.0785	10.0043
ENSMUSG00000028706	0.674549	0.189866	0.18462	0.145339	0.693997	0.125379	n	4		PM	9.65029	9.72247	9.70255	9.6947	9.65198	9.79466	9.54657	9.45752	9.68806	9.72434	9.72364	9.75165
ENSMUSG00000028716	0.0134909	0.0246475	0.0448702	0.0868225	0.362722	0.0576355	n	4		PM	9.95138	9.76564	9.82246	9.61765	9.53872	9.46374	9.32223	9.18636	8.84116	9.50516	9.64027	9.70174
ENSMUSG00000028758	0.935361	0.127128	0.243835	0.115006	0.26316	0.0376137	n	4		PM	10.5213	10.2144	10.2169	10.4802	10.1441	10.365	10.2522	9.90375	9.83122	10.7119	10.4265	10.3991
ENSMUSG00000028789	0.224965	0.289887	0.870802	0.122526	0.478114	0.540099	n	4		PM	10.2323	9.99056	10.0139	10.3874	10.1488	10.1676	10.1292	9.84332	9.57369	10.3697	10.1327	9.60534
ENSMUSG00000028801	0.160255	0.0642012	0.228981	0.273377	0.313528	0.431757	n	4		PM	8.73899	8.54479	8.53047	8.3871	7.75815	8.36526	8.21359	7.38878	7.69805	8.0358	7.52545	4.36971
ENSMUSG00000028890	0.200479	0.10734	0.501151	0.348108	0.927225	0.623028	n	4		PM	8.72967	8.49712	8.47426	8.54644	8.14923	8.34527	8.46303	7.89935	8.0036	8.78615	8.42006	7.73552
ENSMUSG00000029001	0.0396138	0.068851	0.00434046	0.494322	0.0195573	0.00808372	n	4		PM	8.09196	7.82054	7.81058	8.31968	8.12575	8.36363	8.27444	8.15851	8.18641	8.66532	8.51791	8.72907
ENSMUSG00000029074	0.494077	0.138261	0.325611	0.296021	0.367947	0.484913	n	4		PM	9.95835	9.81077	9.77099	9.8392	9.08706	9.94035	9.66108	8.61509	9.13024	9.81667	8.88603	4.55118
ENSMUSG00000035696	0.414546	0.886135	0.941501	0.441401	0.544125	0.963054	n	4		PM	11.1266	11.1544	11.0795	11.0776	11.1211	11.0907	11.1494	11.1621	11.0661	11.0641	11.1165	11.1901
ENSMUSG00000036921	0.703358	0.0926482	0.849874	0.103138	0.716029	0.127361	n	4		PM	8.98834	8.95851	8.99913	8.95473	9.04742	8.87853	8.77541	8.89652	8.65705	8.86309	8.96626	9.17625
ENSMUSG00000038709	0.381466	0.264808	0.300388	0.481646	0.184459	0.112016	n	4		PM	11.0337	11.093	11.1411	10.9595	11.1231	11.0127	10.7992	11.1197	10.924	11.0324	11.2837	11.3848
ENSMUSG00000039137	0.0676938	0.157563	0.0458909	0.535885	0.654168	0.322785	n	4		PM	5.47288	4.90657	5.00657	6.01336	5.39592	5.91853	5.97651	5.32042	5.47054	6.29688	5.58704	5.8534
ENSMUSG00000039158	0.00123688	3.31434e-05	0.00011548	0.695834	0.97911	0.620411	n	4		PM	7.56823	7.60501	7.4989	6.67008	6.52681	6.7453	6.66191	6.55189	6.63519	6.71139	6.56663	6.6577
ENSMUSG00000039611	0.0323219	0.00392161	0.0084925	0.0831766	0.00151918	0.0045594	n	4		PM	8.34403	8.26847	8.30058	8.22654	8.1431	8.10959	8.06206	8.03734	8.0538	8.53047	8.53831	8.65308
ENSMUSG00000040935	0.00322131	0.00482085	0.0036981	0.00941395	0.0042725	0.0307071	y	4	intermediate	PM	7.64016	7.68141	7.63323	7.41842	7.34168	7.32148	7.07024	6.94767	6.8686	6.54269	6.78635	6.63927
ENSMUSG00000041399	0.0226126	0.0708342	0.264031	0.0112312	0.326047	0.0307938	y	4	lower	PM	11.6899	11.7603	11.7211	11.7903	11.8574	11.8637	11.615	11.6649	11.5321	11.7829	11.8531	11.7171
ENSMUSG00000041556	0.329236	0.433279	0.980337	0.228809	0.317266	0.425243	n	4		PM	8.28864	8.11513	8.15033	8.41005	8.15292	8.29995	8.30797	8.00748	7.80785	8.24668	8.20532	8.1074
ENSMUSG00000043633	0.128758	0.896405	0.0206697	0.118222	0.0614709	0.0171099	n	4		PM	9.97962	10.0591	10.1075	10.1234	10.3925	10.1962	9.99573	10.1314	9.99454	10.3769	10.6085	10.6902
ENSMUSG00000044556	0.053263	0.0619903	0.0261033	0.113183	0.00426969	0.0210756	n	4		PM	8.42749	8.42749	8.48049	8.35581	8.35684	8.25	8.14486	8.15912	7.82802	8.55801	8.67113	8.68444
ENSMUSG00000045004	0.525949	0.74603	0.243921	0.375849	0.676559	0.154156	n	4		PM	12.007	11.7667	11.7457	12.128	11.7504	11.9293	11.9604	11.7211	11.7171	12.1502	11.8922	11.9475
ENSMUSG00000047518	0.233806	0.592026	0.465027	0.15171	0.612366	0.278303	n	4		PM	11.177	10.8099	10.798	11.4741	11.0429	11.0602	11.1305	10.6987	10.5943	11.3461	11.048	10.8519
ENSMUSG00000048686	0.101758	0.520892	0.135764	0.101025	0.881959	0.184077	n	4		PM	12.2147	12.3617	12.3617	12.3916	12.5106	12.43	12.324	12.3804	12.3493	12.3493	12.4898	12.4665
ENSMUSG00000048772	0.608846	0.985069	0.315761	0.499229	0.579036	0.089547	n	4		PM	11.1197	11.2815	11.3272	11.1819	11.369	11.3177	11.2929	11.2375	11.1938	11.3254	11.3394	11.3139
ENSMUSG00000048824	0.00912195	0.000661962	0.00213746	0.00196213	0.00707619	0.287582	y	4	lower	PM	7.02652	7.18176	7.18973	6.66672	6.86535	6.74954	5.92749	6.05322	5.76154	5.89157	6.10073	6.22532
ENSMUSG00000051276	0.321081	0.333203	0.0111504	0.0810616	0.0054943	0.0282177	n	4		PM	11.399	11.4271	11.5027	11.525	11.4643	11.4673	11.4398	11.3348	11.4093	11.2764	11.2764	11.1808
ENSMUSG00000051435	0.146489	0.7141	0.0971115	0.0966892	0.607839	0.0658934	n	4		PM	9.94035	9.54179	9.50677	10.0716	9.80484	10.0349	9.86683	9.48694	9.3993	10.2263	9.91494	9.98091
ENSMUSG00000053510	0.228085	0.170028	0.019501	0.739212	0.0334935	0.0456767	n	4		PM	10.5768	10.3828	10.3854	10.5866	10.6132	10.4802	10.6621	10.5402	10.5393	10.7954	10.6699	10.8313
ENSMUSG00000055900	0.191612	0.666476	0.0516938	0.233055	0.114061	0.041049	n	4		PM	5.84525	5.96056	6.01009	5.94682	6.09094	6.17923	5.65401	6.01748	5.96598	6.22532	6.2688	6.59463
ENSMUSG00000058046	0.740177	0.0578152	0.590349	0.0439395	0.504993	0.0282343	y	4	lower	PM	7.67486	7.69923	7.69533	7.4989	7.67541	7.79634	6.89577	7.32944	7.2544	7.5902	7.71424	7.99059
ENSMUSG00000058935	0.0736872	0.00421324	0.0570098	0.0169432	0.0239637	0.00113294	y	4	lower	PM	10.9193	10.8087	10.8926	10.8029	10.7594	10.7522	10.432	10.4948	10.3057	10.9706	11.0167	11.138
ENSMUSG00000059343	0.791066	0.328715	0.167955	0.411256	0.213608	0.877656	n	4		PM	9.72705	9.93659	10.0281	9.72364	10.0033	9.86255	9.489	9.76727	9.91585	9.56579	9.70648	9.82696
ENSMUSG00000060491	0.488143	0.0869397	0.391554	0.0140512	0.634643	0.0779181	n	4		PM	9.66108	9.91927	9.98812	9.82984	10.0295	9.98091	9.49076	9.70344	9.52652	9.72927	10.2027	10.1724
ENSMUSG00000063077	0.99058	0.122219	0.125286	0.0967394	0.0628315	0.0188028	n	4		PM	6.85317	6.69416	6.65169	6.76643	6.76788	6.66738	6.66858	6.56162	6.44143	6.90939	6.79505	6.94824
ENSMUSG00000070979	0.255927	0.0808659	0.612735	0.0211309	0.202061	0.258863	n	4		PM	11.2973	11.4093	11.4595	11.4339	11.4953	11.4608	11.3011	11.1586	11.2587	11.3381	11.4595	11.2348
ENSMUSG00000070999	0.521011	0.205743	0.684594	0.125366	0.297359	0.272381	n	4		PM	11.157	10.9555	11.1128	11.2204	11.1666	11.0192	11.0853	10.8258	10.719	10.9533	11.1329	11.0337
ENSMUSG00000073731	0.548128	0.345181	0.525409	0.215556	0.958941	0.217814	n	4		PM	11.2993	11.0414	11.0146	11.3896	11.0576	11.1701	11.2321	10.8154	10.6645	11.3294	11.0835	11.1844
ENSMUSG00000073758	0.478171	0.863591	0.795743	0.49467	0.432422	0.985462	n	4		PM	11.2172	11.138	11.1938	11.3312	11.0776	11.3917	11.3333	10.9926	11.1648	11.2993	11.1266	11.0576
ENSMUSG00000078554	0.337787	0.0347936	0.188137	0.0525216	0.121353	0.264447	n	4		PM	10.8276	10.7594	10.8541	10.9926	10.743	11.1211	10.458	10.6634	10.5698	10.8029	10.6799	10.5639
ENSMUSG00000078577	0.898957	0.641595	0.860798	0.657986	0.737354	0.481342	n	4		PM	11.5543	11.9571	12.0097	11.6682	12.014	11.9109	11.8278	11.9212	12.014	11.5374	11.9444	11.9293
ENSMUSG00000078593	0.166198	0.473984	0.115545	0.055856	0.564162	0.044395	n	4		PM	11.4545	11.1266	11.1648	11.5543	11.3524	11.4791	11.264	11.1982	10.9493	11.6296	11.3381	11.639
ENSMUSG00000006699	0.248479	0.0314682	0.969515	0.076974	0.174255	0.022526	n	4		MI	9.04141	9.42843	9.435	9.35065	9.60746	9.59052	9.66335	9.89818	10.0866	9.09499	9.4429	9.34659
ENSMUSG00000008489	0.407997	0.94668	0.209136	0.551031	0.0995	0.278133	n	4		MI	6.0265	5.75982	5.65721	6.28624	5.91422	5.77207	6.11519	5.4654	5.9109	5.83382	5.3989	5.31079
ENSMUSG00000028211	0.607896	0.0282182	0.418521	0.169279	0.663593	0.497001	n	4		MI	6.73813	6.80582	6.91252	6.84039	7.06057	6.7394	6.99051	7.05159	7.18045	6.68651	7.08128	7.10824
ENSMUSG00000028282	0.193439	0.19928	0.488247	0.843074	0.388865	0.368175	n	4		MI	6.91859	7.08826	7.30172	7.17909	7.55775	7.30721	7.25381	7.23038	7.676	7.03802	7.31198	7.28245
ENSMUSG00000028293	0.976237	0.0135236	0.108818	0.0282598	0.129538	0.298399	y	4	higher	MI	5.79147	5.95823	5.84981	5.78153	5.9997	5.81025	6.06168	6.21309	6.21206	6.00934	5.95699	6.19719
ENSMUSG00000028309	0.0443674	0.190637	0.0110097	0.215837	0.74965	0.0956207	n	4		MI	7.07783	6.95892	7.11432	6.86535	6.86734	6.66249	7.0131	6.96242	6.81702	6.78105	6.71274	6.82221
ENSMUSG00000028378	0.928025	0.000682595	0.161793	0.0156725	0.207973	0.00530514	y	4	higher	MI	8.89941	8.96372	8.92001	8.81324	9.03976	8.95078	9.27402	9.37312	9.32492	8.72104	8.75904	8.9196
ENSMUSG00000028393	0.00433645	0.173771	0.000802211	0.435991	0.00314029	0.00628185	n	4		MI	8.20651	8.27486	8.31486	8.06881	8.00234	7.96984	7.93631	8.1295	8.22336	7.54597	7.38247	7.54397
ENSMUSG00000028405	0.609409	0.166483	0.190018	0.0731482	0.286439	0.0733891	n	4		MI	6.60479	6.87783	6.84492	6.57997	6.85517	6.69752	6.8641	6.95804	7.03802	6.26603	6.48117	6.75805
ENSMUSG00000028419	0.0879242	0.00412109	0.0810343	0.0312287	0.685228	0.0858837	y	4	higher	MI	8.32986	8.5451	8.50454	8.58777	8.82618	8.63225	8.88187	9.02011	9.09749	8.55353	8.78501	8.86309
ENSMUSG00000028423	0.0675263	0.00502087	0.0351418	0.0742918	0.196415	0.817824	n	4		MI	7.38961	7.38845	7.28129	7.4459	7.48245	7.61276	7.74307	7.59533	7.68534	7.56877	7.59456	7.79743
ENSMUSG00000028431	0.00875261	0.000177257	0.00700034	0.0978067	0.0739773	0.433858	n	4		MI	6.5382	6.54084	6.47137	6.95761	7.04944	6.85254	7.04712	7.11749	7.15153	7.03478	7.2319	7.26312
ENSMUSG00000028476	0.189192	0.545527	0.938227	0.217464	0.423741	0.56142	n	4		MI	6.53424	6.59672	6.76241	6.51251	6.53996	6.45292	6.49297	6.75805	6.94185	6.41751	6.6158	6.82586
ENSMUSG00000028478	0.0307908	0.00183744	0.122127	0.00839576	0.761168	0.0213713	y	4	higher	MI	8.03879	8.11393	8.10655	8.25765	8.22251	8.37385	8.61444	8.50742	8.65514	8.24059	8.14576	8.38542
ENSMUSG00000028488	0.632856	0.163459	0.625261	0.12337	0.879072	0.169716	n	4		MI	6.46134	6.31434	6.2852	6.41547	6.11098	6.36289	6.71863	6.3657	6.64056	6.55683	6.14364	6.10405
ENSMUSG00000028517	0.114512	0.0997329	0.286394	0.0470435	0.886705	0.0432357	y	4	higher	MI	7.85173	7.74531	8.0271	7.62803	7.58365	7.78236	8.26342	8.06638	8.64219	7.34375	7.65966	7.90846
ENSMUSG00000028530	0.028739	0.00548291	0.0230367	0.102861	0.181237	0.749004	n	4		MI	7.53774	7.33795	7.33286	7.82086	7.59889	7.72444	7.91239	7.79143	7.97491	7.88466	7.77256	8.15395
ENSMUSG00000028556	0.872419	0.94769	0.643047	0.939068	0.584829	0.644633	n	4		MI	8.22336	8.37041	8.52274	8.31337	8.62897	8.24939	8.12757	8.5358	8.48586	8.01121	8.36973	8.48196
ENSMUSG00000028609	0.0622188	0.00503856	0.145174	0.0620662	0.986322	0.140565	n	4		MI	8.99597	9.11915	9.08434	9.17082	9.42655	9.36721	9.47049	9.58486	9.69356	9.14136	9.29388	9.537
ENSMUSG00000028647	0.0653227	0.849966	0.0160678	0.148402	0.266139	0.0496289	n	4		MI	9.3843	9.30143	9.39596	9.44215	9.43726	9.53778	9.46055	9.32986	9.32402	9.51208	9.489	9.5883
ENSMUSG00000028657	0.85495	0.279505	0.232938	0.134473	0.207334	0.0334177	n	4		MI	9.64824	9.99454	9.95938	9.70408	9.95835	9.86145	9.90461	10.0468	10.1581	9.4951	9.77453	9.73531
ENSMUSG00000028683	0.11387	0.0213363	0.296943	0.636776	0.774023	0.52129	n	4		MI	7.15539	7.24205	7.1736	7.30978	7.56454	7.32721	7.34828	7.48764	7.51654	7.13112	7.40074	7.5354
ENSMUSG00000028684	0.0116485	0.00271137	0.0077527	0.348108	0.0486527	0.104932	n	4		MI	7.33624	7.40812	7.41721	7.94733	8.22393	7.98032	8.06732	8.28685	8.14645	8.23992	8.50389	8.60678
ENSMUSG00000028692	0.083223	0.00458597	0.37893	0.0145542	0.651581	0.058732	y	4	higher	MI	9.84004	9.87493	9.85768	10.0436	10.0906	9.91927	10.2313	10.2918	10.3597	9.86255	9.8756	10.1539
ENSMUSG00000028759	0.0042103	0.00043385	0.0511965	0.0274245	0.34753	0.770088	y	4	higher	MI	7.06057	7.15592	7.1018	7.32195	7.44405	7.38075	7.50546	7.5602	7.5608	7.30825	7.56518	7.64937
ENSMUSG00000028788	0.193505	0.0744681	0.224685	0.273924	0.854479	0.40225	n	4		MI	8.06149	8.07405	8.01401	8.10959	8.13193	8.35637	8.34084	8.20072	8.51519	8.21277	8.05494	8.40585
ENSMUSG00000028795	0.563382	0.0132891	0.00436069	0.0573146	0.0268031	0.305677	n	4		MI	6.52681	6.5301	6.69179	6.64272	6.78865	6.50525	6.83133	7.03104	6.90407	6.91471	7.06468	7.05559
ENSMUSG00000028799	0.130262	0.0387384	0.942651	0.295542	0.542083	0.3166	n	4		MI	6.77217	6.70983	6.5883	6.97164	6.77388	6.79738	7.0843	6.8521	6.93896	6.83058	6.95602	6.33128
ENSMUSG00000028820	0.0383732	0.0394589	0.222224	0.435972	0.352774	0.171965	n	4		MI	9.60124	9.62367	9.59785	9.90375	9.85481	10.0854	10.0606	9.88425	10.2	9.8756	9.58376	9.95502
ENSMUSG00000028822	0.182758	0.0153228	0.555358	0.0497206	0.274364	0.0245671	y	4	higher	MI	7.69873	7.5602	7.43126	7.84025	7.74912	7.60274	8.23992	8.01956	7.92814	7.66632	7.5287	7.67275
ENSMUSG00000028826	0.0761479	0.00983826	0.399847	0.109062	0.0402229	0.0147135	n	4		MI	8.90691	8.983	9.05084	9.08434	9.23932	9.09053	9.26642	9.23776	9.3032	8.81645	9.00359	8.92608
ENSMUSG00000028833	0.144771	0.368444	0.227181	0.557482	0.664391	0.839096	n	4		MI	5.64726	5.47669	5.42728	5.95337	5.55831	5.80672	5.9109	5.52298	5.56034	5.76807	5.49418	5.83742
ENSMUSG00000028849	0.469051	0.987117	0.932264	0.543821	0.677775	0.946353	n	4		MI	6.96723	6.59463	6.73604	7.13688	6.56985	7.12144	7.12266	6.67588	6.51048	7.30721	6.37694	6.69606
ENSMUSG00000028879	0.718626	0.00478846	0.524445	0.010389	0.762316	0.014925	y	4	higher	MI	9.01919	9.11547	9.11994	8.98166	9.14136	9.06537	9.27989	9.36787	9.37772	8.93781	9.12421	9.05689
ENSMUSG00000028882	0.150916	0.0131199	0.594731	0.33708	0.346717	0.101096	n	4		MI	7.82802	7.81979	7.86717	7.96417	8.21632	7.9351	8.06881	8.22251	8.16714	7.73301	8.06553	7.89773
ENSMUSG00000028884	0.00250877	0.00184706	0.414597	0.0835147	0.0859913	0.0641163	n	4		MI	7.6163	7.6616	7.58947	7.87706	7.90367	7.81357	7.93175	7.95421	7.95314	7.54324	7.68235	7.27609
ENSMUSG00000028894	0.0634639	0.0194902	0.298246	0.163322	0.0483356	0.0182436	n	4		MI	7.42592	7.5608	7.6616	7.7399	7.83168	7.75929	7.80011	7.87829	7.98463	7.31166	7.32362	7.59533
ENSMUSG00000028955	0.525807	0.521701	0.46046	0.818512	0.823503	0.981098	n	4		MI	9.44622	9.5625	9.54657	9.46309	9.58486	9.33119	9.42144	9.55644	9.46374	9.42655	9.53438	9.47685
ENSMUSG00000028960	0.148586	0.234473	0.0567027	0.522017	0.387178	0.0875464	n	4		MI	7.19904	7.03168	7.02725	7.31198	7.15153	7.19428	7.2319	7.14821	7.15958	7.21477	7.28688	7.32833
ENSMUSG00000028961	0.008568	0.000144199	0.00786703	0.0180758	0.700554	0.0121451	y	4	higher	MI	7.73773	7.76189	7.66752	8.16232	8.22857	8.02954	8.52219	8.4946	8.54479	8.0271	8.08454	8.21001
ENSMUSG00000028967	0.78492	0.112438	0.872307	0.061178	0.970176	0.15164	n	4		MI	7.16341	7.24728	7.5637	7.27756	7.43354	7.13112	7.64937	7.47436	7.87512	7.04028	7.61704	7.20832
ENSMUSG00000029036	0.887004	0.00268565	0.0588438	0.133169	0.0813037	0.487911	n	4		MI	6.665	6.71085	6.61095	6.71592	6.85455	6.47137	6.96118	6.99023	6.88556	6.89213	6.97517	7.2312
ENSMUSG00000029038	0.60111	0.459953	0.0598323	0.669304	0.0459086	0.033892	n	4		MI	8.56691	8.49127	8.65308	8.55539	8.5607	8.71433	8.49233	8.82826	8.66532	8.09161	8.06048	8.41122
ENSMUSG00000029063	0.36705	0.249895	0.184267	0.581367	0.0815074	0.0533208	n	4		MI	8.14087	8.23291	8.25765	8.27685	8.26503	8.21674	8.21001	8.3216	8.29822	8.12519	8.19083	8.03223
ENSMUSG00000029064	0.134629	0.0180115	0.0415918	0.124814	0.0118837	0.00473687	n	4		MI	8.93486	9.01234	9.02888	9.15001	9.20558	9.01329	9.28266	9.17837	9.36432	8.54972	8.6398	8.81773
ENSMUSG00000032998	0.00735828	0.0856297	0.103312	0.7018	0.422404	0.347439	n	4		MI	6.76057	6.66809	6.67492	6.43448	6.41547	6.28434	6.45751	6.24527	6.56448	6.49641	6.22035	5.87559
ENSMUSG00000033253	0.246072	0.277356	0.194517	0.166315	0.100911	0.969081	n	4		MI	6.08883	6.16604	6.00824	6.08883	5.98175	5.87124	6.00222	6.60715	6.45292	6.11839	6.32323	6.5924
ENSMUSG00000035683	0.00849187	0.0413452	0.00697261	0.537725	0.131983	0.550703	n	4		MI	6.04097	6.13209	6.13693	6.38158	6.57086	6.52509	6.365	6.7334	6.63771	6.58484	6.60555	6.8052
ENSMUSG00000037266	0.378233	0.244327	0.260535	0.141053	0.41445	0.0928742	n	4		MI	8.97028	9.25813	9.29312	8.99463	9.15081	9.02321	9.25426	9.3266	9.82696	8.93964	9.14594	8.38923
ENSMUSG00000039740	0.201813	0.139862	0.359378	0.818122	0.440481	0.254063	n	4		MI	7.30001	7.18932	6.9034	7.52351	7.42212	7.17145	7.57721	7.326	7.31381	7.343	7.21284	7.2566
ENSMUSG00000039953	0.32036	0.472537	0.717388	0.687488	0.331307	0.536826	n	4		MI	7.71254	7.0576	7.20879	7.94142	7.43712	7.47522	7.80222	7.46244	7.305	7.51654	7.30073	7.4153
ENSMUSG00000039967	0.223456	0.852552	0.673465	0.677247	0.755943	0.885263	n	4		MI	5.68341	5.62214	5.53956	5.54489	5.57676	5.50913	5.65167	5.39592	5.73049	5.72553	5.45101	5.54172
ENSMUSG00000040928	0.21344	0.395444	0.269554	0.916476	0.609668	0.812888	n	4		MI	7.57581	7.48313	7.3242	7.74418	7.4596	7.68636	7.78529	7.34702	7.70363	7.6616	7.51978	7.54263
ENSMUSG00000040945	0.345431	0.10579	0.053348	0.293079	0.0148881	0.00926289	n	4		MI	8.98439	8.73066	8.70523	9.09297	8.82184	8.89243	9.08967	9.03261	9.02746	8.60897	8.49847	8.37902
ENSMUSG00000041459	0.031541	0.619099	0.0208521	0.0403646	0.13673	0.143765	n	4		MI	7.36545	7.4332	7.43963	7.08602	7.24251	7.03045	7.29754	7.49465	7.60595	7.29442	7.20254	7.29504
ENSMUSG00000043252	0.524095	0.121088	0.0490528	0.243689	0.0217653	0.0121238	n	4		MI	7.96657	8.16921	8.21102	8.045	8.25061	8.26917	8.20597	8.31968	8.50706	7.75062	7.81357	7.95555
ENSMUSG00000043411	0.451567	0.000550592	0.113869	0.00431121	0.0637556	0.00279306	y	4	lower	MI	7.84689	7.92374	7.84723	7.78182	7.90585	7.81639	7.49029	7.51736	7.56284	7.89506	8.03416	8.01193
ENSMUSG00000043872	0.0180974	0.0107206	0.0564333	0.609727	0.538316	0.746785	n	4		MI	6.8641	6.87713	6.92012	7.1826	7.30232	7.12587	7.17315	7.22036	7.33471	7.15904	7.20499	7.484
ENSMUSG00000047187	0.702117	0.0866129	0.769474	0.0339117	0.453878	0.0512481	n	4		MI	9.61261	9.88425	9.92651	9.79752	9.94864	9.81572	10.0065	10.06	10.1906	9.60262	9.77639	9.9181
ENSMUSG00000049225	0.238632	0.354706	0.880078	0.969773	0.530911	0.577273	n	4		MI	7.24785	7.39725	7.4788	7.1018	7.17988	7.38701	7.10373	7.12012	7.46244	7.12266	7.27521	7.64247
ENSMUSG00000050812	0.335507	0.337155	0.326335	0.842071	0.375933	0.364434	n	4		MI	7.66601	7.59785	7.62855	7.46483	7.26708	7.69486	7.60648	7.31448	7.60648	7.52978	7.15821	4.44688
ENSMUSG00000051675	0.157475	0.120335	0.0524418	0.543936	0.933797	0.544517	n	4		MI	7.05159	7.074	6.9455	7.33624	7.05357	7.47579	7.61084	7.10824	7.54806	7.29886	7.16656	7.43963
ENSMUSG00000052684	0.627299	0.087758	0.308986	0.170318	0.272687	0.170603	n	4		MI	5.76462	5.89157	5.73412	5.99194	5.68737	5.8737	6.0933	5.89269	6.22756	5.92917	5.30194	4.57551
ENSMUSG00000057637	0.184677	0.159455	0.457749	0.613364	0.0875909	0.0699281	n	4		MI	7.22608	7.1317	7.12069	7.20588	7.2312	7.23642	7.25036	7.17988	7.31198	7.05702	7.12331	7.17861
ENSMUSG00000061887	0.890196	0.185872	0.262537	0.205162	0.383059	0.399712	n	4		MI	7.62594	7.43963	7.53212	7.67486	7.45385	7.42662	7.54397	7.11153	7.11237	7.51384	7.45385	7.27454
ENSMUSG00000066043	0.00402316	0.00271804	0.19364	0.0127967	0.391253	0.062321	y	4	higher	MI	8.29697	8.3844	8.32028	8.57656	8.5761	8.49993	8.7498	8.75638	8.73607	8.44097	8.36189	8.60966
ENSMUSG00000066150	0.149341	0.0711511	0.674713	0.305149	0.523713	0.19567	n	4		MI	7.37647	7.59456	7.56731	7.54324	7.81314	7.76049	7.64125	7.98463	8.01121	7.30307	7.77061	7.68738
ENSMUSG00000070923	0.0256483	0.0472063	0.0556841	0.572913	0.601538	0.355795	n	4		MI	7.58884	7.64665	7.78439	7.92593	8.21954	8.03223	7.93744	8.14536	8.3832	7.8267	7.98869	8.14769
ENSMUSG00000073684	0.0316444	0.0146378	0.0397344	0.171979	0.126093	0.345153	n	4		MI	5.41932	5.37619	5.41932	5.74971	5.8439	5.61839	5.80796	6.02239	5.84525	5.84027	6.0366	6.31514
ENSMUSG00000000085	0.933169	0.309159	0.0659959	0.409388	0.0947313	0.153482	n	4		ME	8.60966	8.31014	8.2087	8.49301	8.07691	8.50879	8.33493	8.20244	8.08525	8.17516	7.91338	7.78055
ENSMUSG00000012126	0.77502	0.630103	0.400996	0.437075	0.549135	0.199911	n	4		ME	10.8364	10.4921	10.4418	10.8607	10.4625	10.6033	10.7179	10.4438	10.3488	10.982	10.6241	10.6431
ENSMUSG00000025413	0.000467413	0.012113	0.000572778	0.557434	0.0142996	0.0497856	n	4		ME	9.71809	9.76339	9.65379	9.16244	9.2076	9.23004	8.98362	9.26642	9.17401	8.95078	8.8204	8.7676
ENSMUSG00000028212	0.247607	0.349937	0.836886	0.808497	0.132067	0.219994	n	4		ME	7.99691	8.34318	8.56691	8.35637	8.67943	8.70184	8.31419	8.49008	8.7938	7.99874	8.38174	8.38767
ENSMUSG00000028294	0.184962	0.831693	0.0561524	0.222154	0.0250562	0.0717829	n	4		ME	11.8531	11.8133	11.7903	11.7667	11.8133	11.7504	11.8133	11.8798	11.7864	11.8681	11.9571	11.9799
ENSMUSG00000028295	0.549357	0.917947	0.00893882	0.638163	0.0227542	0.00989607	n	4		ME	10.018	10.1167	10.1497	10.108	10.1196	10.1425	10.0513	10.1806	10.071	10.286	10.4087	10.4153
ENSMUSG00000028310	0.56977	0.936855	0.143685	0.756067	0.934879	0.678042	n	4		ME	11.6263	11.6899	11.6755	11.547	11.5985	11.732	11.5068	11.7374	11.727	11.615	11.6031	11.644
ENSMUSG00000028314	0.0805187	0.110795	0.797384	0.638716	0.0880806	0.0887277	n	4		ME	9.86768	9.9868	9.96832	9.4786	9.79371	9.70648	9.29602	9.74224	9.68151	9.78536	9.993	10.1374
ENSMUSG00000028330	0.0940882	0.0839957	0.326106	0.546887	0.0712591	0.0546961	n	4		ME	11.1128	11.0835	11.0337	10.9768	10.9074	10.7346	10.9046	11.0285	10.8607	11.1023	11.0813	11.1494
ENSMUSG00000028391	0.737627	0.499101	0.547611	0.449384	0.957935	0.237759	n	4		ME	10.3508	10.2605	10.2657	10.386	10.354	10.206	10.279	10.3031	10.1993	10.3712	10.31	10.2754
ENSMUSG00000028392	0.85134	0.347142	0.564891	0.541334	0.71946	0.844826	n	4		ME	11.3647	11.0641	11.0355	11.3415	10.8046	11.2018	11.2258	10.8076	10.9031	11.3711	10.8076	10.894
ENSMUSG00000028420	0.677373	0.171006	0.128712	0.310142	0.214495	0.512044	n	4		ME	8.03516	8.16542	8.21547	7.98961	8.16326	8.15786	8.03046	8.03677	8.0134	8.09367	7.96417	7.8666
ENSMUSG00000028439	0.0682315	0.219489	0.167262	0.556954	0.0303289	0.0966454	n	4		ME	8.06517	8.09126	8.19555	7.88981	8.02318	8.00748	7.61884	8.10271	7.89994	8.20597	8.17045	8.3832
ENSMUSG00000028458	0.566327	0.17532	0.256307	0.509718	0.469216	0.804087	n	4		ME	11.9141	11.6193	11.5672	11.7864	11.2258	11.6983	11.6564	11.1808	11.3896	11.8013	11.0907	11.1165
ENSMUSG00000028467	0.993165	0.667401	0.0380726	0.681912	0.0458701	0.0443366	n	4		ME	9.02321	8.68536	8.66849	9.00668	8.57191	8.7938	8.9896	8.63404	8.49127	9.36024	9.06857	9.33202
ENSMUSG00000028484	0.264227	0.38426	0.0305391	0.0969875	0.0974347	0.024605	n	4		ME	11.0026	11.1819	11.1901	10.8895	11.0324	11.1078	11.1266	11.1666	11.3556	10.798	10.8289	10.87
ENSMUSG00000028551	0.195121	0.296547	0.244473	0.893044	0.788358	0.725305	n	4		ME	10.4385	10.3466	10.2401	10.56	10.3697	10.4659	10.5933	10.4	10.3634	10.6409	10.3211	10.5286
ENSMUSG00000028560	0.205153	0.184259	0.237633	0.940799	0.943034	0.887188	n	4		ME	11.4368	11.4829	11.4368	11.3011	11.3333	11.4595	11.336	11.3188	11.4545	11.4714	11.3153	11.2902
ENSMUSG00000028576	0.000713216	0.00200895	0.00185843	0.122189	0.0313746	0.0948705	n	4		ME	10.999	11.0531	11.0247	11.2799	11.3033	11.2799	11.3524	11.3153	11.4166	11.4368	11.4166	11.5272
ENSMUSG00000028610	0.728958	0.61023	0.412712	0.3016	0.441348	0.154559	n	4		ME	11.3953	10.8519	10.8183	11.2657	10.9768	11.0593	11.088	10.982	10.598	11.4466	11.0247	11.2172
ENSMUSG00000028637	0.217375	0.0364247	0.00928686	0.205537	0.0207281	0.0626313	n	4		ME	9.78438	9.88553	9.89395	9.85326	9.96532	9.97962	9.94227	10.071	10.0361	10.0944	10.279	10.2013
ENSMUSG00000028681	0.0391968	0.00151447	0.086994	0.0155172	0.304674	0.00489515	y	4	lower	ME	6.72055	6.52349	6.6524	6.34438	6.39574	6.39191	5.91933	6.10666	6.0265	6.5586	6.42215	6.37568
ENSMUSG00000028689	0.00572355	0.254022	0.000480474	0.00669344	0.0044992	0.00228621	y	4	lower	ME	7.9553	8.04177	7.98792	8.20428	8.13878	8.22336	7.94039	7.97095	7.9553	8.42749	8.47125	8.36719
ENSMUSG00000028693	0.364693	0.397063	0.490166	0.517425	0.713896	0.552897	n	4		ME	11.5639	11.6263	11.5776	11.4643	11.6411	11.4418	11.5506	11.5985	11.547	11.6031	11.6336	11.073
ENSMUSG00000028730	0.114865	0.554547	0.0923532	0.138493	0.298263	0.0586145	n	4		ME	9.4657	9.43876	9.43001	9.59652	9.55065	9.47049	9.45316	9.47121	9.28266	9.54099	9.59544	9.74586
ENSMUSG00000028793	0.91372	0.397163	0.662223	0.559287	0.774073	0.790918	n	4		ME	11.4418	11.1701	11.0853	11.3629	10.8842	11.3819	11.2868	10.875	11.0795	11.369	10.8183	11.2281
ENSMUSG00000028845	0.145666	0.00123667	0.0991723	0.379832	0.0238692	0.0254184	n	4		ME	11.4918	11.4595	11.488	11.3754	11.3647	11.4714	11.3784	11.3524	11.3667	11.5293	11.5734	11.6608
ENSMUSG00000028863	0.256539	0.0514817	0.00152292	0.237715	0.00760344	0.00223456	n	4		ME	9.33253	9.34051	9.30663	9.23394	9.34304	9.19056	9.11915	9.24913	9.14851	9.6136	9.6296	9.56041
ENSMUSG00000028937	0.426949	0.259235	0.461745	0.813919	0.779206	0.873788	n	4		ME	11.7757	11.6336	11.5877	11.6649	11.4569	11.644	11.6362	11.476	11.5917	11.6948	11.2815	11.6539
ENSMUSG00000028976	0.237588	0.0750278	0.494646	0.599456	0.345217	0.123753	n	4		ME	11.4974	11.4466	11.3819	11.4595	11.3011	11.2348	11.3727	11.2868	11.1901	11.4166	11.4368	11.3867
ENSMUSG00000028992	0.575299	0.046198	0.0760076	0.0247952	0.264091	0.0127604	y	4	lower	ME	8.33308	8.31908	8.28034	8.29483	8.41663	8.30221	8.06334	8.20149	8.0299	8.34752	8.40895	8.45395
ENSMUSG00000029003	0.105223	0.548757	0.0950511	0.92916	0.0560819	0.100361	n	4		ME	10.8995	10.8541	10.87	10.935	10.9095	10.8926	10.8914	11.0355	10.8289	10.8076	10.7851	10.6699
ENSMUSG00000029020	0.177074	0.0986142	0.209711	0.542009	0.803907	0.396775	n	4		ME	10.3141	10.0606	10.0295	10.0724	9.82696	9.93509	10.0295	9.83644	9.7507	10.0513	9.85627	10.0002
ENSMUSG00000029073	0.662978	0.140803	0.022428	0.409233	0.0407528	0.00826603	n	4		ME	10.0468	10.0794	10.1339	10.0484	10.1539	9.97342	9.94035	10.0724	9.98091	10.2534	10.3249	10.1984
ENSMUSG00000034171	0.0423279	0.00396679	0.142285	0.10404	0.273876	0.456318	n	4		ME	7.83488	7.74626	7.63063	7.54214	7.30448	7.50899	7.31381	7.28357	7.17861	7.42721	7.12373	6.28715
ENSMUSG00000035126	0.998739	0.548976	0.178408	0.613476	0.306379	0.187841	n	4		ME	8.82399	8.83307	8.80009	8.71433	9.00534	8.73698	8.51933	8.88819	8.809	8.96264	9.07007	8.83545
ENSMUSG00000035517	0.00393684	0.202222	0.0224125	0.278536	0.0414388	0.996659	n	4		ME	11.5776	11.5701	11.5447	11.2993	11.3511	11.3754	11.3153	11.4595	11.5447	11.4595	11.4673	11.3917
ENSMUSG00000035601	0.216914	0.194483	0.0426945	0.941725	0.188019	0.203809	n	4		ME	8.83356	8.97028	9.03633	8.64438	8.9184	8.82933	8.62978	8.88763	8.84815	8.43715	8.62031	8.75263
ENSMUSG00000037366	0.0457019	0.162489	0.706521	0.313517	0.0330557	0.129653	n	4		ME	8.42259	8.55295	8.39935	8.13426	8.18609	7.8446	8.14087	8.44918	8.10271	8.40214	8.42796	8.6632
ENSMUSG00000037443	0.353427	0.120319	0.0261776	0.787132	0.555815	0.638072	n	4		ME	9.1936	9.12421	9.03976	9.44988	9.15422	9.12896	9.40952	9.22679	9.20362	9.35665	9.25622	9.34051
ENSMUSG00000037752	0.213373	0.0913804	0.43972	0.39209	0.700464	0.295804	n	4		ME	9.93797	9.82132	9.71353	9.80802	9.64149	9.64437	9.69949	9.66335	9.47121	9.89121	9.67564	9.64568
ENSMUSG00000038172	0.00375288	0.244181	0.0013843	0.0953224	0.00616756	0.0207475	n	4		ME	6.01118	5.86691	5.92133	6.25841	6.34057	6.22336	5.94864	6.21104	6.02239	6.52179	6.57672	6.51795
ENSMUSG00000038827	0.300582	0.726785	0.158752	0.693993	0.268311	0.208217	n	4		ME	7.24314	7.36912	7.32659	7.35389	7.54023	7.32833	7.18836	7.54023	7.33735	7.36384	7.65659	7.87997
ENSMUSG00000039298	0.232678	0.0404094	0.380741	0.0599762	0.498023	0.704227	n	4		ME	8.98242	8.70117	8.5981	8.65575	8.48049	8.57123	8.46741	8.27562	8.21879	8.77828	8.58777	6.73882
ENSMUSG00000039634	0.0564008	0.0666486	0.789779	0.739766	0.0371116	0.0441456	n	4		ME	7.23038	7.31381	7.31782	6.72315	7.08826	6.80173	6.54829	7.00924	6.86734	7.17315	7.30232	7.4663
ENSMUSG00000039936	0.989822	0.311843	0.574601	0.342312	0.573534	0.662583	n	4		ME	7.61468	7.25333	7.12144	7.55335	7.0158	7.42924	7.26666	7.08764	7.03531	8.0029	7.47771	3.99561
ENSMUSG00000040359	0.530653	0.678557	0.0884255	0.879331	0.177019	0.165088	n	4		ME	8.18847	8.44693	8.46911	8.24846	8.61509	8.53695	8.20698	8.4561	8.65439	8.50742	8.79203	8.99307
ENSMUSG00000041241	0.0575602	0.00740594	0.0123305	0.0386749	0.000857246	0.00210394	y	4	lower	ME	8.13756	8.12757	8.02558	7.97292	8.01253	7.94434	7.87375	7.73619	7.72444	8.25765	8.34846	8.29609
ENSMUSG00000042616	0.0511918	0.010257	0.228606	0.943102	0.763976	0.781971	n	4		ME	11.6809	11.6649	11.6491	11.6071	11.5151	11.5701	11.5406	11.5949	11.5639	11.5789	11.4998	11.6682
ENSMUSG00000042707	0.014299	0.00512553	0.0347827	0.322448	0.278839	0.0566192	n	4		ME	10.4256	10.4129	10.3389	10.285	10.2198	10.1916	10.1618	10.2332	10.1822	10.3112	10.2313	10.2918
ENSMUSG00000043621	0.277995	0.160682	0.160814	0.995404	0.0789693	0.0413179	n	4		ME	9.73076	9.65574	9.61154	9.57904	9.1872	9.62293	9.53252	9.26977	9.58376	10.0476	9.69949	9.88425
ENSMUSG00000045573	0.235224	0.217208	0.165826	0.794412	0.549999	0.737032	n	4		ME	10.4708	10.2109	10.206	10.2275	10.1137	10.1125	10.2605	10.1167	10.0056	10.258	9.9691	10.0316
ENSMUSG00000053730	0.986595	0.899722	0.314148	0.908268	0.348729	0.296502	n	4		ME	9.79752	9.60444	9.4879	9.77639	9.33846	9.78438	9.84332	9.44622	9.5396	10.3064	9.72629	9.6737
ENSMUSG00000059939	0.0765638	0.0401852	0.292719	0.552041	0.0418046	0.0102177	n	4		ME	7.62681	7.75062	7.55068	7.53986	7.21237	7.24785	7.33065	7.50243	7.39884	7.63706	7.76854	7.8039
ENSMUSG00000061298	0.0482881	0.00856247	0.481107	0.0633773	0.167014	0.0217895	n	4		ME	9.13024	9.24135	9.31364	8.96785	9.05527	9.08789	8.76705	8.95688	8.85602	9.05084	9.26453	9.17889
ENSMUSG00000061322	0.0175254	0.0689162	0.679318	0.314849	0.0342817	0.0429807	n	4		ME	9.13416	9.05907	9.08069	8.92434	8.87074	8.77541	8.78158	8.85461	8.49375	9.18279	9.19549	8.99256
ENSMUSG00000061455	0.00210003	0.000580115	0.000512547	0.0249124	0.0202987	0.488974	y	4	lower	ME	7.61084	7.69067	7.69486	7.36303	7.39418	7.42592	7.19704	7.29819	7.27149	7.28053	7.32498	7.24785
ENSMUSG00000069733	0.00477786	0.361258	0.00479121	0.190965	0.0384	0.016667	n	4		ME	9.75576	9.6947	9.73224	9.93157	9.91927	9.91233	9.92401	9.7507	9.72705	10.1794	10.0411	10.1488
ENSMUSG00000070806	0.00853411	0.0370163	0.00765181	0.563471	0.0793081	0.201389	n	4		ME	9.20362	9.39326	9.45213	8.7464	8.84534	8.868	8.44508	8.98468	8.70606	8.12477	8.52219	8.53943
ENSMUSG00000070980	0.705728	0.257537	0.361619	0.453653	0.477042	0.760629	n	4		ME	12.2793	12.0488	12.0237	12.2424	11.9952	11.9693	12.0978	11.9693	11.8637	12.1227	12.041	11.5837
ENSMUSG00000073791	0.303202	0.0591393	0.0559748	0.271419	0.172096	0.624962	n	4		ME	8.74469	8.86512	8.96178	8.80545	9.12896	9.06213	8.98567	9.24016	9.29549	9.02217	9.34827	9.39022
ENSMUSG00000078708	0.00047557	0.0044569	0.00482688	0.114452	0.0239715	0.00853102	n	4		ME	7.9327	7.91826	7.84169	8.34318	8.39935	8.35824	8.17239	8.32555	8.26569	8.82399	8.83189	9.10647
ENSMUSG00000001089	0.302098	0.120632	0.223616	0.260896	0.267047	0.376836	n	4			7.94733	8.01465	8.05202	7.71424	7.77897	8.07025	7.77897	7.27413	7.73013	7.65283	7.35295	5.51094
ENSMUSG00000003644	0.00120479	0.425847	0.140207	0.0224408	0.00264774	0.862596	n	4			7.79429	7.51579	7.67989	8.79013	8.58119	8.50706	8.15343	7.70529	7.63372	7.77649	7.80631	8.01121
ENSMUSG00000003810	0.0305593	0.0580885	0.0158642	0.176559	0.569821	0.0369825	n	4			9.51208	9.46678	9.39511	9.32298	9.1411	9.24135	9.30996	9.39685	9.31219	9.20156	9.19187	9.20558
ENSMUSG00000006392	0.117071	0.915368	0.11838	0.250893	0.0495847	0.328695	n	4			9.62293	9.54473	9.49747	9.37633	9.52482	9.33403	9.55226	9.67781	9.40479	9.619	9.66108	9.65739
ENSMUSG00000006398	0.17343	0.0501745	0.073501	0.468899	0.64083	0.759065	n	4			11.1689	11.0755	11.0051	11.2465	11.2709	11.0947	11.2154	11.3436	11.2204	11.2902	11.2775	11.1516
ENSMUSG00000006586	0.945672	0.0507873	0.000154388	0.0809091	0.0113681	0.0124637	n	4			6.3489	6.33574	6.37568	6.37785	6.12425	6.58932	6.70372	6.62937	6.95213	7.4416	7.53212	7.44254
ENSMUSG00000007613	0.197076	0.375756	0.399595	0.68631	0.848828	0.891515	n	4			7.41261	7.62172	7.57794	7.54597	7.73445	7.76854	7.51694	7.61404	7.78236	7.45296	7.70875	7.80921
ENSMUSG00000008305	0.194473	0.0420312	0.0254576	0.33548	0.171476	0.479014	n	4			6.90939	7.19279	7.14244	7.11237	7.29504	7.44544	7.37189	7.32878	7.53986	7.44737	7.38508	7.64839
ENSMUSG00000009640	0.144755	0.00196759	0.000550138	0.166142	0.0395498	0.0269273	n	4			9.36247	9.26389	9.29549	9.5883	9.41057	9.36897	9.59356	9.63138	9.56041	9.78649	9.70854	9.68806
ENSMUSG00000009863	0.0108087	0.0145446	0.0943327	0.0743912	0.993811	0.104848	n	4			10.6847	10.6832	10.745	10.87	10.8302	10.8002	10.8806	11.0167	11.0105	10.7737	10.8013	10.9267
ENSMUSG00000010517	0.170338	0.353256	0.175381	0.0818615	0.944599	0.0846771	n	4			9.88974	9.83372	9.85841	10.0115	9.86255	10.0201	9.88778	9.73076	9.79895	10.0316	9.86472	9.98203
ENSMUSG00000012117	0.0312047	0.18804	0.117777	0.208654	0.304378	0.174658	n	4			5.8701	5.84525	5.89802	5.95211	5.97792	6.04673	5.8701	5.97223	5.94682	6.19407	6.24864	5.93276
ENSMUSG00000015243	0.00989803	0.952741	0.128178	0.0690214	0.227458	0.121874	n	4			8.16427	8.19083	8.2474	8.05988	8.06638	8.01763	8.23238	8.11195	8.26847	7.3458	7.7566	8.0245
ENSMUSG00000017264	0.446667	0.0507855	0.971046	0.538317	0.515543	0.153243	n	4			9.37633	9.37206	9.34532	9.28644	9.06625	9.43726	9.26817	9.11479	9.16062	9.45158	9.1936	9.43818
ENSMUSG00000023571	0.306071	0.171693	0.563221	0.0626311	0.173163	0.360793	n	4			6.39759	6.20339	6.0817	6.23233	6.09	5.83513	6.65812	6.57174	6.24527	6.33574	6.11839	6.50144
ENSMUSG00000025328	0.934081	0.872857	0.0260622	0.974174	0.0203317	0.0291831	n	4			6.79918	6.72152	6.58407	6.83532	6.5085	6.73027	6.68992	6.59398	6.77862	6.08658	5.72772	5.44823
ENSMUSG00000028207	0.448904	0.026767	0.0788944	0.0302253	0.110829	0.00699078	y	4	lower		5.03106	5.02753	5.00017	4.84525	4.95399	5.07407	4.73522	4.70283	4.53106	5.06445	5.12872	5.18059
ENSMUSG00000028248	0.00631712	0.377217	0.626195	0.0653719	0.065535	0.649183	n	4			6.68883	6.83532	6.74591	6.39049	6.42215	6.46626	6.67059	6.92012	7.13236	6.69752	6.72511	7.04399
ENSMUSG00000028252	0.281386	0.518677	0.0861603	0.263422	0.131046	0.0514584	n	4			5.48705	5.60886	5.54172	5.52033	5.76807	5.66603	5.16705	5.62578	5.51884	5.76714	5.94572	6.27198
ENSMUSG00000028274	0.484732	0.209354	0.8821	0.021983	0.449818	0.0737565	n	4			6.51105	6.76573	6.7939	6.67492	6.79599	6.84416	6.46894	6.60888	6.51105	6.5959	6.73532	6.79074
ENSMUSG00000028284	0.000923675	0.0474534	0.000501187	0.848121	0.00436477	0.0117679	n	4			6.99223	6.90261	6.90773	7.24605	7.29237	7.31985	7.24127	7.13465	7.42592	7.71907	7.73013	7.87512
ENSMUSG00000028291	0.490516	0.286011	0.992302	0.544086	0.495099	0.285824	n	4			11.3214	11.4418	11.3867	11.4166	11.3436	11.5579	11.5293	11.3491	11.6608	11.4608	11.3415	11.3461
ENSMUSG00000028300	0.0519652	0.0341074	0.284573	0.848741	0.650178	0.566041	n	4			7.54371	7.62803	7.72098	7.80785	7.92963	7.75423	7.7949	7.84169	7.89178	7.58819	7.8147	7.92162
ENSMUSG00000028312	0.0777566	0.693414	0.107079	0.175328	0.022152	0.321037	n	4			6.6955	6.79074	6.77388	6.51795	6.6981	6.56019	6.5924	6.88625	6.92857	6.79971	7.02191	7.03418
ENSMUSG00000028318	0.0403412	0.0961225	0.111182	0.898073	0.253694	0.366918	n	4			6.40014	6.68037	6.63927	6.02501	6.33211	6.23355	5.87914	6.35613	6.28334	6.22035	6.39961	6.42148
ENSMUSG00000028322	0.169498	0.10536	0.0951814	0.303147	0.608556	0.479321	n	4			9.16457	9.3283	9.23846	9.08245	9.21566	8.93283	8.71362	9.15245	8.78447	8.86512	9.00605	9.16244
ENSMUSG00000028331	0.0229377	0.566737	0.00625516	0.255348	0.0239725	0.0493921	n	4			7.32721	7.31448	7.37503	7.63895	7.76592	7.56823	7.38557	7.70317	7.21861	7.84689	8.06206	7.97033
ENSMUSG00000028343	0.0684057	0.165202	0.0656892	0.833026	0.205353	0.182639	n	4			8.34752	8.42006	8.43715	8.44508	8.51232	8.51791	8.40707	8.51742	8.52072	8.51598	8.57235	8.72489
ENSMUSG00000028345	0.918249	0.274764	0.430823	0.262443	0.507219	0.118045	n	4			10.3516	10.5257	10.5198	10.3622	10.5801	10.4265	10.4543	10.5917	10.695	10.2667	10.496	10.4034
ENSMUSG00000028381	0.0480639	0.0120236	0.0039362	0.36401	0.00910048	0.0141996	n	4			6.3898	6.39475	6.34057	6.15465	6.10073	6.27342	6.07039	6.06745	6.18995	5.92749	5.8439	5.76154
ENSMUSG00000028394	0.0158658	0.0113096	0.869573	0.386572	0.120197	0.0934904	n	4			9.16671	9.25227	9.2288	9.36721	9.37145	9.3266	9.39326	9.34755	9.38229	9.17559	9.17401	9.329
ENSMUSG00000028398	0.28768	0.219996	0.23883	0.83911	0.0953181	0.0753772	n	4			9.37772	9.36968	9.41362	9.52919	9.55782	9.35108	9.4397	9.62765	9.43001	9.14478	9.29018	9.38332
ENSMUSG00000028409	0.0287245	0.0313677	0.0118144	0.341463	0.0489447	0.178091	n	4			9.14759	9.25016	9.18189	9.35202	9.49356	9.35065	9.38503	9.61261	9.46678	9.51535	9.66751	9.7496
ENSMUSG00000028416	0.0433932	0.127791	0.0231541	0.381667	0.100181	0.0911472	n	4			11.7931	11.7829	11.6846	11.9212	11.8531	11.8752	11.9029	11.7903	11.8408	11.9604	11.9169	11.9324
ENSMUSG00000028426	0.622415	0.36762	0.235331	0.607134	0.57934	0.922311	n	4			11.1329	10.8154	10.7851	11.0285	10.4351	10.9221	11.0127	10.1768	10.6847	10.9379	10.5562	10.4694
ENSMUSG00000028433	0.264186	0.351016	0.142721	0.984858	0.441005	0.46523	n	4			10.0826	10.0002	9.91121	10.2918	9.96759	10.1734	10.361	9.96016	10.1025	10.5213	10.0944	10.2252
ENSMUSG00000028437	0.00292074	0.308627	0.0205359	0.018271	0.60346	0.0339443	y	4	intermediate		9.2282	9.22233	9.1332	8.91905	8.88763	8.97513	9.12421	9.2096	9.06941	8.94603	8.95222	8.76873
ENSMUSG00000028443	0.331228	0.775169	0.104238	0.337576	0.244662	0.124173	n	4			7.42533	7.25736	7.2018	7.29634	7.39725	7.47393	7.305	7.39027	7.2612	7.42212	7.47579	7.72045
ENSMUSG00000028447	0.0621892	0.649571	0.0238069	0.257313	0.144098	0.110039	n	4			10.3752	10.2375	10.2071	10.1753	10.0583	10.0794	10.1906	10.3769	10.1125	10.0043	9.99056	10.0724
ENSMUSG00000028454	0.085496	0.310207	0.214838	0.666811	0.271229	0.713072	n	4			8.52631	8.53	8.50637	8.30292	8.44097	8.22776	8.29055	8.5882	8.26437	8.32555	8.46365	8.49509
ENSMUSG00000028468	0.678753	0.64641	0.243438	0.979199	0.381368	0.35135	n	4			8.15998	7.94434	7.90585	8.16149	7.8147	8.24212	8.1498	8.19149	7.86308	8.26275	7.99939	8.61904
ENSMUSG00000028483	0.0792719	0.29712	0.0315106	0.103246	0.0196912	0.0975687	n	4			6.42215	6.51555	6.54888	6.31891	6.4092	6.41151	6.45389	6.64814	6.76241	6.76057	6.85906	7.06256
ENSMUSG00000028496	0.00365061	0.152211	0.845949	0.100998	0.33492	0.708851	n	4			5.65977	5.62419	5.72882	5.94864	5.9439	5.88123	5.88845	5.74503	5.71996	5.39592	5.74503	5.98614
ENSMUSG00000028525	0.15248	0.332552	0.113561	0.183412	0.0569177	0.625193	n	4			6.86734	6.82967	6.89988	6.92012	6.88556	6.98577	6.84416	6.55496	6.8366	6.71592	6.54562	6.78471
ENSMUSG00000028527	0.0306613	0.223508	0.0253039	0.160935	0.0940529	0.0269392	n	4			5.50142	5.56932	5.52033	5.84251	5.98354	5.75258	5.73273	5.77926	5.50913	5.96441	6.16042	6.33797
ENSMUSG00000028545	0.017832	0.221344	0.000450588	0.0167201	0.00486202	0.000116076	y	4	intermediate		6.72511	6.64201	6.74954	7.28407	7.36067	7.66061	6.78865	6.92564	6.71892	8.28414	8.22776	8.47125
ENSMUSG00000028550	0.168839	0.233017	0.0267075	0.742925	0.0310754	0.05743	n	4			6.62744	6.62529	6.68883	6.76296	6.66738	6.87121	6.84039	6.62744	6.95386	7.09	7.04592	7.34499
ENSMUSG00000028552	0.209861	0.031992	0.175458	0.172223	0.768574	0.290841	n	4			9.25768	9.35065	9.40583	9.33649	9.61154	9.49603	9.51463	9.71259	9.77099	9.33929	9.63674	9.58283
ENSMUSG00000028559	0.509527	0.528856	0.59724	0.32763	0.364743	0.82579	n	4			9.62367	9.72763	9.73416	9.55226	9.7803	9.5694	9.67234	9.72364	9.79279	9.57369	9.83372	9.85167
ENSMUSG00000028567	0.0191395	0.00682787	0.000803724	0.254576	0.0834445	0.420709	n	4			9.05835	9.19139	9.15081	9.4315	9.68275	9.48308	9.56775	9.81314	9.63835	9.65379	9.80916	9.79752
ENSMUSG00000028577	0.0624813	0.0538528	0.0407704	0.175183	0.335973	0.447576	n	4			7.66278	7.67914	7.72379	7.74058	7.8566	7.86272	7.99818	7.82512	8.06434	7.8666	7.81815	7.98199
ENSMUSG00000028578	0.714493	0.844699	0.681312	0.652944	0.90301	0.61907	n	4			5.99754	6.33128	6.26509	5.92749	6.28831	6.20229	5.97056	6.18269	6.56985	5.82763	6.15005	6.3657
ENSMUSG00000028580	0.594576	0.949486	0.716714	0.809095	0.560537	0.714612	n	4			9.01499	8.82184	8.78805	8.96872	8.83307	8.97086	9.12797	8.65575	8.87288	9.13579	8.7498	8.49808
ENSMUSG00000028607	0.0122517	0.0841832	0.0727804	0.378897	0.827662	0.444216	n	4			9.55226	9.70648	9.67564	9.29388	9.3502	9.35445	9.27084	9.4565	9.53483	9.10743	9.32575	9.4837
ENSMUSG00000028613	0.149293	0.360347	0.985223	0.100949	0.299016	0.452672	n	4			7.34702	7.32659	7.23485	7.12069	7.21284	7.27196	7.343	7.29442	7.52447	7.25281	7.2156	7.44483
ENSMUSG00000028614	0.403689	0.267393	0.0711164	0.838651	0.470142	0.569639	n	4			7.91471	8.08268	7.94681	7.76007	7.87947	8.03453	7.74183	7.88132	7.98199	7.79292	7.8666	7.80169
ENSMUSG00000028617	0.648469	0.165039	0.0551	0.217535	0.0767586	0.637733	n	4			8.47179	8.71564	8.72704	8.57063	8.75761	8.73841	8.74041	8.88253	9.27084	8.83752	9.09499	9.27156
ENSMUSG00000028619	0.00143709	0.0010615	0.00649178	0.00501366	0.0725167	0.00235937	y	4	lower		6.72221	6.65412	6.73456	6.45016	6.40363	6.3517	5.93276	6.09703	6.03728	6.5357	6.44272	6.52287
ENSMUSG00000028622	0.0912724	0.0691716	0.520109	0.58446	0.0707155	0.107514	n	4			9.58669	9.38814	9.35108	9.71098	9.66108	9.56041	9.73827	9.79279	9.55467	9.52556	9.4903	9.48063
ENSMUSG00000028643	0.234286	0.602554	0.0492698	0.685819	0.160044	0.210293	n	4			10.598	10.4418	10.5315	10.6147	10.6543	10.5415	10.6241	10.6494	10.4366	10.6902	10.6252	10.7579
ENSMUSG00000028646	0.672166	0.642036	0.184388	0.955962	0.287762	0.249567	n	4			8.9251	8.9425	8.82679	8.88187	8.93689	8.80321	8.87179	8.91652	8.84162	8.79802	8.69692	8.88128
ENSMUSG00000028648	0.145307	0.115283	0.873309	0.472568	0.483451	0.273934	n	4			10.0499	9.96232	10.0459	9.79182	9.98203	9.91585	9.71692	9.97563	9.76339	9.82246	9.96016	10.2126
ENSMUSG00000028656	0.336663	0.596892	0.0620272	0.193527	0.0513133	0.0470478	n	4			9.92806	10.1452	10.0944	9.94864	9.96232	10.0103	9.97563	10.135	10.2263	9.81216	9.91585	9.79895
ENSMUSG00000028668	0.374692	0.65356	0.140218	0.5922	0.64033	0.263713	n	4			7.35856	7.1826	7.22419	7.37062	7.20973	7.45695	7.35856	7.18176	7.33679	7.48807	7.31245	7.3725
ENSMUSG00000028669	0.249974	0.212695	0.00545139	0.818577	0.0136047	0.016637	n	4			9.33202	9.34476	9.3032	9.35831	9.41504	9.3283	9.36555	9.43001	9.33403	9.21868	9.19769	9.24731
ENSMUSG00000028673	0.902952	0.646231	0.0430486	0.559758	0.0475264	0.0251027	n	4			9.17401	9.40843	9.44106	9.18189	9.46678	9.329	9.24253	9.45316	9.49946	8.90878	9.16125	8.89941
ENSMUSG00000028688	0.0884928	0.0315838	0.428194	0.264262	0.785205	0.943443	n	4			8.14645	8.04377	7.98349	7.97415	7.84364	7.93777	7.8169	7.92963	7.76444	8.14156	7.96592	7.45385
ENSMUSG00000028690	0.0186131	0.0104984	0.0758587	0.540884	0.749814	0.913698	n	4			6.76472	6.89434	7.03982	6.4676	6.50616	6.39308	6.38836	6.51196	6.34438	6.30448	6.1593	6.71785
ENSMUSG00000028691	0.101223	0.0112981	0.180209	0.0381962	0.522344	0.0132184	y	4	higher		9.43876	9.85481	9.82132	9.99763	10.2872	9.93659	10.3828	10.4601	10.6621	9.82043	9.9665	10.1364
ENSMUSG00000028696	0.058744	0.248441	0.764619	0.0848226	0.647208	0.323127	n	4			7.26358	7.35198	7.31166	7.26189	7.21028	7.19001	7.49541	7.28534	7.45218	7.34421	7.07783	7.40108
ENSMUSG00000028698	0.0224997	0.06897	0.275354	0.818449	0.0422429	0.154531	n	4			8.85093	8.94165	8.8255	9.04661	9.07347	8.99846	9.01234	8.98242	9.17157	8.97862	8.93283	8.87968
ENSMUSG00000028703	0.337928	0.00638899	0.591178	0.196102	0.509734	0.407519	n	4			10.0436	10.1012	10.0476	10.1743	10.2275	10.0218	10.204	10.2667	10.2965	10.2137	10.2595	8.8234
ENSMUSG00000028708	0.101116	0.340914	0.432525	0.841617	0.847646	0.760518	n	4			7.99269	7.98129	7.98869	7.95213	7.91718	7.8585	7.95882	7.97859	7.73552	8.00876	7.96742	7.79634
ENSMUSG00000028718	0.599515	0.997	0.0273188	0.714177	0.0393113	0.0401088	n	4			7.75062	7.8842	7.81979	7.69367	8.06481	7.9008	7.57971	8.04177	7.83488	8.1444	8.50706	8.37212
ENSMUSG00000028729	0.38509	0.400662	0.400914	0.878843	0.2891	0.268455	n	4			9.11634	9.11634	9.11634	9.11341	9.2288	9.12718	9.09749	9.25622	9.14478	8.83686	8.95078	9.21046
ENSMUSG00000028743	0.103241	0.0401166	0.019644	0.67179	0.0173417	0.0254368	n	4			8.65033	8.66532	8.67416	8.98103	8.82854	8.75263	8.983	8.87772	8.81593	9.60912	9.33046	9.263
ENSMUSG00000028745	0.0620359	0.564133	0.0548823	0.0499162	0.600924	0.0665136	n	4			10.8733	10.9174	10.8995	10.9633	10.9267	10.9963	10.8687	10.9221	10.8519	10.9514	10.9706	10.9221
ENSMUSG00000028750	0.029784	0.327689	0.0297335	0.0139739	0.0914536	0.0146635	y	4	lower		8.70117	8.75501	8.7718	8.89313	9.04256	8.91777	8.69129	8.75831	8.60897	9.18432	9.34532	9.04416
ENSMUSG00000028756	0.000254133	0.00674719	0.00075537	0.965797	0.0100119	0.00460444	n	4			8.93421	8.95473	8.99597	9.45316	9.44392	9.47121	9.35202	9.49603	9.52815	9.89613	9.78649	9.94035
ENSMUSG00000028757	0.0565084	0.0298495	0.674742	0.102395	0.493031	0.142887	n	4			10.0043	9.9665	10.0149	10.2446	10.081	10.2082	10.4278	10.2252	10.4438	10.3057	10.0468	9.83303
ENSMUSG00000028760	0.406223	0.0861522	0.390309	0.367181	0.165358	0.0368762	n	4			9.70486	9.55144	9.53778	9.59356	9.3634	9.57904	9.53438	9.36555	9.34222	9.70648	9.56041	9.75785
ENSMUSG00000028763	0.949645	0.27257	0.488016	0.268338	0.473747	0.17159	n	4			6.9034	7.04497	7.24658	7.02652	7.08764	7.10243	7.14873	6.6326	6.24476	7.42258	7.28915	6.90939
ENSMUSG00000028766	0.0780343	0.0358306	0.359778	0.60032	0.342083	0.177547	n	4			6.0326	6.06575	5.76807	5.82322	5.54327	5.44076	5.7099	5.35017	5.48243	6.04431	5.63157	5.68939
ENSMUSG00000028779	0.00171189	0.237054	0.830869	0.350569	0.311835	0.481884	n	4			8.35971	8.4155	8.3871	8.55438	8.55047	8.58229	8.39381	8.60323	8.46823	8.54551	8.46741	8.03302
ENSMUSG00000028792	0.509378	0.539855	0.692782	0.95685	0.448218	0.446843	n	4			10.4351	10.2509	10.1656	10.5213	10.2534	10.3222	10.5801	10.3124	10.2275	10.5044	10.1794	9.92401
ENSMUSG00000028796	0.00766793	0.0368117	0.0891622	0.0496397	0.0191453	0.0406178	y	4	intermediate		8.59999	8.43002	8.48112	8.22197	8.10777	8.17045	8.30938	8.29531	8.24939	8.37902	8.34485	8.33834
ENSMUSG00000028797	0.698814	0.984054	0.0425023	0.773986	0.0843318	0.116961	n	4			8.23154	7.97906	7.94142	8.2855	7.93907	8.09646	8.31242	8.01069	7.83956	8.46025	8.26393	8.45988
ENSMUSG00000028798	0.171435	0.0129724	0.389297	0.0276173	0.0444454	0.00475911	y	4	higher		10.7245	10.6688	10.75	10.7857	10.772	10.7336	10.8733	10.8644	10.8114	10.6511	10.674	10.7245
ENSMUSG00000028809	0.356991	0.137662	0.778561	0.191369	0.222596	0.0869204	n	4			8.04059	8.31486	8.35236	8.27241	8.44372	8.35112	8.3733	8.49993	8.50389	8.01069	8.27299	8.30221
ENSMUSG00000028811	0.00249437	0.00563908	0.00110944	0.842505	0.0256836	0.021994	n	4			7.53212	7.41261	7.47339	7.83535	7.80222	7.7566	7.87052	7.72251	7.76915	8.11837	7.97859	7.97292
ENSMUSG00000028821	0.120718	0.0979406	0.0586964	0.91958	0.670927	0.574849	n	4			8.61138	8.71278	8.69012	8.76526	8.98468	8.78049	8.81408	8.94661	8.73968	8.77436	8.89166	8.99534
ENSMUSG00000028830	0.057286	0.035003	0.0914752	0.404247	0.687668	0.750634	n	4			9.14297	9.02746	9.01919	8.9196	8.63588	8.79437	8.85223	8.56384	8.58777	8.87074	8.48254	8.80602
ENSMUSG00000028837	0.010578	0.0233985	0.294155	0.56952	0.731876	0.55433	n	4			8.80545	8.91434	8.90947	9.0675	9.16062	9.05907	9.02518	9.18508	9.19947	8.91652	8.93421	9.29018
ENSMUSG00000028840	0.418282	0.045149	0.0120441	0.0204922	0.443277	0.0241906	y	4	lower		6.75286	6.72856	6.68348	6.75038	6.89659	6.69936	6.47972	6.53996	6.31342	6.85906	6.81077	6.84546
ENSMUSG00000028848	0.0866836	0.352037	0.00861414	0.0552903	0.00105108	0.0548832	n	4			7.7109	7.63256	7.76142	7.77954	7.85931	7.78665	7.58819	7.73552	7.58077	7.50388	7.48025	7.40417
ENSMUSG00000028857	0.923634	0.261262	0.100084	0.100398	0.0393249	0.0141737	n	4			8.3369	8.27735	8.13688	8.30544	8.21879	8.20597	8.18282	8.17981	8.1156	8.4833	8.33413	8.4155
ENSMUSG00000028861	0.0769247	0.00579714	0.157256	0.0120075	0.0622904	0.0198767	y	4	lower		8.62115	8.48864	8.52973	8.44097	8.41005	8.41184	8.21954	8.2474	8.30292	8.71876	8.57123	8.83752
ENSMUSG00000028869	0.515106	0.481712	0.0667127	0.986165	0.105659	0.103059	n	4			7.93105	8.08986	8.01644	7.95314	8.13932	8.10187	7.98537	8.05668	8.14819	8.18897	8.22903	8.47631
ENSMUSG00000028873	0.226577	0.332507	0.188149	0.833121	0.829182	0.953402	n	4			9.30232	9.16755	9.11024	9.36432	9.40656	9.18768	9.22679	9.44488	9.21953	9.31919	9.24511	9.34222
ENSMUSG00000028886	0.812165	0.0295927	0.366935	0.0241473	0.496501	0.0249486	y	4	lower		7.60274	7.43547	7.52613	7.62594	7.5223	7.4672	7.36964	7.23751	7.15904	7.59256	7.60427	7.53774
ENSMUSG00000028889	0.121992	0.239296	0.180355	0.768923	0.825449	0.927121	n	4			8.59377	8.85818	8.86103	8.95347	8.89941	9.14851	8.80009	8.92608	9.15359	8.92661	8.84986	9.14297
ENSMUSG00000028896	0.32622	0.121139	0.0739139	0.395572	0.58786	0.620648	n	4			8.56992	8.46025	8.45847	8.4561	8.18432	8.48	8.44693	8.11449	8.15585	8.31968	8.19017	8.40707
ENSMUSG00000028898	0.0265463	0.128915	0.0268129	0.404106	0.0554317	0.0348419	n	4			6.37568	6.45238	6.42422	6.6014	6.5007	6.60402	6.43287	6.56985	6.54983	6.77774	6.79147	7.03802
ENSMUSG00000028899	0.632461	0.348071	0.0677816	0.540976	0.0882519	0.208347	n	4			8.84615	8.9542	8.85461	8.9555	8.97447	8.81891	8.9598	9.11073	8.85764	8.98834	9.16878	9.25622
ENSMUSG00000028901	0.0941685	0.0546071	0.323781	0.292873	0.022958	0.0246723	n	4			5.13161	4.80597	4.87244	4.65969	4.73522	4.59205	4.70283	4.48045	4.24067	5.25531	4.99161	5.00657
ENSMUSG00000028902	0.678949	0.0176504	0.296829	0.110963	0.737151	0.0244176	n	4			9.10164	9.13135	9.16125	9.039	9.18977	9.10006	9.19627	9.25016	9.22043	9.06941	9.14639	9.05617
ENSMUSG00000028907	0.0042124	0.005854	0.0211355	0.0784834	0.625022	0.297948	n	4			7.80921	7.83116	7.79634	8.15515	8.2105	8.27299	8.32106	8.45056	8.29609	8.13024	8.26702	8.36599
ENSMUSG00000028910	0.000208356	0.00396679	0.00101399	0.0644977	0.0126302	0.0912494	n	4			7.17549	7.13112	7.19704	6.69315	6.66037	6.66956	6.40014	6.57413	6.38364	6.21653	6.23844	6.37484
ENSMUSG00000028911	0.717551	0.169908	0.735439	0.132502	0.897095	0.0354178	n	4			9.16878	9.12464	9.01595	9.17782	9.04353	9.00769	9.23531	9.20901	9.14372	9.07517	9.0514	9.12642
ENSMUSG00000028914	0.602856	0.53745	0.321973	0.35577	0.552252	0.206859	n	4			6.19657	6.06304	5.98175	6.27342	5.98505	6.16125	6.19407	5.97792	5.79934	6.43005	6.22336	6.04097
ENSMUSG00000028920	0.210978	0.00956452	0.0372551	0.0864523	0.349572	0.192242	n	4			6.61995	6.76788	6.79147	6.51105	6.53305	6.7334	6.29972	6.43611	6.43873	6.52813	6.56895	6.40014
ENSMUSG00000028923	0.0436339	0.0169465	0.140352	0.284726	0.318485	0.501281	n	4			7.96984	7.83693	7.8666	7.78665	7.69004	7.60648	7.65865	7.65329	7.48622	7.67861	7.58476	7.05486
ENSMUSG00000028964	0.0163142	0.00982441	0.0488546	0.361046	0.194433	0.0637327	n	4			9.43409	9.44215	9.47121	9.7507	9.86877	9.71015	9.76193	9.92033	9.85167	9.57904	9.65739	9.76093
ENSMUSG00000028982	0.906791	0.107278	0.784635	0.119805	0.812638	0.39938	n	4			10.2986	10.3309	10.3426	10.3196	10.3141	10.3329	10.2469	10.3112	10.2636	10.2595	10.3002	10.3784
ENSMUSG00000028990	0.00944138	0.0227037	0.0037985	0.608912	0.00341822	0.0602795	n	4			7.18045	7.02132	6.95804	7.48071	7.57721	7.489	7.40552	7.63256	7.34782	7.7483	7.74591	7.82339
ENSMUSG00000028991	0.768542	0.416132	0.271355	0.412806	0.306399	0.412917	n	4			9.51535	9.44852	9.55467	9.50617	9.52351	9.52037	9.49424	9.55467	9.57852	9.49832	9.60444	9.76985
ENSMUSG00000029009	0.117174	0.00905929	0.0430785	0.00999497	0.235014	0.129152	y	4	lower		7.22419	6.88128	7.0335	6.88244	6.71533	6.80952	6.44427	6.50684	6.29175	6.80016	6.65876	6.46894
ENSMUSG00000029022	0.0569915	0.0868951	0.30825	0.371162	0.0845186	0.104299	n	4			8.90947	8.92001	8.90029	8.82933	8.80127	8.72034	8.72704	8.80836	8.5882	8.9251	8.85412	8.85602
ENSMUSG00000029028	0.440686	0.485426	0.515824	0.998563	0.75784	0.827668	n	4			9.06314	8.83819	8.69129	9.08967	8.95157	8.87968	9.0539	9.07887	8.78881	9.01329	8.93486	8.9021
ENSMUSG00000029030	0.0470416	0.0707906	0.0110961	0.17552	0.0179381	0.0114351	n	4			10.9731	10.9748	10.9267	10.8655	10.7145	10.7851	10.8364	10.9267	10.8655	10.4613	10.4096	10.6052
ENSMUSG00000029034	0.2646	0.847862	0.000913511	0.510776	0.00218151	0.086397	n	4			9.01702	8.94311	8.9251	8.96305	8.90427	8.83356	8.90878	9.19139	8.85461	9.31749	9.33403	9.26642
ENSMUSG00000029060	0.162968	0.187335	0.346076	0.647909	0.685565	0.976831	n	4			7.2156	7.05357	7.11679	7.63949	7.32878	7.21237	7.43031	7.39069	7.12144	7.5566	7.32148	7.04788
ENSMUSG00000029066	0.364906	0.0572809	0.490205	0.633572	0.863604	0.519564	n	4			10.2776	10.188	10.2027	10.3057	10.4838	10.1838	10.285	10.4256	10.4187	10.1425	10.4625	10.2986
ENSMUSG00000029068	0.00258507	0.00963868	0.0890751	0.02271	0.0119347	0.273734	y	4	intermediate		8.1295	8.15912	8.05988	7.80011	7.72156	7.65283	7.86817	7.93974	7.96467	7.9047	8.03914	8.03376
ENSMUSG00000029070	0.0301058	0.0372638	0.00405848	0.634902	0.150835	0.429883	n	4			9.41769	9.34532	9.27084	9.67125	9.5483	9.49424	9.68364	9.68513	9.4786	9.74399	9.65379	9.65672
ENSMUSG00000029071	0.00658873	0.547236	0.111667	0.0547409	0.0164521	0.708074	n	4			9.88425	9.86877	9.84595	9.75165	9.72557	9.68364	9.77099	9.88327	9.86768	9.82387	9.85326	9.79667
ENSMUSG00000029076	0.57561	0.092459	0.610923	0.080254	0.394945	0.229721	n	4			9.67949	9.77791	9.70174	9.70719	9.76255	9.56579	9.7598	9.92806	9.89613	9.64892	9.78438	9.83122
ENSMUSG00000032870	0.0501756	0.273386	0.0704603	0.528575	0.311119	0.20576	n	4			7.38916	7.57155	7.51861	7.71254	7.64478	7.718	7.75062	7.46089	7.66632	7.86817	7.63592	8.02004
ENSMUSG00000033423	0.712661	0.992183	0.240616	0.63896	0.224237	0.242369	n	4			8.93557	8.81366	8.76968	8.95904	8.80189	8.8394	8.79241	8.87487	8.84986	8.72639	8.54246	7.70875
ENSMUSG00000034210	0.352459	0.725911	0.791959	0.765945	0.390891	0.622872	n	4			7.54141	7.32878	7.29754	7.61786	7.32833	7.60874	7.70826	7.15904	7.50664	7.64602	7.14821	7.22377
ENSMUSG00000034401	0.168666	0.168309	0.0500452	0.983669	0.198369	0.209703	n	4			11.2393	11.4812	11.5374	11.1211	11.2799	11.2929	11.1351	11.2154	11.3381	10.943	11.138	11.1819
ENSMUSG00000034610	0.05662	0.0837154	0.888478	0.795104	0.16084	0.141887	n	4			8.73776	8.66947	8.75263	8.81466	8.98362	8.86985	8.99165	8.78258	8.96264	8.5981	8.85158	8.7464
ENSMUSG00000035561	0.0404376	0.742236	0.535443	0.113732	0.345528	0.70353	n	4			6.5041	6.59743	6.68829	6.34307	6.38431	6.35062	6.63771	6.4097	6.64272	6.69655	6.28715	6.53064
ENSMUSG00000035572	0.661604	0.941761	0.326153	0.781519	0.554339	0.423077	n	4			7.45485	7.58539	7.58009	7.30765	7.59592	7.56877	7.33342	7.59456	7.66601	7.21185	7.39265	7.59081
ENSMUSG00000035649	0.00647548	0.105652	0.119055	0.652446	0.19129	0.171658	n	4			8.25194	8.18702	8.09462	7.72379	7.59171	7.44647	7.97859	7.355	7.72721	7.61704	5.32916	4.83778
ENSMUSG00000036241	0.119027	0.533085	0.961071	0.471097	0.233695	0.632093	n	4			7.66222	7.38916	7.48071	7.9327	7.57457	8.01069	7.98719	7.343	7.6346	7.84723	7.22941	7.48686
ENSMUSG00000036622	0.149413	0.854646	0.0492612	0.139175	0.915114	0.0692875	n	4			7.11566	7.01859	7.02132	6.98046	6.67166	6.89724	7.15539	7.11913	6.92772	6.95602	6.76688	6.78865
ENSMUSG00000036822	0.926055	0.272173	0.125345	0.48051	0.248048	0.0544423	n	4			8.90346	8.97862	8.94165	8.83686	8.92758	9.08245	8.96264	8.97086	9.12138	8.83615	8.7464	8.90782
ENSMUSG00000036905	0.361623	0.681432	0.631922	0.676332	0.13565	0.39021	n	4			6.52418	6.85754	7.04788	6.56895	6.7939	6.5041	6.37568	6.84791	6.90486	6.7063	6.89724	7.13236
ENSMUSG00000036940	0.492543	0.188185	0.463994	0.0664869	0.733359	0.142943	n	4			10.0954	10.0083	9.94227	10.0401	9.93797	9.94115	10.0968	10.0484	10.1962	9.94952	9.80317	10.071
ENSMUSG00000037348	0.41556	0.646981	0.10828	0.567573	0.254509	0.145286	n	4			8.38542	8.13024	8.02613	8.27815	7.76444	7.99558	8.24349	8.08586	8.02386	7.93777	7.8115	7.30001
ENSMUSG00000038047	0.0757863	0.0176743	0.35403	0.333048	0.1775	0.0364064	n	4			7.17988	7.33342	7.33408	7.38121	7.47771	7.61786	7.55841	7.51073	7.70875	7.30881	7.44254	7.30978
ENSMUSG00000038070	0.494143	0.0461381	0.00563572	0.103268	0.00393373	0.00172106	n	4			7.13293	6.94767	7.1378	6.98577	7.12983	6.89258	6.75206	6.93108	6.67008	7.73372	7.95682	8.11719
ENSMUSG00000038544	0.609925	0.302027	0.164271	0.231282	0.355061	0.164245	n	4			6.39308	6.47798	6.39475	6.40464	6.50228	6.42647	6.18009	6.44427	6.32622	6.4598	6.48702	6.49297
ENSMUSG00000038607	0.00356678	0.00667871	0.000107193	0.475543	0.000611264	0.000486559	n	4			9.32223	9.51535	9.55897	8.75263	8.95904	8.88915	8.79884	9.00451	9.0182	7.84025	7.73552	7.9962
ENSMUSG00000038668	0.332193	0.62639	0.0855401	0.862963	0.450956	0.523696	n	4			7.46089	7.31985	7.29886	7.37797	7.27072	7.16871	7.50899	7.17487	7.20254	7.26019	7.23884	7.13568
ENSMUSG00000039270	0.0100714	0.027066	0.0112811	0.36048	0.36221	0.126962	n	4			6.33052	6.40155	6.46698	5.57135	5.63029	5.88845	5.66363	5.83742	6.04567	5.41932	5.42728	5.77317
ENSMUSG00000039911	0.835197	0.4744	0.774928	0.562774	0.72129	0.48556	n	4			8.1085	8.02772	8.01121	8.15659	7.90899	8.02857	8.15851	7.93564	7.71729	8.36674	8.19718	7.76142
ENSMUSG00000040044	0.00677235	0.0166027	0.00425675	0.628076	0.00583503	0.00628081	n	4			8.25492	8.29161	8.3279	8.61509	8.75638	8.61904	8.58648	8.81182	8.71936	9.10164	9.34304	9.33403
ENSMUSG00000040455	0.0592279	0.382965	0.0708817	0.539766	0.650273	0.383743	n	4			6.68478	6.73274	6.89724	6.41399	6.64872	6.51795	6.38431	6.6792	6.81471	6.28831	6.48773	6.62744
ENSMUSG00000040690	0.353803	0.266233	0.444977	0.118023	0.796554	0.141663	n	4			10.5801	10.4071	10.3727	10.6847	10.5851	10.4129	10.4366	10.3389	10.06	10.6669	10.4694	10.4601
ENSMUSG00000040697	0.499604	0.12559	0.0105231	0.187017	0.00732863	0.00225828	n	4			6.71592	6.72221	6.66116	6.70497	6.62999	6.69606	6.51048	6.6743	6.57174	7.16932	6.99051	7.07213
ENSMUSG00000040720	0.566191	0.853726	0.85725	0.569386	0.899363	0.778766	n	4			7.8446	7.79743	7.71306	7.70275	7.84242	7.69412	7.65412	7.87902	7.87208	7.5589	7.8121	7.91666
ENSMUSG00000040738	0.677611	0.798352	0.298845	0.82285	0.439152	0.29631	n	4			7.07024	7.53986	7.53157	7.22826	7.55068	7.62945	7.31567	7.34828	7.63063	7.39069	7.75478	7.69164
ENSMUSG00000040761	0.429667	0.323948	0.536274	0.907118	0.99277	0.917289	n	4			8.31779	7.40857	7.45556	7.92246	6.47798	7.40601	7.9008	6.69606	7.002	8.36125	7.07024	6.39574
ENSMUSG00000040842	0.855763	0.81381	0.355494	0.853506	0.366442	0.432246	n	4			6.81532	6.75286	6.78036	6.809	6.74048	6.78337	6.93474	6.64581	6.6955	6.88802	6.54829	6.35974
ENSMUSG00000040859	0.193985	0.0627493	0.0824124	0.317919	0.253306	0.497355	n	4			7.44058	7.39996	7.29187	7.52447	7.484	7.39725	7.5213	7.56518	7.47724	7.7064	7.46483	7.56877
ENSMUSG00000041153	0.25253	0.155779	0.211602	0.528457	0.291049	0.37012	n	4			6.94824	7.02463	6.94824	6.87227	6.89092	6.98371	6.84791	6.81364	6.96559	6.55026	6.54888	7.00447
ENSMUSG00000041272	0.130435	0.0148197	0.00940355	0.0281874	0.0334776	0.0506099	y	4	lower		6.84895	6.95309	6.97164	6.87591	6.81286	6.81806	6.47798	6.24864	6.13548	6.71085	6.5762	6.68829
ENSMUSG00000042198	0.12551	0.0675938	0.0976162	0.362586	0.797796	0.555041	n	4			9.67781	9.3843	9.39743	9.74586	9.71353	9.72763	9.79575	9.87221	9.697	9.80592	9.64824	9.77559
ENSMUSG00000042202	0.796176	0.039545	0.641649	0.00516491	0.370338	0.0305554	y	4	higher		6.54742	6.7334	6.63519	6.59672	6.67779	6.59019	6.80016	6.84323	6.90213	6.60479	6.66621	6.74781
ENSMUSG00000042380	0.00264565	0.113377	0.0451987	0.368808	0.687361	0.310287	n	4			7.76398	7.676	7.77061	8.20597	8.05604	8.15585	8.16389	8.07243	7.80631	8.25061	8.34752	7.97971
ENSMUSG00000042408	0.0296563	0.229684	0.204772	0.213367	0.748196	0.545908	n	4			8.00805	8.0868	8.04321	7.79581	7.93035	7.78439	7.83956	7.96657	8.03879	7.68636	7.95158	7.98398
ENSMUSG00000043257	0.904046	0.27982	0.684424	0.220332	0.638381	0.77219	n	4			5.70475	5.56034	5.49418	5.57907	5.67155	5.53736	5.35724	5.6127	5.41483	5.49124	5.27191	5.77926
ENSMUSG00000043753	0.177883	0.0106217	0.3633	0.0335422	0.532111	0.0198193	y	4	higher		6.41058	6.5762	6.73027	6.7593	6.83211	6.67166	7.25912	7.12331	7.54214	6.58271	6.66672	6.83266
ENSMUSG00000044018	0.22739	0.303916	0.729599	0.533307	0.570649	0.85007	n	4			6.58932	6.50616	6.64581	6.65876	6.82296	6.60306	6.58744	6.70372	6.63743	6.49297	6.55683	6.81364
ENSMUSG00000044496	0.64687	0.110037	0.142804	0.182371	0.0969166	0.0267448	n	4			8.01465	8.08913	8.13563	8.1785	8.10045	8.03979	8.25431	8.11024	8.27685	7.98719	7.86058	8.0358
ENSMUSG00000044700	0.436116	0.539082	0.0609463	0.92604	0.102275	0.209785	n	4			6.19904	6.19407	6.16985	6.26368	6.12744	6.39961	6.52037	6.19575	6.11839	6.46134	6.38903	6.66809
ENSMUSG00000044813	0.00190926	0.000479926	0.00524547	0.933532	0.0893461	0.088251	n	4			6.81572	6.6743	6.6165	7.69753	7.4035	7.57675	7.66017	7.50128	7.489	8.2087	7.86895	7.75062
ENSMUSG00000045071	0.625947	0.702547	0.0621831	0.904318	0.123554	0.0971494	n	4			5.68737	5.64034	5.8534	5.66165	5.57135	5.80109	5.6167	5.63634	5.81647	5.51094	5.42231	5.6003
ENSMUSG00000045751	0.855068	0.894744	0.248404	0.976834	0.286146	0.289204	n	4			6.66956	6.62876	6.51438	6.70558	6.52111	6.62744	6.64201	6.71085	6.49352	6.79505	6.57776	6.92354
ENSMUSG00000046447	0.0245509	0.0324803	0.00687332	0.133163	0.0196852	0.17979	n	4			9.489	9.31919	9.28644	9.17493	8.96562	9.01428	8.93964	8.43363	8.75572	8.63668	8.21102	8.32731
ENSMUSG00000046667	0.608566	0.11247	0.0244441	0.484601	0.160887	0.195701	n	4			6.69315	6.9222	6.89577	6.65978	7.0843	7.02463	6.92073	7.16555	7.04028	7.08049	7.18689	7.33471
ENSMUSG00000046671	0.421125	0.205983	0.0498121	0.120748	0.0266912	0.125448	n	4			9.99056	10.0854	10.0848	10.0149	10.2144	10.1137	9.89395	10.0513	9.95835	9.74122	9.93913	9.72364
ENSMUSG00000046862	0.236998	0.0981597	0.134965	0.425896	0.521458	0.898234	n	4			7.51147	7.67155	7.66836	7.305	7.55478	7.56203	7.18045	7.50899	7.39176	7.20366	7.3725	7.56284
ENSMUSG00000047719	0.052775	0.0180309	0.0025416	0.0365338	0.0115792	0.0562166	y	4	intermediate		7.39665	7.23884	7.25161	7.12924	7.06125	7.1706	7.02132	6.9929	6.96118	6.87889	6.69179	6.80722
ENSMUSG00000047945	0.00658031	0.0156571	0.0594435	0.0635774	0.216109	0.0296139	n	4			10.2509	10.3895	10.3141	10.6914	10.5453	10.6252	11.0531	10.7655	11.1078	10.4771	10.4338	10.6271
ENSMUSG00000049119	0.920452	0.639335	0.292613	0.511577	0.218043	0.459912	n	4			5.84706	5.40945	5.33849	5.67489	5.28773	5.56932	5.7745	5.37619	5.75716	6.08777	5.80109	5.529
ENSMUSG00000049969	0.134939	0.0794493	0.0348695	0.859572	0.426147	0.4896	n	4			7.08826	7.09851	7.19852	6.70048	7.0078	6.98741	6.71461	7.00447	6.90261	6.62606	6.88488	6.84416
ENSMUSG00000050188	0.00070489	2.53286e-05	0.000277397	0.640601	1.93182e-05	0.00638469	n	4			8.65099	8.42209	8.45395	10.7522	10.7857	10.7404	10.6573	10.8617	10.6431	11.4791	11.4306	11.4166
ENSMUSG00000050213	0.0260242	0.00983853	0.000835164	0.839048	0.0710548	0.0306202	n	4			8.80127	8.83686	8.80979	8.31779	8.50879	8.2474	8.24587	8.43002	8.33616	8.05563	8.11079	8.16714
ENSMUSG00000050608	0.0594318	0.302937	0.430334	0.526591	0.41382	0.836882	n	4			10.7673	10.7107	10.674	10.8114	10.9174	10.7992	10.7737	10.9015	10.7107	10.6873	10.7551	10.8895
ENSMUSG00000050890	0.562054	0.124318	0.83331	0.0793397	0.682962	0.106414	n	4			5.84027	5.74727	5.71298	5.81423	5.65721	5.71597	5.9692	5.79457	6.00824	5.70475	5.73412	5.8261
ENSMUSG00000053841	0.395901	0.417756	0.760044	0.994951	0.517238	0.520685	n	4			6.97695	6.88244	6.8979	7.10111	6.88802	6.97295	7.10619	6.88244	6.97164	7.11333	6.89258	6.59122
ENSMUSG00000054000	0.0103149	0.00808693	0.00619601	0.0864956	0.237424	0.913105	n	4			8.61363	8.451	8.38852	8.98242	8.85931	8.82487	9.07569	8.99597	9.00077	9.15802	8.97447	8.91162
ENSMUSG00000054405	0.43254	0.0673476	0.128609	0.456393	0.92142	0.216619	n	4			9.81077	9.72705	9.66525	10.0033	9.90708	9.62765	10.0263	10.0316	9.81572	9.84077	9.86352	9.79575
ENSMUSG00000055401	0.275073	0.469871	0.156487	0.0761938	0.0267647	0.285916	n	4			8.73607	8.51519	8.51297	8.8255	8.62755	8.67416	8.59999	8.53281	8.40707	8.46608	8.37385	8.45291
ENSMUSG00000055963	0.919182	0.0305127	0.452081	0.0441965	0.64463	0.0510909	y	4	lower		7.0992	7.12461	6.97639	6.9413	7.23266	6.9929	6.56845	6.85856	6.66037	6.87289	7.08253	7.04497
ENSMUSG00000057236	0.226292	0.930744	0.0384983	0.452998	0.0395366	0.0220595	n	4			10.5393	10.6987	10.6388	10.324	10.1384	10.6511	10.6813	10.1716	10.9555	9.38503	8.38598	9.3634
ENSMUSG00000057375	0.0566142	0.0255881	0.00443125	0.404981	0.639853	0.185723	n	4			9.37404	9.23531	9.21868	9.01428	8.82742	8.55295	8.75831	8.75042	8.36599	8.81324	8.97086	8.83686
ENSMUSG00000060862	0.0687438	0.0186922	0.0366912	0.0267988	0.256822	0.125074	y	4	lower		7.12548	6.67364	6.7394	6.44377	6.29865	6.38364	6.19904	6.08274	5.97223	6.17923	6.22141	6.39961
ENSMUSG00000062627	0.0354451	0.168913	0.0139197	0.532125	0.0305824	0.601532	n	4			5.70745	5.45737	5.50142	5.36086	5.19397	5.17204	5.3411	4.57551	5.2598	4.90657	4.91117	4.91117
ENSMUSG00000062937	0.0547982	0.228214	0.0500283	0.885803	0.305999	0.579084	n	4			6.17673	6.2494	6.22035	6.30786	6.49297	6.43379	6.22035	6.41751	6.66249	6.36895	6.59743	6.60999
ENSMUSG00000063172	0.755618	0.0233839	0.0542062	0.0774657	0.0508496	0.156251	n	4			8.88819	8.79884	8.87853	8.81038	8.8433	8.96872	9.08159	9.01595	8.96069	9.15999	9.10743	9.42961
ENSMUSG00000063800	0.0291361	0.029942	0.0160856	0.135611	0.0453999	0.169821	n	4			8.70258	8.77541	8.63737	8.92758	8.85461	8.84919	8.97151	9.2288	8.99986	9.11634	9.27084	9.45046
ENSMUSG00000063882	0.0762279	0.0742303	0.12101	0.221302	0.357369	0.835585	n	4			10.9555	10.9768	10.9113	11.093	11.1078	10.9866	11.1474	11.3381	11.0907	11.0192	11.1621	11.3188
ENSMUSG00000064141	0.028636	0.0584224	0.000192483	0.186132	0.000439557	0.00321663	n	4			6.40262	6.35769	6.22856	6.10758	6.14063	6.04567	5.5897	6.08883	5.75397	7.39517	7.35389	7.5554
ENSMUSG00000065990	0.123234	0.237818	0.0139274	0.796586	0.0531214	0.0767122	n	4			9.4989	9.63932	9.5713	9.66285	9.69356	9.65198	9.57992	9.82776	9.66525	9.85768	9.85768	10.0476
ENSMUSG00000066036	0.930567	0.500542	0.379202	0.520398	0.282356	0.122216	n	4			10.2233	9.82574	9.74224	10.1664	9.80592	9.76445	9.99648	9.79991	9.5625	10.1676	10.0436	10.0794
ENSMUSG00000066148	0.543021	0.382392	0.404657	0.600195	0.616249	0.985981	n	4			6.42055	6.06745	5.93564	6.20787	5.90873	5.95948	6.29688	5.66603	5.72147	6.29972	5.83382	5.53399
ENSMUSG00000066152	0.0338021	0.0286305	0.0908124	0.314968	0.710145	0.240707	n	4			6.798	6.84895	6.84546	6.63519	6.664	6.50144	6.59979	6.53471	6.38903	6.55303	6.76643	6.58177
ENSMUSG00000070737	0.625956	0.916435	0.00734972	0.8151	0.003162	0.00463778	n	4			7.10111	7.03871	7.16064	7.11566	7.1317	6.93775	7.01207	7.26708	6.98809	7.63426	7.83409	7.92489
ENSMUSG00000070934	0.188756	0.165828	0.049878	0.720655	0.117321	0.198525	n	4			8.10187	8.21632	8.10345	8.04795	7.69923	8.02772	8.07025	7.60274	7.89738	7.84301	7.40857	7.3838
ENSMUSG00000071014	0.101973	0.0122212	0.646791	0.127588	0.213561	0.025899	n	4			9.75871	9.92401	9.91233	9.92213	10.1664	10.0894	10.1196	10.2806	10.3439	9.79575	9.89121	10.0411
ENSMUSG00000073700	0.572841	0.113347	0.125258	0.1879	0.0843385	0.0261541	n	4			7.34499	7.22222	7.26473	7.28304	7.11566	7.30307	7.07846	7.20699	6.91923	7.60014	7.31448	7.58159
ENSMUSG00000073705	0.125626	0.41653	0.150616	0.406916	0.661268	0.298767	n	4			6.65014	6.77457	6.72547	6.9015	7.11679	6.80116	6.79678	6.99113	6.65978	6.88688	6.87713	7.29237
ENSMUSG00000073775	0.00707914	0.00203882	0.00111752	0.410148	0.0132647	0.00953806	n	4			7.56454	7.72585	7.67227	7.08912	6.99828	7.2612	7.12983	7.25777	7.20773	6.53064	6.61095	6.79859
ENSMUSG00000073987	0.954493	0.0393842	0.814079	0.0437009	0.836077	0.264217	y	4	higher		6.55953	6.68883	6.71139	6.53305	6.70372	6.73744	6.81471	6.96723	7.08377	6.50616	6.5586	7.0322
ENSMUSG00000074088	0.503424	0.111132	0.277276	0.382382	0.435009	0.762076	n	4			7.1672	7.30172	7.24605	7.29307	7.18836	7.39027	7.34375	7.29504	7.45485	7.23884	7.35463	7.62453
ENSMUSG00000078484	0.216887	0.0410168	0.844109	0.103324	0.479072	0.0633683	n	4			6.89848	6.80722	6.70558	6.74419	6.71892	6.65615	6.49443	6.60402	6.30146	6.67996	6.71203	6.95386
ENSMUSG00000078570	0.111161	0.0728009	0.00687846	0.692449	0.0231826	0.0321698	n	4			10.5738	10.3874	10.4009	10.3697	10.2094	10.31	10.3389	10.2553	10.2198	10.0992	9.88974	9.86877
ENSMUSG00000078584	0.0121119	0.010689	0.00123906	0.149534	0.0032768	0.00477589	n	4			7.53665	7.14963	7.25229	8.311	8.26275	8.23778	8.01763	8.22116	7.84888	9.04205	8.84615	8.92063
ENSMUSG00000078588	0.316334	0.0754755	0.758629	0.401133	0.214524	0.0439449	n	4			9.22428	8.90489	8.79307	9.03336	8.48864	8.69322	8.78364	8.49197	8.37041	9.2465	8.88314	8.96069
ENSMUSG00000078716	0.0461022	0.413092	0.465512	0.067931	0.202959	0.90857	n	4			7.15592	7.27413	6.99167	6.85317	6.76296	6.8214	6.90773	7.14511	7.07272	6.83883	6.99948	7.23696
ENSMUSG00000078773	0.098097	0.0528324	0.418625	0.965196	0.110604	0.109362	n	4			6.50616	6.4912	6.5959	6.10405	6.43967	6.24476	6.10473	6.32688	6.33959	6.36289	6.82431	6.94417
ENSMUSG00000079971	0.680476	0.683953	0.89918	0.402181	0.527832	0.732806	n	4			9.08317	8.64438	8.54551	9.10352	8.67362	8.77636	8.93689	8.65391	8.37902	8.96443	8.59191	8.63404
ENSMUSG00000001467	0.33342	0.0875119	0.977344	0.254568	0.546851	0.199736	n	5		SO	8.41005	8.53444	8.54972	8.33834	8.46911	8.47825	8.39017	8.21277	8.38542	8.33616	8.51232	8.63668
ENSMUSG00000005103	0.0136288	0.0571469	0.0102891	0.558754	0.402344	0.974561	n	5		SO	8.86512	8.83356	8.9184	8.76356	8.67416	8.72639	8.79138	8.61675	8.6347	8.7452	8.65984	8.64438
ENSMUSG00000015653	0.101102	0.0561406	0.0958266	0.14714	0.464447	0.342554	n	5		SO	6.29793	6.45643	6.39961	6.12425	6.33797	6.12425	5.69446	6.15127	5.86466	5.88123	6.14152	6.24476
ENSMUSG00000025340	0.414019	0.173074	0.114173	0.918791	0.512469	0.461379	n	5		SO	6.20229	6.11839	6.24791	6.09237	6.64438	6.32447	6.26603	6.55763	6.29865	6.2603	6.6524	6.58352
ENSMUSG00000025534	0.000163062	2.14792e-05	0.0311231	0.00913599	0.453869	0.0945713	y	5	lower	SO	6.8366	6.92073	6.87384	6.31967	6.23138	6.32688	6.09615	6.14364	6.06304	6.42322	6.53064	6.19817
ENSMUSG00000025856	0.285253	0.0940559	0.57419	0.0472992	0.230736	0.409335	n	5		SO	6.95465	6.97517	6.97295	7.54371	6.85317	7.43547	6.79599	6.27198	6.42422	7.26473	6.76391	6.34107
ENSMUSG00000028962	0.465492	0.576972	0.468662	0.847771	0.975862	0.835203	n	5		SO	7.96936	7.38961	7.18564	8.0317	7.489	7.71729	8.05668	7.57675	7.45588	8.11285	7.6209	7.52747
ENSMUSG00000029233	0.0274367	0.0424832	0.54329	0.252349	0.280486	0.107285	n	5		SO	5.68538	5.65401	5.63814	5.28773	5.25531	5.45101	5.24131	5.28773	4.93747	5.55197	5.28947	5.80902
ENSMUSG00000029234	0.134564	0.405782	0.511237	0.0773027	0.383978	0.198099	n	5		SO	8.51361	8.76488	8.77828	8.41935	8.56992	8.47554	8.60323	8.88539	8.9528	8.40815	8.67362	8.70055
ENSMUSG00000029322	0.000497521	0.000919149	0.474322	0.751399	0.0251163	0.0199935	n	5		SO	8.54035	8.58119	8.68444	7.91162	7.98463	7.81259	7.91965	7.95084	7.75929	8.25663	8.62897	8.60071
ENSMUSG00000029385	0.0831779	0.130858	0.126712	0.449091	0.621183	0.738628	n	5		SO	6.37862	6.32688	6.31967	6.44143	6.63166	6.47855	6.39759	6.71989	6.78036	6.58744	6.73813	6.40827
ENSMUSG00000029470	0.861663	0.198861	0.816102	0.247166	0.759682	0.529987	n	5		SO	6.18995	6.21577	6.23466	6.41879	6.27889	6.01336	6.20229	6.01806	5.85716	6.5007	6.09	5.9109
ENSMUSG00000029718	0.195094	0.0410864	0.137381	0.0034405	0.400838	0.537946	y	5	higher	SO	7.89291	8.41417	8.21879	8.42445	8.55102	8.40486	8.83251	8.85372	8.92223	8.45919	8.48864	9.15641
ENSMUSG00000034462	0.233375	0.0623415	0.645465	0.156506	0.503907	0.137928	n	5		SO	7.57675	7.78843	7.80306	7.81519	7.90542	7.8121	7.92246	7.89586	8.08008	7.6163	7.83782	7.87706
ENSMUSG00000037685	0.0237264	0.0038158	0.0320418	0.261453	0.233703	0.033126	n	5		SO	4.59205	4.48045	4.48045	4.20037	3.99561	3.87157	3.93559	3.93559	3.72194	4.09413	4.14899	4.3412
ENSMUSG00000037720	0.861358	0.48772	0.378774	0.687361	0.583173	0.872454	n	5		SO	7.1018	7.27609	7.26242	7.06125	7.41883	7.2271	7.11816	7.38508	7.38075	7.14691	7.41067	7.38916
ENSMUSG00000037999	0.988802	0.134805	0.232914	0.128914	0.234756	0.0703929	n	5		SO	5.7631	5.59374	5.34883	5.64966	5.71597	5.33247	5.87124	5.79147	5.89396	4.9643	5.31079	5.54327
ENSMUSG00000038181	0.390374	0.0213256	0.380409	0.206858	0.737024	0.558627	n	5		SO	6.28434	6.29865	6.21414	6.11519	6.32954	6.11839	6.11339	6.08658	5.97307	6.19174	6.30359	5.92133
ENSMUSG00000044674	0.847218	0.641788	0.394179	0.6913	0.0332092	0.279152	n	5		SO	6.064	6.2247	6.45751	6.29063	6.18161	6.19719	6.44699	5.95699	6.05718	6.43379	6.35613	6.32688
ENSMUSG00000046079	0.158392	0.0753552	0.0187825	0.462104	0.053808	0.026337	n	5		SO	6.2526	6.17566	6.19301	6.00222	5.91229	6.18764	6.11242	6.16295	6.05141	5.68538	5.62214	5.88123
ENSMUSG00000061288	0.17299	0.815867	0.00050877	0.224779	0.0142362	0.013398	n	5		SO	6.74048	6.664	6.71651	6.69752	6.59743	6.52349	6.85031	6.63771	6.68589	6.34758	6.3463	6.26368
ENSMUSG00000063406	0.124248	0.644014	0.126928	0.430184	0.395297	0.214136	n	5		SO	6.52813	6.71332	6.7334	6.38707	6.54142	6.55086	6.41058	6.62125	6.75988	6.0933	6.44876	6.51105
ENSMUSG00000002240	0.00209035	0.0439088	0.00762088	0.206491	0.696849	0.242019	n	5		PM	9.59448	9.45158	9.54099	9.17889	9.12967	9.04021	9.10093	8.81324	8.51742	9.15001	8.95157	9.14851
ENSMUSG00000006143	0.00414413	0.00465228	0.0258821	0.956449	0.52498	0.504187	n	5		PM	8.14693	7.80675	8.08913	7.24051	7.0071	6.80283	7.04317	7.21477	6.76057	7.2055	7.47657	6.84039
ENSMUSG00000007907	0.805912	0.231793	0.470867	0.291331	0.60045	0.636334	n	5		PM	11.7417	11.9919	12.007	11.8013	12.0705	11.9604	11.9571	12.0978	12.128	11.8408	12.0978	12.0896
ENSMUSG00000008307	0.0140456	0.000254448	0.0279808	0.034954	0.793805	0.0827721	y	5	lower	PM	10.0156	10.1384	10.1196	9.54265	9.76093	9.74861	9.40323	9.37505	9.32015	9.47271	9.69799	9.78332
ENSMUSG00000025535	0.566812	0.00201371	0.154532	0.0591279	0.162797	0.00391893	n	5		PM	11.6336	11.5672	11.6336	11.488	11.6899	11.5272	11.3177	11.3461	11.4072	11.6491	11.6682	11.7812
ENSMUSG00000028926	0.0241187	0.00447356	0.0866699	0.00934195	0.00930596	0.00159704	y	5	lower	PM	6.76643	6.76862	6.73813	6.52612	6.52179	6.63071	6.27342	6.39191	6.2934	6.78036	6.79971	6.83883
ENSMUSG00000028938	0.34612	0.0227609	0.0530161	0.181333	0.348834	0.471688	n	5		PM	11.3511	11.5447	11.5789	11.1754	11.5272	11.369	11.1097	11.1147	11.253	11.0907	11.3011	11.2837
ENSMUSG00000029134	0.168764	0.00453888	0.715376	0.000685111	0.359538	0.00848301	y	5	lower	PM	7.81519	7.89238	7.98463	7.96657	7.96281	8.08008	7.52613	7.48313	7.43442	7.80785	7.98961	7.98597
ENSMUSG00000029138	0.00169438	0.00305914	0.0242782	0.0978172	0.02022	0.00803292	n	5		PM	6.94883	6.81532	6.90093	6.26118	6.43545	6.38593	6.30636	6.06917	6.10317	6.5382	6.66249	6.72152
ENSMUSG00000029155	0.212372	0.573691	0.12952	0.142687	0.865954	0.0995689	n	5		PM	12.0896	12.014	11.9737	12.2218	12.0623	12.0745	12.0896	11.9444	11.9293	12.2147	12.1096	12.0705
ENSMUSG00000029168	0.129974	0.034174	0.373605	0.0724866	0.510512	0.991368	n	5		PM	8.05988	7.91338	7.85471	7.8585	7.58245	7.78739	7.5762	7.1952	7.07713	8.00234	7.7109	6.11339
ENSMUSG00000029182	0.961946	0.244465	0.00846977	0.239803	0.0130331	0.0146715	n	5		PM	10.5527	10.4087	10.4351	10.5044	10.4862	10.4139	10.3309	10.4565	10.0906	10.8327	10.8059	11.0127
ENSMUSG00000029186	0.0680018	0.0401895	0.636926	0.426497	0.132601	0.0781363	n	5		PM	9.06213	9.21868	9.23158	8.94661	9.02449	9.02217	8.93059	8.92661	9.02584	9.0182	9.20692	9.16626
ENSMUSG00000029192	0.848638	0.0136696	0.425466	0.0108005	0.390873	0.041409	y	5	lower	PM	8.71209	8.77828	8.77541	8.8007	8.71209	8.77379	8.50809	8.32253	8.40214	8.81275	8.67227	8.56691
ENSMUSG00000029248	0.0197483	0.518821	0.00241019	0.0502722	0.162683	0.179882	n	5		PM	11.0813	11.03	11.0429	11.3595	11.2727	11.218	11.1938	11.0708	11.0146	11.1754	11.1919	11.2258
ENSMUSG00000029291	0.809903	0.181381	0.0306047	0.438364	0.0813435	0.11292	n	5		PM	6.48601	6.56072	6.60251	6.42489	6.61933	6.55303	6.50616	6.41151	6.50616	6.38364	6.42489	6.27727
ENSMUSG00000029320	0.0657486	0.808434	0.0301878	0.0917749	0.183526	0.0349807	n	5		PM	11.2892	11.3848	11.4339	11.4398	11.5949	11.5447	11.3214	11.4714	11.3629	11.5672	11.797	11.6263
ENSMUSG00000029386	0.115303	0.0389044	0.384565	0.492497	0.273715	0.0857892	n	5		PM	9.66624	9.46055	9.45412	9.47378	9.20084	9.22767	9.35445	9.19292	9.09297	9.52351	9.4657	9.32223
ENSMUSG00000029477	0.664666	0.138372	0.31818	0.113519	0.292927	0.664116	n	5		PM	10.3064	10.3901	10.3816	10.3854	10.3329	10.4087	10.3371	10.2	10.1327	10.3278	10.2821	9.79371
ENSMUSG00000029564	0.00283422	0.0132573	0.0982556	0.468973	0.000419965	0.0124253	n	5		PM	8.66249	8.50935	8.57656	8.20487	8.13024	8.24423	8.23154	8.16389	7.96657	8.65514	8.73776	8.71044
ENSMUSG00000029607	0.0214854	0.0685374	0.209883	0.10944	0.0995838	0.0196381	n	5		PM	10.6359	10.6033	10.6052	10.5639	10.5379	10.5749	10.3932	10.4788	10.2431	10.6175	10.7145	10.8046
ENSMUSG00000029640	0.00687356	0.0079414	0.000280038	0.106081	0.0187958	0.463664	n	5		PM	9.62225	9.48173	9.44745	8.94603	8.69743	8.98468	8.73066	8.30671	8.59999	8.33308	8.39303	8.55539
ENSMUSG00000029723	0.837018	0.256883	0.0919016	0.30464	0.195544	0.114349	n	5		PM	9.67843	9.57992	9.63059	9.697	9.45752	9.67843	9.68275	9.34051	9.25871	9.82776	9.67056	9.77099
ENSMUSG00000033794	0.980464	0.102221	0.71789	0.0229577	0.648294	0.0287487	y	5	lower	PM	10.7415	10.9731	11.0085	10.8276	10.9898	10.9133	10.6451	10.6511	10.7655	10.8313	11.0324	10.9802
ENSMUSG00000036087	0.534914	0.975199	0.960037	0.530067	0.342321	0.925191	n	5		PM	9.85326	10.109	10.1137	9.84595	10.0243	9.99454	9.93157	9.95502	10.1779	9.96759	10.0124	10.1117
ENSMUSG00000037736	0.01746	0.00280797	0.0554828	0.0696219	0.0103434	0.00493827	n	5		PM	5.72625	5.74971	5.64966	5.45492	5.56034	5.56034	5.47288	5.37261	5.36727	6.04273	5.92019	5.82322
ENSMUSG00000037905	0.886075	0.341935	0.482311	0.308176	0.433452	0.822468	n	5		PM	8.81408	8.55706	8.63058	8.82399	8.52785	8.70258	8.74082	8.40895	8.41122	8.71362	8.33308	8.62897
ENSMUSG00000038044	0.122528	0.0288538	0.0652651	0.0360596	0.648294	0.0419958	y	5	lower	PM	9.59166	9.49832	9.57852	9.50677	9.45412	9.33046	9.1255	8.89243	8.69743	9.41362	9.47121	9.49424
ENSMUSG00000038165	0.400448	0.22246	0.0944833	0.118819	0.202296	0.0319877	n	5		PM	10.3739	10.2821	10.2918	10.4459	10.5032	10.2479	10.2569	10.2595	10.0156	10.6147	10.7404	10.4106
ENSMUSG00000040514	0.224666	0.956296	0.521618	0.398216	0.710553	0.607866	n	5		PM	9.98091	10.0124	10.0745	10.0411	10.2013	10.0772	9.92907	10.1734	9.95031	9.94541	10.1488	10.1282
ENSMUSG00000040576	0.802111	0.13634	0.64485	0.149383	0.72293	0.459098	n	5		PM	9.23238	9.11341	9.13678	9.24731	9.22587	8.91434	9.00313	8.81408	8.40002	9.33119	9.24206	8.46365
ENSMUSG00000043036	0.00461554	0.000576011	0.00272523	0.0249522	0.0106013	0.053207	y	5	intermediate	PM	10.7573	10.61	10.7205	10.2509	10.2431	10.402	10.1374	10.0476	9.97563	9.78738	9.86683	9.56686
ENSMUSG00000049550	0.489194	0.121974	0.655498	0.194819	0.737019	0.159409	n	5		PM	8.32626	8.05202	8.06293	8.22903	7.95421	7.96936	8.07405	7.53455	7.54263	8.23238	8.01069	8.03278
ENSMUSG00000054909	0.346442	0.0438965	0.151271	0.136282	0.429302	0.470241	n	5		PM	9.74014	9.25622	9.31071	9.3993	8.51933	9.32298	8.86309	7.84789	8.25317	9.34476	8.16389	8.54838
ENSMUSG00000062077	0.00283981	0.0119361	0.00105452	0.29616	0.0319591	0.015851	n	5		PM	7.83693	7.68636	7.61748	8.39098	8.2706	8.19555	8.13932	8.31544	8.04906	8.61267	8.47766	8.74913
ENSMUSG00000062604	0.135446	0.880071	0.945371	0.599887	0.795446	0.873748	n	5		PM	10.4139	10.4265	10.4613	10.5061	10.4431	10.4852	10.5749	10.2364	10.4397	10.6271	10.4788	10.2233
ENSMUSG00000072647	0.627669	0.188036	0.0470715	0.136638	0.277353	0.0765962	n	5		PM	10.8578	10.7522	10.7245	10.9031	10.8914	10.6758	10.7688	10.5494	10.3932	10.8995	10.9584	10.9379
ENSMUSG00000079659	0.807572	0.265555	0.0233005	0.252438	0.0146238	0.00761086	n	5		PM	8.09161	8.07526	8.08485	7.93907	8.09462	8.30671	7.861	7.69805	8.12364	8.56167	8.67943	8.89681
ENSMUSG00000079666	0.0178282	0.00740237	0.0150002	0.0468376	0.0500238	0.186574	y	5	intermediate	PM	10.6431	10.6799	10.7887	10.3796	10.5076	10.51	10.2667	10.3018	10.3044	9.9093	10.1038	10.2605
ENSMUSG00000003623	0.614445	0.110338	0.318382	0.155381	0.464435	0.504459	n	5		MI	5.69312	5.97651	6.01748	5.92608	6.09615	5.86815	5.99548	6.26118	6.4097	5.90873	6.00824	6.3517
ENSMUSG00000004530	0.815889	0.613941	0.105371	0.582598	0.306149	0.0634142	n	5		MI	6.2934	6.18764	6.01195	6.24082	5.80598	6.31061	6.39672	6.11684	6.17358	6.07039	5.88384	5.73049
ENSMUSG00000005672	0.0383557	0.0236588	0.0099194	0.555954	0.146316	0.543436	n	5		MI	6.22093	6.34965	6.41629	6.56274	6.6165	6.57492	6.60479	6.5357	6.74419	6.59463	6.70787	6.73214
ENSMUSG00000006262	0.126614	0.011661	0.672479	0.445855	0.356683	0.158291	n	5		MI	6.48887	6.51717	6.41811	6.67166	6.66116	6.49564	6.62876	6.64056	6.72947	6.42055	6.45876	6.65698
ENSMUSG00000007812	0.408364	0.115253	0.338325	0.169563	0.686298	0.25769	n	5		MI	6.63771	6.73813	6.71085	6.71863	6.83532	6.68589	6.77774	6.93775	7.11432	6.65615	6.895	6.798
ENSMUSG00000011831	0.0118177	0.023923	0.00828756	0.177248	0.343826	0.406563	n	5		MI	7.61404	7.52495	7.51249	7.72098	7.86272	7.78055	7.89506	7.83629	8.09161	7.76142	7.897	7.90714
ENSMUSG00000013622	0.285603	0.311275	0.0147514	0.0313977	0.0125712	0.00108205	y	5	higher	MI	8.08167	8.39789	8.3733	8.11837	8.25562	8.01465	8.32626	8.49063	8.45056	7.60923	7.75129	7.81609
ENSMUSG00000013629	0.290503	0.0694229	0.625063	0.547721	0.819865	0.551952	n	5		MI	6.01952	5.78852	5.60369	6.33211	5.76462	6.06745	6.32688	6.13043	6.07598	6.49564	5.90873	5.51639
ENSMUSG00000014956	0.467838	0.134348	0.493684	0.224277	0.0719516	0.0490973	n	5		MI	9.21332	9.73178	9.78332	9.55576	9.85984	9.82387	9.83372	9.91927	10.402	9.22497	9.49603	9.52815
ENSMUSG00000015806	0.0805223	0.00220582	0.607875	0.014742	0.296656	0.0219811	y	5	higher	MI	8.27348	8.48112	8.41246	8.57831	8.73968	8.50191	8.92801	9.02321	9.05465	8.28086	8.45497	8.63225
ENSMUSG00000018001	0.0138972	0.000540763	0.0305398	0.0152992	0.940053	0.0261825	y	5	higher	MI	7.95008	8.01121	7.98129	8.19017	8.11666	8.09947	8.32986	8.30466	8.32986	8.06553	8.14819	8.1819
ENSMUSG00000019179	0.0439805	0.00358647	0.121471	0.0263581	0.919025	0.0562025	y	5	higher	MI	8.3832	8.58174	8.54479	8.63906	8.85223	8.77942	8.94933	9.10743	9.1872	8.59249	8.70913	8.93059
ENSMUSG00000028771	0.257956	0.0528425	0.0518624	0.141559	0.152035	0.653346	n	5		MI	6.7614	7.08049	7.18176	7.0322	7.28761	7.33679	7.31782	7.42858	7.59307	7.27012	7.55775	7.74973
ENSMUSG00000028780	0.506212	0.261702	0.180554	0.178608	0.247829	0.0686561	n	5		MI	6.81751	6.90486	6.93003	6.7453	6.91125	6.86315	6.91252	6.96661	7.24205	6.41629	6.75286	6.78567
ENSMUSG00000028945	0.309272	0.0597192	0.856455	0.136291	0.316342	0.0637837	n	5		MI	8.78364	9.13744	9.13744	9.07637	9.24511	9.2179	9.25016	9.52037	9.73416	8.85764	9.12464	9.16457
ENSMUSG00000028969	0.368094	0.0415748	0.43281	0.148046	0.345909	0.225849	n	5		MI	7.16179	7.1056	7.02894	7.24728	7.18689	7.06523	7.3229	7.38121	7.20057	7.16483	7.04184	6.28624
ENSMUSG00000029090	0.574868	0.206478	0.819075	0.32704	0.525215	0.212807	n	5		MI	7.28688	7.46746	7.5658	7.38557	7.59955	7.52447	7.50479	7.57849	7.86421	7.19065	7.39941	7.62018
ENSMUSG00000029096	0.00452745	0.00146951	0.0047247	0.0277726	0.0194461	0.0595557	y	5	intermediate	MI	6.31891	6.14592	6.11684	6.77706	6.70882	6.58044	6.99385	6.87121	6.95999	7.47245	7.18836	7.66017
ENSMUSG00000029106	0.402305	0.26036	0.743176	0.681134	0.453889	0.336966	n	5		MI	8.03302	7.82196	7.83693	8.18282	7.8324	8.02506	8.29776	7.89506	8.05328	8.12892	7.88828	7.44058
ENSMUSG00000029110	0.03093	0.153985	0.0257	0.521574	0.922841	0.558301	n	5		MI	9.97073	10.0115	10.06	10.2109	10.4034	10.2393	10.3211	10.2714	10.0316	10.1664	10.324	10.3381
ENSMUSG00000029176	0.00634146	0.00146774	0.0151618	0.0860167	0.166885	0.718609	n	5		MI	8.12657	8.28864	8.32311	8.65139	8.8394	8.64141	8.81275	8.89941	9.02011	8.79013	8.90029	9.20692
ENSMUSG00000029213	0.0296422	0.0396704	0.0147731	0.879372	0.381571	0.354238	n	5		MI	5.73623	6.20787	6.25427	6.55397	6.99948	6.78922	6.43967	6.88926	6.91599	6.7853	6.88244	7.21237
ENSMUSG00000029223	0.00952044	0.00067895	0.00986067	0.00534449	0.618745	0.00916488	y	5	higher	MI	8.65235	8.50879	8.45291	8.989	8.89243	8.83189	9.42961	9.33649	9.22767	8.98774	8.9311	8.884
ENSMUSG00000029231	0.0710484	0.00148887	0.00553299	0.00595063	0.0123289	0.920379	y	5	higher	MI	6.00391	5.88123	6.03572	6.20229	6.20787	6.04182	6.62125	6.63927	6.68992	6.47208	6.70558	6.74354
ENSMUSG00000029238	0.279528	0.0851567	0.178306	0.132631	0.436143	0.327727	n	5		MI	6.78922	6.82737	6.86734	6.82431	7.02132	6.89172	6.95892	7.20254	7.32944	6.86257	6.98577	7.16996
ENSMUSG00000029247	0.0233833	0.00882372	0.00381704	0.259011	0.0469124	0.217085	n	5		MI	8.46531	8.63588	8.77379	8.89652	9.11862	9.1411	9.07291	9.17782	9.33846	9.2282	9.35202	9.45823
ENSMUSG00000029249	0.870386	0.908359	0.867619	0.987531	0.966211	0.988212	n	5		MI	6.45876	6.0366	6.05629	6.4199	6.13324	6.08883	6.44067	5.73623	6.47855	6.56072	6.11441	5.99439
ENSMUSG00000029250	0.156177	0.00272558	0.655539	0.111068	0.307586	0.0456583	n	5		MI	9.19139	9.20438	9.25622	9.34827	9.47205	9.24835	9.53045	9.52727	9.54179	9.12967	9.28133	9.34124
ENSMUSG00000029267	0.00494315	0.00270856	0.000609926	0.0062341	0.000828927	0.0469846	y	5	intermediate	MI	8.0414	8.04751	8.02004	8.13024	8.13502	8.09889	8.23908	8.26068	8.30614	8.33552	8.37586	8.3185
ENSMUSG00000029283	0.196104	0.497091	0.773348	0.8244	0.670384	0.8187	n	5		MI	6.83266	6.98482	7.00849	6.75635	6.93474	6.7593	6.64438	7.02262	6.87384	6.6158	6.94627	7.11385
ENSMUSG00000029287	0.701785	0.00151175	0.00183407	0.108275	0.0431214	0.0408666	n	5		MI	7.18836	7.12983	7.21618	7.4416	7.33225	6.95656	7.70363	7.6346	7.56316	7.84242	7.74466	7.92814
ENSMUSG00000029290	0.368118	0.953613	0.267653	0.271532	0.552532	0.241643	n	5		MI	6.89724	7.07916	7.29442	6.8979	7.10243	6.83883	7.08826	6.95053	7.25912	6.6014	6.70372	7.15539
ENSMUSG00000029309	0.123738	0.00736624	0.172579	0.00792078	0.74363	0.0971759	y	5	higher	MI	7.676	7.8657	7.88087	8.03046	7.94733	7.91762	8.24283	8.18128	8.33308	7.921	7.89586	8.18702
ENSMUSG00000029311	0.968226	0.0464057	0.301794	0.0639305	0.329641	0.0479243	n	5		MI	7.22663	7.04317	7.09259	7.25736	7.12069	6.97164	7.52495	7.25912	7.43126	7.1101	6.69103	7.02894
ENSMUSG00000029328	0.0375124	0.000379369	0.000179469	0.0214025	0.345546	0.00306311	y	5	higher	MI	9.99648	10.0349	10.0002	10.3175	10.3057	10.1521	10.6175	10.6175	10.6147	10.3088	10.3566	10.3057
ENSMUSG00000029366	0.401695	0.0909566	0.0614611	0.0565152	0.127543	0.0124908	n	5		MI	5.27606	5.40517	5.39592	5.03106	5.27191	5.41483	5.529	5.55197	5.84027	4.73522	4.83778	5.16074
ENSMUSG00000029392	0.902784	0.155483	0.61063	0.000721692	0.498683	0.403556	n	5		MI	5.24464	5.16705	4.86193	5.0873	5.05047	5.0873	5.38625	5.33618	5.3221	5.46796	4.96908	5.14711
ENSMUSG00000029407	0.935606	0.054	0.241601	0.0716172	0.231506	0.0583283	n	5		MI	7.63143	7.81357	7.85718	7.71729	7.93564	7.67664	7.89404	8.12125	8.12519	7.23329	7.51384	7.78236
ENSMUSG00000029432	0.0406345	0.755144	0.0382497	0.0688069	0.147848	0.042216	n	5		MI	6.77926	7.07605	7.06949	6.53424	6.54269	6.66116	6.75805	6.89577	7.12548	5.77317	5.99073	6.5041
ENSMUSG00000029455	0.762241	0.251103	0.0703424	0.407846	0.0612659	0.0267208	n	5		MI	9.3502	9.37092	9.33119	9.59785	9.20229	9.37145	9.74304	9.32298	9.5694	8.98993	8.81891	9.17082
ENSMUSG00000029465	0.035253	0.00228519	0.674152	0.0121385	0.0435389	0.00225016	y	5	higher	MI	8.45778	8.31242	8.34031	8.53444	8.50706	8.60678	8.89061	8.78749	8.97942	8.3871	8.40002	8.22576
ENSMUSG00000029478	0.564907	0.186334	0.706356	0.533934	0.569806	0.443544	n	5		MI	7.60923	7.37689	7.32563	7.74243	7.33342	7.51437	7.72585	7.69873	7.46374	7.67486	7.62018	6.52037
ENSMUSG00000029538	0.0218252	0.00653117	0.157496	0.0290571	0.962648	0.064362	y	5	higher	MI	9.56579	9.67234	9.65029	9.78209	9.85906	9.7496	9.98562	10.1563	9.98812	9.63835	9.87805	9.86145
ENSMUSG00000029581	0.0695071	0.13457	0.125149	0.547024	0.522245	0.9928	n	5		MI	6.05838	6.49443	6.48438	6.63994	6.9222	6.81364	6.49352	6.6955	6.90093	6.68406	6.88625	6.52418
ENSMUSG00000029591	0.035989	0.806629	0.0470769	0.126029	0.260256	0.0563359	n	5		MI	6.44516	6.63071	6.5187	6.35512	6.33128	6.17188	6.33453	6.5301	6.64581	5.89683	6.14592	6.2852
ENSMUSG00000029599	0.140369	0.0218675	0.405249	0.140635	0.772585	0.697579	n	5		MI	7.47657	7.54769	7.57393	7.61314	7.80306	7.61084	7.71954	7.92056	7.87002	7.40857	7.71729	8.10655
ENSMUSG00000029603	0.625096	0.44083	0.341587	0.319192	0.61994	0.186612	n	5		MI	8.23048	7.93564	7.92634	8.24939	7.56947	7.91471	8.63225	7.96281	8.10345	8.19555	7.50128	7.55841
ENSMUSG00000029634	0.736608	0.733205	0.185567	0.961887	0.353042	0.293091	n	5		MI	8.79241	8.89776	8.86253	8.9425	8.41184	8.98362	9.03633	8.51791	8.82008	8.85687	8.36363	8.32511
ENSMUSG00000029673	0.096416	0.426136	0.211052	0.67651	0.462412	0.98244	n	5		MI	6.41629	6.22532	6.20956	6.58407	6.51001	6.36198	6.67588	6.32184	6.25675	6.50937	6.3116	6.42322
ENSMUSG00000032898	0.154738	0.0694597	0.362223	0.242673	0.0754049	0.0463723	n	5		MI	8.13099	8.0923	8.01465	8.27852	8.08855	8.25492	8.48517	8.19329	8.38038	8.0902	8.02954	7.96417
ENSMUSG00000034021	0.956945	0.680344	0.650512	0.803091	0.665353	0.530747	n	5		MI	6.23722	6.2603	6.28926	6.21653	6.42647	6.12744	6.08883	6.3517	6.23641	6.10998	6.32497	6.55637
ENSMUSG00000034724	0.590137	0.903784	0.535964	0.90813	0.444686	0.538442	n	5		MI	6.57492	6.33797	6.35696	6.74354	6.28926	6.5085	6.89092	5.82154	6.69416	6.96118	5.74727	5.59736
ENSMUSG00000034826	0.152054	0.581469	0.028293	0.425564	0.0672002	0.0368023	n	5		MI	7.17145	7.37618	7.37863	6.96723	7.23696	7.15958	7.03647	7.35114	7.31848	6.45564	6.68478	6.93003
ENSMUSG00000035898	0.273375	0.217961	0.00960865	0.100757	0.00714822	0.0174265	n	5		MI	6.66562	6.68263	6.83058	6.62224	6.58883	6.71704	6.85254	6.75038	7.06321	6.20868	6.20229	6.19657
ENSMUSG00000036256	0.874023	0.00227354	0.343146	0.0247141	0.362889	0.0702464	y	5	higher	MI	10.3828	10.2071	10.2872	10.4659	10.0263	10.3124	11.0105	10.8201	10.8201	10.6165	10.1906	10.5727
ENSMUSG00000036435	0.520187	0.0305577	0.035276	0.0260527	0.0316413	0.383728	y	5	intermediate	MI	6.86535	6.9413	6.88625	6.86933	6.91599	6.84112	7.05702	7.25092	7.21185	7.12373	7.29162	7.40074
ENSMUSG00000036687	0.653231	0.100645	0.190407	0.0700879	0.295084	0.0302153	n	5		MI	9.12464	9.06314	9.00175	9.04854	8.88128	9.13579	9.57369	9.17157	9.40323	9.05617	8.69568	8.84212
ENSMUSG00000037373	0.218999	0.094942	0.202574	0.20183	0.676108	0.337361	n	5		MI	7.74531	7.81609	7.72516	7.98349	7.77775	7.84169	8.23712	7.87595	8.06947	7.98996	7.74779	8.00547
ENSMUSG00000038056	0.563149	0.0883111	0.806723	0.111147	0.42325	0.0740101	n	5		MI	6.52111	6.37484	6.30896	6.51555	6.44516	6.38504	6.63927	6.47972	6.65091	6.51196	6.321	6.29972
ENSMUSG00000039156	0.239604	0.063114	0.133003	0.177341	0.275148	0.862715	n	5		MI	6.76862	6.62378	6.56663	6.77388	6.72402	6.75635	6.88875	6.78036	7.03932	6.77217	6.85102	7.16435
ENSMUSG00000039533	0.258434	0.00189483	0.282227	0.0459472	0.967198	0.063408	y	5	higher	MI	7.53401	7.58718	7.53723	7.7004	7.77687	7.52613	7.95084	8.00547	7.88925	7.59651	7.58365	7.83782
ENSMUSG00000039899	0.759682	0.331389	0.752853	0.198243	0.94769	0.247216	n	5		MI	7.45862	7.75815	7.97797	7.43767	7.82882	7.73942	7.75129	7.89238	8.25562	7.30566	7.84169	7.81407
ENSMUSG00000039987	0.0712366	0.0426119	0.125156	0.171238	0.393231	0.777413	n	5		MI	5.92608	6.11339	6.08012	6.12528	6.30523	6.27727	6.30146	6.39961	6.66672	6.16295	6.35884	6.67685
ENSMUSG00000040570	0.145649	0.0304416	0.491009	0.594396	0.74843	0.515956	n	5		MI	6.88556	6.99948	7.03802	7.26312	7.25333	6.99223	7.33795	7.1285	7.23038	6.84039	7.09785	7.38178
ENSMUSG00000040731	0.174499	0.0124114	0.216264	0.0200292	0.82933	0.0153141	y	5	higher	MI	9.8008	9.97563	9.99648	10.0139	10.1507	10.0012	10.2176	10.3196	10.3309	9.94784	10.0716	10.1002
ENSMUSG00000041132	0.316214	0.503243	0.468541	0.275834	0.989454	0.303684	n	5		MI	6.86461	6.93474	6.92073	6.71332	6.80077	6.94185	6.97363	6.80952	7.25036	6.88488	6.61879	6.94713
ENSMUSG00000041313	0.162068	0.0935945	0.838398	0.36515	0.143597	0.107205	n	5		MI	6.91252	6.86461	6.73151	7.03478	6.97106	6.87289	7.15224	6.8979	7.12211	6.90486	6.78337	6.86315
ENSMUSG00000041890	0.888119	0.288997	0.0444449	0.419595	0.043155	0.0698609	n	5		MI	6.40532	6.49352	6.49825	6.54269	6.41151	6.46482	6.56448	6.46894	6.5138	6.70293	6.65812	6.8979
ENSMUSG00000043323	0.374467	0.267566	0.12092	0.712352	0.411511	0.695109	n	5		MI	6.91471	6.61744	6.46067	7.05702	6.5762	6.95213	7.2455	6.63384	6.9793	7.29941	6.80283	7.04534
ENSMUSG00000045482	0.477953	0.0289801	0.947835	0.083761	0.474948	0.0186385	n	5		MI	8.70746	8.65308	8.64219	8.81944	8.83189	8.57235	8.96372	8.89405	9.11341	8.74284	8.60497	8.64516
ENSMUSG00000053094	0.0825718	0.00406611	0.00258005	0.00831278	0.00857131	0.0243535	y	5	intermediate	MI	9.5694	9.49603	9.47685	9.45046	9.39743	9.44988	9.33253	9.28266	9.25768	9.03261	9.00857	9.15802
ENSMUSG00000053581	0.796514	0.597372	0.313831	0.532053	0.326064	0.908907	n	5		MI	6.97246	6.99729	7.04107	7.06468	7.014	6.88244	6.90011	7.18932	7.08049	6.98952	7.05939	7.15713
ENSMUSG00000054920	0.778581	0.0816616	0.525993	0.104184	0.643019	0.307319	n	5		MI	6.3657	6.60402	6.53064	6.40155	6.50937	6.68829	6.66672	6.81872	7.08912	6.53305	6.41058	6.92772
ENSMUSG00000054932	0.189103	0.00548138	0.0125217	0.63791	0.305938	0.151302	n	5		MI	3.07728	3.07728	3.07728	3.99561	4.24067	3.07728	3.87157	4.09413	3.93559	4.14899	4.09413	4.51732
ENSMUSG00000055204	0.055083	0.0591468	0.021224	0.427215	0.414922	0.202228	n	5		MI	7.93175	7.93035	7.85173	8.13099	7.9867	8.16497	8.22116	8.02857	8.28766	8.07939	7.99558	8.03616
ENSMUSG00000057614	0.991068	0.0279089	0.291973	0.038986	0.349876	0.0162698	y	5	higher	MI	6.90589	7.06702	7.09127	6.84263	7.09505	7.12266	7.27521	7.3458	7.55841	6.69988	6.9334	7.01498
ENSMUSG00000058291	0.191238	0.80901	0.761114	0.786295	0.356864	0.694659	n	5		MI	4.96908	4.9643	5.01626	4.79889	4.96908	4.90097	4.69098	4.89626	5.2319	4.82112	5.04696	5.19592
ENSMUSG00000060152	0.0244719	0.0034803	0.109399	0.117482	0.718807	0.532453	n	5		MI	7.14346	7.13358	7.19065	7.40857	7.30566	7.29077	7.37062	7.45661	7.4672	7.29504	7.28534	7.52978
ENSMUSG00000061898	0.369026	0.259815	0.636696	0.132761	0.310747	0.66067	n	5		MI	5.62419	5.58704	5.53399	5.47288	5.63634	5.3221	5.70159	5.8534	5.56932	5.43661	5.68187	5.81025
ENSMUSG00000079111	0.0336924	0.00634364	0.030607	0.0742878	0.47115	0.0445383	n	5		MI	8.5882	8.47426	8.38038	8.7498	8.76305	8.8007	8.95222	8.81944	8.93617	8.809	8.72489	8.67165
ENSMUSG00000000915	0.0530259	0.0101313	0.112402	0.091162	0.742205	0.267646	n	5		ME	8.01069	7.78236	7.85099	7.73773	7.49236	7.428	7.38603	7.29634	7.03759	7.7467	7.50853	7.20699
ENSMUSG00000001844	0.0281345	0.0128127	0.00553412	0.5113	0.0226814	0.0221517	n	5		ME	10.6227	10.4438	10.3739	10.2754	10.0523	10.0513	10.1432	10.0919	9.93157	9.7507	9.67781	9.69245
ENSMUSG00000002486	0.323116	0.935725	0.195098	0.321377	0.812758	0.212576	n	5		ME	9.23776	8.97256	8.8766	9.42843	9.05762	9.13024	9.21414	9.04416	8.78615	9.38582	9.11479	9.22135
ENSMUSG00000005220	0.170837	0.116054	0.0894773	0.696082	0.453898	0.637033	n	5		ME	7.66407	8.01644	8.11285	8.03914	8.36973	8.23958	8.14645	8.22776	8.43748	8.09505	8.44584	8.51155
ENSMUSG00000005374	0.219295	0.391026	0.860439	0.0890046	0.404666	0.717351	n	5		ME	8.85714	8.58295	8.61078	9.00605	8.73398	8.82742	8.55237	8.73451	8.36526	8.93486	8.73333	8.25562
ENSMUSG00000007987	0.00166704	0.00114276	0.000821323	0.166609	0.000470891	0.00472905	n	5		ME	9.97165	10.0785	10.0695	9.5625	9.5883	9.61765	9.59652	9.70255	9.65825	9.34827	9.35065	9.38894
ENSMUSG00000013495	0.174897	0.119302	0.599422	0.831311	0.937242	0.99245	n	5		ME	9.01234	8.84815	8.77262	8.82742	8.49712	8.70606	8.78709	8.67617	8.47701	9.13901	8.88763	7.90133
ENSMUSG00000014529	0.00638457	0.0522632	0.0107844	0.739867	0.743822	0.582509	n	5		ME	11.494	11.5734	11.6071	11.0708	11.2413	11.2172	11.0509	11.3711	11.2234	11.0213	11.2336	11.1864
ENSMUSG00000015880	0.558483	0.852774	0.910598	0.717454	0.601706	0.925135	n	5		ME	8.71876	9.07196	9.00251	8.65514	9.00451	8.85052	8.69322	8.88486	9.11794	8.75132	9.06941	8.92155
ENSMUSG00000015882	0.432523	0.775002	0.767929	0.764493	0.22214	0.607171	n	5		ME	7.86272	8.14693	8.24423	8.05435	8.23484	8.33834	8.00102	7.95805	8.4833	7.87997	8.08059	8.15851
ENSMUSG00000019178	0.0106845	0.940515	0.000253721	0.115241	0.00356979	0.0212875	n	5		ME	9.60633	9.54265	9.59924	9.69799	9.77639	9.71098	9.52289	9.69799	9.51158	9.97342	9.93509	9.92907
ENSMUSG00000025532	0.108297	0.495411	0.186031	0.195776	0.546647	0.131588	n	5		ME	9.21953	9.18189	9.19187	9.27084	9.34386	9.23317	9.1322	9.27084	8.98567	9.19769	9.38104	9.42748
ENSMUSG00000028944	0.0715631	0.0282104	0.0081845	0.290476	0.010254	0.0479068	n	5		ME	10.1025	10.3401	10.3597	9.89868	10.1066	10.025	9.755	9.93305	9.99648	9.62865	9.68806	9.56847
ENSMUSG00000029086	0.00215959	0.000291633	0.0714972	0.413688	0.0275282	0.0188385	n	5		ME	9.10822	9.09749	8.98774	8.46218	8.4833	8.28211	8.26393	8.41935	8.3279	8.69993	8.71044	8.96626
ENSMUSG00000029119	0.842327	0.397334	0.844896	0.329691	0.994303	0.34162	n	5		ME	8.35824	7.83581	7.88466	8.40152	7.79634	8.03516	8.20358	7.5902	7.48313	8.46741	7.8907	7.88087
ENSMUSG00000029130	0.00784175	0.0205072	0.135534	0.891	0.285113	0.271698	n	5		ME	10.8465	10.745	10.7522	10.3991	10.5044	10.3141	10.3278	10.5393	10.31	10.5965	10.6961	10.3622
ENSMUSG00000029131	0.399308	0.247478	0.90416	0.208972	0.585109	0.83763	n	5		ME	10.3566	10.3677	10.3527	10.3076	10.3263	10.3769	10.3634	10.3659	10.3925	10.4418	10.3439	10.3076
ENSMUSG00000029136	0.0169661	0.0135467	0.0204489	0.258914	0.0396505	0.0624147	n	5		ME	7.69533	7.66752	7.65659	7.38845	7.5119	7.44873	7.30825	7.45021	7.37568	6.9106	7.19279	7.15457
ENSMUSG00000029147	0.700199	0.676684	0.84057	0.93548	0.899709	0.85471	n	5		ME	12.0041	11.6564	11.5701	11.8613	11.4791	11.6755	11.936	11.5543	11.4791	12.0041	11.639	11.4524
ENSMUSG00000029165	0.856285	0.759685	0.991951	0.607862	0.868891	0.809836	n	5		ME	11.264	10.9595	10.8842	11.2609	10.8716	11.0688	11.1544	10.924	10.8877	11.3188	10.9768	10.8059
ENSMUSG00000029166	0.477141	0.205582	0.663019	0.549002	0.819596	0.431767	n	5		ME	8.20698	7.71729	7.65936	7.9962	7.13293	7.72045	7.88828	7.05817	7.19361	8.25194	7.4153	7.45485
ENSMUSG00000029188	0.00991736	0.00115909	0.000421928	0.0276626	0.00750296	0.125378	y	5	intermediate	ME	8.95017	8.85305	8.79013	8.60368	8.40952	8.53519	8.24423	8.29913	8.2105	8.19149	8.03767	8.17607
ENSMUSG00000029206	0.00345521	0.00362965	0.000716976	0.305721	0.0658117	0.0152524	n	5		ME	9.96095	9.87221	9.80484	10.3752	10.2186	10.3843	10.3112	10.188	10.2469	10.5758	10.4139	10.5379
ENSMUSG00000029265	0.910524	0.91359	0.872826	0.832771	0.966526	0.797123	n	5		ME	9.70344	9.92213	10.0024	9.72122	9.94227	10.0092	9.65989	9.89983	10.0201	9.77639	9.87311	10.0388
ENSMUSG00000029279	0.290518	0.952506	0.00228056	0.316842	0.083573	0.0175809	n	5		ME	10.4565	10.5502	10.5379	10.3677	10.3478	10.5515	10.4817	10.4506	10.6241	10.2806	10.2354	10.1838
ENSMUSG00000029312	0.00193434	0.000364875	0.00379459	0.015946	0.0266116	0.544872	y	5	intermediate	ME	8.15461	8.19215	8.18847	6.58744	6.3985	6.30146	6.98876	6.86257	6.88625	6.798	6.72402	7.01707
ENSMUSG00000029330	0.000589974	0.000455079	0.0040468	0.189884	0.27109	0.789377	n	5		ME	9.7496	9.69799	9.67949	9.43001	9.38229	9.41696	9.38894	9.31547	9.38624	9.33202	9.2915	9.42655
ENSMUSG00000029402	0.691034	0.560576	0.000190999	0.957105	0.00243641	0.000193925	n	5		ME	9.03261	9.11177	9.11073	8.97256	9.17559	9.0182	9.00077	9.10352	9.07412	8.36973	8.49127	8.4295
ENSMUSG00000029403	0.318227	0.226224	0.476842	0.389608	0.288481	0.145934	n	5		ME	9.53347	9.49424	9.50337	9.48173	9.51822	9.4429	9.52482	9.37145	9.38104	9.58486	9.45412	9.63059
ENSMUSG00000029423	0.124471	0.27857	0.0475773	0.763317	0.0973539	0.254738	n	5		ME	10.6388	10.5866	10.5453	10.472	10.2918	10.5145	10.598	10.0906	10.4265	10.2896	9.90243	10.1664
ENSMUSG00000029433	0.112837	0.00688917	0.0698471	0.498248	0.39678	0.044816	n	5		ME	10.9866	11.0602	11.0026	11.206	11.2622	11.0547	11.1901	11.2892	11.2037	11.1128	11.1516	11.0547
ENSMUSG00000029442	0.0263999	0.00864557	0.0120512	0.00512333	0.412539	0.108961	y	5	lower	ME	9.26977	9.02989	8.99307	8.73899	8.62978	8.64438	8.47179	8.36526	8.38923	8.72907	8.48049	8.57335
ENSMUSG00000029458	0.355484	0.0278275	0.319572	0.128101	0.429572	0.719959	n	5		ME	9.72364	9.52289	9.43585	9.53347	9.22043	9.51291	9.32298	9.0992	9.11073	9.5694	9.26916	8.1605
ENSMUSG00000029486	0.409014	0.422312	0.753788	0.813297	0.363572	0.347323	n	5		ME	7.69308	7.8622	8.04007	7.61748	7.87902	7.74912	7.42858	7.90653	7.78529	7.63949	8.00805	8.12892
ENSMUSG00000029505	0.542414	0.412743	0.218169	0.971799	0.650709	0.569799	n	5		ME	9.61027	9.45929	9.43726	9.58083	9.33046	9.41124	9.52351	9.41769	9.37145	9.46432	9.3092	9.41962
ENSMUSG00000029516	0.855099	0.940127	0.25244	0.77196	0.239126	0.179329	n	5		ME	7.68935	6.94942	6.84039	7.62681	6.97433	7.07464	7.524	7.11679	6.75498	7.94962	7.39884	7.44544
ENSMUSG00000029576	0.529271	0.136716	0.62688	0.0955429	0.707923	0.105163	n	5		ME	9.04256	9.03976	8.96372	9.02584	8.87179	9.02584	9.20156	9.03169	9.16457	8.97028	8.983	9.03976
ENSMUSG00000029601	0.190393	0.102104	0.291593	0.497463	0.665252	0.310091	n	5		ME	8.7938	8.4833	8.29161	8.45056	8.1074	8.13099	8.34527	8.07856	7.86717	8.50191	8.25371	8.14693
ENSMUSG00000029703	0.0209658	0.0626571	0.0124761	0.169752	0.301583	0.0866134	n	5		ME	10.6998	10.6074	10.6252	10.5131	10.4733	10.5238	10.5229	10.5943	10.5328	10.5113	10.402	10.4645
ENSMUSG00000029725	0.0548673	0.961625	0.784462	0.0714606	0.470216	0.793224	n	5		ME	8.5253	8.29822	8.35325	8.69743	8.60071	8.5882	8.43061	8.49375	8.23653	8.78501	8.55863	7.4416
ENSMUSG00000034110	0.951644	0.769544	0.291793	0.779748	0.273605	0.340322	n	5		ME	8.57761	8.67748	8.7464	8.60601	8.7316	8.65196	8.66401	8.69472	8.58711	8.47179	8.61444	8.64889
ENSMUSG00000034842	0.651071	0.824493	0.271512	0.762567	0.279129	0.224857	n	5		ME	10.3088	10.6388	10.6688	10.3453	10.5393	10.5346	10.354	10.5544	10.6085	10.2689	10.4708	10.354
ENSMUSG00000036377	0.142623	0.0670811	0.433213	0.526754	0.447843	0.453895	n	5		ME	9.38332	9.29258	9.3061	9.24349	9.20156	9.30776	9.21868	9.16533	9.27632	9.4397	9.3283	3.07728
ENSMUSG00000036928	0.711596	0.121266	0.05094	0.0676105	0.00527357	0.163999	n	5		ME	11.1901	11.1516	11.0688	11.1666	11.1426	11.1474	11.1844	11.2587	11.2281	11.2465	11.2953	11.2657
ENSMUSG00000037017	0.00355192	0.0146757	0.00512871	0.217844	0.689965	0.131399	n	5		ME	9.99763	9.94115	9.86683	9.5713	9.67056	9.53438	9.59785	9.75785	9.69185	9.54657	9.57369	9.59785
ENSMUSG00000037235	0.0830667	0.0344642	0.263206	0.293538	0.354752	0.411686	n	5		ME	9.06014	8.86708	8.87074	8.8234	8.67493	8.7452	8.70746	8.72704	8.54246	8.783	8.49008	7.03932
ENSMUSG00000037355	0.0303637	0.00352919	0.0153038	0.090994	0.164475	0.856048	n	5		ME	5.72882	5.6447	5.62214	5.40727	5.47528	5.25531	5.19397	5.28156	5.09461	5.34883	5.0873	5.18856
ENSMUSG00000037390	0.362015	0.307563	0.105388	0.563592	0.050837	0.070813	n	5		ME	8.16921	8.25765	8.29003	7.98869	8.27981	8.14819	7.74139	8.29856	8.0245	8.30938	8.59897	8.64638
ENSMUSG00000037979	0.699088	0.314399	0.263179	0.557819	0.425145	0.738381	n	5		ME	11.3312	10.8267	10.8087	11.2258	10.5183	10.8895	11.0576	10.5749	10.4802	11.0795	10.3828	10.3249
ENSMUSG00000038564	0.234527	0.0077433	0.016045	0.0715864	0.191845	0.195921	n	5		ME	11.5293	11.547	11.5639	11.4368	11.5543	11.3436	11.2565	11.3139	11.2018	11.268	11.3819	11.3381
ENSMUSG00000039782	0.344179	0.932429	0.952229	0.466566	0.414998	0.90339	n	5		ME	7.8842	8.0757	8.09196	7.96139	8.25663	8.19916	7.82196	8.13878	8.12477	7.78953	8.09947	8.13789
ENSMUSG00000040013	0.0721644	0.000216205	0.000100954	0.232176	0.0177499	0.0017064	n	5		ME	8.97513	8.94375	9.00451	9.18279	9.28937	9.0714	9.26977	9.32015	9.26916	9.51757	9.52482	9.59544
ENSMUSG00000040473	0.694505	0.946113	0.330337	0.736675	0.167658	0.283704	n	5		ME	9.755	10.1488	10.1676	9.70854	10.0866	10.0476	9.76801	10.0686	10.195	10.0156	10.3044	10.31
ENSMUSG00000042249	0.00490976	0.00805487	0.236319	0.0486179	0.0128086	0.0175589	y	5	lower	ME	7.58159	7.62453	7.51147	7.24251	7.30132	7.36303	6.91599	7.16274	7.04712	7.52351	7.48686	7.54324
ENSMUSG00000042594	0.38665	0.332755	0.623027	0.799823	0.678432	0.806608	n	5		ME	8.86647	8.64303	8.62115	9.08889	8.55706	9.07291	9.03538	8.69322	8.82399	9.10093	8.61138	8.69692
ENSMUSG00000042726	0.210913	0.0404378	0.158941	0.593478	0.522989	0.723761	n	5		ME	10.8423	10.6682	10.6271	10.6531	10.324	10.6004	10.5346	10.4469	10.3967	10.6832	10.3342	10.1743
[truncated: 5,001 more rows]
